# Supplementary material
Source: publisher figshare collection journal article supplement (https://gsajournals.figshare.com/ndownloader/files/15291026)
Supplement: Supplementary file 1 [file 15291026]

## Sheet: TableS1
At Gene	Es Gene	Bak-5	Col-0	Cvi	Eds-9	tv-7	UKID116	Zal-1	Shandong	Yukon
AT1G01040.1	Thhalv10006531m	6.66103	8.51777	14.1962	11.2963	11.4574	15.8279	13.8264	4.85507	9.40897
AT1G01320.1	Thhalv10006538m	57.6375	97.8123	69.6148	50.9275	100.027	63.6408	41.3309	32.9267	55.72
AT1G01440.1	Thhalv10007009m	8.21972	7.24586	7.17734	8.7302	6.80366	7.68238	10.5977	5.3937	9.34952
AT1G01650.1	Thhalv10007312m	14.6293	16.8742	20.7727	28.1175	29.7313	18.4011	33.3055	6.06624	15.6291
AT1G01950.1	Thhalv10006753m	13.9757	8.26452	16.0921	7.84246	6.32515	12.2415	5.63605	9.07431	9.55904
AT1G02080.1	Thhalv10006521m	22.6793	19.1965	25.5461	19.243	21.304	24.6709	23.8329	10.2317	28.3532
AT1G02840.1	Thhalv10028867m	67.0119	58.994	79.3391	45.1522	48.1832	85.5037	79.2884	31.5114	37.9214
AT1G02890.1	Thhalv10006579m	40.7659	18.9624	38.5322	17.9038	21.9924	35.9618	23.3652	14.1834	25.8428
AT1G02990.1	Thhalv10006698m	5.657	5.46493	5.43279	4.30611	4.73532	5.94587	7.13243	4.71619	13.8048
AT1G03060.1	Thhalv10006519m	7.46796	6.67881	9.04567	5.33851	4.85112	7.97665	8.14052	4.62176	15.1285
AT1G03100.1	Thhalv10006842m	1.43698	2.02151	1.46141	0.822364	1.13385	1.48043	0.509092	1.29219	2.41876
AT1G03190.1	Thhalv10006888m	5.39576	4.95358	5.63651	2.37444	4.31792	6.24032	4.65163	4.1236	6.03956
AT1G03280.1	Thhalv10023437m	25.5598	20.2707	27.0174	18.9356	17.2665	26.8604	22.5382	22.3966	20.9131
AT1G03380.1	Thhalv10006706m	8.57993	10.0969	8.45479	9.79966	10.6518	8.86786	17.6207	6.08396	13.8422
AT1G03830.1	Thhalv10022496m	4.41865	4.05975	4.71709	2.74149	2.01422	4.0612	1.15368	3.61124	2.50791
AT1G03860.1	Thhalv10008384m	47.1378	54.8979	63.8521	37.9392	33.7917	48.6505	28.7372	51.8934	45.6037
AT1G03910.1	Thhalv10006994m	26.1157	19.899	26.8999	14.1479	18.3909	23.3974	19.0342	16.126	12.164
AT1G04050.1	Thhalv10007184m	2.0337	1.78686	1.51192	0.188616	0.569472	2.79717	0.235914	5.24442	4.23078
AT1G04080.1	Thhalv10006844m	48.9726	47.8163	50.7792	41.2635	64.1023	51.3874	52.9149	22.3432	32.0984
AT1G04120.1	Thhalv10006549m	16.5008	11.5789	15.4956	7.26911	10.7177	16.3164	9.41254	8.14842	17.0238
AT1G04140.1	Thhalv10006848m	35.1618	31.822	35.1103	29.0135	28.8323	34.9081	30.3367	20.6963	44.2048
AT1G04160.1	Thhalv10006554m	3.29426	2.5603	3.20388	1.32437	2.00095	2.32495	0.252717	1.18638	1.6366
AT1G04170.1	Thhalv10000157m	61.2684	61.9521	55.9522	37.745	37.9518	60.1546	45.4323	23.1328	17.6445
AT1G04210.1	Thhalv10006614m	13.8258	12.4473	15.8677	9.67382	9.61854	12.6157	13.4102	8.26352	15.8978
AT1G04300.1	Thhalv10006644m	14.5151	17.5841	28.3696	16.0131	9.17168	26.2164	39.8538	8.44986	17.1594
AT1G04390.1	Thhalv10006788m	3.57419	2.97396	3.4121	3.08759	3.86048	3.26206	6.20047	3.29562	6.4881
AT1G04400.1	Thhalv10007081m	31.3517	65.9053	50.6039	54.8926	74.6	55.1386	75.9718	113.412	163.278
AT1G04510.1	Thhalv10007366m	30.5901	29.7265	35.1873	17.9823	19.2312	27.6107	24.1257	19.1274	19.1205
AT1G04790.1	Thhalv10007101m	11.1968	11.7471	9.22614	9.09001	10.6346	11.2399	12.3193	37.4918	35.8932
AT1G04810.1	Thhalv10006675m	22.0882	16.5026	26.8909	16.7289	17.6957	21.8567	24.3329	7.31031	9.28614
AT1G04850.1	Thhalv10007758m	73.6404	49.5097	81.4092	45.1926	43.8746	74.2086	62.7288	44.8093	42.433
AT1G04860.1	Thhalv10006716m	13.2665	8.90739	12.12	7.41016	7.48656	11.5227	8.01138	6.98815	10.4133
AT1G05120.1	Thhalv10006803m	10.7424	7.93215	11.3658	6.10607	6.29516	11.461	6.27248	4.89506	5.83988
AT1G05380.1	Thhalv10009713m	14.0781	8.42244	13.5041	6.92724	9.57883	13.6353	10.853	5.15657	8.69198
AT1G05460.1	Thhalv10006684m	4.65494	6.30629	5.70881	3.27346	4.46273	5.72331	2.1938	3.68774	6.54918
AT1G05670.1	Thhalv10010012m	2.69049	2.87272	3.06538	1.18126	2.10678	2.71543	1.59579	1.87726	3.40256
AT1G05910.1	Thhalv10006586m	10.4922	9.85204	13.0633	5.34975	6.45502	11.3044	6.93044	6.93074	11.2195
AT1G06410.1	Thhalv10006783m	58.7078	25.8447	59.8386	40.0647	22.9086	39.7088	40.2663	39.9548	45.9255
AT1G06490.1	Thhalv10006529m	1.46641	0.72628	1.79886	0.450168	0.800323	0.983227	0.410062	3.15406	7.58456
AT1G06670.1	Thhalv10006566m	12.3961	10.5291	16.605	6.33777	7.81454	14.0557	8.20938	3.75894	6.28165
AT1G06720.1	Thhalv10027216m	10.3584	10.4833	14.8668	4.60636	6.20471	12.8889	4.35029	0	0
AT1G06840.1	Thhalv10006712m	12.8376	5.52896	10.0936	5.5641	4.22842	11.2678	10.1915	5.68572	8.61881
AT1G06900.1	Thhalv10006660m	17.9158	13.3671	20.8225	9.71955	12.6704	16.5971	11.1114	12.3785	16.3139
AT1G07110.1	Thhalv10006901m	43.5899	59.8479	30.6255	50.3716	54.715	36.6126	77.248	46.4884	58.3467
AT1G07510.1	Thhalv10006814m	6.83911	4.51378	12.0612	5.42596	5.35346	7.55772	3.77497	11.1086	19.1048
AT1G07670.1	Thhalv10006641m	23.3492	14.136	25.6955	9.95262	9.57974	18.7399	12.8415	16.9475	22.7563
AT1G07705.1	Thhalv10007092m	11.5134	12.4854	10.8895	8.98233	11.3262	9.67842	10.0928	7.15324	11.8357
AT1G07710.1	Thhalv10009425m	0.499474	0.222945	2.18361	0.205505	0.255523	1.48177	0.463751	0.596627	0.696362
AT1G07910.1	Thhalv10006605m	6.52532	5.77042	7.46617	4.9787	7.24568	5.92831	6.53642	4.95369	5.26249
AT1G07970.1	Thhalv10006976m	6.46859	7.47271	7.80154	4.85891	5.73654	7.90703	4.43339	4.21834	3.94227
AT1G07990.1	Thhalv10006825m	16.4523	14.1379	17.9333	17.3932	14.6994	19.1057	23.6946	15.6093	24.6743
AT1G08060.1	Thhalv10006530m	4.6821	4.62479	4.69891	3.31916	4.40827	4.73072	4.26486	1.72698	4.96278
AT1G08125.1	Thhalv10008555m	14.8242	14.4584	17.004	13.6943	11.1704	18.162	15.0815	9.42277	9.31447
AT1G08260.1	Thhalv10006524m	3.52561	3.50394	3.68779	1.72549	1.68637	3.17394	1.30171	3.6552	5.32751
AT1G08410.1	Thhalv10007194m	9.01832	7.79334	12.7884	5.21539	5.44519	11.5965	6.78693	14.7949	19.0178
AT1G08420.1	Thhalv10006669m	20.0604	15.4988	23.0019	14.8561	15.9986	20.9396	18.3081	10.5951	15.4476
AT1G08450.1	Thhalv10007710m	40.4365	43.6433	32.5997	111.519	33.308	50.1297	259.174	92.6596	244.522
AT1G08600.1	Thhalv10006555m	7.81238	6.39544	10.8545	4.08358	4.94674	7.19848	4.73953	3.86158	6.98386
AT1G08620.1	Thhalv10006592m	7.50655	6.72446	11.5057	4.40731	6.42594	7.98745	6.18323	3.9078	7.66481
AT1G08680.1	Thhalv10007026m	12.3762	11.0796	15.2578	10.1616	10.5398	12.6078	10.8347	10.5229	14.4875
AT1G08720.1	Thhalv10006727m	11.0411	9.5202	13.3379	10.011	9.41536	9.9256	17.9775	3.86821	7.60142
AT1G08820.1	Thhalv10007714m	15.6539	15.0137	27.8173	12.3517	10.3602	24.7721	25.2114	18.6163	29.8997
AT1G08840.1	Thhalv10006571m	2.52343	2.99534	4.33546	2.16903	1.41192	1.78007	1.11508	2.16635	4.39454
AT1G09020.1	Thhalv10007484m	20.8322	22.3178	21.4774	16.2047	17.4041	19.7561	16.742	21.7981	31.8327
AT1G09060.1	Thhalv10006723m	18.3721	18.7097	23.8991	17.8285	14.6309	18.1068	17.3661	9.33323	11.9093
AT1G09280.1	Thhalv10007152m	12.3491	8.9688	13.0742	8.65007	6.46038	13.408	18.1942	10.9439	7.99097
AT1G09730.1	Thhalv10006645m	11.9985	9.73407	12.7544	10.709	10.0756	12.995	14.771	11.6018	15.0186
AT1G09980.1	Thhalv10006833m	11.5794	12.1344	12.1415	8.522	10.1625	12.6446	13.0952	7.29197	9.30771
AT1G10130.1	Thhalv10006682m	15.6069	12.7096	15.6323	13.9341	13.3699	13.349	18.4663	6.92911	14.6451
AT1G10170.1	Thhalv10006632m	8.71293	10.6499	20.3836	9.56137	9.46183	15.3753	8.70806	1.79597	1.2096
AT1G10180.1	Thhalv10006875m	10.2044	9.11592	9.97232	5.11488	6.85634	10.5772	6.13569	14.9287	16.0712
AT1G10290.1	Thhalv10006739m	25.0816	27.0808	28.8108	22.4409	21.7465	21.8125	24.0192	11.9077	20.023
AT1G10390.1	Thhalv10006652m	29.922	23.2893	31.5029	17.7366	19.2635	27.7619	23.3091	15.3845	25.1129
AT1G10450.1	Thhalv10006620m	9.06653	6.71011	11.3973	5.69097	5.75182	9.33885	9.97933	2.12583	4.51718
AT1G10490.1	Thhalv10006661m	6.99178	11.2296	8.52955	6.39735	5.82255	7.32132	5.81291	6.34239	8.6077
AT1G10870.1	Thhalv10006873m	9.03383	8.40853	10.5309	4.38792	5.31204	7.53311	4.48354	6.82586	10.0256
AT1G10930.1	Thhalv10006602m	4.70598	7.30718	5.30196	3.01029	2.392	3.77911	2.42651	4.71934	7.93199
AT1G10950.1	Thhalv10023368m	60.5802	42.7616	57.477	43.0059	45.6965	52.5916	59.7536	22.5309	21.0471
AT1G11390.1	Thhalv10007063m	6.41416	4.51502	7.0103	3.56311	3.96897	6.03188	4.23829	6.42431	10.7371
AT1G11660.1	Thhalv10006883m	14.0617	14.1397	12.6857	9.98281	10.5056	11.6421	11.2293	10.2988	12.9517
AT1G11720.1	Thhalv10006631m	17.5553	20.277	12.3786	16.5888	22.7088	15.5586	8.49754	28.3814	27.3262
AT1G11790.1	Thhalv10007886m	12.8096	22.3356	11.6233	12.8152	18.1087	9.99753	3.73371	17.4692	33.4188
AT1G12290.1	Thhalv10006784m	4.4917	1.17699	2.16102	2.84073	1.31082	3.3919	6.36074	7.71457	12.356
AT1G12360.1	Thhalv10007001m	32.9998	18.892	31.2994	30.7409	17.614	29.7625	73.6928	15.0072	36.5337
AT1G12470.1	Thhalv10006686m	17.0752	12.7277	17.1014	9.66573	20.6147	24.7991	8.88793	16.5543	25.4472
AT1G12580.1	Thhalv10007365m	28.309	15.4732	34.2471	26.1907	10.7455	20.3143	34.3348	13.0534	19.3952
AT1G12840.1	Thhalv10007948m	51.3704	56.909	53.2727	44.3738	53.9621	47.0165	41.7789	81.3263	86.5836
AT1G12930.1	Thhalv10006676m	8.50348	8.71856	7.49524	6.43728	7.17409	9.24013	9.79943	6.18918	8.22283
AT1G13120.1	Thhalv10007079m	10.4309	10.4387	11.0022	5.72027	7.41408	9.83656	8.10342	5.54498	7.78644
AT1G13160.1	Thhalv10006828m	14.6574	10.6349	19.7449	4.94619	5.83785	17.545	6.74968	13.5054	13.3459
AT1G13560.1	Thhalv10007875m	33.5967	38.2839	28.7967	33.7429	32.4967	29.5637	35.6457	22.7961	27.5543
AT1G13980.1	Thhalv10009607m	12.4443	7.79881	12.1933	10.3593	8.52853	12.326	13.7231	3.59081	7.26132
AT1G14610.1	Thhalv10006653m	38.2778	34.8019	42.9158	23.7394	24.7042	39.3344	21.5067	1.1923	2.22478
AT1G14650.1	Thhalv10016290m	26.6122	20.6783	26.9404	13.3863	17.1928	26.5216	24.6129	8.0033	11.8679
AT1G14830.1	Thhalv10007102m	45.5266	31.1237	51.5465	21.6858	24.3788	35.6834	24.3432	17.4487	34.1273
AT1G14850.1	Thhalv10006562m	9.12323	7.44236	9.76209	5.00432	7.57041	9.93405	6.44161	4.96124	8.97593
AT1G15240.1	Thhalv10006665m	12.9881	12.2413	13.1876	12.2123	13.7176	14.241	17.7639	6.05511	8.84468
AT1G15440.1	Thhalv10006752m	10.4347	9.78913	14.947	3.69731	6.09158	13.5285	5.44427	6.03117	5.57472
AT1G15750.1	Thhalv10006622m	45.3282	48.3718	46.8153	23.8569	19.0278	56.3681	40.4033	9.73654	17.7994
AT1G15780.1	Thhalv10006572m	13.4451	11.1113	18.2816	11.154	13.5526	15.4579	13.0903	5.08725	12.5831
AT1G15940.1	Thhalv10006733m	14.0578	11.3847	13.7027	6.19201	6.49721	17.9798	5.86378	13.9758	16.4005
AT1G16270.1	Thhalv10006624m	10.9527	9.00051	12.6733	5.80313	7.95763	10.8878	8.34975	7.74969	16.0173
AT1G16480.1	Thhalv10006722m	1.1187	0.898251	1.28387	0.326471	0.67059	0.779548	0.677844	0.647619	0.656047
AT1G16540.1	Thhalv10006808m	3.76284	3.29791	4.1647	2.51718	2.49017	4.34695	5.17448	2.94607	5.5415
AT1G16650.1	Thhalv10007372m	4.88502	3.80891	7.01176	4.28632	2.47021	5.60959	7.9713	2.94462	2.24021
AT1G16680.1	Thhalv10007268m	11.4842	11.8608	9.48855	6.2759	8.032	10.5785	7.83414	6.40597	8.36758
AT1G16710.1	Thhalv10006544m	7.48622	6.34642	9.6711	6.2298	7.84634	10.029	8.28667	4.25835	9.85347
AT1G16800.1	Thhalv10006526m	3.29565	2.9537	2.8405	0.688711	1.19805	1.90624	1.54587	1.29708	2.35717
AT1G17210.1	Thhalv10006705m	15.7103	19.6755	16.9581	15.1259	16.3545	24.1504	21.4877	15.496	21.7801
AT1G17220.1	Thhalv10006681m	72.553	135.646	72.2507	87.5595	101.375	74.981	61.1037	84.3761	90.3841
AT1G17450.1	Thhalv10017997m	3.49299	2.97735	2.7496	5.19185	4.09036	3.16055	5.69767	3.32984	10.5614
AT1G17580.1	Thhalv10006551m	8.95599	8.20443	11.1599	8.47855	8.36345	10.38	8.5214	4.3354	13.5769
AT1G17680.1	Thhalv10006758m	9.38574	8.42943	10.2934	7.31536	8.36793	10.1028	10.4634	7.42307	15.0107
AT1G17690.1	Thhalv10006892m	11.3639	10.275	9.73397	3.75866	5.41079	7.29485	6.74561	9.70896	10.1674
AT1G17720.1	Thhalv10007406m	30.3389	24.8726	27.2667	15.7626	18.6427	28.532	18.9431	14.0508	24.0009
AT1G17760.1	Thhalv10006915m	6.9237	8.45671	6.05579	4.85293	6.02699	6.72479	5.91552	6.2718	8.5428
AT1G18070.1	Thhalv10027757m	67.7608	62.8021	65.0453	40.46	47.9678	52.726	34.7149	29.9457	31.7758
AT1G18160.1	Thhalv10006685m	18.1464	12.7503	17.6476	20.9307	11.5419	16.4714	38.7335	8.76785	16.2042
AT1G18270.1	Thhalv10006567m	19.669	9.43228	23.8219	21.4801	15.7753	15.1012	30.0467	6.32782	14.4958
AT1G18610.1	Thhalv10007275m	5.64265	6.28653	4.55866	1.61563	2.20213	4.37883	2.09723	2.67344	3.13675
AT1G18950.1	Thhalv10006851m	12.6157	10.7046	13.2394	7.29619	9.49987	13.032	9.18606	5.21584	8.71309
AT1G19100.1	Thhalv10006991m	4.56443	5.86381	5.22172	2.65273	4.49433	4.01333	4.32502	12.7513	9.72777
AT1G19860.1	Thhalv10007764m	7.5243	10.1604	9.25255	8.00577	11.083	8.47842	9.06043	8.51624	11.0758
AT1G20200.1	Thhalv10007479m	41.1192	32.7659	46.2164	32.0425	31.6439	39.0139	37.0141	25.5059	30.6683
AT1G20760.1	Thhalv10006674m	17.8609	14.2323	16.3358	17.9072	16.4118	15.1671	18.497	11.974	17.2503
AT1G20920.1	Thhalv10006608m	18.7532	13.7024	21.765	10.9016	17.3031	30.7865	15.0289	10.0549	19.9257
AT1G20960.1	Thhalv10006525m	25.3655	24.6701	27.1925	12.7735	19.2648	22.8243	18.2993	11.0831	18.5223
AT1G20970.1	Thhalv10006715m	26.1333	9.99848	24.7187	11.3319	9.66346	21.5974	12.5603	5.90091	9.09544
AT1G21170.1	Thhalv10006745m	13.3056	7.20207	11.1688	7.23117	7.60212	9.67402	8.34393	11.662	21.2521
AT1G21380.1	Thhalv10007405m	30.9472	21.4826	38.6578	27.2624	27.5288	29.2434	40.4245	8.55641	10.2488
AT1G21580.1	Thhalv10006523m	12.5247	13.9375	13.6793	12.7907	11.0184	19.4792	13.1746	4.11541	12.5561
AT1G21630.1	Thhalv10006584m	18.7699	15.1184	19.222	14.6666	22.0294	17.1378	22.0181	9.42955	15.8584
AT1G21700.1	Thhalv10006819m	16.0478	13.6577	16.5593	9.52518	10.3329	15.9752	11.7088	6.38241	13.0643
AT1G22620.1	Thhalv10006740m	16.4938	12.4991	16.6418	12.5421	12.1511	16.6043	17.9838	9.4546	15.9776
AT1G22770.1	Thhalv10006603m	8.63063	3.6677	8.29175	29.0005	62.2492	6.55663	45.6647	13.4654	15.23
AT1G22860.1	Thhalv10006692m	7.80704	6.3861	7.13179	5.02088	6.36559	6.92713	8.16251	5.28489	9.07527
AT1G22960.1	Thhalv10006897m	3.97328	2.22058	3.80168	1.44266	2.15756	3.62715	1.81432	3.96808	5.52831
AT1G23180.1	Thhalv10006791m	11.0492	15.2756	13.6178	9.24945	14.5188	8.09845	4.83844	20.4708	24.6242
AT1G23230.1	Thhalv10006548m	9.44183	8.71098	12.0595	7.5474	12.3867	10.972	5.62486	3.18896	6.33552
AT1G23870.1	Thhalv10006773m	16.9871	5.57366	28.4313	7.58014	1.23836	12.4383	25.5829	3.89497	11.7398
AT1G23900.1	Thhalv10006767m	14.7927	13.3707	15.5432	8.44913	13.8218	16.8368	12.4237	7.75503	16.553
AT1G24300.1	Thhalv10006556m	10.0254	11.5494	13.6025	8.85299	13.2606	12.5657	12.0026	4.96663	11.8606
AT1G24460.1	Thhalv10006539m	11.4146	9.64502	12.3858	8.51195	9.86048	11.0193	9.24394	5.19459	15.4109
AT1G24706.1	Thhalv10006540m	12.662	11.6972	14.9627	10.133	11.7023	12.3723	10.2995	7.49045	14.862
AT1G25540.1	Thhalv10006778m	14.6039	10.8366	19.4383	10.1815	8.30247	16.1786	12.8849	4.87121	13.8308
AT1G26130.1	Thhalv10006594m	3.21363	4.22072	3.61457	5.54522	8.36385	4.83765	7.41203	3.80163	6.0912
AT1G26170.1	Thhalv10006742m	9.45487	10.5301	11.3147	6.43235	7.90246	8.60624	8.34261	6.98121	8.79239
AT1G27370.1	Thhalv10007832m	4.20536	5.95771	3.47408	2.91545	3.567	4.79292	4.40469	2.8201	5.32788
AT1G27750.1	Thhalv10006638m	8.11493	7.26066	8.96786	5.44335	5.63664	9.28257	8.46121	3.29374	5.7714
AT1G27850.1	Thhalv10006616m	9.17497	8.69247	9.35556	5.72397	5.58039	9.68399	6.98212	5.49746	12.0666
AT1G27960.1	Thhalv10007434m	6.41683	4.49833	4.60467	9.80482	1.70256	5.80322	3.20145	2.71795	3.84558
AT1G28090.1	Thhalv10007307m	8.27666	11.0673	9.6	6.3942	7.52934	8.11129	8.11783	7.89479	6.77828
AT1G28420.1	Thhalv10006543m	11.4709	8.54075	13.2623	7.14003	9.54716	12.5103	8.6407	5.66277	12.2932
AT1G29170.1	Thhalv10006666m	6.31671	5.38749	6.56387	1.45565	3.53065	6.7397	1.19908	5.14011	7.12768
AT1G29370.1	Thhalv10006794m	28.4391	25.1839	38.5871	18.116	21.3704	32.3235	26.4787	14.3872	25.4456
AT1G29400.1	Thhalv10006838m	32.5227	39.325	30.0699	30.4383	48.4225	40.0853	86.9004	25.2599	61.3964
AT1G29750.1	Thhalv10006670m	4.87343	6.93862	6.01236	6.42893	7.05271	5.45745	5.46756	4.2906	11.9555
AT1G29800.1	Thhalv10007421m	7.24795	7.13081	3.84666	11.0364	8.5878	8.10054	9.9085	7.19256	9.88253
AT1G29820.1	Thhalv10007315m	9.64239	5.24721	11.7376	3.68938	3.37256	8.03834	5.38293	6.6863	7.31668
AT1G29900.1	Thhalv10006598m	36.6019	39.112	42.1786	18.9869	25.695	39.988	16.7747	21.8948	18.0392
AT1G29940.1	Thhalv10006599m	10.0122	10.7946	15.2114	5.93994	7.05745	13.3739	6.90805	8.46744	9.88792
AT1G30240.1	Thhalv10006813m	3.99163	4.08901	4.94401	1.59002	3.32697	5.51354	2.15846	4.28818	4.29401
AT1G30330.1	Thhalv10006747m	21.0163	21.9062	21.4225	16.8866	19.5035	21.9831	22.6516	11.3163	17.2776
AT1G30410.1	Thhalv10006559m	8.18025	8.97139	8.58432	7.06449	6.91503	21.0477	15.9783	11.0976	12.671
AT1G30440.1	Thhalv10007010m	32.065	18.8629	26.1622	14.992	12.2523	26.7615	10.4784	24.5002	20.7077
AT1G30450.1	Thhalv10006695m	12.446	8.35371	14.2145	7.19566	8.96878	12.5823	9.82201	5.34668	6.62933
AT1G30470.1	Thhalv10006836m	20.8722	18.8311	20.9686	20.2032	20.1231	17.6242	19.8642	18.3434	18.9902
AT1G30590.1	Thhalv10007103m	19.9582	19.105	15.2569	14.5549	18.4232	20.9793	18.1976	7.31533	4.15222
AT1G30680.1	Thhalv10006950m	12.2866	20.069	11.5543	9.82454	11.0628	11.188	5.98791	13.4656	12.8218
AT1G30810.1	Thhalv10006810m	3.94677	6.54971	7.36734	5.63861	7.22295	4.58253	8.86679	4.42372	8.74128
AT1G30825.1	Thhalv10008211m	8.57843	9.72889	7.54697	6.77934	5.67167	6.93268	8.78302	7.61604	10.4358
AT1G31360.1	Thhalv10006954m	4.63759	6.4289	6.70392	1.15668	2.47863	8.04247	6.72594	4.30759	5.50127
AT1G31420.1	Thhalv10007149m	36.7141	51.3441	34.4406	41.7875	34.0283	51.5027	30.0848	52.0865	49.9273
AT1G31480.1	Thhalv10006721m	5.70957	4.08855	5.51932	4.03948	2.82501	4.91209	5.50994	4.54237	5.06871
AT1G31730.1	Thhalv10006719m	28.019	20.5474	25.7272	14.8616	20.0097	26.6292	19.8718	10.9988	23.3923
AT1G31810.1	Thhalv10007385m	7.99689	6.88736	9.31362	3.86786	5.97472	6.61741	3.96612	9.30631	9.28296
AT1G31870.1	Thhalv10007193m	13.215	8.39044	10.9046	7.81496	9.41099	11.7556	8.26544	16.8787	19.0159
AT1G32150.1	Thhalv10007879m	9.70926	8.30275	8.28567	10.6138	9.01471	7.93569	13.592	8.6013	10.116
AT1G32230.1	Thhalv10007192m	90.4497	74.3426	84.831	73.2524	95.0731	111.524	143.225	53.4518	80.0176
AT1G32490.1	Thhalv10006650m	14.3322	14.474	15.9211	8.97768	8.76095	13.3742	12.4758	6.51464	9.11002
AT1G32530.1	Thhalv10006944m	15.2595	10.7688	16.864	13.5608	8.95359	15.0671	24.0088	10.7851	12.0731
AT1G32750.1	Thhalv10006532m	10.6958	8.63812	11.252	8.68861	9.46745	10.2779	12.1745	3.55174	7.23639
AT1G32940.1	Thhalv10006855m	4.50172	3.58003	3.69211	5.64643	4.41427	5.75672	6.30385	5.11246	48.0237
AT1G33050.1	Thhalv10028483m	29.4807	15.0364	7.14809	32.5788	14.6905	20.7758	96.6905	22.6289	18.5207
AT1G33340.1	Thhalv10007834m	0.802676	1.71401	1.02637	1.62432	2.72	0.98783	3.0093	2.52951	1.92663
AT1G33390.1	Thhalv10024243m	4.8296	4.38122	5.762	1.59063	3.18685	6.54644	3.10019	6.99399	13.9498
AT1G33410.1	Thhalv10006552m	10.8644	11.7394	11.2528	6.25129	9.08389	9.77425	5.70768	6.95266	11.178
AT1G33980.1	Thhalv10007455m	20.3552	17.2795	20.8384	13.9857	13.4216	18.6888	20.5345	13.3378	21.4605
AT1G34780.1	Thhalv10001824m	7.71978	12.2829	9.04396	19.092	11.2619	9.18622	7.45096	12.1398	12.2742
AT1G35220.1	Thhalv10006673m	10.6041	9.11111	11.1138	4.81321	3.69204	8.68699	4.36372	4.34412	4.96034
AT1G35660.1	Thhalv10001809m	2.17128	2.70392	2.79936	1.82006	2.63425	3.58894	2.76426	4.06452	8.00584
AT1G36160.1	Thhalv10005726m	21.0529	27.7157	26.2489	16.835	31.679	33.9026	21.7582	0.107602	10.2288
AT1G42440.1	Thhalv10011257m	17.0329	18.1078	16.4999	9.66299	12.1008	19.2278	11.018	14.034	22.2368
AT1G42470.1	Thhalv10016155m	10.8777	8.36051	7.82836	14.9973	12.8592	7.09988	8.827	8.70645	12.7787
AT1G43690.1	Thhalv10011324m	19.39	20.2846	20.6326	16.2051	16.988	18.1029	12.0547	18.8754	26.4735
AT1G43850.1	Thhalv10011234m	17.2069	18.0759	19.3896	13.63	16.5977	19.4037	21.5514	10.2868	18.8416
AT1G43860.1	Thhalv10011594m	12.297	7.29886	8.43837	7.08546	5.11804	12.6085	10.8767	16.357	21.932
AT1G45160.1	Thhalv10011200m	9.97855	13.1425	11.3425	11.2353	17.5794	14.2257	13.3935	6.94873	14.3052
AT1G47550.1	Thhalv10011225m	24.6231	15.8358	22.4711	21.8171	33.93	19.5762	22.6299	14.6344	29.0141
AT1G48050.1	Thhalv10011351m	8.96268	8.0048	8.64921	7.6028	8.91042	9.10298	8.5761	6.53757	8.16098
AT1G48090.1	Thhalv10011170m	8.62811	9.70162	10.6658	12.2403	13.5921	10.1062	13.0709	3.03484	9.22642
AT1G48110.1	Thhalv10011308m	16.185	14.5437	20.2208	12.2441	17.0259	14.759	16.3092	14.4502	18.864
AT1G48410.1	Thhalv10011196m	72.0987	55.5678	69.8822	43.3197	40.3533	63.3215	59.9083	43.5635	65.4166
AT1G48430.1	Thhalv10011337m	17.0109	18.1423	16.2723	30.5096	20.1826	32.9481	40.4617	9.21871	3.17111
AT1G48490.1	Thhalv10011190m	10.5851	7.93229	8.49635	8.7599	8.19775	10.2458	16.6221	4.47484	8.41617
AT1G48600.1	Thhalv10012068m	143.823	122.341	106.909	122.809	121.301	151.936	48.0923	9.90217	27.2915
AT1G48650.1	Thhalv10011191m	13.8271	19.3921	16.2115	9.02986	16.0291	15.2637	11.5011	11.8421	17.747
AT1G48840.1	Thhalv10011279m	9.93966	4.76166	3.76707	6.49501	11.1961	5.57903	25.0364	3.46697	5.3414
AT1G48950.1	Thhalv10011335m	10.6007	7.79858	9.4168	5.19369	7.20001	8.71783	7.57898	7.12648	7.65704
AT1G49230.1	Thhalv10011772m	6.68831	10.7274	2.83936	10.3157	15.0771	10.2887	10.8912	16.0086	6.89434
AT1G49540.1	Thhalv10011237m	7.38185	6.14843	8.9657	3.3976	3.78274	7.37766	5.32301	7.1333	8.13034
AT1G50030.1	Thhalv10022517m	12.3927	11.2672	15.1236	12.4821	12.9968	13.6007	13.7142	3.18626	9.15442
AT1G50140.1	Thhalv10011206m	10.0398	14.0451	10.1289	8.07942	9.43653	11.2427	13.7836	7.63565	12.0265
AT1G50200.1	Thhalv10011205m	62.4442	67.908	71.021	41.1198	48.2963	54.4502	53.7507	69.8528	81.1607
AT1G50360.1	Thhalv10011193m	9.36881	7.39105	10.0527	6.61073	5.10438	9.82634	10.1892	4.00144	6.24828
AT1G50410.1	Thhalv10011211m	9.40618	8.77269	10.2795	9.61942	8.34648	11.4495	12.2824	4.77812	10.7356
AT1G50500.1	Thhalv10012404m	14.4002	13.2613	17.5372	16.3248	13.7323	16.8355	12.0346	14.2026	12.2335
AT1G50510.1	Thhalv10011639m	14.4229	15.5711	10.1674	14.7562	9.82462	10.0104	17.2018	11.4878	16.8965
AT1G50660.1	Thhalv10011268m	24.0897	18.7542	20.5752	10.8991	13.0875	20.4545	11.6936	17.353	26.3503
AT1G50670.1	Thhalv10011780m	23.0217	30.4125	22.2964	22.5574	19.3762	20.2698	20.3187	25.0134	31.1319
AT1G50730.1	Thhalv10011218m	9.91048	8.54041	6.79302	8.7462	8.03431	9.01743	11.1961	5.43778	10.0044
AT1G50840.1	Thhalv10011195m	17.8571	19.1116	17.7744	13.4859	19.8128	19.9481	8.01578	24.9051	26.8639
AT1G51200.1	Thhalv10012263m	186.582	145.406	131.487	177.831	169.977	218.504	235.543	122.449	125.737
AT1G51350.1	Thhalv10011291m	7.97417	9.0291	9.50855	5.77579	11.0802	8.94899	7.71254	8.40852	11.3056
AT1G51600.1	Thhalv10011695m	9.18985	10.2894	10.4616	7.93872	7.15897	10.7089	12.9612	15.5863	18.374
AT1G51690.1	Thhalv10020527m	24.5784	29.7895	27.1409	18.8717	25.6212	21.8304	32.1373	11.0697	16.1488
AT1G51720.1	Thhalv10011312m	12.1334	14.3479	14.6904	11.5318	14.0082	12.4833	16.6348	15.6967	18.9885
AT1G51980.1	Thhalv10011412m	84.7875	72.2884	75.9506	67.3246	64.378	72.5817	64.1568	57.1354	63.218
AT1G52150.1	Thhalv10011238m	17.0089	18.0764	17.2922	5.51895	8.9666	17.2942	8.50544	14.7657	19.6005
AT1G52360.1	Thhalv10020009m	36.0154	25.03	37.7177	16.3026	22.1373	33.6106	26.2894	26.0387	40.7186
AT1G52420.1	Thhalv10011288m	21.1842	13.914	18.9199	12.2712	13.7827	23.5981	20.0444	5.19691	5.78573
AT1G53025.1	Thhalv10011411m	2.8467	1.99908	2.91983	1.2361	2.02531	2.36642	1.88447	3.06762	7.61873
AT1G53040.1	Thhalv10011374m	9.95228	14.3861	12.1116	5.48753	14.5125	12.592	8.36708	6.69378	6.85821
AT1G53050.1	Thhalv10011275m	14.3824	14.905	15.8308	7.38682	10.5259	16.4488	8.63543	10.8706	15.5878
AT1G53165.1	Thhalv10011332m	8.72867	7.26054	8.51904	6.72665	6.08904	8.80786	11.7482	7.07176	13.9989
AT1G53190.1	Thhalv10011416m	11.6366	11.7393	11.3382	9.78557	11.5932	10.7875	15.2967	7.51974	11.3005
AT1G53510.1	Thhalv10011329m	26.6666	26.8108	26.6462	20.6916	26.9203	23.7719	22.192	21.8539	27.9077
AT1G53590.1	Thhalv10011273m	10.6697	7.86636	12.172	7.1241	8.17247	8.27328	12.2205	6.99197	13.8525
AT1G53720.1	Thhalv10011414m	11.8134	9.35915	10.4357	4.00098	5.56234	9.73384	6.20588	8.68895	12.0961
AT1G54170.1	Thhalv10011331m	14.8445	13.2334	16.5955	12.3619	12.2687	14.7692	14.387	11.0243	16.7932
AT1G54440.1	Thhalv10023339m	7.89915	10.3791	7.62943	6.36427	7.58996	8.4029	5.04946	10.7137	12.0301
AT1G54490.1	Thhalv10023239m	19.7167	14.4825	20.7477	15.9127	16.4302	18.4855	18.6133	7.7868	17.4229
AT1G54570.1	Thhalv10023311m	10.0597	7.83133	8.68084	3.74317	14.2793	9.62586	7.80508	15.5218	26.1253
AT1G54610.1	Thhalv10023378m	29.2344	28.1727	28.227	21.7869	22.4697	27.0349	22.3803	23.9726	34.4871
AT1G55130.1	Thhalv10012315m	9.92232	11.8955	8.22958	5.73795	10.0009	9.15444	3.38091	3.12053	2.90928
AT1G55170.1	Thhalv10011750m	6.20432	7.52777	6.88036	3.82472	5.46918	7.44872	5.89595	4.50106	9.39767
AT1G55180.1	Thhalv10011259m	3.6888	3.53297	5.37594	2.46713	2.66952	3.74985	2.96415	3.37524	4.14231
AT1G55325.1	Thhalv10011178m	7.93738	6.74639	9.14264	6.23519	7.01618	8.75812	7.70028	3.30293	9.56574
AT1G55350.1	Thhalv10011175m	14.5667	16.563	19.5145	10.5362	14.8391	17.1216	10.1339	2.70162	8.88704
AT1G55490.1	Thhalv10011330m	289.151	563.774	364.486	189.135	182.269	271.704	64.6772	346.177	168.889
AT1G55540.1	Thhalv10011181m	5.53791	4.93928	6.31259	4.30698	5.44083	5.0291	5.09115	2.07534	4.60839
AT1G55620.1	Thhalv10011251m	8.77458	6.90071	10.503	5.50045	6.26615	8.37094	6.85124	9.21294	12.5586
AT1G55750.1	Thhalv10011333m	6.31569	6.79931	7.06784	4.80204	6.07782	5.87781	7.70184	9.5281	14.0735
AT1G55970.1	Thhalv10012306m	4.58157	3.83408	3.20025	3.85951	2.92516	5.55351	1.7112	0.043199	0.461368
AT1G56130.1	Thhalv10018064m	1.26711	1.37386	1.90599	0.884271	1.16169	1.10085	1.66667	4.12692	3.71303
AT1G56140.1	Thhalv10011215m	9.59642	4.09334	14.8388	7.98101	3.28673	11.9204	11.9303	7.15771	19.7996
AT1G56290.1	Thhalv10023321m	7.70032	5.4736	7.85835	3.24778	4.99881	8.85683	5.48952	13.1131	17.2039
AT1G56310.1	Thhalv10023373m	4.79402	6.21506	4.92083	5.25629	6.60791	5.25679	9.11743	3.60734	3.61662
AT1G56500.1	Thhalv10023228m	23.8902	51.6046	13.8843	40.5037	39.2086	18.9778	30.2912	28.1376	26.6099
AT1G56590.1	Thhalv10023492m	9.23926	11.456	11.8548	7.91128	7.80141	8.63329	11.2853	13.1603	19.6584
AT1G58030.1	Thhalv10023348m	52.8221	27.3064	43.5213	37.1293	34.8738	45.5973	58.2339	16.875	38.1433
AT1G58060.1	Thhalv10023215m	7.54319	6.80599	7.09198	5.08581	6.07766	5.71426	8.02779	2.94231	10.4395
AT1G58220.1	Thhalv10024079m	7.56231	6.12278	7.7104	5.82292	5.60554	8.19583	8.33746	2.22378	6.44575
AT1G58230.1	Thhalv10023210m	5.87285	6.01189	6.33792	5.48904	7.00035	5.75324	15.1703	3.35782	8.79399
AT1G58250.1	Thhalv10023209m	8.90567	8.28321	10.0708	6.29403	8.17155	10.3686	7.88788	7.33266	20.8907
AT1G58350.1	Thhalv10023308m	10.2837	11.9351	9.52077	6.73028	6.83608	8.21523	7.97678	3.51328	6.00639
AT1G59610.1	Thhalv10023247m	34.0798	26.04	36.6452	31.8428	29.9023	29.824	29.1703	22.3564	37.9066
AT1G59750.1	Thhalv10023326m	30.4025	27.948	28.5914	17.9171	20.1523	30.524	26.67	24.7317	29.8057
AT1G59760.1	Thhalv10023236m	14.7146	11.468	15.2903	8.34341	7.8674	15.4617	7.74129	7.30826	9.8341
AT1G59820.1	Thhalv10023222m	12.655	7.18379	10.9191	8.64738	8.50269	10.5664	13.4094	4.75134	13.3591
AT1G59890.1	Thhalv10023225m	10.1155	8.32792	11.9873	5.61116	7.71987	10.3394	7.65719	8.93186	12.9241
AT1G60070.1	Thhalv10023264m	31.6262	30.1401	31.0542	18.4171	23.3175	28.3218	12.468	11.2783	17.7604
AT1G60200.1	Thhalv10023242m	31.1698	25.8983	32.2727	20.2126	28.9811	44.804	31.8054	19.2356	23.0898
AT1G60420.1	Thhalv10023374m	24.0598	18.2281	22.8555	12.1708	14.0126	35.532	20.5577	14.7922	23.1637
AT1G60490.1	Thhalv10023282m	11.3856	15.8307	13.5107	16.7658	13.4861	14.896	31.9489	10.7825	15.6248
AT1G60650.1	Thhalv10023624m	13.4559	16.8341	19.779	6.81679	6.87444	16.8347	10.6382	16.356	13.4149
AT1G60780.1	Thhalv10007700m	46.04	48.923	49.0904	28.9856	35.3209	42.443	38.0401	22.3914	35.8561
AT1G60860.1	Thhalv10023294m	7.34909	6.32769	7.63903	5.43817	6.2149	7.59328	4.49548	3.49575	4.91594
AT1G60900.1	Thhalv10023361m	33.4896	32.9324	37.1213	26.1672	32.1766	40.9669	28.2322	19.2288	22.4532
AT1G61140.1	Thhalv10023220m	8.11987	5.04233	8.99453	6.78775	4.8416	10.2594	10.0113	5.57988	11.9574
AT1G61210.1	Thhalv10023689m	7.00979	8.20136	5.45585	4.67694	5.57805	7.21262	6.40679	14.2674	0
AT1G61380.1	Thhalv10023335m	6.30424	8.35095	11.5242	10.3082	14.2981	6.72391	20.9055	3.52534	7.57502
AT1G61690.1	Thhalv10023224m	15.0231	5.60744	10.3594	6.39974	5.9872	9.822	8.79538	5.23716	9.30817
AT1G61850.1	Thhalv10023219m	9.36798	7.86071	11.9581	5.49945	7.25457	10.8478	5.43796	2.61491	5.90712
AT1G61900.1	Thhalv10023466m	24.2542	16.6325	19.7532	18.4941	11.0835	20.7227	13.1996	20.7386	15.7441
AT1G63020.1	Thhalv10023214m	1.29273	1.65073	1.78742	1.1174	1.06454	2.02429	1.29281	6.24179	3.21046
AT1G63110.1	Thhalv10023435m	16.8372	15.6161	14.4799	17.2681	13.5266	20.1608	9.85094	14.5163	15.1536
AT1G63430.1	Thhalv10023393m	15.5492	11.7441	16.2718	11.1383	12.9857	15.89	15.4121	11.8901	7.70369
AT1G63490.1	Thhalv10023217m	7.20484	6.99783	8.49878	6.74146	7.30535	8.19301	7.21152	3.11393	7.51466
AT1G63500.1	Thhalv10023428m	24.7801	11.1475	21.7875	14.7444	9.74671	18.3987	12.7562	16.4959	31.5377
AT1G63640.1	Thhalv10027628m	7.80572	8.22246	9.21945	2.84686	3.75315	7.12475	2.57924	6.57328	8.78422
AT1G63690.1	Thhalv10023402m	30.2743	30.029	32.3258	49.0488	33.6845	29.738	38.1586	25.591	24.7915
AT1G63700.1	Thhalv10010957m	15.9444	14.0265	19.917	10.8324	12.0062	15.552	10.6909	0	0
AT1G63810.1	Thhalv10021392m	9.00413	8.87447	11.0982	4.14159	6.10581	9.47489	3.90948	6.27637	6.99756
AT1G64050.1	Thhalv10023327m	11.4034	9.78625	16.1041	10.0273	9.07349	12.7484	14.3979	10.8785	12.5436
AT1G64140.1	Thhalv10023333m	41.3235	40.4108	46.6626	28.3257	33.2812	56.0759	31.8664	24.8084	45.7866
AT1G64520.1	Thhalv10023640m	54.9196	48.6118	56.6186	55.8145	51.2882	46.9235	70.8451	85.0455	78.8268
AT1G64570.1	Thhalv10023221m	9.37583	8.29328	10.8654	6.97967	9.03952	10.0091	9.59249	1.38954	7.22665
AT1G64790.1	Thhalv10022486m	16.4151	17.6671	19.6295	14.5893	17.555	17.0507	11.9404	15.4928	31.6305
AT1G65260.1	Thhalv10018833m	114.191	172.433	92.6565	129.043	134.517	94.9817	123.272	210.391	151.669
AT1G65440.1	Thhalv10012314m	19.3207	20.7061	25.7325	17.5238	18.8717	22.3599	20.1966	4.59684	5.36068
AT1G65540.1	Thhalv10018184m	13.9739	25.6618	12.1733	21.0319	16.1461	12.9808	15.0553	10.4418	19.4716
AT1G65580.1	Thhalv10018032m	15.0452	10.561	16.5852	13.6281	18.6102	14.5451	17.0206	8.5918	14.0936
AT1G65650.1	Thhalv10018850m	20.3182	25.8955	23.666	14.4984	14.2894	19.5016	16.9018	26.5219	28.851
AT1G66340.1	Thhalv10018186m	13.6813	7.84066	12.5113	9.17707	7.54151	11.5454	12.2248	10.3113	14.3963
AT1G66730.1	Thhalv10018010m	3.73322	6.55803	4.25475	2.02694	3.54257	4.08769	2.11847	0.357286	0.180225
AT1G67120.1	Thhalv10017991m	2.99874	4.24911	4.10177	2.89193	4.38836	3.24477	2.87729	2.1755	4.92781
AT1G67140.1	Thhalv10017993m	9.84891	9.23006	8.87412	8.06338	9.38481	9.59097	7.43679	5.79343	11.0276
AT1G67230.1	Thhalv10018034m	47.107	20.4003	34.1832	18.1402	12.6169	33.1495	17.5366	19.5548	33.3139
AT1G67310.1	Thhalv10018053m	15.2749	11.1532	15.3609	15.3526	13.0498	15.7559	26.9888	6.47964	14.8358
AT1G67690.1	Thhalv10018203m	3.83297	5.93244	3.65453	2.16418	3.66222	3.59967	2.21351	7.32005	5.29336
AT1G68060.1	Thhalv10018271m	27.6897	18.7047	29.0257	11.3065	15.2275	22.5474	11.6324	14.2296	12.6841
AT1G68720.1	Thhalv10018020m	13.0052	12.4786	13.1841	8.28433	10.9412	12.8172	8.96415	9.55334	19.7183
AT1G68790.1	Thhalv10019562m	18.554	12.8663	18.9875	7.57379	9.20956	19.824	11.6417	1.16805	0.742296
AT1G68990.1	Thhalv10018073m	8.18486	10.3001	9.25283	4.45548	7.78344	9.00605	5.53909	5.84173	9.95965
AT1G69340.1	Thhalv10018352m	22.3276	21.0339	21.6231	24.4671	21.132	21.4583	28.9891	18.4014	23.7021
AT1G70060.1	Thhalv10018014m	12.0427	10.6858	13.0749	8.44711	10.2277	13.1672	12.5002	10.2663	13.926
AT1G70180.1	Thhalv10018424m	12.6779	13.1927	12.9489	12.8802	13.9363	12.4436	21.0196	6.16339	6.41926
AT1G70570.1	Thhalv10018314m	20.467	18.0226	20.0909	14.4717	15.8859	17.8948	18.7257	21.7891	20.5983
AT1G71220.1	Thhalv10018004m	20.7496	17.6579	22.8674	20.4945	22.8506	19.9881	18.9452	15.8331	36.787
AT1G71410.1	Thhalv10018097m	21.3878	13.3679	13.7741	13.0913	11.6957	20.6077	27.7017	8.77405	17.9185
AT1G71696.1	Thhalv10018610m	7.92417	7.99539	10.7735	6.52155	9.38178	9.54462	7.81076	10.223	16.4217
AT1G71820.1	Thhalv10018180m	33.3188	25.8805	34.2369	27.2837	20.5329	32.4176	36.5389	19.1613	25.6923
AT1G72190.1	Thhalv10018793m	7.61067	9.57489	5.88775	6.27449	9.98833	6.78304	9.63542	13.399	16.4491
AT1G72320.1	Thhalv10018182m	12.2582	11.2056	12.9397	7.67431	8.76889	12.8347	8.7036	8.14142	9.84695
AT1G72390.1	Thhalv10018006m	8.75502	8.37406	9.96523	7.18054	9.66651	9.60007	9.4149	3.10527	9.06605
AT1G72540.1	Thhalv10018537m	1.13117	0.920482	1.24034	0.874064	0.655396	1.38429	1.35846	1.9312	11.6417
AT1G72550.1	Thhalv10007156m	28.9777	29.1098	31.0176	21.5965	20.5823	31.1109	20.0706	41.6434	49.7085
AT1G72560.1	Thhalv10018070m	7.38063	7.04361	8.10146	4.15355	4.86442	6.75015	7.11701	3.36465	7.35994
AT1G72650.1	Thhalv10018282m	14.5445	12.4137	12.3978	14.8476	10.7337	14.0746	22.3991	7.77466	12.8211
AT1G72770.1	Thhalv10018441m	11.0541	21.3345	9.00505	3.51833	11.4431	15.8063	10.6744	13.4096	29.9387
AT1G73430.1	Thhalv10018146m	16.0244	13.5476	18.3465	10.3101	12.2566	15.4941	9.62427	8.18285	11.6104
AT1G73720.1	Thhalv10018372m	13.5129	13.2689	14.4351	10.8169	10.0416	12.8443	14.164	15.8889	13.7591
AT1G73730.1	Thhalv10018327m	8.70331	8.09079	9.57256	6.19876	7.00471	10.1493	7.5487	9.87514	9.8006
AT1G73960.1	Thhalv10018013m	11.0047	10.5825	10.129	9.69439	10.5626	11.1498	12.6613	5.21632	11.014
AT1G74260.1	Thhalv10018011m	19.7001	23.3586	25.093	12.4005	14.489	18.6925	12.0103	14.7067	11.6623
AT1G74580.1	Thhalv10018169m	4.32658	3.16406	2.76405	1.1281	2.52932	2.4647	1.62343	0.330844	1.13714
AT1G74750.1	Thhalv10018113m	5.15531	2.75804	4.4778	2.22467	2.39357	4.87885	2.33702	2.72264	6.16149
AT1G75400.1	Thhalv10018531m	13.9299	11.2944	17.1451	8.2863	10.9474	14.7465	16.9954	8.28232	8.39581
AT1G75660.1	Thhalv10018062m	24.314	20.2624	31.4968	22.5422	15.7851	28.2817	32.1665	11.3304	17.7073
AT1G76580.1	Thhalv10018054m	6.49372	5.65671	6.82658	6.5513	10.3221	7.39686	13.9777	5.69333	13.3177
AT1G77240.1	Thhalv10018371m	0	0	0	0	0	0	0	2.55822	2.36499
AT1G77300.1	Thhalv10017998m	10.4247	8.46969	11.4137	7.38906	8.97355	10.0333	8.66703	4.39073	8.75101
AT1G77310.1	Thhalv10018217m	2.22797	2.38233	1.64755	0.692842	1.20393	1.82452	0.861082	5.37522	7.54737
AT1G77320.1	Thhalv10018076m	3.91039	3.53356	3.65831	0.915624	1.38487	2.90671	0.858479	4.28101	5.49471
AT1G77460.1	Thhalv10017994m	4.25061	3.39624	5.3194	0.732882	1.42339	3.58008	2.84549	1.53015	3.85022
AT1G77600.1	Thhalv10018009m	4.14887	6.68258	3.82724	3.88205	6.24793	4.20527	4.73159	0.913908	1.30228
AT1G77680.1	Thhalv10018051m	7.86689	8.97902	7.32782	6.50144	11.7657	8.23962	11.0303	4.20447	7.24503
AT1G77800.1	Thhalv10018012m	13.7223	15.3062	13.7509	12.5517	18.2818	14.9772	11.4507	7.23971	16.5703
AT1G78880.1	Thhalv10018485m	25.7979	48.1636	21.4501	14.1537	17.274	38.5429	18.8308	11.1877	9.39449
AT1G78920.1	Thhalv10018137m	33.0526	32.7078	34.5361	31.7059	23.9799	36.6687	33.0709	15.4719	30.1906
AT1G78940.1	Thhalv10018168m	1.34884	1.37805	1.20067	0.91664	1.4646	1.32847	0.334006	0	0
AT1G79000.1	Thhalv10018000m	13.7377	11.7659	15.6522	9.27677	11.5162	16.653	13.3093	5.41563	12.8488
AT1G79090.1	Thhalv10018148m	18.633	18.0768	11.9331	11.9293	16.2851	19.2738	12.3857	8.89164	14.4292
AT1G79190.1	Thhalv10018016m	4.0953	4.37473	3.95524	2.70702	3.70293	4.33608	5.27836	2.16563	3.85795
AT1G79280.1	Thhalv10017995m	18.7371	18.0579	23.6059	12.134	14.7281	19.2487	12.8095	7.26829	18.3561
AT1G79350.1	Thhalv10000653m	14.594	13.0799	15.5891	10.5771	10.4218	15.1339	13.2024	11.0184	0
AT1G79560.1	Thhalv10018071m	26.0809	34.1344	27.3345	16.1664	16.636	18.3253	7.69031	17.5509	19.9279
AT1G79570.1	Thhalv10018023m	8.92837	10.1111	11.5354	10.4311	12.5795	10.5704	10.9212	4.97245	5.88538
AT1G79830.1	Thhalv10018077m	42.3179	32.6367	41.0557	29.51	28.6433	42.0778	32.1458	20.6608	36.6259
AT1G79950.1	Thhalv10018072m	6.18094	7.15477	8.44234	3.13194	1.78378	4.84963	3.5998	2.53384	5.00955
AT1G80260.1	Thhalv10018067m	12.9649	13.9101	11.6911	9.03784	10.351	11.8006	12.6719	5.2722	8.11669
AT1G80490.1	Thhalv10018037m	19.341	16.2422	19.8992	8.53491	14.96	15.9395	14.9315	14.9287	19.4748
AT1G80680.1	Thhalv10018057m	12.2223	10.0353	11.2777	9.23378	7.41009	12.444	10.8324	7.62174	11.8667
AT2G01130.1	Thhalv10000752m	7.47762	8.43723	7.29875	6.52771	6.7872	6.53148	8.48416	4.98642	9.19829
AT2G01270.1	Thhalv10000862m	24.8564	17.4796	26.5027	23.5849	25.0827	26.5694	29.7121	13.9813	14.0731
AT2G01440.1	Thhalv10000760m	7.60538	9.89491	8.29165	7.83147	9.24569	9.04372	9.77732	8.54987	12.8644
AT2G01460.1	Thhalv10000761m	7.37589	5.22896	8.56306	5.32	7.39128	7.79872	7.69034	4.2206	8.03006
AT2G01690.1	Thhalv10003708m	22.14	20.025	20.9762	13.6391	17.6637	21.8523	15.2179	8.05023	14.9738
AT2G01750.1	Thhalv10003816m	8.14638	9.28722	8.44267	5.09931	7.18832	8.37651	4.23344	8.74534	11.6038
AT2G01830.1	Thhalv10003561m	9.54293	8.53348	9.29522	0.898033	1.01334	3.82808	1.11462	3.57375	2.53075
AT2G01970.1	Thhalv10003877m	40.9051	34.9605	44.4999	22.6755	33.8279	45.0819	23.9279	36.3957	47.1088
AT2G01980.1	Thhalv10003547m	6.6563	5.10642	7.07925	4.84104	6.33284	8.37929	6.35637	23.6591	31.2224
AT2G02040.1	Thhalv10003893m	24.6987	15.9144	23.8843	25.8791	21.2574	27.2498	46.2136	23.7581	20.0142
AT2G02560.1	Thhalv10003535m	17.8997	16.1399	19.2748	12.6564	14.2848	18.2234	11.5474	13.7899	24.85
AT2G02790.1	Thhalv10003878m	7.13206	10.4238	9.8501	2.28959	3.50316	6.81036	4.8775	16.7686	12.8422
AT2G03140.1	Thhalv10012418m	5.58067	7.55919	5.64974	5.97531	8.5893	7.53951	5.56657	2.16017	10.5739
AT2G03150.1	Thhalv10005550m	15.3866	15.6661	18.4232	10.0074	13.7155	16.7301	10.804	8.4671	14.3277
AT2G03220.1	Thhalv10003931m	10.1735	7.41111	6.36306	4.75209	8.74595	9.29852	5.65398	8.02416	11.7888
AT2G03480.1	Thhalv10003873m	9.22989	7.22148	9.03079	2.74633	7.0484	11.2595	2.50541	7.5622	8.7603
AT2G03770.1	Thhalv10005340m	0.127153	0.139465	0.144887	0.033094	0.070822	0.208073	0.125911	0.085101	0
AT2G04030.1	Thhalv10003676m	83.0906	221.162	103.221	45.6113	95.5063	68.8478	26.3837	134.15	114.711
AT2G04235.1	Thhalv10002382m	2.22384	2.36016	2.6478	0.476089	0.460057	2.03467	0.132055	1.92755	2.80878
AT2G04270.1	Thhalv10002385m	7.9192	13.3389	7.51928	11.3702	11.5605	9.84036	11.2283	17.9982	17.478
AT2G05120.1	Thhalv10003521m	4.98993	4.23228	5.9285	2.62085	3.67024	4.9452	2.05597	6.16793	7.05975
AT2G05170.1	Thhalv10002393m	8.45853	12.0195	7.62096	6.79896	9.26727	8.85026	6.76961	7.45831	11.0587
AT2G05210.1	Thhalv10028628m	6.98178	11.2621	8.23383	6.31538	10.6125	9.10263	7.61607	1.90533	1.4412
AT2G06210.1	Thhalv10002377m	14.3942	13.2546	14.8596	11.4766	13.2193	13.1306	9.48062	19.0856	24.5504
AT2G06530.1	Thhalv10002656m	66.4201	32.1576	94.2307	69.1291	42.9646	50.4311	70.8188	46.7512	64.3192
AT2G07050.1	Thhalv10002412m	40.1155	32.8602	28.9073	28.4762	24.6079	32.4569	29.3463	21.8559	42.5399
AT2G07360.1	Thhalv10012482m	30.4275	23.2966	26.286	25.9315	21.3193	27.316	24.7794	13.1786	19.3872
AT2G11000.1	Thhalv10022576m	10.7471	8.83752	7.90041	12.6473	9.52797	11.358	14.2105	9.30158	10.1792
AT2G12550.1	Thhalv10001944m	3.66516	3.52954	4.45485	4.36401	3.76859	4.8969	7.53674	0.232678	0.31143
AT2G13370.1	Thhalv10022519m	11.9416	10.6367	16.2631	10.0908	18.2305	13.8019	15.4148	5.93848	13.9544
AT2G13540.1	Thhalv10022549m	15.0472	17.054	16.3118	10.1081	11.9277	14.0078	10.9089	18.0602	21.0389
AT2G13560.1	Thhalv10022600m	73.324	75.5237	70.4588	60.1278	54.4782	64.67	77.4609	36.6712	52.0912
AT2G14120.1	Thhalv10022566m	23.3343	17.7141	24.9507	12.7365	15.6588	20.061	20.5049	6.40168	6.47658
AT2G14260.1	Thhalv10022723m	27.6568	35.8721	29.8911	27.4165	39.2397	23.4873	32.0866	22.2219	25.7955
AT2G14680.1	Thhalv10022593m	7.61055	10.6167	8.06978	7.99405	7.56486	8.46956	7.31911	12.7911	13.7372
AT2G14835.1	Thhalv10022769m	24.0446	19.533	27.4735	18.7798	18.7234	22.4831	19.7287	9.62203	10.0518
AT2G15240.1	Thhalv10022824m	22.566	14.985	23.1466	14.3139	11.9143	20.2409	22.7364	15.803	21.3329
AT2G15900.1	Thhalv10022527m	12.8149	7.3283	10.5408	11.0482	9.78105	10.4603	25.1324	5.76876	10.8043
AT2G16485.1	Thhalv10016136m	9.47707	9.64582	14.0317	6.28267	9.02707	11.6724	7.26832	7.97522	18.0701
AT2G16640.1	Thhalv10022525m	20.3823	19.6188	20.9871	9.67164	12.4907	20.0064	17.054	9.8219	15.7833
AT2G16920.1	Thhalv10022524m	8.37054	6.05315	10.0102	4.68969	6.54886	9.32721	6.90515	5.60837	7.86006
AT2G16940.1	Thhalv10022624m	53.5764	55.7896	56.1139	47.0219	41.9406	55.9926	54.0186	35.9336	38.9614
AT2G16950.1	Thhalv10022538m	25.973	21.028	27.4538	20.4331	18.4009	24.6002	26.8701	20.8153	28.9807
AT2G17380.1	Thhalv10026443m	29.6372	23.0395	30.2491	20.9217	18.2192	27.1658	28.7909	12.3944	14.8899
AT2G17410.1	Thhalv10022553m	17.9902	16.7799	20.0251	11.9815	14.3171	18.4594	15.8168	14.6873	26.2719
AT2G17510.1	Thhalv10022534m	16.8231	14.4911	19.759	13.3322	11.5114	16.3186	21.2249	6.83252	11.8175
AT2G17580.1	Thhalv10022674m	4.801	5.38966	4.03697	2.83198	2.56727	5.92036	4.12262	2.04141	2.1407
AT2G17760.1	Thhalv10022648m	16.1645	12.4419	15.1102	14.5358	11.0146	19.1509	24.6739	11.7842	26.8934
AT2G17930.1	Thhalv10022516m	9.3209	9.2259	13.2843	9.51721	10.8705	11.2602	13.8523	3.86358	10.8457
AT2G18630.1	Thhalv10022714m	12.1248	10.2574	12.184	8.37186	7.46654	7.27708	6.64795	15.3642	18.4364
AT2G18760.1	Thhalv10022523m	2.97472	2.93825	5.49696	2.29156	2.89507	4.0302	3.41838	2.05743	4.89354
AT2G18790.1	Thhalv10019978m	18.976	18.3616	19.9339	18.7605	21.4049	29.7868	24.9349	8.56168	10.5574
AT2G18915.1	Thhalv10022601m	9.16814	7.90265	5.8183	11.2049	7.93017	7.83392	16.4371	4.02814	5.18333
AT2G18940.1	Thhalv10022551m	10.4795	16.8203	10.2211	7.00176	15.9475	11.2877	6.38561	14.0062	14.5399
AT2G18960.1	Thhalv10022531m	190.32	206.388	222.465	154.482	188.905	256.838	180.065	108.034	223.986
AT2G19170.1	Thhalv10022560m	6.09783	8.78771	6.41063	2.38221	5.7632	5.06252	1.55215	13.111	9.50912
AT2G19260.1	Thhalv10022602m	5.0919	4.36617	6.36831	3.25393	4.1928	4.42844	3.6622	3.84572	4.22168
AT2G19280.1	Thhalv10023028m	3.20223	3.89915	3.84358	1.36456	2.64345	3.8596	1.71714	2.60733	2.81427
AT2G19330.1	Thhalv10022960m	1.4863	0.389755	0.753117	1.30419	3.81581	2.21067	3.21427	1.34205	1.39733
AT2G19390.1	Thhalv10022522m	4.78522	3.76713	5.16313	2.89677	4.47082	4.0854	3.5174	1.13764	2.82951
AT2G19560.1	Thhalv10022707m	10.4512	7.66964	9.41136	8.62291	8.30086	11.4695	10.0221	9.3583	11.2056
AT2G19940.1	Thhalv10023506m	36.358	39.5404	24.6464	26.4845	33.1117	37.5525	27.9148	32.3194	26.9515
AT2G19950.1	Thhalv10001922m	12.3864	10.951	18.0369	9.26367	12.6909	15.5631	11.909	5.40974	9.22748
AT2G20000.1	Thhalv10000671m	8.85872	9.07632	8.55622	6.76971	9.19148	9.73278	8.0989	6.19257	7.99956
AT2G20010.1	Thhalv10001900m	8.19676	5.31156	8.89268	6.07853	5.74776	8.4526	7.4367	6.64614	9.84975
AT2G20050.1	Thhalv10001889m	20.073	20.5965	16.755	19.2273	18.4977	17.6521	22.4375	10.7156	13.3205
AT2G20060.1	Thhalv10002043m	27.739	31.769	26.4439	12.974	15.0595	25.8206	11.1554	27.3036	24.9004
AT2G20190.1	Thhalv10001879m	23.655	21.7997	22.6201	17.953	20.7328	22.1834	18.311	12.6076	21.6733
AT2G20210.1	Thhalv10001935m	2.78297	3.19986	2.28785	2.58304	2.2669	1.93912	5.46583	18.2245	20.6502
AT2G20290.1	Thhalv10001881m	2.50629	3.77082	4.07041	2.09564	4.69586	2.5578	1.21168	4.22989	4.3767
AT2G20300.1	Thhalv10001920m	10.274	8.55254	13.8441	5.53455	6.18121	10.5347	4.75741	6.46255	5.07568
AT2G20580.1	Thhalv10001903m	59.6759	44.955	65.3519	44.9685	52.9316	51.7236	45.0944	15.0347	20.9524
AT2G20650.1	Thhalv10002192m	4.6288	2.83338	4.66089	2.11527	3.56884	3.67067	1.62206	4.31493	6.9224
AT2G20790.1	Thhalv10003762m	12.3442	13.5525	11.2661	13.3278	8.48428	12.933	8.64345	7.99619	12.3863
AT2G21300.1	Thhalv10000043m	16.9408	17.7769	16.485	7.26887	9.13549	14.6194	5.0053	11.5346	19.2171
AT2G21470.1	Thhalv10000089m	16.2034	15.3654	15.2763	13.8696	13.7974	14.5023	16.6949	13.9944	20.2549
AT2G22010.1	Thhalv10000015m	12.611	11.5752	12.9301	15.3564	12.4438	15.071	14.3609	7.74975	14.57
AT2G22070.1	Thhalv10000053m	0.912971	1.03003	0.679708	0.32991	0.844762	0.764512	0.274245	0.855694	0.541713
AT2G22120.1	Thhalv10000252m	9.16553	8.52576	9.58479	10.1494	8.00548	10.0008	11.1202	7.92469	12.6458
AT2G22125.1	Thhalv10000007m	32.4984	19.0829	43.1627	24.1597	20.7942	27.0369	21.8029	11.9478	21.7491
AT2G22300.1	Thhalv10000026m	28.2828	11.3013	27.7745	30.3881	12.2952	19.6721	41.8983	7.91233	19.5739
AT2G22910.1	Thhalv10000095m	9.14727	11.3043	7.1326	11.7712	25.2595	12.7841	10.1624	3.61598	5.15914
AT2G23380.1	Thhalv10000037m	7.40653	6.50318	8.11248	3.62275	2.8743	5.00027	3.07425	2.6331	2.12623
AT2G23460.1	Thhalv10000039m	19.757	15.2171	20.3852	12.2053	12.3366	22.2015	15.1355	15.4729	19.9764
AT2G23700.1	Thhalv10000068m	4.40374	4.24207	4.30509	0.955539	1.16369	3.61342	1.2114	5.16461	6.38451
AT2G23740.1	Thhalv10000012m	3.85742	6.61477	11.772	4.91704	8.10722	6.31924	3.80846	6.49748	10.9682
AT2G24300.1	Thhalv10000138m	5.03173	1.15145	5.98753	1.23489	0.971176	3.10635	1.02845	0	0.165044
AT2G24530.1	Thhalv10000177m	2.91454	2.39377	2.61911	1.3721	1.78624	3.68191	2.47639	2.84478	2.84199
AT2G25660.1	Thhalv10000008m	7.95086	9.8142	9.05276	7.96696	8.44448	9.60267	8.84701	8.61118	14.8455
AT2G25730.1	Thhalv10000005m	12.3632	14.8547	12.0026	10.2226	20.6487	12.6651	20.3207	3.6052	12.8959
AT2G25740.1	Thhalv10001956m	8.25855	6.96633	8.0585	6.11777	6.01582	8.63595	8.99491	7.29372	13.9868
AT2G25850.1	Thhalv10001908m	12.8406	10.9907	10.0224	11.3692	11.2896	21.7538	15.6005	13.3974	26.1059
AT2G25910.1	Thhalv10002033m	36.5667	27.1598	42.3198	25.0711	22.4979	54.2057	26.8426	31.3065	38.7908
AT2G26140.1	Thhalv10001918m	39.6163	38.0123	32.691	25.5466	35.0848	36.4477	28.1092	34.9272	56.9675
AT2G26200.1	Thhalv10001947m	10.6479	9.41528	10.8747	11.1128	13.2938	9.38307	14.1811	15.0683	14.5928
AT2G26780.1	Thhalv10011180m	10.6481	9.45027	10.0739	9.71526	9.17742	10.156	13.5385	5.41036	12.935
AT2G26890.1	Thhalv10001876m	13.8822	12.9039	16.3839	12.3036	13.4456	17.5062	14.3817	4.95034	14.7673
AT2G26910.1	Thhalv10001880m	30.7265	29.0142	26.7965	28.4827	24.8536	31.1455	25.8272	16.5198	29.981
AT2G26920.1	Thhalv10001930m	12.1801	8.70508	11.5127	9.59399	11.4408	11.8732	13.2068	3.15611	7.04523
AT2G27110.1	Thhalv10001905m	9.39829	8.04681	9.70321	5.9359	6.69649	8.86731	8.9956	8.60125	11.1269
AT2G27170.1	Thhalv10023124m	14.6119	11.6098	16.7278	8.44721	8.84505	11.4182	11.3561	0	0
AT2G27210.1	Thhalv10001894m	10.9488	9.44406	12.6828	6.96091	8.83624	11.0004	8.12603	10.3744	15.6372
AT2G27350.1	Thhalv10001965m	18.0704	22.2902	20.2492	14.9366	18.1249	19.9399	24.315	15.5867	26.2509
AT2G27950.1	Thhalv10016236m	12.2494	15.1595	12.7611	10.2073	14.9026	16.1671	17.3052	12.2681	25.3165
AT2G27980.1	Thhalv10016165m	8.85744	10.6971	9.78764	6.03531	7.28637	9.53035	8.5019	8.1406	14.8219
AT2G28290.1	Thhalv10016121m	13.0439	12.7973	17.7263	11.151	13.3755	17.0907	14.0166	8.429	23.2504
AT2G28320.1	Thhalv10016308m	13.7297	13.683	11.5048	7.09951	9.4708	11.2332	7.32745	13.257	25.3709
AT2G28380.1	Thhalv10016679m	19.4695	19.5175	21.0087	9.78907	12.6602	20.8752	11.3697	22.679	22.8457
AT2G28520.1	Thhalv10016255m	16.0136	11.6255	12.5071	11.0719	13.9983	11.2847	12.1307	10.0153	15.9896
AT2G28540.1	Thhalv10016186m	9.70368	12.2372	11.8562	7.56403	10.7997	10.2225	9.97307	7.67365	13.8322
AT2G29190.1	Thhalv10016189m	13.2983	14.505	18.4583	7.53047	14.3061	18.2269	12.739	7.34497	13.0529
AT2G29200.1	Thhalv10016185m	7.63399	6.76769	10.9458	2.26743	4.48755	8.27101	2.80809	6.64176	10.2274
AT2G30110.1	Thhalv10016166m	46.4847	44.0568	53.7129	37.3702	44.8377	46.4092	33.7961	31.6557	49.8843
AT2G30700.1	Thhalv10016766m	16.8588	23.278	17.2378	11.6398	18.145	18.2113	14.9117	14.0856	19.0466
AT2G30800.1	Thhalv10016152m	4.6263	6.18755	4.52639	4.12091	4.53316	6.99785	6.73071	2.36035	4.51282
AT2G31170.1	Thhalv10016433m	12.0359	24.0152	14.276	13.1394	18.171	14.8313	6.57853	11.8069	8.99489
AT2G31320.1	Thhalv10016190m	5.39167	4.03421	4.19971	1.83591	2.68789	4.17302	1.35613	3.06964	4.46838
AT2G31580.1	Thhalv10016524m	6.02782	4.40145	2.69737	3.83067	4.75792	3.46036	8.01098	4.30804	6.85604
AT2G31650.1	Thhalv10016217m	3.64159	3.55575	4.64009	1.71753	1.53596	3.30772	2.31111	2.01456	1.73353
AT2G31660.1	Thhalv10016172m	21.6326	18.4658	24.4059	13.1294	17.1604	20.8809	12.1907	14.3158	18.2054
AT2G31820.1	Thhalv10016361m	18.7282	12.7125	24.7454	14.5412	11.9924	17.7888	16.2158	13.9133	30.8121
AT2G31960.1	Thhalv10016125m	20.9064	17.6307	21.4764	15.2635	20.7751	22.1288	17.1136	6.45004	16.8401
AT2G31970.1	Thhalv10016151m	6.70437	8.5127	6.37969	5.39424	6.6832	7.66954	6.64339	3.18268	4.94002
AT2G32000.1	Thhalv10016222m	9.24338	9.62346	9.674	8.05407	8.44071	10.4664	11.6392	4.01846	4.26026
AT2G32640.1	Thhalv10016422m	10.9161	21.5433	7.53956	10.5002	15.7329	9.15522	4.84194	20.6566	24.0521
AT2G32700.1	Thhalv10016303m	41.4979	34.8146	49.5309	30.1766	31.516	43.1895	37.2201	16.8787	36.8249
AT2G32730.1	Thhalv10016177m	39.4083	36.362	46.2003	28.3674	31.2456	38.6497	27.4627	30.4985	41.4219
AT2G32810.1	Thhalv10016215m	20.2916	21.0828	13.6478	21.18	22.3775	18.3326	18.8383	18.4596	11.5752
AT2G32850.1	Thhalv10016354m	17.2751	14.1546	16.5117	11.1176	15.2672	16.1194	14.5722	9.81655	13.2026
AT2G33240.1	Thhalv10016129m	0.531074	0.420225	0.576851	0.261104	0.028758	0.487881	0.076721	0.573505	0.567458
AT2G33435.1	Thhalv10016212m	8.29906	7.1399	9.86862	4.58153	5.94263	8.61321	8.01865	1.50066	5.81216
AT2G33680.1	Thhalv10017851m	2.19884	2.15452	2.44095	0.690653	1.80086	1.95797	0.747956	1.2323	1.52799
AT2G34357.1	Thhalv10016153m	12.917	13.8192	17.061	7.87582	13.678	14.6979	6.503	10.4213	16.0025
AT2G34630.1	Thhalv10016708m	22.4193	23.504	21.2765	18.5138	21.1573	18.5269	19.0013	18.5302	16.6764
AT2G34670.1	Thhalv10016345m	2.12605	2.19084	2.44586	0.541833	0.9681	2.1976	0.434994	0.862737	2.10279
AT2G34780.1	Thhalv10016158m	1.84055	6.03209	5.10838	1.21483	1.36457	2.23628	1.47012	10.8298	13.4352
AT2G34900.1	Thhalv10016753m	12.9973	12.2195	14.9401	6.31557	6.88781	14.1366	12.3482	15.6104	34.2855
AT2G35040.1	Thhalv10016407m	40.0681	51.7855	43.5303	44.5939	36.2477	39.6254	25.9806	35.1213	20.3198
AT2G35050.1	Thhalv10016154m	39.1419	33.4307	32.0043	41.8751	37.9809	32.7023	50.987	22.8991	43.2262
AT2G35110.1	Thhalv10016146m	12.6371	9.92912	17.2016	9.39183	9.02179	13.8746	9.64555	5.78228	14.2
AT2G35230.1	Thhalv10016759m	6.68691	2.13492	6.56976	6.01709	4.52688	7.1465	6.65341	2.0561	5.03589
AT2G35320.1	Thhalv10016981m	10.9348	11.103	9.66477	11.6971	9.84665	10.2449	13.5314	15.8554	15.1999
AT2G35510.1	Thhalv10016444m	21.4977	21.1766	20.4471	23.4496	19.2395	23.0894	39.0484	14.0859	20.8045
AT2G35530.1	Thhalv10016740m	10.3742	11.2593	11.0536	6.99236	8.17344	11.8147	8.72755	5.975	13.4915
AT2G35630.1	Thhalv10016124m	20.1981	15.7447	24.4439	11.312	17.1598	20.473	15.3654	8.79441	19.5548
AT2G36070.1	Thhalv10001977m	17.8348	18.9448	17.7913	8.13571	10.4059	16.8001	8.54855	15.5465	17.8047
AT2G36350.1	Thhalv10016202m	5.16243	3.08208	3.83204	2.57061	5.46515	3.98058	1.46873	4.91648	4.55357
AT2G36360.1	Thhalv10017936m	12.8684	12.6541	12.8958	13.5458	10.2337	13.9812	18.9594	7.89937	19.4949
AT2G36480.1	Thhalv10016259m	6.50733	5.70567	7.17387	5.2199	5.18306	6.40749	5.33369	5.71744	7.9411
AT2G36720.1	Thhalv10016173m	12.5388	13.4641	13.2753	10.4428	10.7223	11.2557	12.6754	10.2365	14.1278
AT2G36810.1	Thhalv10016131m	9.51672	12.9203	10.6603	9.00754	12.2852	10.5692	11.0919	6.41055	10.1459
AT2G36850.1	Thhalv10016126m	26.5637	18.4417	29.1591	17.5492	20.7147	23.5188	20.773	11.8343	23.5994
AT2G36960.1	Thhalv10016298m	6.00245	6.19689	7.84967	5.70122	7.3106	6.08253	7.96347	5.37991	12.182
AT2G38020.1	Thhalv10016232m	15.9723	13.7872	17.4942	13.843	11.7494	20.6438	21.4767	8.61657	16.1593
AT2G38040.1	Thhalv10016287m	86.904	83.8098	96.8123	69.3016	101.828	70.3962	101.174	65.9112	68.7384
AT2G38410.1	Thhalv10016346m	10.923	8.35182	10.6094	8.73371	7.86102	12.9161	12.9867	4.48895	9.30061
AT2G38440.1	Thhalv10016142m	14.3743	13.5661	15.1402	11.8252	10.9686	13.0968	14.3065	6.65775	11.7172
AT2G38770.1	Thhalv10016138m	10.8981	8.03504	12.2649	5.98936	6.80717	11.3863	9.00651	9.0702	12.8213
AT2G38840.1	Thhalv10016535m	10.4296	8.53815	9.77472	7.25687	8.59631	7.18242	8.84006	8.47292	12.8546
AT2G39260.1	Thhalv10016159m	14.4772	11.6472	15.9391	9.46602	13.643	15.6912	13.1255	7.80524	12.4438
AT2G39280.1	Thhalv10017641m	8.2497	16.8774	8.72281	5.24871	6.22276	8.74978	2.82157	2.2338	0.937045
AT2G39340.1	Thhalv10016180m	15.6918	15.5033	14.6394	13.0722	18.161	16.8418	23.1015	8.32429	13.2873
AT2G39480.1	Thhalv10016145m	10.624	6.19591	9.5181	8.9536	6.26592	11.6283	10.1992	7.98354	13.7866
AT2G39580.1	Thhalv10016135m	15.2329	12.8835	14.3394	10.1694	12.6196	29.6265	16.5447	10.3569	23.3767
AT2G39740.1	Thhalv10016564m	7.80462	11.7434	7.19189	26.0597	5.22585	9.75114	14.6198	4.08665	12.9866
AT2G39810.1	Thhalv10016197m	11.5242	12.8207	14.519	7.97742	14.2594	11.5083	11.082	7.37341	10.0488
AT2G40030.1	Thhalv10016128m	2.85549	3.56101	2.33384	1.41991	1.78213	2.97105	1.17736	6.9077	8.25953
AT2G40730.1	Thhalv10016269m	31.2371	20.9651	35.0651	19.7001	21.2163	28.164	18.0233	10.086	17.2896
AT2G40770.1	Thhalv10016132m	5.09633	3.73576	4.65696	3.09132	3.94076	4.42397	4.1885	1.67672	4.31069
AT2G40980.1	Thhalv10016332m	9.79261	7.74075	8.06345	5.99057	6.49556	8.06044	6.56561	6.95522	8.3255
AT2G41220.1	Thhalv10016134m	30.0798	11.0768	29.0359	10.4008	9.79035	23.9123	8.22055	8.27912	23.6099
AT2G41500.1	Thhalv10016457m	10.8194	8.55599	12.8883	6.32096	6.66408	10.7429	14.2835	6.14975	6.10944
AT2G41520.1	Thhalv10016164m	6.88831	6.60784	7.71327	3.12766	4.86074	7.11636	3.98963	2.83525	5.91103
AT2G41700.1	Thhalv10016127m	18.9459	7.83788	19.0827	7.88435	6.83377	31.2591	18.8787	3.3169	11.8257
AT2G41960.1	Thhalv10016156m	12.7532	9.76285	15.0943	6.64954	8.77806	11.384	9.06121	4.50049	10.5996
AT2G42270.1	Thhalv10016123m	7.071	7.74699	6.54129	2.8814	10.5962	9.80199	6.23345	1.60246	4.65252
AT2G42520.1	Thhalv10016388m	19.2852	19.785	22.1577	17.3352	19.7134	19.7358	18.94	15.4397	23.3052
AT2G42600.1	Thhalv10016192m	111.852	208.749	81.407	163.755	165.683	97.4728	78.3456	171.666	357.84
AT2G42700.1	Thhalv10016247m	9.42379	6.68167	8.30742	4.57189	8.09294	8.79207	6.55161	6.32083	10.0592
AT2G43040.1	Thhalv10016328m	3.47682	1.07279	3.70221	0.706887	0.905728	2.83295	0.184271	1.4374	2.2364
AT2G43330.1	Thhalv10001407m	11.6396	13.1327	8.66635	21.8813	20.438	9.71982	24.3321	8.45533	17.3317
AT2G43410.1	Thhalv10001307m	8.39762	12.7327	11.6436	8.6111	6.92485	11.6617	8.30021	5.12678	6.39525
AT2G43490.1	Thhalv10001327m	8.37998	5.35083	4.69875	4.25218	7.49895	8.63895	3.7963	6.94603	14.1047
AT2G43900.1	Thhalv10001286m	6.55892	8.5337	11.8965	3.68163	6.14708	24.6575	12.3439	2.06903	2.60976
AT2G44710.1	Thhalv10001313m	13.7965	15.5067	16.182	10.7281	13.9247	17.3548	11.827	10.0479	14.8688
AT2G44900.1	Thhalv10001300m	11.6037	7.41255	6.83625	7.55043	7.62986	10.0979	10.5094	3.81114	6.44982
AT2G44950.1	Thhalv10001306m	9.8148	9.76434	9.68146	6.64621	8.28402	9.62333	11.0067	8.24304	13.2913
AT2G44970.1	Thhalv10001413m	15.7282	14.8934	15.3333	14.9803	10.7192	14.7018	15.0541	12.6152	12.7682
AT2G45540.1	Thhalv10001277m	16.7164	14.7228	19.0873	11.6538	13.248	17.4007	17.5712	4.198	14.1456
AT2G45910.1	Thhalv10001310m	11.0197	7.52994	10.741	10.0973	9.46782	11.393	25.2724	5.41987	16.8673
AT2G46020.1	Thhalv10001280m	17.1812	15.3057	17.2553	11.4179	13.8644	16.6776	18.3089	5.10132	16.1492
AT2G46560.1	Thhalv10001279m	11.954	10.2302	12.2952	10.7568	12.6523	10.6152	13.674	3.12554	7.08041
AT2G47210.1	Thhalv10001452m	15.7845	17.7635	15.3338	13.3298	9.72352	9.94347	11.6103	16.2581	18.3369
AT2G47350.1	Thhalv10001400m	5.67244	4.36672	4.52257	4.09561	4.95442	6.25877	6.2296	7.48581	12.7179
AT2G47390.1	Thhalv10001294m	49.4104	71.7365	48.2903	48.4284	62.7968	46.0299	47.3652	29.2884	34.9526
AT2G47410.1	Thhalv10001281m	12.1456	9.74698	11.7373	9.45143	11.193	9.57639	12.2739	4.59994	9.90226
AT2G47980.1	Thhalv10001288m	19.0379	15.3394	19.8986	10.9815	11.9592	16.8788	18.273	42.9307	16.8924
AT2G48060.1	Thhalv10001278m	6.4263	6.97246	6.99733	5.83702	8.92371	6.86847	7.98476	3.32633	8.64014
AT2G48110.1	Thhalv10001284m	7.0157	6.57154	8.15717	5.83847	6.18837	6.79451	6.50351	8.21765	10.2176
AT2G48160.1	Thhalv10001283m	16.4091	15.1605	21.612	12.8997	16.9012	17.2601	14.9104	11.2582	21.6268
AT3G01040.1	Thhalv10020487m	9.16574	6.14387	5.7036	8.27925	6.72383	7.55372	6.90739	10.1939	18.427
AT3G01090.1	Thhalv10020553m	20.8883	24.9474	18.4119	20.7159	25.2192	18.4692	27.0979	18.8248	24.046
AT3G01320.1	Thhalv10019899m	8.99602	8.85874	10.8036	7.26756	7.46052	9.85815	8.82857	5.85733	12.7528
AT3G01460.1	Thhalv10019872m	5.50228	4.13636	6.50681	3.44951	4.21341	5.32724	4.75105	2.76009	5.87663
AT3G01540.1	Thhalv10020294m	99.339	83.9097	110.22	86.5495	73.5558	103.714	126.585	91.3427	132.073
AT3G02260.1	Thhalv10019869m	13.7789	11.6621	16.6743	11.6048	15.1235	15.3562	14.2638	6.59745	17.675
AT3G02300.1	Thhalv10020658m	22.7944	30.3445	25.3557	28.8689	32.9632	31.5955	24.8258	10.0711	13.7416
AT3G02660.1	Thhalv10020578m	14.2602	25.9267	12.98	9.97554	18.5354	10.2322	6.227	18.8702	16.9442
AT3G03060.1	Thhalv10020284m	4.86853	5.36989	7.43808	1.26418	2.36772	5.93771	0.609948	10.2706	4.98791
AT3G03090.1	Thhalv10020565m	8.588	11.3765	6.98516	15.2886	11.0565	7.34997	9.44136	11.7601	12.5925
AT3G03140.1	Thhalv10020126m	4.74726	3.43695	4.27809	2.1829	3.4051	5.17023	3.04276	3.97716	6.86715
AT3G03380.1	Thhalv10021119m	30.7892	21.5433	31.5714	22.3423	20.0446	31.0419	34.7666	0.685839	1.39525
AT3G03570.1	Thhalv10020333m	9.55058	7.76934	9.29594	6.04833	6.28276	9.68229	8.62156	7.01579	12.5546
AT3G03710.1	Thhalv10020014m	26.1584	37.0829	29.1473	19.4827	22.8035	22.148	15.7047	33.958	34.3088
AT3G03810.1	Thhalv10020245m	5.66928	3.73976	5.7813	4.88425	5.673	6.57017	4.95604	5.00844	7.18787
AT3G04240.1	Thhalv10019996m	26.7465	28.2861	28.0662	23.3778	28.4632	31.9393	33.0526	18.0578	46.4272
AT3G04260.1	Thhalv10020015m	21.0518	38.1078	29.0754	18.3921	24.6918	25.2275	19.5979	32.4473	33.7135
AT3G04470.1	Thhalv10003783m	28.3672	19.1027	23.4822	12.5913	13.1217	26.8415	24.62	37.5674	29.4289
AT3G04480.1	Thhalv10020155m	10.9227	14.1344	10.8424	17.1601	11.4576	10.0494	22.5956	6.9953	9.55899
AT3G04490.1	Thhalv10019943m	10.2667	8.95443	11.9795	9.26931	8.50741	10.101	14.2046	5.05407	8.30543
AT3G04740.1	Thhalv10019885m	8.55847	5.48171	8.73855	5.94264	5.31401	8.15343	12.2446	3.94483	8.92488
AT3G04810.1	Thhalv10020328m	15.0775	14.9059	13.0576	4.51924	7.23067	14.2426	6.32975	7.30821	7.71533
AT3G05040.1	Thhalv10003536m	6.91927	5.59543	6.94736	3.56025	5.39726	5.83011	4.77002	2.77258	4.04527
AT3G05090.1	Thhalv10020130m	17.9266	13.2316	18.0972	15.7686	14.1218	19.6531	20.9759	11.2947	20.9078
AT3G05380.1	Thhalv10019971m	8.6516	7.66576	9.66827	6.65529	6.27168	10.2223	12.4486	5.94728	7.86527
AT3G05480.1	Thhalv10020753m	0.95557	2.28893	0.911443	0.268568	0.377762	0.697265	0.133842	0.647977	0.603494
AT3G05670.1	Thhalv10020032m	13.4832	10.2302	17.4823	6.98764	7.7996	15.8874	8.94228	6.48365	14.631
AT3G05675.1	Thhalv10020747m	3.31362	2.93524	2.88357	1.9955	2.11467	2.94589	3.88779	7.17577	4.36204
AT3G05680.1	Thhalv10019873m	9.02884	9.11712	12.0401	7.17601	7.28947	9.26741	8.97981	2.81998	6.65936
AT3G05850.1	Thhalv10003694m	7.33021	5.91746	6.13779	4.93545	4.86736	7.91836	6.8008	3.9803	5.08418
AT3G06290.1	Thhalv10019892m	7.99309	8.35284	9.08241	7.47375	8.82478	10.3013	10.486	3.21375	5.60829
AT3G06400.1	Thhalv10019967m	38.9948	28.0469	32.944	17.226	22.944	38.5216	31.1079	20.872	30.8634
AT3G06510.1	Thhalv10020302m	25.7528	74.7611	23.7514	43.1753	78.1234	33.8082	28.8095	41.699	67.5411
AT3G06530.1	Thhalv10019871m	6.4683	8.05829	11.2691	3.52309	6.32966	8.33928	3.80693	6.25728	10.6743
AT3G06670.1	Thhalv10005268m	23.5793	21.1717	20.3596	19.2407	20.6288	20.2437	25.6751	5.41945	8.80126
AT3G06920.1	Thhalv10020026m	2.79194	2.78542	2.80406	1.78752	2.496	3.40464	1.58724	1.05064	4.72328
AT3G07100.1	Thhalv10019975m	37.1397	28.0141	34.9363	21.7595	29.5448	34.0484	31.4919	14.3318	22.8032
AT3G07160.1	Thhalv10019878m	27.1729	23.2862	30.1091	23.3014	26.0969	26.2356	26.835	9.12172	24.6504
AT3G07400.1	Thhalv10019992m	11.5207	7.73806	9.6738	8.6489	7.76342	9.29487	10.1753	8.58634	8.40878
AT3G07660.1	Thhalv10020055m	18.1216	14.4562	19.0903	11.8651	15.3033	18.3439	20.0208	11.7504	14.2494
AT3G07740.1	Thhalv10020436m	7.6518	7.26565	5.6244	5.47719	6.76644	7.81825	8.68614	8.88187	9.57102
AT3G08530.1	Thhalv10019886m	65.4778	48.0567	81.326	44.599	45.9507	71.2781	58.6417	21.9321	30.2231
AT3G08650.1	Thhalv10020349m	14.2335	15.103	25.6114	36.3531	12.3947	33.2322	34.6781	8.40281	12.6327
AT3G08850.1	Thhalv10019904m	19.5742	16.5147	21.9828	20.6176	17.3732	21.4246	23.6505	6.80509	12.4299
AT3G08960.1	Thhalv10019980m	10.8967	8.62985	11.97	6.38194	7.62621	9.34733	8.40366	4.54145	8.57076
AT3G09360.1	Thhalv10011362m	7.57954	5.88592	8.00143	10.6419	4.86389	7.72716	5.74907	1.83243	1.31609
AT3G09920.1	Thhalv10020082m	8.59288	10.9472	8.91887	11.6518	11.5327	6.67436	17.8266	11.1412	22.1663
AT3G10160.1	Thhalv10020301m	17.8338	31.0688	18.9206	15.0394	26.96	18.4479	11.438	22.5577	25.8312
AT3G10180.1	Thhalv10019913m	1.62844	1.33139	1.83864	0.159354	0.426901	1.22406	0.338909	1.26541	1.01851
AT3G10380.1	Thhalv10019960m	27.5239	19.4468	28.0777	23.189	19.2311	28.9506	26.4736	9.60693	21.4427
AT3G10390.1	Thhalv10020007m	7.79877	7.68865	8.68603	3.71949	6.29409	7.47082	4.71237	2.86437	6.48163
AT3G10690.1	Thhalv10020005m	16.4439	27.949	20.8129	9.51683	8.92769	13.1005	4.35232	19.2106	18.2416
AT3G10740.1	Thhalv10020209m	30.431	22.0048	28.2704	27.2716	21.7565	21.4137	49.6758	38.2812	62.9198
AT3G11130.1	Thhalv10019884m	74.4054	43.66	78.6895	42.1073	37.3459	66.6718	47.9578	29.5413	60.7675
AT3G11450.1	Thhalv10020260m	41.1704	24.2976	39.7241	22.7418	19.2876	42.7189	41.7727	13.086	14.5976
AT3G11760.1	Thhalv10020165m	7.91865	3.62895	7.32456	2.00609	1.58537	6.88106	3.48498	7.02964	4.71559
AT3G11964.1	Thhalv10019877m	9.67937	11.3547	12.6179	5.07705	8.83272	9.83021	6.87132	9.03162	13.8244
AT3G12010.1	Thhalv10020623m	14.16	21.2183	18.6623	15.7362	15.1656	18.2084	11.7319	23.4144	21.5275
AT3G12080.1	Thhalv10020226m	40.9777	54.172	37.6724	44.0244	41.0404	38.1281	38.014	23.983	21.844
AT3G12280.1	Thhalv10019977m	11.6072	13.6146	13.3276	8.41157	9.1514	13.8559	12.6935	7.86464	13.5603
AT3G12340.1	Thhalv10027735m	3.95839	5.0482	4.78194	1.10923	2.18955	4.3677	1.70193	4.27686	5.82819
AT3G12590.1	Thhalv10019927m	8.49607	5.77511	9.20595	4.87977	6.09465	7.55321	8.79673	4.39164	8.32913
AT3G12810.1	Thhalv10019875m	6.04334	6.34836	8.55827	3.96642	6.2297	7.57041	7.34598	4.07456	6.15942
AT3G12980.1	Thhalv10019887m	7.61818	5.7066	9.69531	6.94511	8.0459	9.66927	9.32192	2.07112	5.78921
AT3G13060.1	Thhalv10020281m	26.3796	18.9182	26.0643	26.1513	24.3916	22.4893	36.917	13.5294	29.4761
AT3G13225.1	Thhalv10020110m	8.56965	8.34444	9.05185	6.31295	10.9244	10.458	16.9752	11.992	18.5442
AT3G13330.1	Thhalv10019881m	13.4938	11.0114	15.7102	20.2907	13.6996	14.6957	27.425	10.7368	35.2882
AT3G13530.1	Thhalv10019926m	7.62851	4.81575	6.80943	5.43888	5.07286	6.57556	6.56669	11.2905	15.6709
AT3G13690.1	Thhalv10020139m	17.6292	20.3276	17.3677	21.5331	22.325	26.5203	32.4181	16.7471	14.8337
AT3G13870.1	Thhalv10020092m	54.3548	44.9501	41.9854	39.0505	45.9996	45.1228	53.2995	26.9816	42.4296
AT3G14010.1	Thhalv10020519m	26.5711	20.4019	23.4915	20.4426	19.1162	25.9043	28.6431	10.9223	16.1446
AT3G14075.1	Thhalv10020264m	8.46795	8.15358	9.35284	8.0069	5.04268	6.19215	12.4212	4.66343	7.19537
AT3G14120.1	Thhalv10019957m	9.21119	9.88052	10.9955	4.50153	6.31232	9.44904	5.26632	5.04557	9.50973
AT3G14790.1	Thhalv10020227m	16.938	12.5904	17.2654	5.61864	8.99403	15.0444	8.60248	11.4131	9.44647
AT3G15120.1	Thhalv10019880m	4.63093	4.1587	6.3747	3.26359	4.9048	5.08123	4.85443	2.86822	9.49066
AT3G15220.1	Thhalv10022019m	11.4201	9.43863	10.3112	8.34007	9.76623	11.3756	9.29362	4.26381	7.35506
AT3G15380.1	Thhalv10020171m	13.7611	14.609	14.3104	9.95301	16.3048	13.8611	10.368	8.25395	11.4266
AT3G15880.1	Thhalv10012501m	21.4679	25.7869	18.7203	14.9804	18.7546	18.4356	10.937	6.53145	11.6226
AT3G16170.1	Thhalv10020466m	14.8706	9.00781	14.001	6.51398	10.2034	15.1057	7.58184	9.4606	11.4616
AT3G16260.1	Thhalv10019999m	10.7624	14.9399	13.0409	12.7001	12.7933	10.2963	9.49917	9.91858	12.8325
AT3G16270.1	Thhalv10020187m	18.087	12.9465	16.2656	13.4727	15.6968	14.6766	18.2938	10.8866	17.4452
AT3G16290.1	Thhalv10020028m	27.6031	44.4787	30.9601	19.3484	30.6167	27.6849	11.3477	29.5807	36.9243
AT3G16650.1	Thhalv10022263m	2.06165	1.97745	7.10748	5.98841	2.94723	3.57262	1.15325	0	7.64374
AT3G16785.1	Thhalv10019948m	10.5164	7.70529	9.57427	8.89785	8.66923	10.9959	15.1673	5.24323	12.5564
AT3G16830.1	Thhalv10019939m	23.0579	16.9366	23.6381	15.3223	11.9098	24.7029	26.9576	6.32891	17.7059
AT3G16840.1	Thhalv10020025m	17.2484	17.6132	19.2091	8.61	11.906	16.9113	11.5601	9.09656	7.82158
AT3G16940.1	Thhalv10020047m	17.0819	14.0073	12.9608	14.9457	18.9135	15.154	20.25	9.21048	30.047
AT3G17205.1	Thhalv10019984m	15.364	13.5825	10.9874	14.0684	15.2303	14.0703	21.7658	9.66395	24.8757
AT3G17630.1	Thhalv10020094m	1.45116	1.53593	1.69717	1.15857	1.84746	2.6425	1.28786	1.83072	0.466126
AT3G17740.1	Thhalv10019937m	5.54505	4.99864	6.86416	4.71825	5.88692	6.49659	5.21699	3.22089	5.62587
AT3G17750.1	Thhalv10019940m	9.21759	9.24738	10.3588	8.60482	11.3648	9.49784	9.06397	5.02573	8.2007
AT3G17850.1	Thhalv10019909m	23.4595	18.1112	21.3348	17.5981	17.7088	19.7825	20.153	6.9399	12.6885
AT3G17900.1	Thhalv10020058m	16.4166	13.024	15.204	8.97265	11.6613	15.0763	13.813	8.85377	14.4547
AT3G17920.1	Thhalv10019973m	7.84473	5.20625	5.85127	6.11576	5.29935	4.97583	5.73199	2.39041	4.07803
AT3G18040.1	Thhalv10020306m	14.447	12.5416	15.1506	7.54323	11.0696	16.1132	8.48167	5.61972	8.47348
AT3G18290.1	Thhalv10019915m	42.589	29.5033	16.7733	28.5941	19.3313	22.3119	27.5365	13.1941	40.4044
AT3G18350.1	Thhalv10020186m	5.1423	4.78525	6.35984	5.0486	5.78248	4.97853	6.46969	6.94494	7.31324
AT3G18480.1	Thhalv10020192m	16.1331	14.0863	15.0285	10.5582	13.4227	14.8659	12.7708	10.1094	15.5531
AT3G19190.1	Thhalv10019879m	8.72558	6.30787	7.97806	9.74017	6.84444	8.31171	17.8739	3.25892	10.527
AT3G19510.1	Thhalv10022305m	6.29464	6.14332	7.72732	2.53388	3.17643	6.31037	6.79803	6.05633	9.03159
AT3G19670.1	Thhalv10019995m	13.3949	11.3768	9.44633	9.64601	9.89337	11.9387	12.2401	5.13324	10.2121
AT3G19780.1	Thhalv10019965m	4.91198	4.68076	5.29749	3.84684	5.70596	4.73205	5.36552	3.58254	6.83097
AT3G19830.1	Thhalv10020191m	7.17776	10.5412	7.81966	12.5592	9.1817	7.03328	4.99804	8.05149	11.5018
AT3G19840.1	Thhalv10020134m	7.36083	6.74699	8.15392	6.76635	6.76018	8.05108	7.79923	6.3419	7.96787
AT3G20010.1	Thhalv10020061m	5.38955	6.10813	4.64949	2.55653	3.73093	5.45985	1.61258	2.67941	4.09552
AT3G20250.1	Thhalv10020002m	16.1139	8.59577	14.3286	15.2273	12.6177	20.0625	33.2955	11.9889	28.3527
AT3G20440.1	Thhalv10020019m	2.97675	7.06978	3.4436	3.24429	4.278	2.81447	2.43622	7.25883	7.40603
AT3G20650.1	Thhalv10020966m	12.0258	8.92277	12.3103	7.95501	9.02824	11.7013	9.18353	15.1626	20.6023
AT3G20720.1	Thhalv10019934m	7.74704	7.61913	8.20449	6.55112	9.67243	7.19721	6.5094	4.37358	8.15534
AT3G21175.1	Thhalv10020970m	16.6819	13.3816	16.0195	14.173	13.9407	16.5464	23.2921	14.4172	16.4865
AT3G21290.1	Thhalv10019924m	6.26612	5.12906	6.29445	3.33079	5.13593	6.0799	5.82325	4.9496	8.78906
AT3G21295.1	Thhalv10020246m	4.10195	3.62671	4.38007	3.28109	3.11259	4.30148	7.92815	4.4327	7.88511
AT3G21480.1	Thhalv10019982m	3.67489	3.07389	4.08462	1.58899	1.3554	3.63468	2.59944	3.65296	5.31192
AT3G21540.1	Thhalv10024329m	7.00946	7.10005	9.55141	2.53953	3.22868	8.88504	2.88642	12.5187	8.87573
AT3G22170.1	Thhalv10020053m	20.1993	17.1797	22.2169	17.9903	16.009	18.0207	30.2386	12.4008	18.78
AT3G22180.1	Thhalv10020167m	4.37006	3.289	5.2442	3.87128	4.71717	4.56956	6.0636	6.11139	6.20668
AT3G22270.1	Thhalv10020108m	8.24582	9.53821	9.74316	6.86917	9.02684	8.42913	8.17819	5.27098	8.17071
AT3G22520.1	Thhalv10020335m	17.4959	19.2775	14.1494	12.4527	13.9515	18.0512	11.6058	48.9894	55.9803
AT3G22780.1	Thhalv10020174m	15.3401	21.3734	18.3063	7.9235	8.38957	18.7	7.55386	22.9016	24.1379
AT3G22790.1	Thhalv10019883m	7.78104	6.13845	7.59976	1.61343	3.16128	7.30565	1.00565	7.13728	8.82742
AT3G23310.1	Thhalv10020434m	18.3387	17.4639	13.8266	12.8373	13.6517	14.4802	9.91758	10.1191	12.0164
AT3G23540.1	Thhalv10020399m	12.8047	9.96827	12.2372	8.76203	10.2352	14.7372	14.0727	4.7703	9.29677
AT3G23590.1	Thhalv10019912m	14.2615	8.70389	16.2343	7.24854	8.42946	12.6098	8.74351	2.17103	6.29573
AT3G23780.1	Thhalv10019931m	8.28171	8.90291	8.53986	5.66891	6.41784	9.31071	5.27098	7.98469	10.4466
AT3G23790.1	Thhalv10002419m	6.61853	3.21345	10.9236	2.83027	1.87258	12.0297	6.64279	6.86895	8.83111
AT3G23900.1	Thhalv10002398m	16.8746	14.0411	16.8128	9.12778	10.4869	15.6071	11.9311	9.47955	10.93
AT3G24180.1	Thhalv10020003m	15.6958	20.5673	21.7169	16.2235	13.453	20.998	25.0439	6.23007	13.8799
AT3G24190.1	Thhalv10002400m	26.2346	42.144	16.8262	20.5152	47.1354	15.9285	15.3618	30.6364	51.1366
AT3G24320.1	Thhalv10002376m	3.22736	4.14886	4.48632	1.95155	1.7954	3.74953	1.69182	2.98289	2.79751
AT3G24740.1	Thhalv10002596m	15.3858	13.6539	8.03496	8.61858	11.6926	19.0141	18.986	13.2512	21.1121
AT3G24880.1	Thhalv10002368m	5.62503	5.40058	6.8083	3.85082	4.72934	3.98922	6.43637	2.83918	8.73528
AT3G25545.1	Thhalv10004778m	14.237	9.85439	9.60772	7.07287	9.8752	11.2663	7.07642	19.1345	15.0016
AT3G25680.1	Thhalv10003928m	11.198	13.1878	9.71552	7.85886	12.3229	11.9365	7.4725	18.2819	16.5889
AT3G25840.1	Thhalv10003622m	26.455	20.7232	24.5436	20.8937	27.0471	41.2256	22.1595	11.9466	27.7205
AT3G26560.1	Thhalv10028287m	14.9659	12.8847	16.5952	7.79502	10.2557	17.36	10.5471	0	0
AT3G26910.1	Thhalv10003842m	9.38421	4.03102	12.2811	5.43821	2.88342	7.9968	6.85213	3.76967	8.98258
AT3G26935.1	Thhalv10004226m	25.1434	20.5461	27.7598	16.0184	20.1907	20.3136	19.9277	18.9477	19.1013
AT3G26990.1	Thhalv10004010m	8.3189	5.92255	7.8457	3.9472	5.6376	10.8337	5.69736	5.60539	7.26507
AT3G27000.1	Thhalv10004377m	5.454	5.45952	4.8359	4.63509	3.96015	4.66937	7.59215	11.5853	16.4625
AT3G27260.1	Thhalv10003722m	9.98517	12.9153	12.0554	9.42117	9.26806	11.4061	16.7761	12.2854	24.3028
AT3G27325.1	Thhalv10003555m	9.85783	9.98308	10.7664	5.99183	8.14978	9.7382	8.14216	4.32695	8.44806
AT3G27470.1	Thhalv10004352m	6.80794	6.54325	5.33469	5.20523	3.41488	8.19342	6.22249	3.60565	7.02192
AT3G27530.1	Thhalv10003626m	16.2607	14.6263	15.1235	12.5933	12.453	13.9618	11.8204	11.2658	12.5528
AT3G27670.1	Thhalv10003508m	6.66693	5.13584	7.87296	4.53561	6.35856	5.30821	6.9852	4.8666	6.24108
AT3G27700.1	Thhalv10003632m	7.1639	6.28022	8.27859	4.8627	6.23398	7.54646	7.68002	5.93397	7.01481
AT3G27740.1	Thhalv10018601m	39.0615	50.7064	47.6184	22.7442	24.2877	41.3615	21.0628	69.845	71.6544
AT3G28430.1	Thhalv10022546m	7.6619	6.66973	8.10698	6.11025	5.97724	8.24904	6.32148	6.90326	11.1501
AT3G28670.1	Thhalv10004086m	8.15077	10.3966	10.6845	8.97813	9.33048	10.7657	11.5805	8.85664	8.19212
AT3G28760.1	Thhalv10004593m	6.95905	15.4327	6.88816	5.79094	10.4957	6.93662	2.30529	26.6062	19.0658
AT3G29160.1	Thhalv10004026m	21.9798	20.9303	20.5819	16.4631	18.8764	13.8316	26.0299	12.0058	21.9312
AT3G29180.1	Thhalv10028198m	23.6626	20.0116	36.4042	4.59125	7.40065	21.4889	7.09711	0	0
AT3G29270.1	Thhalv10005526m	15.955	14.0052	12.5101	12.084	12.6104	16.8156	23.7133	19.0594	29.5571
AT3G29290.1	Thhalv10003982m	2.99547	10.1231	3.45601	4.32106	5.6504	9.28756	3.70399	2.73493	2.70244
AT3G29390.1	Thhalv10003901m	23.6874	26.7572	33.6566	22.66	14.1624	22.0795	29.6399	11.2149	23.7596
AT3G33530.1	Thhalv10011188m	11.5272	19.4929	24.4715	15.6426	15.5087	15.2094	16.6959	5.34383	9.68947
AT3G42050.1	Thhalv10025183m	95.9686	106.813	108.935	99.1771	100.974	101.966	73.1106	115.4	159.652
AT3G42950.1	Thhalv10002498m	7.83383	6.61684	8.8425	3.66051	5.08058	7.54396	3.62846	7.694	3.33366
AT3G43230.1	Thhalv10002509m	19.8812	16.3953	18.0278	24.9532	16.6395	23.4583	49.8739	13.4064	26.8481
AT3G43240.1	Thhalv10002415m	13.8988	11.9549	12.7623	9.76788	11.4971	12.4732	10.8601	17.6038	25.4048
AT3G43300.1	Thhalv10002369m	26.2264	19.2393	31.9068	24.6104	21.3327	21.9054	32.9128	17.43	36.0185
AT3G43610.1	Thhalv10002374m	8.00893	12.0594	11.6808	7.30205	8.96924	6.61201	5.32321	6.20967	8.79573
AT3G44340.1	Thhalv10010084m	23.0472	22.917	26.8623	18.0777	20.9499	25.4892	15.2892	10.0647	16.3518
AT3G44530.1	Thhalv10010089m	3.70044	3.72556	5.51795	3.85732	3.71932	4.41047	4.23583	4.97275	8.88169
AT3G44680.1	Thhalv10002540m	5.97551	9.44786	8.57385	3.39022	2.84625	5.79771	4.21289	10.5386	11.209
AT3G44730.1	Thhalv10002379m	6.59271	2.98671	6.13172	0.931987	2.12062	3.85591	2.63713	2.78748	2.96491
AT3G44890.1	Thhalv10002672m	163.237	327.105	189.996	157.696	127.222	172.805	84.9532	374.959	216.525
AT3G45090.1	Thhalv10002416m	10.1983	6.95716	11.5432	3.29866	4.5918	10.9789	4.0087	9.10534	9.16514
AT3G45190.1	Thhalv10002405m	20.672	19.827	25.1256	18.4051	17.1223	24.3078	21.7794	20.3599	26.3828
AT3G45830.1	Thhalv10002373m	6.2365	4.9847	7.40855	4.50028	4.74841	6.75832	6.5535	4.27026	6.93079
AT3G45850.1	Thhalv10002384m	21.4156	20.6701	22.6986	14.9176	17.3061	20.4536	10.2905	18.6737	15.9898
AT3G46290.1	Thhalv10002401m	13.0222	10.6207	9.95476	12.9013	14.118	12.0481	11.2963	17.9639	20.7634
AT3G46510.1	Thhalv10002430m	31.9086	15.9741	21.6708	28.5666	11.8352	22.8922	57.7343	20.0254	30.063
AT3G46590.1	Thhalv10002472m	25.0796	40.0175	27.0031	31.92	39.3883	27.8043	39.9088	19.6349	47.2505
AT3G46610.1	Thhalv10015672m	6.94705	10.2586	7.53754	7.86548	8.07935	7.81128	4.73378	13.8159	17.1915
AT3G46960.1	Thhalv10010069m	6.88133	7.5271	8.004	4.58135	5.75956	6.90664	8.45922	4.46819	6.17961
AT3G47110.1	Thhalv10010172m	0.762546	0.227546	0.708726	0.242791	0.448056	1.09888	0.272865	2.79532	5.71391
AT3G47890.1	Thhalv10010059m	11.5313	8.87261	11.3242	6.11719	7.9941	9.53488	7.71255	7.51178	14.3602
AT3G47910.1	Thhalv10010060m	12.6998	11.8535	17.0429	8.01261	12.5462	14.7243	10.6067	5.8417	10.7614
AT3G48110.1	Thhalv10018047m	22.8696	43.1393	30.0755	26.4664	24.0115	25.4486	22.0589	19.4672	18.4069
AT3G48190.1	Thhalv10010050m	3.94446	4.6232	3.81948	3.34801	4.92191	4.16261	3.17859	2.00047	3.58671
AT3G48195.1	Thhalv10010097m	5.63886	5.40311	6.36423	6.49445	7.1112	7.0531	11.3549	4.59468	8.62437
AT3G48430.1	Thhalv10010068m	6.49408	7.21265	9.6886	4.10642	5.2589	7.06398	4.35629	2.33699	3.33795
AT3G48470.1	Thhalv10010098m	2.82794	2.86975	4.00487	2.21197	2.90796	3.31333	3.0468	4.50095	5.01556
AT3G48730.1	Thhalv10010337m	106.343	146.646	90.6414	73.6171	50.5803	76.6625	45.08	171.726	125.343
AT3G48830.1	Thhalv10010292m	1.8874	2.93618	1.99266	1.13558	3.48746	2.89348	1.40925	2.41391	3.27731
AT3G48870.1	Thhalv10010105m	65.5404	54.7186	95.1017	18.413	20.4555	60.4499	18.1771	61.1576	44.7561
AT3G48880.1	Thhalv10010519m	16.9203	12.4072	12.7827	19.2958	16.7616	16.5333	19.5311	13.1677	15.0971
AT3G49060.1	Thhalv10010130m	8.14481	7.32823	8.3759	7.10455	5.44939	7.87779	8.1233	8.81171	14.3403
AT3G49310.1	Thhalv10010332m	17.9729	12.7986	23.1992	14.0455	16.8012	17.7862	19.1379	6.23464	7.78479
AT3G49410.1	Thhalv10010256m	1.86641	1.58782	3.04491	0.302798	0.607498	1.72349	0.416485	3.28892	2.42407
AT3G49430.1	Thhalv10010586m	36.9994	35.9123	44.9893	22.9992	20.3235	40.1977	23.9334	53.0472	50.9573
AT3G49500.1	Thhalv10010107m	10.962	9.85682	11.7667	6.82594	8.33304	9.87543	7.1179	0.952385	1.69242
AT3G49600.1	Thhalv10010085m	7.37344	8.74213	7.80119	4.57579	5.97302	7.73512	4.56868	6.79122	9.03015
AT3G49650.1	Thhalv10010126m	2.71985	3.57463	3.2047	2.81976	4.8073	2.63411	2.47593	3.27834	2.78175
AT3G50370.1	Thhalv10010051m	26.2514	18.5585	31.6631	16.0796	16.5675	28.233	24.0867	6.23025	15.4687
AT3G50380.1	Thhalv10006113m	5.823	7.49316	5.24739	4.87136	6.22538	5.12065	6.74458	0.896815	0.230657
AT3G50590.1	Thhalv10010058m	24.6343	16.8449	28.322	16.9347	18.1188	24.4737	21.1499	6.51399	14.8244
AT3G50950.1	Thhalv10010117m	56.8687	45.2541	115.804	75.4561	32.8179	49.0978	116.859	5.96637	21.6073
AT3G51120.1	Thhalv10010070m	8.18348	6.89181	10.0268	7.08301	8.7924	9.19114	9.60842	4.96681	6.92627
AT3G51310.1	Thhalv10010136m	23.1901	22.1172	21.2623	17.9509	19.3947	23.4071	19.8926	11.4501	22.6626
AT3G51620.1	Thhalv10010169m	11.1198	8.57385	10.5198	6.77589	7.28917	11.0573	8.57737	3.87055	9.70488
AT3G52140.1	Thhalv10010065m	30.6867	28.1904	40.4664	20.3477	21.1958	35.3774	24.6431	20.82	31.9158
AT3G52250.1	Thhalv10010054m	7.83816	7.87439	9.51957	7.20976	8.50547	7.39084	11.9203	6.18528	9.94301
AT3G53090.1	Thhalv10010078m	5.86314	5.98109	5.79553	4.28641	6.14674	6.1997	7.78399	2.89344	8.0602
AT3G53100.1	Thhalv10010500m	19.4388	15.8399	7.33444	10.3709	7.59361	15.9658	8.52423	21.0413	14.5996
AT3G53240.1	Thhalv10010101m	4.96306	6.24589	4.0369	3.86927	4.76895	6.13108	5.39083	4.74578	7.14673
AT3G53500.1	Thhalv10010597m	66.8497	61.5298	30.3887	28.194	48.4804	69.8368	79.5528	46.8558	37.8207
AT3G54230.1	Thhalv10010093m	16.7845	14.1023	14.9427	12.1345	12.4832	14.9309	17.7743	11.9625	17.3156
AT3G54280.1	Thhalv10010052m	7.39939	9.66167	10.2212	6.14908	8.00597	9.27426	8.11646	4.10372	10.1644
AT3G54350.1	Thhalv10010165m	12.6484	13.2664	13.33	10.4218	9.97693	12.6314	13.9476	15.3204	19.1831
AT3G54440.1	Thhalv10010080m	22.723	19.3411	15.4081	21.6045	30.2455	17.522	12.6685	9.0982	15.3775
AT3G54460.1	Thhalv10010067m	9.17721	7.33116	11.5298	13.7469	11.8791	10.2483	5.53157	2.57998	5.7403
AT3G54540.1	Thhalv10011003m	32.5569	25.235	30.5733	22.0353	23.9924	30.8173	35.1256	0	0.146402
AT3G54760.1	Thhalv10010166m	30.5247	24.7282	30.027	12.7986	19.7795	28.8482	16.8915	7.15333	9.922
AT3G55160.1	Thhalv10003503m	3.11183	2.70654	4.35691	1.53592	1.42344	3.01561	1.94371	2.41646	3.54513
AT3G55270.1	Thhalv10010135m	17.9173	12.2237	22.1824	18.1077	16.3324	18.5672	29.4875	6.96585	16.7155
AT3G55320.1	Thhalv10010064m	5.45962	4.66839	6.50652	5.03643	6.40108	6.33618	5.0843	2.20842	4.82023
AT3G55410.1	Thhalv10010095m	49.9782	37.6757	53.6251	45.6069	52.0368	54.4703	39.7782	28.5214	50.3402
AT3G56150.1	Thhalv10005778m	70.4996	68.9171	103.606	38.9059	43.4659	94.627	41.1825	31.1425	40.6111
AT3G56370.1	Thhalv10005773m	18.782	24.8206	18.5656	4.41385	12.1053	18.9822	2.41921	13.9452	18.5478
AT3G56580.1	Thhalv10006102m	19.2408	18.8589	20.9716	10.7383	13.6772	21.8502	10.0249	10.5046	15.5808
AT3G56990.1	Thhalv10005807m	15.7844	9.22801	11.9465	4.79216	10.2154	8.9426	8.42734	8.72361	10.4862
AT3G57300.1	Thhalv10005740m	15.4536	13.6495	15.8309	12.8041	15.3495	17.9445	19.2555	4.79612	10.6802
AT3G57410.1	Thhalv10005772m	39.6832	21.3636	44.5785	30.7127	26.0028	28.4515	35.5161	14.3399	13.509
AT3G57660.1	Thhalv10005738m	8.99248	7.6738	10.5942	3.07024	5.02375	9.17909	4.23463	6.84631	10.3299
AT3G57940.1	Thhalv10005765m	6.55579	5.41617	7.13891	2.43542	4.3701	6.05328	2.20758	6.62378	7.51681
AT3G58030.1	Thhalv10005986m	13.8343	11.2996	11.0597	7.77689	7.62387	13.2525	12.1901	16.7093	16.189
AT3G58130.1	Thhalv10002036m	7.74643	6.61812	6.34498	4.94948	6.82053	8.23801	7.32107	15.0307	16.2992
AT3G58500.1	Thhalv10006109m	78.6324	77.2968	82.2256	72.1615	56.8807	77.4707	124.619	60.0179	75.1313
AT3G58640.1	Thhalv10005790m	20.581	18.3393	19.2341	20.0195	16.9096	21.3867	33.5707	7.14748	14.1615
AT3G59020.1	Thhalv10005763m	25.0428	22.6376	30.4124	22.0249	21.5535	22.9626	33.4632	8.92238	14.7361
AT3G59290.1	Thhalv10005771m	9.18831	6.77435	11.3079	4.5283	8.08624	11.4435	8.99299	5.57799	12.0586
AT3G59360.1	Thhalv10006015m	21.8102	15.8612	18.5968	13.9963	18.9858	14.7505	20.5171	14.162	20.6338
AT3G59410.1	Thhalv10005755m	9.14289	7.13349	7.24082	10.7896	9.85549	10.8704	12.1111	5.89614	7.63571
AT3G59430.1	Thhalv10005962m	3.04904	2.82857	2.06314	2.04755	2.21607	3.07049	3.02058	3.11043	5.84285
AT3G59630.1	Thhalv10005976m	5.67628	7.05953	5.98302	4.26423	6.02313	6.50787	4.16153	3.87198	6.53416
AT3G59770.1	Thhalv10005739m	14.7876	12.9613	12.0903	11.8022	14.9377	14.6641	19.2482	8.39611	11.2833
AT3G59950.1	Thhalv10005940m	16.5668	17.4856	15.162	14.8333	15.2612	17.1437	12.5992	102.315	73.5893
AT3G60310.1	Thhalv10006501m	2.61137	2.58581	3.21466	2.50868	2.98136	3.4345	4.10782	1.28658	3.80995
AT3G60350.1	Thhalv10005776m	10.4579	10.0609	11.0886	8.3913	10.275	12.1603	11.2327	3.01881	7.81831
AT3G60740.1	Thhalv10005754m	7.95819	7.14496	7.45828	5.69357	6.31846	7.82523	5.88087	3.46452	4.70216
AT3G61415.1	Thhalv10006063m	8.18205	6.80014	8.23608	5.96997	7.48509	9.05285	8.13589	10.539	8.97576
AT3G61480.1	Thhalv10005756m	12.4197	8.7397	4.86075	6.12819	11.4977	6.90064	12.7241	6.06399	11.3842
AT3G61690.1	Thhalv10005749m	11.1079	10.3107	12.355	6.5308	13.2719	10.8803	9.4255	3.58696	12.9448
AT3G62010.1	Thhalv10005753m	17.283	13.3304	19.5797	37.0561	26.8372	17.9061	24.6453	8.72663	15.4907
AT3G62330.1	Thhalv10005921m	12.008	11.4265	9.33539	7.24003	8.88874	11.7835	8.6654	6.36595	10.466
AT3G62360.1	Thhalv10005752m	32.5401	23.6023	38.4808	24.3274	23.2929	26.5789	29.1449	22.074	35.5281
AT3G62900.1	Thhalv10005746m	10.1254	7.15879	10.0848	6.21328	8.72351	10.4707	10.2005	4.04466	12.1956
AT3G63070.1	Thhalv10005747m	11.9158	10.2491	15.6589	9.56634	11.019	14.9639	12.1978	3.20296	13.0544
AT3G63400.1	Thhalv10006033m	20.2437	22.044	23.8576	16.2969	16.2286	26.2381	27.0278	8.66351	22.1726
AT3G63500.1	Thhalv10018026m	27.3061	14.0931	35.2491	18.4818	12.9242	27.1968	32.7507	5.21031	9.18345
AT4G00060.1	Thhalv10028362m	9.54721	10.0419	9.82952	7.34424	9.46827	9.75749	11.9484	1.76133	7.64553
AT4G00450.1	Thhalv10028357m	8.21467	8.33483	9.76725	6.68733	7.1563	9.01068	9.18746	2.3833	7.99746
AT4G00570.1	Thhalv10028520m	52.5856	39.0333	62.597	38.1254	29.9845	50.0339	38.9536	36.8648	44.51
AT4G01030.1	Thhalv10028368m	1.89211	1.78289	2.08088	2.85689	2.91784	2.11473	2.86648	11.9399	11.855
AT4G01210.1	Thhalv10028385m	15.8766	12.4313	14.2415	14.1565	11.8216	13.9207	13.4533	9.01933	12.5546
AT4G01290.1	Thhalv10028394m	31.3031	29.8617	33.4043	23.8022	31.4334	30.9831	30.1971	17.4919	35.1057
AT4G01800.1	Thhalv10028392m	57.0348	79.2781	64.9197	58.67	55.7369	52.2245	56.0245	70.6413	64.7428
AT4G01810.1	Thhalv10028421m	13.282	14.0584	12.9252	11.7358	13.9985	14.4364	11.482	11.0568	16.5774
AT4G01860.1	Thhalv10027621m	7.33316	6.45639	7.44201	3.83875	4.43618	6.32587	7.7247	5.71371	6.08817
AT4G02020.1	Thhalv10028423m	19.8345	14.2923	15.9972	11.6032	19.3693	15.5709	14.9872	10.7742	18.5915
AT4G02030.1	Thhalv10028443m	13.2796	9.79035	13.0689	10.826	10.2772	10.4173	15.9055	13.0466	21.3842
AT4G02260.1	Thhalv10028413m	20.1141	34.0911	22.2401	31.2657	41.2926	23.852	22.0454	27.4695	42.2286
AT4G02460.1	Thhalv10028404m	2.37881	3.35255	3.55156	4.89255	4.25571	2.30633	2.87601	0.902331	0.679322
AT4G02480.1	Thhalv10028366m	67.0132	46.8253	70.8675	58.5372	60.9128	62.7837	87.6478	36.8754	75.654
AT4G02510.1	Thhalv10028361m	49.8977	59.424	67.6256	47.7164	44.5339	47.8794	39.8236	54.8671	68.4995
AT4G02560.1	Thhalv10028403m	9.40928	7.62279	12.341	5.81524	7.19531	11.6532	6.0288	5.5113	9.09974
AT4G02680.1	Thhalv10028410m	22.6439	15.6287	24.0968	10.2598	11.3731	24.3973	12.3143	20.0887	26.5323
AT4G02760.1	Thhalv10028579m	2.93834	2.7416	4.69274	1.60644	1.80263	3.08648	1.09147	1.61007	3.65954
AT4G02900.1	Thhalv10029277m	1.76417	4.50688	1.77583	1.69622	2.21155	2.22601	2.31648	1.08291	1.93745
AT4G03020.1	Thhalv10028659m	40.6494	38.644	34.9931	36.3835	33.2143	43.8068	53.4371	49.4182	73.7084
AT4G03080.1	Thhalv10028417m	22.7093	22.9564	22.2004	29.3254	23.469	22.0241	31.3254	14.656	24.9029
AT4G03250.1	Thhalv10028592m	4.20356	4.01637	3.17797	3.28325	4.62183	4.32958	4.46572	3.41928	4.64649
AT4G03260.1	Thhalv10028489m	27.0292	46.7271	28.9923	30.1711	38.8367	32.2275	29.7066	39.589	74.8493
AT4G03550.1	Thhalv10028360m	14.9664	9.06095	15.2567	10.5818	5.69662	14.046	12.7142	7.47007	16.1367
AT4G03560.1	Thhalv10029480m	64.8631	46.3335	43.7496	82.4532	47.2489	56.0143	126.66	50.8518	99.4987
AT4G04180.1	Thhalv10028536m	3.10198	2.7423	4.46898	2.03275	2.77881	4.22309	1.17221	4.59459	7.78906
AT4G04320.1	Thhalv10028619m	14.8619	18.3429	4.62021	13.7483	16.3136	13.9925	18.524	6.56138	5.16219
AT4G04340.1	Thhalv10028449m	30.5208	36.1837	31.5204	77.7609	80.289	33.7877	40.4543	18.9304	28.4194
AT4G04350.1	Thhalv10028396m	17.7648	26.4952	20.4953	18.4932	21.9501	16.9664	14.6227	25.7647	24.4251
AT4G04670.1	Thhalv10028391m	2.62447	4.26709	5.10511	1.0458	2.17643	5.021	1.62352	6.93107	8.54241
AT4G04720.1	Thhalv10028567m	31.8346	24.0401	26.0486	21.7723	14.7305	23.8376	19.3824	20.7864	37.1154
AT4G04885.1	Thhalv10028426m	9.07994	9.20086	10.31	8.52407	8.58404	9.75368	8.87356	6.46246	9.95628
AT4G04920.1	Thhalv10028367m	8.86519	6.7929	10.6482	3.98832	4.31943	11.0342	7.71391	6.72725	12.1016
AT4G04940.1	Thhalv10028405m	4.62216	5.43886	5.96354	1.5698	3.21645	5.83626	2.12541	8.88607	8.11839
AT4G04950.1	Thhalv10028614m	23.4304	21.131	23.2364	16.1869	19.0905	24.3071	14.2905	24.4564	25.8851
AT4G05420.1	Thhalv10028374m	22.0295	16.6093	20.2701	17.8844	16.3957	16.1108	24.0587	19.6867	27.8241
AT4G06676.1	Thhalv10028801m	7.18513	4.46525	6.7978	5.05743	4.90076	6.39488	6.52569	16.8122	23.2884
AT4G08180.1	Thhalv10028436m	13.1829	7.81679	16.0351	9.45848	8.32603	15.788	12.8252	6.78757	14.59
AT4G08310.1	Thhalv10029139m	23.326	19.2233	24.4593	13.0025	18.6906	26.3495	18.5509	9.75846	18.8023
AT4G08320.1	Thhalv10028662m	25.158	10.0242	12.4399	10.2937	7.24407	14.3429	13.3235	11.678	13.8981
AT4G08500.1	Thhalv10028523m	19.0018	9.61712	25.5025	16.7627	8.6576	12.9457	18.5055	8.16576	17.3485
AT4G08510.1	Thhalv10028540m	4.07843	4.10581	5.40078	2.23967	3.02061	4.84575	2.9601	5.32857	8.17952
AT4G08540.1	Thhalv10028627m	13.0516	14.7363	13.1413	18.0379	13.3238	13.6773	21.8458	7.16099	9.28962
AT4G09150.1	Thhalv10028375m	28.2406	18.7829	17.8474	26.1169	18.7639	19.0432	18.9762	21.7004	23.8145
AT4G09680.1	Thhalv10029299m	1.22378	9.01375	7.26321	6.57007	0.442446	11.2457	0.446692	1.13546	2.69074
AT4G09730.1	Thhalv10028511m	26.8545	39.5831	38.2779	23.4611	27.582	39.7978	21.3598	24.8152	23.6558
AT4G09980.1	Thhalv10028402m	10.1431	10.2267	10.9152	4.04119	5.72623	10.8918	5.28547	7.96136	18.0741
AT4G10320.1	Thhalv10027624m	45.4625	33.5365	45.2292	28.2503	24.5096	39.2602	31.3924	25.2052	34.3014
AT4G10550.1	Thhalv10028448m	2.69716	2.8299	2.2242	1.68693	3.23243	3.6565	1.81773	0.169109	0.925959
AT4G10570.1	Thhalv10028406m	5.51783	5.46802	5.69795	4.3905	4.74764	7.98535	3.44126	6.85313	8.79668
AT4G10730.1	Thhalv10028480m	17.4807	17.7699	17.6723	22.9877	16.2557	20.6028	26.2124	12.4008	19.4287
AT4G10930.1	Thhalv10028398m	8.33684	4.13846	6.96391	5.28455	5.5721	6.8546	5.2095	5.42162	10.7436
AT4G11110.1	Thhalv10028383m	9.24353	8.13538	9.6697	9.70623	13.6945	8.66193	11.5362	6.66775	12.7546
AT4G11130.1	Thhalv10028370m	2.23976	2.10491	2.85348	1.1406	1.54691	2.93888	1.25079	4.52516	4.88753
AT4G11160.1	Thhalv10028461m	18.5782	15.1872	24.5933	12.9457	14.0213	24.8966	10.5645	14.7081	10.1941
AT4G11260.1	Thhalv10028764m	73.7254	69.2092	58.5696	114.802	54.0886	77.8593	147.724	81.9485	100.578
AT4G11270.1	Thhalv10028363m	10.2155	9.20461	11.8629	8.07011	5.52944	10.2487	7.45779	2.5855	4.8365
AT4G11670.1	Thhalv10028371m	6.91149	5.7504	3.99829	4.82472	4.53692	7.64283	8.55288	3.98629	5.18196
AT4G11800.1	Thhalv10028387m	10.3941	8.88743	10.6081	8.82503	11.7161	8.31286	13.2249	3.79643	7.99341
AT4G11860.1	Thhalv10028490m	11.9274	10.3611	12.987	8.24179	10.9242	11.0652	14.5262	7.88455	16.0675
AT4G11970.1	Thhalv10029158m	5.06978	6.9886	4.47392	4.26503	3.47579	5.62757	4.77801	4.76778	7.5306
AT4G12020.1	Thhalv10028393m	0.117131	4.94594	5.82037	6.82133	3.40159	4.63419	7.75963	4.95594	6.69904
AT4G12120.1	Thhalv10028497m	5.71832	3.02447	5.72854	1.75143	5.78029	4.94755	10.361	1.76739	5.12798
AT4G12640.1	Thhalv10023280m	8.6097	6.24932	10.6949	5.14672	5.37166	9.50462	5.86213	2.98683	5.19989
AT4G12750.1	Thhalv10024262m	4.07966	4.60702	5.42524	2.98207	6.66305	5.02713	3.24477	4.27869	5.57855
AT4G13750.1	Thhalv10024181m	1.61936	1.82051	2.85596	1.5738	2.38509	3.40363	0.886362	1.41834	2.39999
AT4G13970.1	Thhalv10024472m	6.35091	4.9618	4.56459	3.3877	3.43851	5.25085	5.30968	5.85769	4.87348
AT4G14150.1	Thhalv10024229m	1.89231	1.54905	2.80387	0.124412	0.227418	1.46232	0.110007	1.68596	2.08988
AT4G14290.1	Thhalv10024836m	3.53764	3.02727	3.67558	0.941965	1.20231	3.91603	0.727976	4.29285	5.54634
AT4G14340.1	Thhalv10025130m	17.437	14.0391	14.2049	15.2839	17.1386	14.4328	16.386	24.0565	31.8708
AT4G14360.1	Thhalv10024854m	32.7189	27.9139	35.7601	16.2482	20.69	23.655	9.85606	3.03339	4.04097
AT4G14760.1	Thhalv10024203m	6.7555	8.16133	7.04893	5.42645	8.74932	7.34335	2.92307	5.84549	8.52754
AT4G14790.1	Thhalv10025349m	5.43135	5.85456	4.91966	5.68063	4.23786	4.56698	5.39377	3.89729	3.98928
AT4G14990.1	Thhalv10024461m	14.8335	8.77669	2.77183	13.1162	2.1907	9.66834	15.6834	14.2747	26.1143
AT4G15090.1	Thhalv10024410m	7.01159	7.07976	7.39626	4.0425	4.53882	8.57604	6.072	6.87781	12.7565
AT4G15180.1	Thhalv10024183m	9.1265	8.01621	11.646	7.263	8.97689	9.36471	8.93482	3.47398	9.67866
AT4G15215.1	Thhalv10024221m	1.19528	1.97069	1.42514	0.272337	1.78938	0.350106	0.304512	0.643876	1.2028
AT4G15560.1	Thhalv10020205m	162.601	198.161	103.338	238.648	228.073	171.552	152.873	0	0
AT4G15570.1	Thhalv10024423m	5.7373	6.2373	6.0615	2.704	3.8833	4.72455	4.05297	5.20208	7.88497
AT4G16070.1	Thhalv10024634m	6.44305	5.31292	8.24323	6.00392	6.65031	7.44365	9.95312	4.1574	6.00138
AT4G16150.1	Thhalv10024342m	19.6519	19.8093	29.2786	24.3886	22.8207	26.4479	39.4483	12.044	29.6925
AT4G16280.1	Thhalv10024390m	8.70851	5.95982	5.04861	6.55505	6.25525	10.1503	8.77478	7.11374	12.7506
AT4G16310.1	Thhalv10024204m	7.24951	6.6464	6.25162	4.8876	8.37849	7.23747	5.83656	2.71257	5.28435
AT4G16340.1	Thhalv10024194m	14.557	13.8268	13.4531	6.87199	8.24008	12.5969	4.25131	7.53257	12.2304
AT4G17140.1	Thhalv10024176m	8.16949	9.721	9.98394	9.10286	17.299	9.11296	16.7029	3.65814	13.5163
AT4G17150.1	Thhalv10027147m	13.1881	12.9687	14.0812	9.4595	11.9667	13.9106	12.311	13.1524	20.0631
AT4G17330.1	Thhalv10024186m	21.9557	25.3723	24.8673	12.9519	23.4322	23.0209	16.6945	9.9214	21.5038
AT4G17610.1	Thhalv10024195m	2.56149	3.17323	2.48673	1.18928	1.41615	2.48487	1.0348	2.84231	3.17883
AT4G18240.1	Thhalv10024297m	23.2726	47.7581	18.437	35.9379	73.638	16.3759	24.4342	1.30425	20.2632
AT4G18465.1	Thhalv10024567m	6.09548	6.02902	5.04474	5.89444	5.78285	6.16162	7.42357	4.84718	8.84262
AT4G18600.1	Thhalv10024197m	1.4953	2.57002	3.92716	2.75841	3.47909	3.09967	3.75699	2.65306	5.59228
AT4G19040.1	Thhalv10024539m	13.1426	10.8792	13.0067	10.9838	12.2279	12.5198	14.6996	8.53235	16.5954
AT4G19110.1	Thhalv10027028m	120.037	150.374	99.9748	153.607	195.147	121.835	249.399	62.2207	87.4475
AT4G19190.1	Thhalv10024821m	11.2293	8.91873	9.16427	8.71941	9.37827	11.0801	16.3929	7.48648	11.8882
AT4G19490.1	Thhalv10024300m	14.6203	15.0655	9.29996	6.96471	8.22095	9.24017	17.8149	8.27035	14.6332
AT4G19600.1	Thhalv10024849m	14.2222	10.1128	12.1239	8.85471	9.89066	16.4204	7.32182	13.0819	19.6789
AT4G19670.1	Thhalv10024888m	15.9807	16.2179	13.1655	10.1795	11.3171	19.0588	19.7291	21.244	26.3494
AT4G20060.1	Thhalv10024260m	1.26276	1.44304	1.13179	1.52045	1.80288	1.97515	1.50127	1.71139	1.48588
AT4G20330.1	Thhalv10025896m	29.3645	21.9478	33.8599	19.8018	24.7302	24.9693	32.4436	14.2494	16.53
AT4G20380.1	Thhalv10001047m	32.1079	17.0744	39.5263	26.0145	12.3103	30.2558	37.9112	4.2023	5.30026
AT4G20400.1	Thhalv10024338m	13.4334	11.6957	13.1472	10.3413	9.62676	11.4416	11.5224	9.23025	14.2126
AT4G20850.1	Thhalv10024222m	57.3111	50.9254	60.4367	52.6883	49.1564	55.6561	62.6324	21.107	32.7749
AT4G20910.1	Thhalv10024326m	3.69366	4.74546	3.73527	2.55104	2.25145	4.57554	2.1825	2.09456	2.34288
AT4G21100.1	Thhalv10024273m	9.2346	9.37079	11.1823	3.9633	5.12905	8.885	6.12933	1.12688	2.04786
AT4G21300.1	Thhalv10024394m	1.04365	0.96611	1.21004	0.214223	0.357111	0.838907	0.392281	0.761631	1.52335
AT4G21670.1	Thhalv10024324m	7.0678	8.55352	13.5747	6.08673	6.42906	9.71719	7.78131	7.11471	26.5756
AT4G21700.1	Thhalv10024323m	4.98697	2.12633	6.75634	1.85411	2.21927	3.99514	2.15489	2.8833	5.49511
AT4G21710.1	Thhalv10024251m	22.0569	17.1933	27.0865	12.2589	11.9595	23.7556	21.7434	16.1469	25.6723
AT4G22130.1	Thhalv10024563m	14.6773	11.0714	13.011	2.43734	6.80241	14.466	2.12032	7.17372	11.3819
AT4G22970.1	Thhalv10029518m	1.07113	1.49781	1.56503	0.392774	0.374266	1.6269	0.481461	1.1308	3.95795
AT4G23460.1	Thhalv10028407m	23.706	17.684	26.7122	22.4094	16.911	26.0984	25.9637	23.4817	23.2013
AT4G23540.1	Thhalv10024271m	5.99655	5.21605	7.69336	4.69777	4.38278	7.39083	6.662	3.37054	3.94155
AT4G23640.1	Thhalv10024469m	18.0642	16.7937	18.5933	14.5556	20.1137	18.9754	15.0002	16.8194	21.7808
AT4G23850.1	Thhalv10025070m	122.255	72.2154	111.892	110.26	55.2783	97.2338	137.23	0	9.99059
AT4G23895.1	Thhalv10026064m	9.20316	7.32997	8.90993	10.2263	7.93111	8.04389	14.2376	7.99766	11.1108
AT4G24200.1	Thhalv10027094m	7.34664	4.21931	7.04477	3.99258	3.46569	5.76044	6.75426	3.93612	10.3163
AT4G24680.1	Thhalv10024213m	16.9019	14.4043	19.5378	10.4285	12.9959	16.4335	14.9078	3.71384	7.45742
AT4G24800.1	Thhalv10024556m	36.1517	24.9515	30.5664	43.3963	30.2088	23.7669	55.4578	19.3827	18.6331
AT4G25120.1	Thhalv10024258m	2.29348	2.27603	3.07548	1.38382	1.2238	2.56982	3.13973	0.93362	2.74755
AT4G25230.1	Thhalv10024774m	18.328	14.6865	17.6356	17.5632	16.2819	21.4378	19.8572	9.50936	21.8743
AT4G25880.1	Thhalv10024383m	24.0784	23.9625	26.1485	20.9643	19.8807	26.3735	27.4163	17.1065	27.8979
AT4G26300.1	Thhalv10029198m	35.4014	35.096	37.4352	30.7811	36.4686	29.8285	24.4207	0.648719	0.944893
AT4G26510.1	Thhalv10013448m	10.0943	20.3291	17.4027	18.3039	14.3254	14.6855	14.558	12.4874	16.6549
AT4G26910.1	Thhalv10007517m	37.6827	25.1181	4.96952	28.1619	17.8572	32.4161	54.1541	13.6147	22.3414
AT4G27010.1	Thhalv10009735m	1.59292	2.0489	3.53449	0.797964	1.30884	2.11877	0.769807	0	0
AT4G27180.1	Thhalv10024503m	18.2163	20.8937	17.363	12.1671	19.9699	17.0326	8.97822	13.7164	21.7448
AT4G28070.1	Thhalv10025101m	3.75592	3.51958	3.40474	2.28709	1.6958	4.11379	3.6786	5.37145	6.75068
AT4G28370.1	Thhalv10024798m	6.85302	7.65111	8.27984	6.21319	6.90712	7.25413	8.0269	4.4615	8.05769
AT4G28470.1	Thhalv10024363m	21.6883	18.8961	31.7373	13.8711	15.4058	29.0029	13.2932	29.705	47.0981
AT4G28760.1	Thhalv10024350m	15.8255	16.6395	16.7233	8.20202	12.6946	15.2454	15.9664	9.39902	12.6262
AT4G29010.1	Thhalv10024533m	53.608	48.0685	47.723	71.063	97.0898	56.1942	59.9525	28.1078	45.8444
AT4G29380.1	Thhalv10024212m	8.85653	5.82516	8.2248	7.74747	7.1073	8.45807	17.4922	2.72317	6.40941
AT4G29750.1	Thhalv10024391m	11.233	23.2325	9.30528	18.2768	21.6447	10.2597	12.279	21.9601	14.1069
AT4G29790.1	Thhalv10024244m	7.38834	5.91726	8.13752	5.84036	6.69638	7.65539	8.97308	4.04548	9.23098
AT4G29900.1	Thhalv10024281m	57.9782	18.0147	30.8979	42.6737	13.1327	42.1674	87.7581	12.431	42.6465
AT4G29910.1	Thhalv10005869m	6.34243	5.36203	3.71132	4.89543	4.4607	4.39363	7.78143	17.8733	17.6006
AT4G30100.1	Thhalv10024227m	15.7347	15.7791	30.5717	13.1017	17.3517	20.8733	17.3016	6.99394	15.4516
AT4G30150.1	Thhalv10024190m	2.85011	3.20649	3.64217	1.2313	2.12085	2.88123	1.16952	1.68786	3.25426
AT4G30790.1	Thhalv10024256m	9.20328	8.00534	10.0926	7.2864	8.12439	9.59528	12.4786	4.72349	10.247
AT4G30870.1	Thhalv10024629m	3.46904	2.1413	3.70685	1.63034	1.08493	3.57263	1.85171	2.11964	3.40384
AT4G30950.1	Thhalv10025201m	164.486	255.507	160.515	166.769	180.891	166.006	132.389	211.991	203.151
AT4G31160.1	Thhalv10024189m	6.69609	6.21664	9.70382	3.73818	5.84583	8.08334	6.08261	3.59423	5.85594
AT4G31200.1	Thhalv10024645m	8.10185	8.01226	8.19335	6.52412	7.46137	8.82121	7.13573	4.53024	4.34524
AT4G31210.1	Thhalv10024242m	10.741	17.6585	12.9753	7.97297	13.3489	10.7167	4.48567	7.55254	9.85333
AT4G31480.1	Thhalv10024334m	45.4757	34.3761	45.2489	12.3727	32.8262	45.3762	15.1379	42.9748	68.0864
AT4G31540.1	Thhalv10024589m	0	4.84923	5.73116	3.94974	0	0	0	3.88777	4.8446
AT4G31570.1	Thhalv10024180m	3.5678	4.5854	5.18803	3.90866	5.84521	4.85932	4.12569	4.08216	10.3478
AT4G31850.1	Thhalv10024264m	8.45589	16.7537	10.5119	11.9993	12.3493	9.7306	10.5806	12.9598	15.0106
AT4G31880.1	Thhalv10024366m	15.1926	17.9001	24.0861	8.38812	8.78041	16.347	14.5156	13.4969	18.2686
AT4G32010.1	Thhalv10024481m	12.6121	9.17994	13.7307	9.03649	7.83869	13.6353	11.881	7.38353	16.5029
AT4G32180.1	Thhalv10024357m	20.5666	19.6469	21.9645	19.5147	21.2217	26.3175	23.3039	20.6721	27.9379
AT4G32410.1	Thhalv10024278m	148.814	80.3662	134.83	89.9004	112.957	117.994	57.5357	46.0173	74.8809
AT4G32420.1	Thhalv10024440m	16.2707	19.8452	19.4	11.5778	14.8447	18.5531	8.60971	7.77991	12.0427
AT4G32520.1	Thhalv10024909m	37.9173	48.0596	41.4872	33.1214	37.7577	38.7475	23.2133	21.3354	25.5093
AT4G32551.1	Thhalv10024343m	26.2749	26.4614	28.9586	14.88	17.1469	26.7046	16.3575	19.2835	26.8508
AT4G32600.1	Thhalv10025242m	13.067	18.0921	14.6811	12.3933	20.1748	13.9159	11.0615	16.8122	18.8962
AT4G32620.1	Thhalv10024206m	7.68807	7.05411	8.45761	4.69858	5.57785	7.91893	5.02863	4.55528	11.2312
AT4G32640.1	Thhalv10024276m	21.0717	18.1634	24.7782	18.8281	19.9916	22.4396	24.5554	10.8283	16.0998
AT4G32730.1	Thhalv10024320m	12.2716	7.67073	8.11234	2.27219	5.38787	7.46155	4.78204	4.88499	9.25979
AT4G32760.1	Thhalv10024602m	46.4856	31.6935	39.3179	34.4913	41.0226	46.2141	60.6581	13.0566	22.1904
AT4G32820.1	Thhalv10026823m	5.90416	5.09359	6.16932	3.54745	4.7107	6.43537	4.29633	1.79517	5.02946
AT4G32840.1	Thhalv10025143m	6.1454	5.69898	6.44599	2.98903	2.65515	6.1417	4.86104	5.50202	8.59449
AT4G32850.1	Thhalv10024486m	26.4441	19.9801	23.4766	21.3013	21.6692	42.0914	31.7452	11.7696	19.8124
AT4G32920.1	Thhalv10024217m	7.64173	10.1778	9.9569	2.00254	4.59354	10.0188	3.25995	1.91387	3.95675
AT4G33200.1	Thhalv10024207m	9.37624	9.05429	8.96851	8.08926	6.11357	7.93732	10.1877	4.93591	12.0935
AT4G33240.1	Thhalv10024198m	8.37668	8.80758	9.02182	6.03925	8.5907	8.31827	8.08239	4.84873	9.16711
AT4G33430.1	Thhalv10024694m	29.7552	13.06	30.0026	25.3456	12.0519	20.0872	31.5425	20.8573	25.0335
AT4G33630.1	Thhalv10024585m	28.0725	46.7163	20.3503	35.9404	42.5667	28.0905	31.3157	12.901	14.3961
AT4G34040.1	Thhalv10024583m	14.7845	15.2681	14.2498	10.8607	13.9447	16.5367	10.4758	19.331	27.1466
AT4G34100.1	Thhalv10022450m	35.5865	27.423	33.8797	33.5963	27.4897	33.9744	46.4138	49.1231	42.2495
AT4G34280.1	Thhalv10024491m	5.95975	8.05461	4.70429	8.27898	7.6586	6.26252	9.66974	3.50971	9.71455
AT4G34660.1	Thhalv10025489m	17.5959	11.9454	17.7846	9.54822	10.0551	16.1604	12.5545	10.5242	11.5701
AT4G35800.1	Thhalv10024193m	26.2526	23.0966	31.6147	19.8684	18.4583	27.3522	25.3576	7.0825	18.2489
AT4G35830.1	Thhalv10024358m	116.859	92.0457	118.263	115.46	97.7819	132.429	127.557	47.5131	64.2655
AT4G36080.1	Thhalv10024177m	3.64453	4.55111	4.03958	3.95683	3.2572	4.11183	3.51532	2.52087	6.99716
AT4G36630.1	Thhalv10024305m	10.8727	8.5214	10.6883	9.81702	9.15729	10.1872	10.936	8.31229	10.6564
AT4G36960.1	Thhalv10025462m	17.538	19.2603	13.9871	16.1081	18.8824	17.5123	16.7504	18.0562	18.1722
AT4G37440.1	Thhalv10025086m	29.6563	19.5142	23.3628	21.0847	22.4455	19.8316	27.4835	35.6149	39.1796
AT4G38120.1	Thhalv10024269m	12.1233	12.5422	14.0552	9.77009	12.7186	12.3225	11.2506	2.856	9.96816
AT4G38200.1	Thhalv10024199m	9.60794	7.63597	11.1773	3.88603	6.35694	10.0506	7.4164	8.07476	32.3938
AT4G38350.1	Thhalv10024233m	22.3927	23.7763	20.7	19.7045	25.1851	22.268	21.2776	11.7348	20.2421
AT4G38440.1	Thhalv10024216m	4.65823	4.88877	5.80458	3.16074	4.20801	6.47493	5.09465	4.11618	10.67
AT4G38510.1	Thhalv10025037m	59.8882	75.4495	74.5212	55.6281	81.7991	68.3631	35.3906	53.701	53.4997
AT4G38600.1	Thhalv10024192m	28.2895	25.9835	33.6173	24.2941	26.1521	30.9349	28.1197	10.5155	27.8624
AT4G38760.1	Thhalv10024188m	7.24003	11.5836	6.79707	4.10046	6.53376	6.21036	4.55164	4.6226	9.5153
AT4G39170.1	Thhalv10024693m	27.2232	27.9175	25.8705	18.8068	25.8287	26.4064	19.9837	17.8013	19.8057
AT4G39420.1	Thhalv10024179m	4.52963	5.25169	6.21941	5.41004	7.24806	5.47154	6.1038	3.84213	6.41815
AT4G39520.1	Thhalv10025515m	44.0984	32.1097	32.5765	25.5986	29.9305	35.2417	37.4339	34.4086	42.2517
AT4G39680.1	Thhalv10024660m	46.0302	58.3124	45.9612	31.0302	45.0963	49.1065	31.9176	30.253	46.5595
AT4G39850.1	Thhalv10024225m	13.2154	13.3598	15.8944	13.3072	17.6031	17.035	15.0378	10.6423	25.6461
AT4G40000.1	Thhalv10000064m	1.32909	3.35724	3.57062	0.298489	1.25533	2.21695	0.246007	2.22657	1.84123
AT5G01400.1	Thhalv10012442m	9.62396	9.1272	11.6039	6.56777	8.70789	20.4613	8.69137	6.93049	13.3558
AT5G01950.1	Thhalv10012735m	12.1661	8.19473	12.9951	19.6117	9.36391	15.3626	23.9322	8.70101	0.691506
AT5G02310.1	Thhalv10012411m	11.105	11.6153	11.6299	12.3193	11.2975	12.5046	14.6736	6.17807	14.9228
AT5G02320.1	Thhalv10013211m	2.67334	1.51805	3.4989	1.47013	2.21044	2.60482	4.08344	4.16412	3.72379
AT5G02880.1	Thhalv10012430m	12.9005	12.2107	13.9307	13.2214	16.9325	13.6411	21.3852	6.31392	16.3582
AT5G03280.1	Thhalv10012456m	24.9252	18.2414	26.182	18.623	20.8313	29.8222	23.4408	10.9213	21.8185
AT5G03730.1	Thhalv10012708m	36.6498	23.7423	30.3177	25.5652	19.154	37.727	39.4619	8.0273	16.9021
AT5G04290.1	Thhalv10015730m	12.2263	9.16324	13.5544	5.66376	7.75784	15.4443	8.30621	0.195124	0.218387
AT5G04320.1	Thhalv10013000m	6.59639	10.5757	10.9443	4.77799	3.44742	9.42571	2.65779	4.91468	3.91053
AT5G04460.1	Thhalv10020131m	10.2354	8.76629	12.1574	7.39779	9.80121	11.8727	9.15308	4.30971	6.34008
AT5G04480.1	Thhalv10012611m	11.5648	6.54666	14.6911	7.84473	4.27345	8.96509	6.40695	2.39052	3.98834
AT5G04540.1	Thhalv10012689m	10.4188	8.9104	12.294	8.46417	9.11813	11.8019	11.4843	6.04176	8.65135
AT5G04885.1	Thhalv10012900m	10.0403	18.3483	8.98499	4.61826	12.7823	9.83579	6.23	10.474	17.0811
AT5G04930.1	Thhalv10012494m	20.719	12.6937	20.5028	35.7917	10.9639	22.2666	54.9811	12.1899	29.2257
AT5G05010.1	Thhalv10013243m	107.537	86.7767	111.917	74.2423	73.0484	93.1181	77.9696	54.4024	61.0747
AT5G05560.1	Thhalv10012420m	4.00724	4.73162	4.56771	2.54466	3.1411	3.80121	2.33467	2.08661	4.95095
AT5G05570.1	Thhalv10012508m	8.5193	6.53457	10.2233	6.38767	5.88827	8.72347	7.63784	6.65852	11.1608
AT5G05930.1	Thhalv10014411m	18.8189	12.6769	12.134	23.5271	17.297	13.7682	40.0858	14.5534	19.6404
AT5G05980.1	Thhalv10013069m	17.9964	18.2253	20.4283	12.9857	15.5256	19.3467	19.0503	16.2999	20.2101
AT5G06120.1	Thhalv10012516m	9.65824	9.56885	9.8109	7.85672	10.0626	9.40847	9.64898	6.92194	12.1468
AT5G06160.1	Thhalv10013305m	18.0596	15.9941	18.1069	11.661	13.6431	16.7459	14.5905	29.2406	29.7413
AT5G06460.1	Thhalv10012525m	11.4064	11.054	15.9864	4.65945	6.65398	14.5784	7.63383	8.1785	15.3804
AT5G06600.1	Thhalv10012503m	33.8004	34.5703	33.8828	36.5559	42.6664	33.0622	35.2962	20.0634	37.1314
AT5G06670.1	Thhalv10012568m	3.74182	5.67369	2.77354	2.79232	3.30919	4.63727	0.906912	6.39418	5.0083
AT5G06680.1	Thhalv10012676m	5.18255	4.16322	4.86942	2.56959	3.31764	5.31686	3.17794	4.40871	6.29823
AT5G06950.1	Thhalv10014082m	8.38014	6.2774	8.43822	5.92572	6.19443	8.57999	7.38411	19.7841	8.82834
AT5G06970.1	Thhalv10012512m	15.9526	9.42957	19.4535	14.4066	13.4145	13.2832	11.3428	13.6407	19.7961
AT5G07290.1	Thhalv10012619m	10.0919	9.29639	8.81014	7.32479	11.1863	8.8068	12.4691	9.43465	14.2629
AT5G07350.1	Thhalv10012565m	54.6021	39.178	62.1316	24.1985	28.128	47.5769	27.4138	41.535	55.0097
AT5G07370.1	Thhalv10013933m	26.2766	37.5956	24.5272	24.6551	25.5584	26.8962	24.2798	13.7859	15.3979
AT5G07740.1	Thhalv10013334m	11.3954	10.3267	8.90276	8.35075	9.34774	10.2062	10.1784	11.8288	16.2062
AT5G07920.1	Thhalv10012787m	7.75918	5.33722	13.3941	5.383	6.57041	6.7162	9.18964	5.18116	9.78953
AT5G07940.1	Thhalv10012438m	7.54866	8.12676	9.97387	6.12867	6.97705	8.80503	6.91052	3.08388	8.22066
AT5G07980.1	Thhalv10012434m	5.02506	4.74665	6.45261	3.83989	5.69946	5.9746	4.92335	3.30403	9.09605
AT5G08230.1	Thhalv10012451m	5.60172	5.60538	5.5521	4.32679	6.08453	9.86456	5.60587	0.840491	5.4418
AT5G08390.1	Thhalv10012683m	9.64533	10.1817	9.47318	5.86673	7.60762	8.37341	6.36149	7.13078	9.94721
AT5G08440.1	Thhalv10012799m	6.12425	8.81717	6.30779	6.46371	8.0478	5.68001	6.24899	8.75805	10.4066
AT5G08450.1	Thhalv10012626m	31.6429	23.556	32.4945	18.6224	22.0774	28.5337	20.4979	11.4587	14.2013
AT5G08520.1	Thhalv10014203m	33.4118	22.1832	26.802	26.814	23.6927	31.0196	60.9515	14.9205	16.3129
AT5G08560.1	Thhalv10013060m	25.7165	17.0162	26.6898	16.9666	15.945	25.3379	20.3121	10.8256	20.3409
AT5G08630.1	Thhalv10012814m	6.49824	6.4103	8.29664	3.262	3.80485	7.91105	5.56772	3.43363	8.10482
AT5G08650.1	Thhalv10012870m	48.2995	83.9494	39.8363	57.0488	81.1458	38.0868	43.0242	96.4504	88.2638
AT5G08660.1	Thhalv10012930m	16.5114	8.47685	15.862	11.9103	6.30639	16.4018	23.8596	5.06373	9.14387
AT5G08750.1	Thhalv10013926m	4.77396	9.8964	11.0265	5.86988	4.59566	11.8848	5.70053	17.9198	22.2602
AT5G09230.1	Thhalv10013744m	7.32686	11.9161	10.2859	14.3785	21.7511	9.12065	6.24587	14.0751	25.2069
AT5G09400.1	Thhalv10012655m	10.9387	8.78068	12.6523	9.07344	9.8606	12.5675	9.77835	5.9498	13.2895
AT5G09410.1	Thhalv10012552m	20.7333	14.4878	16.3818	15.706	17.4916	14.4502	19.1098	7.54003	8.87422
AT5G09870.1	Thhalv10012521m	40.5985	41.9337	31.3757	26.7767	43.1384	37.5566	8.15678	15.808	23.6026
AT5G09950.1	Thhalv10001296m	0.597823	0.912386	0.77768	0.342735	0.433413	0.800789	0.519847	0.603325	0.77228
AT5G10200.1	Thhalv10012959m	9.74326	5.99007	11.5299	4.1333	2.74542	9.66267	3.86617	21.793	21.5934
AT5G10240.1	Thhalv10003890m	10.9269	11.4536	8.61995	5.04229	5.01676	10.3927	4.81262	89.6756	79.9462
AT5G10470.1	Thhalv10012459m	21.1583	39.2951	15.0559	21.7724	33.1054	16.0085	11.5774	12.8441	39.0053
AT5G10490.1	Thhalv10012873m	20.4003	20.7542	18.2422	10.9106	16.4072	18.7671	14.0564	13.7526	23.205
AT5G10540.1	Thhalv10012826m	18.6448	16.7918	16.0984	11.293	6.79661	18.041	11.6878	13.914	16.4963
AT5G10800.1	Thhalv10012641m	3.0015	2.87335	2.3047	1.91883	3.10816	3.10089	1.44621	5.03475	5.86805
AT5G10840.1	Thhalv10003800m	59.8798	43.466	66.935	43.0886	37.5943	59.5278	51.3076	28.6988	34.5112
AT5G10940.1	Thhalv10012761m	16.0672	16.1619	14.7752	10.5023	13.2796	16.2128	13.0854	9.69592	23.1311
AT5G11040.1	Thhalv10012483m	12.0557	10.6818	12.2399	7.98644	7.96304	11.7708	9.6395	6.26035	7.69679
AT5G11240.1	Thhalv10012983m	8.47702	9.3774	9.47613	2.78186	5.18748	8.93911	4.7266	11.7075	7.0185
AT5G11470.1	Thhalv10005547m	1.88458	2.28849	2.05465	1.05988	1.04582	1.75448	1.17427	0.38047	0
AT5G11490.1	Thhalv10012680m	23.659	17.9204	20.7239	15.664	20.2691	17.8156	20.666	12.7536	21.4385
AT5G11700.1	Thhalv10012440m	33.891	19.2642	30.2394	28.3768	25.0521	30.7188	30.7806	13.5798	28.8976
AT5G12350.1	Thhalv10012520m	12.7711	10.1322	13.5062	8.22368	9.84692	12.474	9.39723	6.66138	14.32
AT5G12370.1	Thhalv10012686m	34.4318	31.8342	35.7667	36.438	26.4915	35.7723	40.8112	11.5691	19.1345
AT5G12400.1	Thhalv10012427m	7.61207	5.64167	8.45035	4.9527	5.18363	7.39623	7.56727	4.53834	9.64967
AT5G12430.1	Thhalv10012476m	9.40897	8.08522	10.3925	8.66222	9.15149	10.3856	10.3868	2.96131	9.01529
AT5G12850.1	Thhalv10012818m	18.7311	14.1118	18.4397	14.5345	11.8753	20.7843	13.0544	1.35336	3.1369
AT5G13000.1	Thhalv10012412m	26.1671	29.8429	24.5216	9.18299	15.9413	22.8099	5.59796	17.1438	23.8858
AT5G13300.1	Thhalv10012699m	18.4004	17.7738	16.1247	14.1232	19.4875	17.6564	14.6276	12.1122	17.6145
AT5G13530.1	Thhalv10012422m	13.8561	10.7348	15.7783	9.90659	10.954	14.9588	11.7344	5.92766	13.0094
AT5G13590.1	Thhalv10012490m	11.2346	9.53905	13.5159	8.43544	7.16258	10.7566	12.6228	2.67009	5.01143
AT5G13650.1	Thhalv10012883m	159.046	280.93	110.683	133.431	278.555	115.799	94.5148	157.726	162.009
AT5G13680.1	Thhalv10012453m	9.11596	8.31378	10.0277	6.28715	5.06302	8.07355	6.92736	5.0715	5.05286
AT5G13950.1	Thhalv10012594m	17.3244	15.6499	15.8306	25.4548	10.8754	15.538	23.0312	9.49586	13.9654
AT5G13980.1	Thhalv10012546m	44.5881	44.7566	35.1976	26.8336	37.1407	37.8622	34.5951	24.4975	31.6012
AT5G14580.1	Thhalv10012572m	2.69189	3.42516	3.13204	1.10611	2.01783	2.40622	0.703705	2.37748	2.66944
AT5G14720.1	Thhalv10012878m	36.52	33.6614	30.4047	32.2254	28.3513	35.2917	45.2951	22.2565	32.1363
AT5G15400.1	Thhalv10012542m	18.0487	14.9978	19.2588	17.0998	16.7724	17.263	27.4521	12.2883	26.0832
AT5G15540.1	Thhalv10012417m	8.09282	7.28657	9.098	6.7798	6.88849	7.99843	8.8828	2.97479	8.06636
AT5G15680.1	Thhalv10012410m	10.0889	7.02323	11.8505	6.97374	8.2034	10.0568	9.0782	4.30049	11.0929
AT5G15700.1	Thhalv10012544m	3.34636	3.3388	3.42984	2.51382	4.59298	4.96163	2.58813	3.29136	4.27094
AT5G15810.1	Thhalv10013036m	17.1524	15.0079	22.2847	10.0542	10.931	19.0868	14.7599	16.163	19.5561
AT5G15920.1	Thhalv10012535m	5.49879	4.68599	5.35629	2.35864	2.93661	5.79427	3.38318	1.85489	4.65871
AT5G16260.1	Thhalv10013396m	15.1655	12.2946	14.0834	15.8456	11.8918	13.9923	17.7214	14.532	22.8014
AT5G16610.1	Thhalv10012945m	5.69324	5.8054	7.13655	4.85881	5.89726	5.32654	6.11745	5.25458	6.29541
AT5G16630.1	Thhalv10012651m	6.48848	6.3822	7.5628	4.66258	9.03724	6.23363	10.4858	1.77639	3.6282
AT5G16680.1	Thhalv10012458m	10.2481	8.41958	12.5324	9.15229	9.97499	11.9725	14.9265	7.86966	16.2855
AT5G17020.1	Thhalv10012517m	27.354	23.1144	30.4693	16.3492	19.484	24.5515	20.1478	23.1546	35.5577
AT5G17250.1	Thhalv10012592m	4.98493	3.45679	4.06914	2.62483	4.44694	3.82108	3.9396	3.37209	4.41972
AT5G17410.1	Thhalv10012868m	9.07533	7.86853	7.63645	4.95166	4.15337	7.00702	4.98676	8.25259	9.99726
AT5G17930.1	Thhalv10012737m	11.4911	8.99186	12.8264	5.75076	5.70949	11.6656	7.83802	8.59557	16.3041
AT5G18190.1	Thhalv10012841m	27.0396	20.3672	25.6897	19.4724	25.832	23.9085	24.4908	20.5014	37.5979
AT5G18410.1	Thhalv10012457m	13.5602	15.6824	13.2483	10.5775	12.7575	11.1401	11.0263	7.0387	10.2936
AT5G18525.1	Thhalv10012423m	6.67114	6.34585	6.05959	6.37402	9.03553	7.2781	12.646	3.64002	8.66548
AT5G18620.1	Thhalv10012527m	13.9813	12.6049	14.9788	4.53407	4.747	12.7539	8.4806	13.6306	22.3261
AT5G18830.1	Thhalv10012721m	11.6212	12.1206	10.3503	5.23094	8.55397	10.958	5.26278	6.49405	11.0754
AT5G18960.1	Thhalv10012731m	14.0405	13.0229	14.1179	7.834	10.6788	15.6611	10.0076	7.46089	9.55133
AT5G19130.1	Thhalv10012831m	10.804	7.21061	9.10573	10.1406	8.29351	9.77166	10.9116	7.30273	9.78408
AT5G19280.1	Thhalv10013082m	12.8201	10.6006	11.1664	8.64238	9.46427	11.0753	14.9994	6.1274	10.8326
AT5G19390.1	Thhalv10012649m	20.9468	25.8906	18.9531	13.3195	25.2304	18.6905	12.7754	25.2384	34.5553
AT5G19400.1	Thhalv10012551m	28.25	22.2709	29.7121	23.371	26.5069	28.431	29.6491	19.4352	34.6164
AT5G19420.1	Thhalv10012507m	4.98699	3.22558	5.761	3.00647	4.2171	5.74699	5.85896	3.5569	7.82534
AT5G19450.1	Thhalv10013210m	30.7366	24.3919	25.4877	24.3966	28.738	30.3922	31.2206	29.4951	46.3599
AT5G19620.1	Thhalv10012770m	16.2811	26.0412	16.0346	13.7282	13.0239	13.2516	8.95235	16.3111	15.5753
AT5G19690.1	Thhalv10012742m	45.0042	38.6519	46.5889	38.6478	39.0627	49.7231	43.0473	32.5277	42.0182
AT5G19840.1	Thhalv10013262m	4.05422	4.72429	4.39344	3.90178	4.42907	4.2711	4.96429	2.76968	4.81746
AT5G19920.1	Thhalv10013007m	3.48583	3.66987	5.32746	1.977	2.09452	3.75227	2.0451	6.35544	4.32889
AT5G20200.1	Thhalv10012771m	13.335	11.9967	14.33	6.32628	10.2488	14.3795	12.4733	12.1927	12.3595
AT5G20300.1	Thhalv10012730m	10.0451	9.39193	8.77239	0.825378	11.5023	11.5548	9.77828	15.721	19.1278
AT5G20320.1	Thhalv10012426m	5.00565	5.74668	5.32954	4.1867	4.2544	7.10623	5.19833	4.0842	9.11791
AT5G20490.1	Thhalv10012431m	21.8574	15.3822	19.8236	14.3475	17.5667	18.9422	14.0566	10.8989	31.843
AT5G20610.1	Thhalv10012496m	10.8508	6.71123	9.56786	6.43224	6.36995	10.4749	12.8022	5.01369	7.24437
AT5G20680.1	Thhalv10013136m	7.87762	6.16561	8.01895	4.88255	6.13777	8.328	4.59487	8.43824	18.3519
AT5G20730.1	Thhalv10012513m	15.4488	12.5705	18.7925	9.02224	10.3903	16.6076	11.1746	7.71495	17.9789
AT5G20840.1	Thhalv10012697m	14.6671	12.5548	12.9342	13.4095	15.435	11.5661	16.1442	10.4076	16.5576
AT5G20890.1	Thhalv10013239m	77.7927	64.2725	81.0425	33.5757	35.9296	77.2322	48.9061	66.9472	59.2207
AT5G20980.1	Thhalv10012712m	4.25788	5.68195	5.49327	3.36963	4.38779	4.24897	1.85363	4.91762	5.2433
AT5G20990.1	Thhalv10012894m	28.2801	25.7921	28.5957	23.9289	21.0038	28.7376	38.1521	29.2289	43.0164
AT5G21222.1	Thhalv10012659m	15.211	24.844	15.8202	19.2015	20.5658	14.4468	14.6829	23.0252	30.487
AT5G22010.1	Thhalv10012587m	9.38331	10.1429	11.3893	5.69444	7.0047	9.36146	5.27463	9.17244	13.9276
AT5G22030.1	Thhalv10027354m	11.4018	9.47558	12.1869	7.45926	9.86223	11.4716	8.82019	0	0
AT5G22450.1	Thhalv10012493m	21.2669	13.0527	30.6225	14.7541	10.2115	19.0664	21.9368	10.0424	19.5472
AT5G22480.1	Thhalv10013358m	9.99947	11.7155	9.5608	6.40019	3.93832	7.08782	9.46118	20.3401	23.8314
AT5G22510.1	Thhalv10012973m	30.6788	41.9906	33.2865	19.3698	18.0634	12.3981	16.3727	20.6972	29.299
AT5G22760.1	Thhalv10012428m	6.94057	7.70343	8.52995	5.51405	7.68753	8.13136	7.62619	4.41256	9.29681
AT5G22820.1	Thhalv10013199m	3.26001	2.9003	2.86431	2.12225	4.58295	2.67463	2.49725	4.07474	6.23628
AT5G23080.1	Thhalv10003608m	9.26429	7.66723	8.77425	5.84341	9.10645	12.2158	10.2591	6.31293	7.70956
AT5G23110.1	Thhalv10003499m	4.23859	4.18785	6.28369	4.98736	5.10434	4.64666	7.19604	2.00476	7.85291
AT5G23150.1	Thhalv10003519m	10.2949	9.41853	11.8939	6.72851	8.82462	12.6233	10.0679	1.85656	7.81182
AT5G23430.1	Thhalv10005394m	8.19101	5.84105	8.73686	2.53559	2.93907	6.43411	1.61313	4.81467	7.70993
AT5G23450.1	Thhalv10003687m	26.467	23.9696	28.7466	19.4642	21.2848	26.5759	37.1639	16.0366	23.7842
AT5G23490.1	Thhalv10003713m	4.00466	6.40571	4.36915	6.2843	5.31056	5.80237	11.5832	6.38327	24.8493
AT5G23630.1	Thhalv10027626m	21.4409	14.7481	22.9206	14.6355	15.7871	22.0578	18.1075	2.43012	6.94075
AT5G23720.1	Thhalv10003616m	6.245	5.13086	5.41172	2.90396	5.13064	5.46904	5.08769	4.24103	6.19335
AT5G23880.1	Thhalv10003707m	9.10758	9.57019	13.03	7.47685	6.9994	10.8485	6.58084	7.78139	11.7052
AT5G23890.1	Thhalv10003612m	26.7108	35.8308	21.8017	12.7118	31.0319	26.0418	12.4472	15.9891	27.6761
AT5G24350.1	Thhalv10003502m	6.48845	6.96402	8.53447	5.59143	6.00818	7.30538	7.95708	2.65248	5.03768
AT5G24360.1	Thhalv10003683m	4.57065	8.07184	4.37773	5.76834	4.28538	5.41908	7.51387	6.89634	12.8181
AT5G24620.1	Thhalv10004269m	29.3949	40.4487	26.1169	46.5764	42.2412	21.244	34.396	0.703035	0.466641
AT5G24710.1	Thhalv10003520m	23.3082	17.9541	25.0643	19.2406	16.859	24.0778	14.9269	7.62764	14.2658
AT5G24740.1	Thhalv10003500m	4.58991	5.41441	4.9962	3.87994	4.39768	4.67748	5.13678	1.94483	4.86628
AT5G24810.1	Thhalv10003586m	41.2117	20.1725	29.7586	28.744	12.4406	17.5655	28.9264	9.86028	24.4571
AT5G25060.1	Thhalv10003609m	17.9076	15.3192	19.2354	11.2738	12.3215	16.5847	17.127	11.4828	14.7738
AT5G25150.1	Thhalv10003767m	8.87978	11.0432	11.0523	8.1908	9.11853	10.8333	11.3845	9.23376	10.9408
AT5G25270.1	Thhalv10003804m	29.9919	26.0307	31.0086	36.1115	30.0613	31.011	55.8491	16.3025	17.863
AT5G25780.1	Thhalv10027018m	13.0485	18.2686	20.3291	8.1971	11.4481	19.1926	10.3013	0	0
AT5G25900.1	Thhalv10004043m	21.6534	12.9315	23.7317	23.9036	35.1555	20.1539	21.1556	23.4542	31.2165
AT5G26160.1	Thhalv10003582m	1.24798	3.44723	0.806492	0.266559	0.506295	0.905583	0.324258	2.16132	3.09414
AT5G26240.1	Thhalv10003643m	15.0422	11.652	13.7894	17.7283	16.6962	15.5254	13.6532	7.13936	13.7381
AT5G26570.1	Thhalv10003634m	42.4995	83.519	32.7371	38.214	141.706	42.1998	50.7135	22.3516	27.938
AT5G26680.1	Thhalv10004386m	8.93793	9.1843	8.27915	3.20162	2.6846	7.94453	3.93866	14.3552	12.1973
AT5G26742.1	Thhalv10003698m	164.036	270.809	160.231	135.643	194.115	151.446	116.058	167.654	172.395
AT5G26760.1	Thhalv10003721m	8.41917	12.1928	9.51687	6.48645	10.4932	8.38081	11.4082	5.60649	6.85546
AT5G26850.1	Thhalv10003593m	29.8108	20.7057	29.4948	12.0562	11.3939	18.9477	6.0228	12.0957	13.7746
AT5G26860.1	Thhalv10003617m	9.54077	10.8853	14.6463	6.15646	9.66875	10.8926	4.10404	10.3789	14.7407
AT5G26910.1	Thhalv10003651m	11.4552	6.75314	8.32435	7.25075	6.53482	8.47976	6.48351	9.54427	10.022
AT5G27030.1	Thhalv10003550m	11.5672	7.62099	13.555	6.5626	4.43795	9.39908	6.5166	5.17834	14.5721
AT5G27220.1	Thhalv10003597m	0.811907	0.443905	1.57255	0.534963	0.645956	2.38054	0.494167	0	0
AT5G27270.1	Thhalv10003569m	2.94263	9.5094	6.91057	5.70677	3.08684	5.64797	3.9976	5.09108	8.181
AT5G27410.1	Thhalv10003627m	6.28636	11.1582	13.9984	8.96914	8.27405	11.4355	9.91595	14.665	16.1594
AT5G27450.1	Thhalv10004396m	17.3974	13.0081	18.4431	4.77788	6.75048	13.54	3.52039	10.2066	10.4729
AT5G27540.1	Thhalv10003793m	25.1467	23.1792	29.2282	17.5987	22.7963	25.0188	21.2042	26.7604	37.7247
AT5G27640.1	Thhalv10012255m	52.7605	37.2987	46.7155	32.7058	35.1071	59.4785	38.868	0.078297	0
AT5G27680.1	Thhalv10003644m	1.47371	1.80027	1.68676	0.29443	0.300432	1.28735	0.34919	1.90203	1.36956
AT5G27740.1	Thhalv10004490m	16.8382	19.3284	14.6393	11.1525	7.16263	14.4135	14.6164	7.88067	10.0517
AT5G27970.1	Thhalv10003510m	10.4984	11.2465	12.1977	10.6901	12.5623	10.6834	11.3919	4.76647	10.2858
AT5G28740.1	Thhalv10003625m	17.6058	14.6411	18.2503	7.84451	10.3413	19.7224	11.4349	14.6414	14.7604
AT5G35080.1	Thhalv10002066m	15.3555	9.85307	13.7005	15.9406	13.638	15.5527	14.8721	34.4243	47.0657
AT5G35160.1	Thhalv10024880m	4.16892	5.26699	28.7176	2.85832	2.46418	2.8634	3.99112	13.5884	10.8043
AT5G35180.1	Thhalv10003438m	39.7433	33.8012	32.093	25.7966	37.3297	31.5561	18.7265	21.4525	31
AT5G35200.1	Thhalv10003447m	23.1937	16.0743	16.6935	20.4185	12.975	27.8044	38.8104	17.9411	36.1639
AT5G35400.1	Thhalv10003453m	4.32613	4.16923	7.00508	3.13365	3.06426	3.06874	3.35192	4.17596	4.86857
AT5G35430.1	Thhalv10003437m	12.7614	10.0523	12.7344	8.68298	8.9906	11.1739	9.55623	12.3644	22.8475
AT5G35560.1	Thhalv10003439m	11.4702	10.8518	11.9525	17.2269	19.9077	13.1473	24.0425	8.87966	13.1672
AT5G35570.1	Thhalv10003786m	11.6787	9.74306	10.8588	10.8363	8.83553	10.3061	10.1149	10.0361	18.1343
AT5G35910.1	Thhalv10003636m	16.6301	14.7341	16.5134	10.7399	12.5219	16.3914	9.74395	12.2509	13.1939
AT5G35980.1	Thhalv10003604m	26.2625	26.9625	25.5251	24.5036	23.6866	26.7978	29.8927	13.641	26.3317
AT5G36210.1	Thhalv10003712m	28.4982	27.0527	5.64117	19.9182	23.1468	21.4212	19.2957	13.6022	19.0378
AT5G36880.1	Thhalv10027656m	58.8112	46.5567	63.4608	31.7563	39.228	57.6924	39.2931	33.247	46.349
AT5G36890.1	Thhalv10027734m	9.15089	13.5789	12.834	7.94188	9.67455	11.7839	6.6981	22.9849	29.9968
AT5G37020.1	Thhalv10018139m	12.7968	18.4539	14.3644	6.31898	12.1648	14.2238	8.83776	21.4504	29.7989
AT5G37310.1	Thhalv10027693m	25.3345	22.506	21.7446	7.28128	19.3836	24.5528	10.3998	9.08405	13.6779
AT5G37340.1	Thhalv10027733m	7.03674	3.6287	7.29418	4.26598	5.40187	6.23182	5.59391	8.12807	8.62514
AT5G37350.1	Thhalv10000120m	13.129	13.5159	10.9018	9.37476	6.66251	8.99344	5.38694	17.9538	18.9635
AT5G37370.1	Thhalv10027788m	32.0159	27.7734	35.3467	9.67714	8.46473	7.71442	37.5535	29.0456	27.026
AT5G37380.1	Thhalv10027781m	6.36499	7.91216	8.02358	5.54598	7.39991	8.67017	3.95155	6.30029	5.6452
AT5G37590.1	Thhalv10027712m	4.2845	7.78139	3.95883	3.86825	3.7571	4.94576	1.8327	2.95755	3.90488
AT5G37830.1	Thhalv10027622m	15.8445	14.1836	17.3921	12.2327	17.7613	17.8119	8.09687	9.59794	19.8595
AT5G38560.1	Thhalv10028338m	20.5093	16.4662	26.5666	12.3552	10.3085	20.4483	12.3153	7.78696	9.79211
AT5G38600.1	Thhalv10027714m	10.2697	8.38964	9.06667	4.9995	7.88573	6.92489	9.78398	8.19694	8.44905
AT5G38880.1	Thhalv10027646m	13.4996	9.67456	12.6046	7.54444	6.62296	13.6555	11.588	0.890928	0.229339
AT5G39040.1	Thhalv10027684m	17.03	16.1411	19.3954	18.437	16.9674	18.696	18.7616	17.3254	31.2389
AT5G39500.1	Thhalv10027619m	9.36045	5.76532	8.08386	4.91627	5.95149	8.31255	6.31227	5.72078	10.4099
AT5G39840.1	Thhalv10027648m	6.05627	3.8146	4.57873	1.60362	2.79937	4.45369	1.28807	2.88569	4.35411
AT5G39940.1	Thhalv10028129m	8.90342	10.9529	6.75711	6.45548	3.29157	6.04014	0.719286	8.26075	8.63361
AT5G39960.1	Thhalv10027686m	4.20577	6.60058	4.50735	2.11935	3.53186	4.29729	2.32411	5.43912	7.09168
AT5G40270.1	Thhalv10027741m	3.44695	6.01265	5.62356	3.64514	3.91496	5.49418	4.33918	9.2215	14.1026
AT5G40480.1	Thhalv10027618m	7.34995	12.1042	8.55125	5.4622	10.4907	9.44843	4.33216	5.41472	11.3452
AT5G40740.1	Thhalv10027657m	9.22985	6.85541	8.06338	4.02155	4.40272	6.2062	8.1784	6.49689	10.9887
AT5G40810.1	Thhalv10027856m	73.4482	89.7524	56.4271	61.9627	62.2187	56.9266	59.4282	47.9552	55.7876
AT5G40820.1	Thhalv10027615m	0.724105	0.672807	1.67784	1.39269	0.398905	1.21583	0.440861	1.48296	2.04723
AT5G40840.1	Thhalv10027644m	2.44814	1.34597	1.38959	0.372987	0.643583	1.05612	0.255538	1.9265	2.24931
AT5G41140.1	Thhalv10027632m	12.8005	12.284	15.4264	7.27843	11.459	8.01541	4.29571	22.1001	23.2559
AT5G41180.1	Thhalv10027677m	11.259	5.08635	10.1261	5.59508	2.03544	10.6021	5.95646	8.43531	17.2894
AT5G41480.1	Thhalv10027718m	4.63919	8.10323	5.7055	5.77139	7.83208	6.58965	6.88379	12.114	4.81749
AT5G41580.1	Thhalv10027658m	5.44347	4.69902	7.62994	10.9283	3.69089	7.09	12.6967	6.08208	12.0866
AT5G41940.1	Thhalv10027703m	19.0366	10.827	15.7416	13.4807	11.3793	20.3276	19.0508	24.9506	26.3822
AT5G42080.1	Thhalv10027689m	76.8565	66.5633	80.6585	54.7989	50.527	60.8495	58.0981	43.8875	57.6034
AT5G42220.1	Thhalv10003631m	17.3272	17.5035	20.359	14.8959	15.2281	15.8736	16.7641	13.7296	25.7933
AT5G42390.1	Thhalv10003133m	36.9887	60.0992	40.3425	45.4374	53.3996	35.0909	36.9995	32.1806	53.4674
AT5G42400.1	Thhalv10003132m	4.84924	5.56531	5.86532	3.98526	5.47495	6.96872	4.87824	4.04685	11.4822
AT5G42540.1	Thhalv10009553m	23.1227	22.4209	23.9078	17.2568	13.3094	25.9032	15.3365	5.23074	9.49781
AT5G42740.1	Thhalv10003173m	36.762	51.1368	33.7257	22.508	36.6904	33.5941	18.7996	28.6646	33.4623
AT5G42870.1	Thhalv10003142m	18.0907	9.47632	15.3435	11.6365	9.16283	13.5748	19.7126	5.33214	11.4617
AT5G42940.1	Thhalv10003162m	17.6411	10.3193	16.8816	9.01567	9.52999	18.9167	15.9622	3.53014	7.21147
AT5G43130.1	Thhalv10003149m	17.4243	15.4898	17.8746	12.6916	11.8606	18.0356	22.8456	10.8998	14.1531
AT5G43745.1	Thhalv10003159m	8.91431	16.317	10.203	9.88748	26.4976	11.3488	5.46658	4.96758	12.8854
AT5G43820.1	Thhalv10003177m	1.1038	1.99395	1.16149	1.11401	1.42697	2.10154	1.12823	1.48862	2.57888
AT5G43900.1	Thhalv10003130m	18.4289	13.3542	17.7236	17.2531	13.8102	16.2007	16.1602	5.08277	12.2291
AT5G43990.1	Thhalv10003157m	4.03153	5.55324	4.45103	1.62282	2.26765	4.08644	0.201065	5.16384	8.23358
AT5G44090.1	Thhalv10003178m	17.7507	16.8835	15.0413	17.8036	16.0733	18.0157	29.6958	15.8751	24.2518
AT5G44180.1	Thhalv10003435m	13.8109	11.4048	14.148	13.4116	13.928	15.0467	16.9153	16.6509	14.8539
AT5G44240.1	Thhalv10003135m	14.7702	13.1202	16.4865	11.3452	14.0492	15.7535	15.8546	5.8414	12.4294
AT5G44750.1	Thhalv10000766m	15.214	18.2716	12.0527	7.09389	9.39095	8.28415	11.0585	0.469399	1.96274
AT5G44800.1	Thhalv10000738m	9.98157	9.71105	10.6363	7.43081	8.38683	10.3658	9.93516	3.82694	7.99991
AT5G45140.1	Thhalv10000748m	6.90864	7.96424	6.94949	2.84701	4.89909	7.7299	3.22346	6.25338	9.78321
AT5G45290.1	Thhalv10000852m	11.6159	10.1032	12.504	4.97996	6.00249	10.6627	5.66008	6.79943	8.16807
AT5G45430.1	Thhalv10000881m	104.001	123.911	103.144	154.455	191.155	111.112	114.051	51.6753	75.2645
AT5G45560.1	Thhalv10000794m	5.45286	4.40575	8.07045	2.95164	3.41391	4.75526	3.35233	5.02967	7.50208
AT5G45780.1	Thhalv10000817m	2.76727	4.2139	2.42844	1.33302	2.46773	2.72308	2.18184	2.30661	0.840863
AT5G45900.1	Thhalv10000804m	6.18242	5.07988	7.9255	6.0375	5.43054	6.352	9.75718	5.99868	12.3939
AT5G46070.1	Thhalv10000755m	13.6174	12.0998	15.2523	7.07485	8.29307	12.677	8.77629	17.5084	17.0049
AT5G46400.1	Thhalv10000754m	5.7574	5.3658	5.38558	3.41978	5.01398	5.92145	5.56088	1.56798	2.94307
AT5G46410.1	Thhalv10000883m	17.3491	6.54924	9.81392	12.1217	8.51276	15.1427	20.7289	8.76903	20.7614
AT5G46910.1	Thhalv10000785m	5.54238	2.99511	8.00497	2.38343	1.52792	3.9971	1.51571	1.10667	2.95475
AT5G47010.1	Thhalv10000743m	29.3132	31.4053	31.4562	21.5473	25.9716	31.4189	25.2999	14.9577	30.8335
AT5G47020.1	Thhalv10000740m	17.5444	15.1548	16.5812	12.3872	23.8471	18.2449	16.9747	5.22366	12.4702
AT5G47480.1	Thhalv10000734m	20.5469	15.6175	21.5992	16.59	20.071	14.8392	20.3938	6.28588	14.8327
AT5G47490.1	Thhalv10000744m	6.43824	6.93656	6.85041	3.47066	5.88288	7.22498	3.60271	3.37474	6.95175
AT5G47690.1	Thhalv10000739m	30.3881	27.0642	29.1921	24.9795	25.3292	30.4272	30.0171	14.2144	23.9237
AT5G48120.1	Thhalv10003552m	9.48961	8.01396	10.2928	6.57281	7.4031	8.85385	11.1082	4.25027	5.68909
AT5G48520.1	Thhalv10003836m	9.38001	8.87843	7.70857	6.19211	6.20731	7.43199	6.24487	9.93094	13.1266
AT5G48830.1	Thhalv10004024m	11.6228	19.2865	9.16844	10.0568	14.5178	12.1554	7.70456	16.3625	13.1129
AT5G49030.1	Thhalv10003524m	24.9873	48.561	25.985	28.7236	27.6298	19.7952	16.0969	24.7569	24.4541
AT5G49430.1	Thhalv10003509m	5.06925	5.52882	6.3444	6.1307	6.32657	8.3884	4.52885	2.60047	6.32463
AT5G49530.1	Thhalv10003751m	7.23677	6.66797	13.2806	5.80864	7.14852	7.99265	7.07356	3.2222	3.64347
AT5G49580.1	Thhalv10003750m	12.5358	11.2991	9.70516	11.3474	10.3778	11.3632	14.0088	10.9862	18.0232
AT5G49810.1	Thhalv10028379m	26.3158	21.1541	21.3567	14.7592	19.3406	18.6577	10.8688	21.6487	37.0933
AT5G49830.1	Thhalv10012711m	20.1888	15.9604	26.2142	20.5208	15.7276	21.1006	28.5607	19.0483	27.7667
AT5G50020.1	Thhalv10013681m	14.6502	15.7892	13.1863	9.28826	13.7796	14.9776	6.92831	7.51096	7.99648
AT5G50780.1	Thhalv10012707m	6.06319	3.72942	7.13632	5.05074	4.33324	7.14065	9.0813	5.03129	5.54003
AT5G50920.1	Thhalv10012603m	390.43	408.236	330.142	456.975	540.158	423.871	459.48	301.619	400.816
AT5G50960.1	Thhalv10021039m	30.1159	23.0673	31.3003	25.4517	21.0817	30.7384	31.3527	36.75	44.6376
AT5G51200.1	Thhalv10002339m	18.3799	13.1079	11.7559	6.48358	5.96892	15.3558	6.45178	7.80387	12.4741
AT5G51340.1	Thhalv10012792m	12.6396	11.2796	14.7851	9.9408	9.56546	16.0115	13.9137	5.04542	10.7291
AT5G51450.1	Thhalv10014220m	6.74688	7.93525	5.52738	6.33617	8.8989	6.63262	5.68447	5.47166	8.41144
AT5G51540.1	Thhalv10012823m	4.39966	5.71882	7.11925	2.93147	2.01194	4.36941	2.3514	3.18876	3.30043
AT5G51660.1	Thhalv10012441m	8.25971	10.906	9.4124	5.57866	11.3588	8.88615	3.06923	4.25071	7.41336
AT5G52040.1	Thhalv10014293m	50.5969	50.7037	60.4401	31.4901	33.1227	58.6795	39.8155	133.538	114.575
AT5G52530.1	Thhalv10024596m	20.3384	21.2959	21.492	12.8539	13.6712	19.9369	19.0705	16.9076	24.7984
AT5G53060.1	Thhalv10012933m	5.13223	5.29115	8.51008	4.87041	2.89492	8.05264	6.59179	6.28206	7.82201
AT5G53140.1	Thhalv10013676m	71.7669	74.2079	68.6595	43.3956	67.7234	66.1604	53.0399	38.3693	36.7979
AT5G53150.1	Thhalv10010173m	7.33702	8.96704	4.56073	3.27004	5.72669	8.59697	3.99103	6.22967	8.68564
AT5G53180.1	Thhalv10016110m	15.5235	21.815	21.5786	17.5698	15.9872	15.6506	18.7843	26.3567	29.6201
AT5G53440.1	Thhalv10012484m	16.6235	10.9287	14.0863	9.43233	11.0876	15.6131	17.0265	8.93969	12.6009
AT5G53460.1	Thhalv10012414m	109.981	73.8563	173.29	64.5889	45.3632	159.105	65.6372	41.6738	82.4313
AT5G53480.1	Thhalv10012652m	28.8456	21.6126	29.5601	22.2771	27.8869	28.188	27.306	17.5257	24.5769
AT5G54280.1	Thhalv10012475m	8.13799	8.31529	9.33076	3.53614	5.92606	6.07259	7.84172	2.70093	6.49564
AT5G54310.1	Thhalv10013423m	42.6578	31.982	41.1707	44.92	41.5895	40.2141	94.8044	19.3305	21.2103
AT5G54780.1	Thhalv10013605m	5.75067	3.92649	6.32116	4.16319	2.43701	4.67644	6.60549	7.03365	6.25439
AT5G54830.1	Thhalv10012618m	8.03841	3.7048	5.87493	3.87241	3.98135	4.28803	5.66722	3.39545	4.63029
AT5G55000.1	Thhalv10014237m	15.8037	12.5869	14.3792	15.3462	10.5089	15.1682	21.1751	9.88205	15.5992
AT5G55130.1	Thhalv10013463m	13.5949	14.4797	13.046	13.1014	10.237	15.3818	20.5912	15.2025	14.1199
AT5G55310.1	Thhalv10012622m	15.6048	14.6117	22.2248	11.041	16.3843	16.2917	18.8619	5.69164	14.8475
AT5G55390.1	Thhalv10012452m	9.26759	9.79771	8.73153	7.89673	10.2471	10.6297	15.7558	4.34362	11.0295
AT5G55660.1	Thhalv10012729m	40.6708	33.7484	46.4351	18.1013	25.4895	34.077	22.2676	43.7946	57.2729
AT5G55670.1	Thhalv10012809m	14.6516	11.3471	15.4167	7.2303	8.61023	14.5934	11.2759	11.7581	15.5598
AT5G56730.1	Thhalv10012682m	7.35655	6.16706	7.77374	5.10022	4.93786	7.363	8.91792	5.66952	8.01331
AT5G56890.1	Thhalv10012693m	14.9285	12.6185	15.4868	7.9851	13.2635	17.386	5.40433	7.56064	10.8819
AT5G57020.1	Thhalv10013589m	35.6576	25.7154	36.4143	27.3252	24.947	30.3461	51.2469	27.9016	25.2143
AT5G57110.1	Thhalv10012523m	35.3788	30.479	27.6307	10.6464	47.041	20.7329	16.9801	11.573	11.7661
AT5G57210.1	Thhalv10012758m	5.66891	6.02036	5.43999	4.13354	5.05755	6.08417	4.78966	6.81102	6.95182
AT5G57360.1	Thhalv10013003m	15.6077	17.9931	11.4869	19.6303	19.3755	14.4223	17.7336	13.8025	15.9921
AT5G57610.1	Thhalv10012514m	5.99796	7.17816	4.94886	6.1008	12.9158	6.28561	4.37278	4.94776	11.4283
AT5G57870.1	Thhalv10024066m	59.4207	52.694	76.6184	35.0645	35.9794	72.8349	49.0641	0	0
AT5G58040.1	Thhalv10012479m	22.7457	14.3224	23.9006	12.3443	13.8866	24.5495	23.1977	8.99252	16.6532
AT5G58100.1	Thhalv10012595m	20.7064	21.4375	16.5872	15.4128	18.3697	16.2135	16.7195	13.5427	21.2782
AT5G58410.1	Thhalv10012416m	8.53795	6.67343	8.75243	6.52696	7.28865	10.3019	11.0754	3.50528	8.63133
AT5G58510.1	Thhalv10012586m	9.47555	7.54269	9.55762	9.62914	9.19673	9.12841	13.295	6.99695	11.2812
AT5G58950.1	Thhalv10013257m	56.1846	73.0103	44.8911	50.689	51.7157	52.9019	84.4348	61.307	67.6836
AT5G60040.1	Thhalv10012446m	3.15161	3.20432	4.15768	1.50276	1.98849	3.06718	1.06677	0.956283	2.79712
AT5G60410.1	Thhalv10012623m	25.411	21.5768	28.2741	22.6447	22.0309	54.0108	40.0985	10.8978	26.2362
AT5G60570.1	Thhalv10016074m	28.7419	23.8701	29.8497	12.518	13.921	28.2167	16.3521	19.1589	17.4886
AT5G61140.1	Thhalv10003505m	11.7037	10.8117	12.6417	9.99381	13.3673	13.6623	12.5407	2.07912	5.22698
AT5G61150.1	Thhalv10003808m	41.8363	27.5284	43.0955	25.0789	21.2108	41.6572	27.6105	24.2952	33.1386
AT5G61460.1	Thhalv10003566m	3.84664	3.95478	4.90899	2.00637	1.77125	5.33523	2.07952	3.70515	6.76787
AT5G61910.1	Thhalv10003523m	8.43466	6.82747	9.22029	8.0329	7.44664	8.98244	10.153	5.69785	12.2049
AT5G61960.1	Thhalv10003623m	22.9976	19.5617	23.6537	10.6926	19.2147	24.6013	22.5829	9.67852	24.969
AT5G61970.1	Thhalv10003854m	21.2284	19.4305	22.5136	13.3478	16.065	18.3298	17.8305	17.092	16.5112
AT5G62230.1	Thhalv10003615m	1.13401	1.7447	1.54174	0.121865	0.623553	1.48352	0.083025	1.03606	1.19945
AT5G62600.1	Thhalv10003602m	9.44724	7.12395	9.29378	5.89894	5.99184	7.47161	8.84058	8.28669	14.2635
AT5G62640.1	Thhalv10003972m	18.6269	17.0665	21.7723	14.015	12.8164	17.4985	15.7626	14.0472	13.8408
AT5G62670.1	Thhalv10003603m	38.1297	39.4778	26.0773	23.2128	44.3263	50.0586	22.4961	25.6395	37.469
AT5G63420.1	Thhalv10003624m	19.6698	41.804	22.3951	10.2408	20.8759	18.085	8.18778	14.5142	9.59055
AT5G63610.1	Thhalv10004142m	17.1212	9.62835	15.9981	11.7514	9.79907	19.9624	18.5226	8.84247	13.0322
AT5G63780.1	Thhalv10004833m	24.4763	45.5442	15.4951	33.9961	96.1845	14.1873	13.2268	19.0514	12.7949
AT5G63930.1	Thhalv10022488m	5.82584	3.03605	6.06472	2.04164	3.76239	6.56918	2.51548	2.6406	4.29886
AT5G63940.1	Thhalv10003727m	12.7937	14.3591	12.7282	5.48864	7.74759	14.1943	6.48217	9.51938	14.9561
AT5G63960.1	Thhalv10003565m	5.73995	5.82173	7.34435	2.89191	2.54947	5.19109	2.78948	6.17329	8.56473
AT5G64000.1	Thhalv10004505m	3.06866	2.36754	2.84659	6.14399	1.68529	6.20986	35.7892	6.92464	20.1258
AT5G64030.1	Thhalv10003654m	26.6745	21.4908	23.1532	14.5243	15.2988	20.4197	9.99872	20.1245	21.2792
AT5G64070.1	Thhalv10003553m	23.0308	17.4247	18.9792	17.033	19.066	21.2016	33.0806	10.8698	21.1853
AT5G64170.1	Thhalv10003831m	5.41927	5.74388	4.48205	24.4024	36.818	6.19035	9.09929	24.6829	59.7741
AT5G64220.1	Thhalv10003564m	12.4489	9.25855	12.5945	7.44857	7.54155	12.9786	8.75095	4.55419	9.18193
AT5G64420.1	Thhalv10003522m	11.8535	9.72055	15.2412	5.69286	8.32129	12.1456	9.7784	6.6866	6.53892
AT5G64580.1	Thhalv10003640m	19.0866	34.2191	19.957	17.826	19.0587	14.2626	8.90247	24.2445	26.1529
AT5G64740.1	Thhalv10003574m	129.791	50.8167	125.23	71.8925	70.2011	101.079	58.3745	42.362	49.9724
AT5G65440.1	Thhalv10015247m	16.2693	12.7071	19.2122	12.3121	7.5684	14.5932	13.6133	0.116258	0
AT5G65460.1	Thhalv10003525m	6.93513	9.44103	7.51502	3.78138	6.09741	6.16413	3.46794	18.6521	12.9773
AT5G65750.1	Thhalv10003576m	28.8452	16.0446	23.7374	17.32	10.3821	27.7493	24.0477	20.1161	41.2283
AT5G66030.1	Thhalv10003686m	30.987	22.5267	28.0459	16.346	21.035	27.4711	32.49	11.1395	19.6649
AT5G67530.1	Thhalv10003864m	11.4134	9.9236	11.2455	10.4437	9.03657	12.0888	12.1758	7.74383	11.6801

## Sheet: TableS2
Accession	Mean	SEM
Shandong	0.971687	0.0102851
Eds-9	1.01304	0.0103673
tv-7	1.05397	0.010068
Zal-1	1.08006	0.0107683
Col-0	1.10947	0.0095654
Yukon	1.12684	0.0101945
Bak-5	1.13564	0.00957573
UKID116	1.13923	0.00932979
Cvi-0	1.15175	0.00931123

## Sheet: TableS3
Gene	Wild type																					met1																					Group
	CG							CHG							CHH							CG							CHG							CHH
	Total seq.	Methylated seq.	Weighted	Nucl.	Methylated	P-value	FDR	Total seq.	Methylated seq.	Weighted	Nucl.	Methylated	P-value	FDR	Total seq.	Methylated seq.	Weighted	Nucl.	Methylated	P-value	FDR	Total seq.	Methylated seq.	Weighted	Nucl.	Methylated	P-value	FDR	Total seq.	Methylated seq.	Weighted	Nucl.	Methylated	P-value	FDR	Total seq.	Methylated seq.	Weighted	Nucl.	Methylated	P-value	FDR
AT1G01040.1	3514	2077	0.591064	347	237	0	0	4285	13	0.00303384	405	3	0.871125	1	16354	48	0.00293506	1664	4	0.507082	1	3045	9	0.00295567	346	0	1	1	3549	7	0.00197239	406	0	1	1	13148	30	0.00228172	1601	0	1	1	1
AT1G01220.1	1363	447	0.327953	152	59	5.14495e-05	0.000282378	2371	9	0.00379587	244	1	0.949711	1	8763	34	0.00387995	973	2	0.637518	1	1130	1	0.000884956	154	0	1	1	1770	4	0.00225989	248	0	1	1	6579	16	0.00243198	979	0	1	1	1
AT1G01320.1	3099	1191	0.384318	308	156	0	0	5086	11	0.0021628	489	0	1	1	15554	40	0.00257169	1519	2	0.851438	1	2303	5	0.00217108	313	0	1	1	3614	10	0.00276702	477	1	0.956073	1	10849	22	0.00202784	1480	0	1	1	1
AT1G01350.1	298	214	0.718121	50	41	0	0	560	0	0	74	0	1	1	1863	2	0.00107354	265	0	1	1	307	1	0.00325733	43	0	1	1	490	0	0	61	0	1	1	1521	3	0.00197239	224	1	0.261108	1	1
AT1G01440.1	792	294	0.371212	113	56	5.7634e-09	4.93554e-08	1215	5	0.00411523	162	2	0.588282	1	4365	9	0.00206186	576	0	1	1	855	55	0.0643275	122	6	0.923091	1	1140	3	0.00263158	168	0	1	1	4060	9	0.00221675	598	1	0.554182	1	1
AT1G01650.1	781	266	0.340589	98	41	0.000100576	0.000533577	1203	2	0.00166251	142	1	0.824491	1	4080	4	0.000980392	491	0	1	1	654	1	0.00152905	99	0	1	1	968	1	0.00103306	140	0	1	1	3101	5	0.00161238	488	0	1	1	1
AT1G01670.1	548	194	0.354015	58	29	2.05541e-05	0.000118559	794	6	0.00755668	82	0	1	1	3226	9	0.00278983	338	0	1	1	414	0	0	56	0	1	1	560	2	0.00357143	77	0	1	1	1982	3	0.00151362	318	0	1	1	1
AT1G01770.1	897	231	0.257525	103	34	0.0287927	0.107994	1512	4	0.0026455	175	1	0.882868	1	4770	9	0.00188679	563	0	1	1	712	2	0.00280899	106	0	1	1	1225	4	0.00326531	180	0	1	1	3563	8	0.0022453	553	0	1	1	1
AT1G01910.1	703	243	0.345661	81	34	0.000350989	0.001731	789	7	0.00887199	87	2	0.286282	1	3026	8	0.00264375	320	0	1	1	500	8	0.016	69	1	0.996427	1	547	2	0.00365631	78	0	1	1	1939	5	0.00257865	279	0	1	1	1
AT1G01950.1	1212	423	0.34901	143	64	7.46399e-08	5.63303e-07	2062	11	0.00533463	233	5	0.15712	1	7025	21	0.00298932	797	0	1	1	1079	0	0	144	0	1	1	1777	4	0.00225098	234	0	1	1	5903	10	0.00169405	813	0	1	1	1
AT1G01960.1	2392	804	0.33612	322	130	1.49309e-10	1.48723e-09	3851	13	0.00337575	460	5	0.659707	1	12371	35	0.0028292	1515	1	0.965855	1	1826	7	0.00383352	281	2	1	1	2813	6	0.00213295	413	0	1	1	9278	22	0.0023712	1381	0	1	1	1
AT1G01970.1	528	204	0.386364	64	31	2.42633e-05	0.000138457	754	6	0.00795756	83	0	1	1	3005	8	0.00266223	343	0	1	1	494	2	0.00404858	61	0	1	1	632	1	0.00158228	78	0	1	1	2700	3	0.00111111	351	0	1	1	1
AT1G02010.1	1077	408	0.37883	115	56	1.28564e-08	1.05867e-07	1685	8	0.00474777	167	3	0.33256	1	5588	8	0.00143164	579	1	0.724912	1	863	4	0.00463499	114	0	1	1	1277	2	0.00156617	162	0	1	1	4218	8	0.00189663	566	0	1	1	1
AT1G02050.1	584	247	0.422945	97	56	2.29672e-12	2.69491e-11	713	6	0.00841515	119	5	0.0156208	0.423057	2171	8	0.00368494	358	0	1	1	428	3	0.00700935	77	1	0.998141	1	485	1	0.00206186	88	0	1	1	1489	4	0.00268637	253	0	1	1	1
AT1G02080.1	3085	1284	0.416207	332	166	0	0	7113	29	0.00407704	712	9	0.50092	1	20691	58	0.00280315	2107	2	0.947971	1	2454	14	0.00570497	320	2	1	1	5481	19	0.00346652	686	0	1	1	15520	26	0.00167526	1998	0	1	1	1
AT1G02145.1	769	256	0.3329	73	28	0.00533422	0.0224458	1335	2	0.00149813	120	1	0.770185	1	4447	11	0.00247358	427	1	0.613969	1	527	0	0	67	0	1	1	919	3	0.00326442	116	0	1	1	2783	9	0.00323392	384	0	1	1	1
AT1G02305.1	424	89	0.209906	43	15	0.0787054	0.272443	1219	4	0.00328138	107	1	0.730498	1	3448	13	0.0037703	320	0	1	1	267	3	0.011236	43	0	1	1	765	0	0	98	0	1	1	2076	2	0.000963391	288	0	1	1	1
AT1G02420.1	1000	292	0.292	96	37	0.00136938	0.00625885	803	5	0.00622665	78	0	1	1	4029	11	0.00273021	425	1	0.612244	1	674	2	0.00296736	90	0	1	1	568	1	0.00176056	75	0	1	1	2613	4	0.00153081	396	0	1	1	1
AT1G02500.1	364	80	0.21978	60	28	0.000134463	0.000701261	593	1	0.00168634	91	1	0.672122	1	2229	8	0.00358905	344	0	1	1	493	1	0.0020284	75	0	1	1	624	1	0.00160256	105	0	1	1	2348	5	0.00212947	378	0	1	1	1
AT1G02520.1	1950	306	0.156923	307	90	0.0255862	0.0967771	1763	5	0.00283607	288	1	0.97067	1	6054	14	0.00231252	923	2	0.609037	1	1635	1	0.000611621	285	0	1	1	1470	2	0.00136054	258	1	0.815549	1	4635	13	0.00280475	835	0	1	1	1
AT1G02890.1	1886	861	0.456522	225	115	0	0	2921	15	0.00513523	327	4	0.564306	1	9923	22	0.00221707	1127	0	1	1	1527	3	0.00196464	217	0	1	1	2282	2	0.000876424	313	0	1	1	7576	14	0.00184794	1051	0	1	1	1
AT1G02910.1	987	473	0.47923	125	71	9.10383e-15	1.3406e-13	979	1	0.00102145	119	0	1	1	2827	8	0.00282985	344	0	1	1	846	19	0.0224586	129	3	0.99809	1	786	1	0.00127226	121	0	1	1	2229	8	0.00358905	350	0	1	1	1
AT1G02990.1	1184	662	0.559122	130	85	0	0	2174	6	0.00275989	226	0	1	1	8414	26	0.00309009	943	0	1	1	935	0	0	120	0	1	1	1621	2	0.00123381	207	0	1	1	6179	11	0.00178022	846	0	1	1	1
AT1G03000.1	1447	427	0.295093	165	64	2.61977e-05	0.000149211	2338	10	0.00427716	251	1	0.953845	1	7381	16	0.00216773	827	1	0.841736	1	1082	4	0.00369686	156	0	1	1	1744	3	0.00172018	244	0	1	1	5650	9	0.00159292	779	0	1	1	1
AT1G03060.1	3211	1996	0.621613	414	307	0	0	7343	23	0.00313223	917	4	0.995833	1	23810	44	0.00184796	2993	3	0.962044	1	2840	9	0.00316901	424	3	1	1	5941	12	0.00201986	888	1	0.997026	1	18842	45	0.00238828	2934	0	1	1	1
AT1G03100.1	894	354	0.395973	108	62	2.23599e-13	2.8955e-12	1499	5	0.00333556	175	1	0.882868	1	5920	13	0.00219595	692	0	1	1	792	2	0.00252525	89	0	1	1	1248	4	0.00320513	149	0	1	1	4814	14	0.00290818	593	0	1	1	1
AT1G03160.1	1810	496	0.274033	212	64	0.029751	0.111302	2102	3	0.00142721	227	0	1	1	6428	17	0.00264468	733	0	1	1	1737	21	0.0120898	212	2	0.999999	1	1751	3	0.00171331	226	0	1	1	5390	15	0.00278293	712	0	1	1	1
AT1G03310.1	1051	270	0.256898	120	38	0.0409248	0.149355	1781	12	0.00673779	200	0	1	1	7079	24	0.00339031	788	0	1	1	893	8	0.00895857	120	2	0.999378	1	1353	4	0.00295639	192	0	1	1	5229	9	0.00172117	750	0	1	1	1
AT1G03365.1	779	393	0.504493	95	57	1.51212e-13	1.98872e-12	1833	6	0.00327332	208	2	0.721352	1	4990	15	0.00300601	637	1	0.758275	1	698	0	0	88	0	1	1	1692	7	0.00413712	210	0	1	1	4477	7	0.00156355	600	0	1	1	1
AT1G03380.1	781	187	0.239437	106	37	0.00929148	0.0377344	2279	1	0.000438789	283	0	1	1	6996	15	0.00214408	851	0	1	1	622	0	0	100	0	1	1	1632	2	0.00122549	263	0	1	1	5032	15	0.00298092	815	0	1	1	1
AT1G03457.1	848	202	0.238208	92	32	0.0155893	0.061123	880	3	0.00340909	99	1	0.702739	1	3325	11	0.00330827	372	0	1	1	689	0	0	96	0	1	1	778	3	0.00385604	100	1	0.480652	1	2968	3	0.00101078	386	0	1	1	1
AT1G03550.1	669	212	0.316891	61	27	0.000507989	0.00244065	692	0	0	64	0	1	1	2865	13	0.00453752	266	0	1	1	511	9	0.0176125	61	2	0.957497	1	543	3	0.00552486	60	0	1	1	2303	4	0.00173686	258	1	0.294279	1	1
AT1G03560.1	1271	331	0.260425	138	47	0.006334	0.0263753	1016	3	0.00295276	108	0	1	1	4448	14	0.00314748	538	0	1	1	1103	2	0.00181324	144	0	1	1	860	4	0.00465116	110	0	1	1	3448	3	0.00087007	524	0	1	1	1
AT1G03770.1	889	252	0.283465	89	36	0.000559646	0.00268044	941	3	0.0031881	99	0	1	1	3416	8	0.00234192	387	0	1	1	745	0	0	94	0	1	1	756	0	0	102	0	1	1	2936	7	0.0023842	400	0	1	1	1
AT1G03830.1	1826	810	0.443593	212	125	0	0	2000	5	0.0025	220	2	0.749472	1	7666	20	0.00260892	847	1	0.848636	1	1561	5	0.00320307	208	1	1	1	1530	3	0.00196078	213	0	1	1	5433	7	0.00128842	802	0	1	1	1
AT1G03860.1	388	217	0.559278	56	38	7.51788e-12	8.47324e-11	561	1	0.00178253	79	0	1	1	2195	3	0.00136674	266	0	1	1	360	0	0	49	0	1	1	560	5	0.00892857	73	0	1	1	1847	1	0.000541419	250	0	1	1	1
AT1G03910.1	1373	580	0.422433	144	84	0	0	1387	6	0.00432588	145	0	1	1	4211	8	0.00189979	481	0	1	1	1057	1	0.000946074	141	0	1	1	1058	3	0.00283554	150	0	1	1	3465	8	0.0023088	486	0	1	1	1
AT1G03930.1	832	336	0.403846	99	50	1.65871e-08	1.34738e-07	1412	5	0.00354108	140	0	1	1	4185	12	0.00286738	402	0	1	1	684	1	0.00146199	97	0	1	1	1083	4	0.00369344	137	0	1	1	3197	5	0.00156397	397	0	1	1	1
AT1G04140.1	741	458	0.618084	91	61	0	0	2032	3	0.00147638	241	0	1	1	5960	13	0.00218121	700	0	1	1	698	1	0.00143266	98	0	1	1	1664	6	0.00360577	237	0	1	1	5101	8	0.00156832	689	0	1	1	1
AT1G04160.1	2393	1231	0.514417	238	147	0	0	4339	13	0.00299608	404	0	1	1	12820	29	0.00226209	1234	0	1	1	2024	1	0.000494071	244	0	1	1	3209	9	0.00280461	403	0	1	1	10116	31	0.00306445	1256	0	1	1	1
AT1G04200.1	1285	410	0.319066	118	46	0.000288755	0.00144006	2011	8	0.00397812	182	0	1	1	6963	26	0.00373402	647	1	0.763604	1	870	4	0.0045977	111	0	1	1	1469	5	0.00340368	175	0	1	1	4912	13	0.00264658	620	0	1	1	1
AT1G04210.1	1761	807	0.458262	178	90	3.86358e-14	5.34189e-13	2511	10	0.00398248	261	2	0.827773	1	9484	29	0.00305778	974	0	1	1	1303	12	0.00920952	175	2	0.99999	1	1773	8	0.00451213	253	0	1	1	6723	18	0.00267738	950	0	1	1	1
AT1G04390.1	1255	608	0.484462	153	93	0	0	1925	5	0.0025974	225	0	1	1	7738	23	0.00297234	923	0	1	1	1082	1	0.000924214	152	0	1	1	1622	3	0.00184957	219	0	1	1	6181	11	0.00177965	895	0	1	1	1
AT1G04430.1	1082	391	0.361368	130	65	2.2446e-10	2.19256e-09	1367	9	0.00658376	139	1	0.817919	1	4936	20	0.00405186	536	0	1	1	1083	32	0.0295476	135	5	0.98339	1	1125	1	0.000888889	141	0	1	1	4245	17	0.00400471	541	0	1	1	1
AT1G04440.1	728	242	0.332418	72	25	0.0306125	0.114329	1293	5	0.00386698	127	0	1	1	4523	14	0.00309529	438	1	0.623319	1	486	3	0.00617284	70	0	1	1	854	2	0.00234192	122	0	1	1	2962	7	0.00236327	406	0	1	1	1
AT1G04510.1	1109	558	0.503156	101	62	2.88658e-15	4.42446e-14	1937	3	0.00154879	173	0	1	1	4692	10	0.00213129	432	0	1	1	831	0	0	101	0	1	1	1357	0	0	168	0	1	1	3227	3	0.000929656	409	0	1	1	1
AT1G04590.1	915	167	0.182514	79	28	0.0174576	0.0678993	1051	7	0.00666032	88	2	0.29078	1	3844	12	0.00312175	333	1	0.523982	1	589	1	0.00169779	79	0	1	1	666	0	0	86	0	1	1	2471	8	0.00323756	327	0	1	1	1
AT1G04620.1	786	214	0.272265	63	22	0.0382949	0.140312	1450	5	0.00344828	117	0	1	1	5476	12	0.00219138	423	0	1	1	497	3	0.00603622	63	0	1	1	920	2	0.00217391	113	0	1	1	3227	4	0.00123954	393	0	1	1	1
AT1G04700.1	1516	600	0.395778	164	87	2.66454e-15	4.09458e-14	2473	13	0.00525677	251	3	0.590879	1	8530	25	0.00293083	900	0	1	1	1109	11	0.00991885	164	2	0.999977	1	1738	6	0.00345224	250	0	1	1	6121	15	0.00245058	884	0	1	1	1
AT1G04730.1	1582	575	0.363464	163	69	3.29583e-07	2.33634e-06	2271	6	0.00264201	222	1	0.934151	1	8226	22	0.00267445	838	0	1	1	1157	12	0.0103717	163	2	0.999975	1	1596	3	0.0018797	217	0	1	1	5963	8	0.00134161	829	0	1	1	1
AT1G04790.1	897	529	0.589744	118	93	0	0	1403	2	0.00142552	175	2	0.630137	1	4292	9	0.00209692	509	0	1	1	792	6	0.00757576	120	2	0.999378	1	1158	3	0.00259067	170	0	1	1	3280	11	0.00335366	497	0	1	1	1
AT1G04810.1	1128	484	0.429078	142	74	9.62563e-13	1.17394e-11	2335	5	0.00214133	284	3	0.673166	1	7718	13	0.00168437	917	0	1	1	908	4	0.00440529	139	1	0.999988	1	1755	1	0.000569801	275	0	1	1	5460	7	0.00128205	868	0	1	1	1
AT1G04850.1	736	307	0.41712	78	36	2.15158e-05	0.000123883	847	4	0.00472255	92	0	1	1	3622	8	0.00220872	397	0	1	1	503	0	0	75	0	1	1	607	1	0.00164745	87	0	1	1	2508	4	0.0015949	386	0	1	1	1
AT1G04860.1	1136	623	0.548415	146	97	0	0	1862	6	0.00322234	227	2	0.76472	1	6013	17	0.00282721	772	0	1	1	1092	0	0	154	0	1	1	1705	3	0.00175953	233	0	1	1	5366	11	0.00204994	763	0	1	1	1
AT1G04910.1	985	379	0.384772	125	68	5.4956e-13	6.82732e-12	1077	3	0.00278552	128	1	0.791645	1	3549	6	0.00169062	427	1	0.613969	1	884	0	0	116	0	1	1	918	3	0.00326797	124	0	1	1	3032	4	0.00131926	413	0	1	1	1
AT1G04950.1	678	232	0.342183	70	24	0.0389201	0.142397	1451	6	0.00413508	147	0	1	1	4642	15	0.00323137	473	0	1	1	579	1	0.00172712	74	0	1	1	1177	1	0.000849618	152	0	1	1	3823	9	0.00235417	491	0	1	1	1
AT1G05055.1	721	169	0.234397	87	28	0.0592835	0.210357	990	2	0.0020202	111	1	0.743389	1	3096	4	0.00129199	372	0	1	1	562	0	0	91	0	1	1	772	3	0.00388601	112	0	1	1	2344	4	0.00170648	370	0	1	1	1
AT1G05120.1	1097	333	0.303555	112	45	0.000149097	0.000770814	1814	5	0.00275634	197	2	0.693274	1	6915	21	0.00303688	729	0	1	1	825	3	0.00363636	106	0	1	1	1467	4	0.00272665	182	0	1	1	5390	12	0.00222635	703	0	1	1	1
AT1G05160.1	678	217	0.320059	74	34	4.04026e-05	0.000224495	1169	7	0.00598802	120	0	1	1	4366	14	0.0032066	450	0	1	1	574	0	0	74	0	1	1	927	1	0.00107875	118	0	1	1	3475	7	0.00201439	451	0	1	1	1
AT1G05200.1	1365	571	0.418315	171	91	4.44089e-16	7.22206e-15	1907	11	0.00576822	233	2	0.777141	1	6915	17	0.00245842	834	0	1	1	1125	2	0.00177778	174	0	1	1	1528	4	0.0026178	227	1	0.77401	1	5377	11	0.00204575	827	0	1	1	1
AT1G05360.1	603	179	0.296849	62	24	0.00830483	0.0340124	1070	2	0.00186916	103	0	1	1	3809	10	0.00262536	366	0	1	1	533	1	0.00187617	61	0	1	1	808	1	0.00123762	100	0	1	1	2947	6	0.00203597	358	0	1	1	1
AT1G05380.1	1233	487	0.394972	151	70	3.11204e-09	2.73334e-08	2204	10	0.00453721	255	3	0.601534	1	8089	20	0.00247249	995	0	1	1	1089	1	0.000918274	136	0	1	1	1712	3	0.00175234	233	0	1	1	6198	7	0.0011294	894	0	1	1	1
AT1G05410.1	738	253	0.342818	80	37	1.57036e-05	9.18281e-05	1241	3	0.00241741	133	0	1	1	3945	7	0.0017744	417	1	0.605267	1	583	0	0	75	0	1	1	1007	3	0.00297915	124	0	1	1	2773	7	0.00252434	392	0	1	1	1
AT1G05460.1	990	353	0.356566	115	52	8.0178e-07	5.44863e-06	1909	1	0.000523834	210	0	1	1	7566	22	0.00290775	887	0	1	1	839	0	0	117	0	1	1	1419	3	0.00211416	201	0	1	1	5601	16	0.00285663	816	0	1	1	1
AT1G05470.1	774	194	0.250646	99	43	2.35021e-05	0.000134161	1312	10	0.00762195	160	2	0.581538	1	4835	20	0.0041365	557	0	1	1	775	1	0.00129032	99	0	1	1	1232	3	0.00243506	164	0	1	1	4058	7	0.00172499	559	0	1	1	1
AT1G05520.1	1225	332	0.27102	163	55	0.00421161	0.0179758	1787	1	0.000559597	219	0	1	1	5475	14	0.00255708	674	1	0.777412	1	1104	2	0.00181159	157	1	0.999997	1	1513	3	0.00198282	209	0	1	1	4351	13	0.00298782	646	1	0.582173	1	1
AT1G05600.1	698	146	0.209169	70	22	0.107655	0.361265	994	3	0.00301811	99	0	1	1	3787	10	0.00264061	437	1	0.622479	1	540	2	0.0037037	73	1	0.997423	1	746	2	0.00268097	102	0	1	1	2950	9	0.00305085	435	0	1	1	1
AT1G05630.1	1527	676	0.442698	247	109	7.87115e-12	8.86724e-11	2253	6	0.00266312	318	4	0.542409	1	6967	22	0.00315774	1001	2	0.652741	1	1309	2	0.00152788	212	0	1	1	1747	2	0.00114482	278	0	1	1	5578	12	0.00215131	929	0	1	1	1
AT1G05670.1	677	218	0.322009	79	36	3.03081e-05	0.00017126	1272	5	0.00393082	146	0	1	1	5625	18	0.0032	644	1	0.762018	1	554	2	0.00361011	79	0	1	1	1068	4	0.00374532	144	0	1	1	4480	9	0.00200893	635	0	1	1	1
AT1G05790.1	1308	348	0.266055	140	48	0.00507547	0.0214303	1891	13	0.00687467	185	2	0.660017	1	6077	22	0.00362021	597	3	0.149514	1	1045	4	0.00382775	141	1	0.99999	1	1405	3	0.00213523	182	0	1	1	4621	10	0.00216403	595	0	1	1	1
AT1G05830.1	1882	908	0.482465	193	101	0	0	2697	10	0.00370782	259	2	0.824531	1	9234	20	0.00216591	935	4	0.15776	1	1428	1	0.00070028	188	0	1	1	1904	6	0.00315126	250	1	0.805623	1	6670	13	0.00194903	907	0	1	1	1
AT1G05910.1	1509	797	0.528164	175	111	0	0	3037	9	0.00296345	344	4	0.604032	1	7900	15	0.00189873	929	0	1	1	1369	7	0.00511322	179	1	1	1	2494	5	0.00200481	335	0	1	1	6476	21	0.00324274	888	0	1	1	1
AT1G05950.1	970	261	0.269072	92	35	0.00234997	0.0103961	1676	5	0.00298329	149	1	0.838919	1	5913	21	0.0035515	563	2	0.356754	1	703	2	0.00284495	87	0	1	1	1120	0	0	144	0	1	1	4043	9	0.00222607	547	0	1	1	1
AT1G05960.1	1155	457	0.395671	121	62	1.58593e-10	1.57579e-09	2574	5	0.0019425	262	1	0.959665	1	8752	19	0.00217093	850	0	1	1	988	2	0.00202429	121	0	1	1	2087	5	0.00239578	260	0	1	1	6758	10	0.00147973	820	0	1	1	1
AT1G06140.1	1013	193	0.190523	113	37	0.0264815	0.0999348	779	0	0	92	0	1	1	3732	10	0.00267953	472	0	1	1	671	1	0.00149031	89	0	1	1	565	0	0	80	0	1	1	2303	5	0.00217108	354	0	1	1	1
AT1G06150.1	678	260	0.383481	83	38	1.61998e-05	9.45334e-05	1614	4	0.00247831	170	0	1	1	6402	16	0.00249922	671	0	1	1	603	1	0.00165837	84	0	1	1	1192	2	0.00167785	165	0	1	1	4724	11	0.00232854	672	0	1	1	1
AT1G06210.1	511	183	0.358121	56	26	0.000255173	0.00128284	982	0	0	100	0	1	1	3278	10	0.00305064	349	0	1	1	414	1	0.00241546	55	0	1	1	743	3	0.00403769	96	0	1	1	2424	10	0.00412541	324	0	1	1	1
AT1G06230.1	658	183	0.278116	83	30	0.010586	0.042631	1603	4	0.00249532	185	2	0.660017	1	5598	17	0.0030368	687	1	0.78377	1	545	3	0.00550459	81	2	0.989417	1	1252	6	0.00479233	181	0	1	1	4269	5	0.00117123	663	0	1	1	1
AT1G06240.1	609	181	0.297209	77	28	0.0121	0.0482744	586	0	0	76	0	1	1	2484	4	0.00161031	330	0	1	1	465	0	0	69	0	1	1	466	0	0	70	0	1	1	1885	2	0.00106101	278	0	1	1	1
AT1G06410.1	1026	682	0.664717	144	118	0	0	1438	6	0.00417246	191	2	0.676995	1	5227	17	0.00325234	709	1	0.794118	1	960	2	0.00208333	137	0	1	1	1289	3	0.00232739	185	0	1	1	4465	11	0.00246361	671	0	1	1	1
AT1G06490.1	3462	1034	0.298671	346	140	2.53575e-11	2.70911e-10	4081	14	0.00343053	392	3	0.856633	1	18028	59	0.00327269	1757	0	1	1	2524	8	0.00316957	346	1	1	1	2990	0	0	383	0	1	1	13035	23	0.00176448	1730	1	0.90339	1	1
AT1G06550.1	664	172	0.259036	63	24	0.0103769	0.0418241	1015	1	0.000985222	95	1	0.687806	1	3632	17	0.00468062	355	0	1	1	516	0	0	63	0	1	1	798	1	0.00125313	95	0	1	1	2973	4	0.00134544	351	0	1	1	1
AT1G06560.1	1016	303	0.298228	104	42	0.000213021	0.00107827	1749	5	0.00285878	171	0	1	1	5332	3	0.000562641	546	0	1	1	833	6	0.00720288	94	0	1	1	1296	2	0.00154321	160	0	1	1	4058	8	0.00197141	509	0	1	1	1
AT1G06580.1	696	183	0.262931	72	26	0.0167299	0.0653495	814	3	0.0036855	83	1	0.638351	1	3984	5	0.00125502	416	0	1	1	609	1	0.00164204	72	0	1	1	723	0	0	87	0	1	1	3023	7	0.00231558	415	0	1	1	1
AT1G06590.1	1380	453	0.328261	138	54	8.10069e-05	0.000433787	2206	4	0.00181324	203	1	0.916888	1	8736	24	0.00274725	829	0	1	1	1019	15	0.0147203	135	3	0.998728	1	1565	2	0.00127796	199	0	1	1	6122	14	0.00228683	811	0	1	1	1
AT1G06670.1	1990	980	0.492462	234	144	0	0	3318	18	0.00542495	383	2	0.947605	1	10666	45	0.00421901	1281	3	0.54315	1	1728	29	0.0167824	241	6	0.999893	1	2657	3	0.00112909	383	0	1	1	8524	15	0.00175974	1269	0	1	1	1
AT1G06710.1	1057	211	0.199622	110	32	0.145205	0.473407	1934	6	0.00310238	199	1	0.912712	1	8239	23	0.0027916	881	2	0.583817	1	736	0	0	107	0	1	1	1362	3	0.00220264	195	0	1	1	5889	16	0.00271693	855	0	1	1	1
AT1G06780.1	881	234	0.265607	98	34	0.013522	0.0535599	1166	3	0.0025729	127	0	1	1	4686	10	0.00213402	525	1	0.689724	1	721	0	0	100	0	1	1	932	0	0	128	0	1	1	3839	6	0.00156291	512	0	1	1	1
AT1G06840.1	1470	719	0.489116	159	97	0	0	2292	3	0.0013089	238	1	0.945875	1	7449	21	0.00281917	800	0	1	1	1196	3	0.00250836	153	0	1	1	1808	0	0	221	0	1	1	5655	19	0.00335986	737	0	1	1	1
AT1G06900.1	1523	756	0.496389	141	81	0	0	2475	5	0.0020202	212	0	1	1	10219	24	0.00234857	958	2	0.629149	1	1096	2	0.00182482	134	0	1	1	1640	5	0.00304878	201	0	1	1	6954	15	0.00215703	880	0	1	1	1
AT1G06950.1	1674	614	0.366786	200	88	8.95784e-10	8.31359e-09	2741	12	0.00437796	305	3	0.718805	1	6808	18	0.00264395	804	0	1	1	1465	3	0.00204778	196	1	1	1	2182	3	0.00137489	292	0	1	1	5862	15	0.00255885	813	0	1	1	1
AT1G07110.1	1288	586	0.454969	141	80	2.22045e-16	3.68852e-15	1710	10	0.00584795	187	2	0.665755	1	6096	17	0.00278871	634	1	0.756653	1	1053	5	0.00474834	140	0	1	1	1354	6	0.00443131	181	0	1	1	4713	9	0.00190961	634	0	1	1	1
AT1G07120.1	505	156	0.308911	54	22	0.00561017	0.023543	1074	3	0.0027933	101	0	1	1	3537	11	0.00310998	358	1	0.549784	1	321	0	0	53	0	1	1	707	2	0.00282885	94	0	1	1	2303	0	0	329	0	1	1	1
AT1G07350.1	625	149	0.2384	91	39	7.85423e-05	0.000422097	677	3	0.00443131	95	0	1	1	2013	7	0.0034774	286	0	1	1	615	1	0.00162602	104	0	1	1	644	0	0	107	0	1	1	1868	4	0.00214133	302	0	1	1	1
AT1G07360.1	587	187	0.318569	75	30	0.00190787	0.00855866	966	0	0	129	0	1	1	3049	4	0.00131191	412	1	0.600843	1	522	2	0.00383142	88	0	1	1	806	3	0.00372208	138	1	0.595114	1	2267	4	0.00176445	388	0	1	1	1
AT1G07510.1	1276	547	0.428683	176	97	0	0	1528	12	0.0078534	200	5	0.0991835	1	5003	16	0.00319808	668	0	1	1	1236	4	0.00323625	166	0	1	1	1467	3	0.00204499	200	0	1	1	4556	6	0.00131694	624	0	1	1	1
AT1G07530.1	1099	322	0.292994	151	68	2.20807e-08	1.77263e-07	1556	4	0.00257069	195	2	0.687925	1	5189	15	0.00289073	632	0	1	1	1084	4	0.00369004	160	0	1	1	1357	3	0.00221076	197	0	1	1	4226	8	0.00189304	628	0	1	1	1
AT1G07590.1	927	190	0.204962	109	33	0.0920562	0.314104	742	8	0.0107817	83	2	0.268262	1	3542	5	0.00141163	410	0	1	1	802	10	0.0124688	102	2	0.997664	1	649	1	0.00154083	75	0	1	1	2937	4	0.00136193	399	0	1	1	1
AT1G07615.1	895	289	0.322905	126	59	3.27002e-08	2.57772e-07	982	4	0.00407332	122	1	0.775749	1	3144	6	0.0019084	440	0	1	1	825	3	0.00363636	114	0	1	1	745	1	0.00134228	113	0	1	1	2382	7	0.00293871	388	0	1	1	1
AT1G07670.1	442	162	0.366516	70	35	2.9872e-06	1.90005e-05	786	5	0.00636132	133	2	0.482671	1	2897	10	0.00345185	503	2	0.308336	1	433	0	0	73	0	1	1	735	2	0.00272109	131	0	1	1	2596	2	0.000770416	457	0	1	1	1
AT1G07705.1	742	473	0.637466	79	62	0	0	1438	5	0.00347705	157	0	1	1	4490	6	0.0013363	462	0	1	1	635	2	0.00314961	84	0	1	1	1176	4	0.00340136	161	0	1	1	3339	5	0.00149745	483	0	1	1	1
AT1G07970.1	775	332	0.428387	107	54	4.69101e-09	4.04539e-08	1391	5	0.00359454	181	1	0.891171	1	4343	15	0.00345383	574	1	0.721829	1	719	9	0.0125174	109	1	0.999864	1	1215	1	0.000823045	187	0	1	1	3710	3	0.000808625	599	0	1	1	1
AT1G07990.1	1138	601	0.52812	124	89	0	0	1988	8	0.00402414	204	1	0.9179	1	6793	15	0.00220816	712	1	0.79549	1	902	2	0.00221729	116	0	1	1	1497	3	0.00200401	190	0	1	1	5051	10	0.00197981	649	0	1	1	1
AT1G08030.1	923	251	0.271939	88	34	0.00199451	0.00891234	995	1	0.00100503	88	0	1	1	5022	10	0.00199124	469	0	1	1	604	1	0.00165563	83	1	0.998861	1	657	4	0.00608828	84	0	1	1	3236	9	0.00278121	452	1	0.456981	1	1
AT1G08040.1	456	170	0.372807	48	23	0.000322232	0.00160002	772	0	0	78	0	1	1	3489	6	0.00171969	373	0	1	1	331	1	0.00302115	46	0	1	1	545	1	0.00183486	77	0	1	1	2624	5	0.00190549	366	0	1	1	1
AT1G08060.1	2061	1249	0.606016	243	170	0	0	5569	36	0.00646436	613	11	0.133529	1	14826	40	0.00269796	1673	2	0.886354	1	1857	0	0	243	0	1	1	4699	13	0.00276655	620	1	0.982788	1	12304	18	0.00146294	1669	0	1	1	1
AT1G08190.1	1481	390	0.263336	185	64	0.00107862	0.00498307	2699	14	0.00518711	276	3	0.654403	1	7889	25	0.00316897	859	1	0.852632	1	1171	2	0.00170794	164	0	1	1	2016	0	0	259	0	1	1	5627	13	0.00231029	770	0	1	1	1
AT1G08260.1	3057	1346	0.440301	304	158	0	0	5431	14	0.00257779	510	1	0.998069	1	19393	60	0.0030939	1835	0	1	1	2317	8	0.00345274	296	2	1	1	3760	11	0.00292553	495	0	1	1	13534	25	0.0018472	1799	0	1	1	1
AT1G08350.1	694	280	0.403458	75	38	7.47748e-07	5.09443e-06	1055	4	0.00379147	108	0	1	1	4261	7	0.00164281	436	0	1	1	611	1	0.00163666	73	0	1	1	855	5	0.00584795	104	0	1	1	3313	4	0.00120736	408	0	1	1	1
AT1G08370.1	472	78	0.165254	49	18	0.0353809	0.130452	722	0	0	83	0	1	1	2471	4	0.00161878	289	0	1	1	379	2	0.00527704	50	0	1	1	633	0	0	91	0	1	1	2026	7	0.00345508	310	0	1	1	1
AT1G08410.1	750	232	0.309333	90	41	8.90465e-06	5.37944e-05	1317	4	0.00303721	155	2	0.564323	1	4126	16	0.00387785	481	1	0.657749	1	667	1	0.00149925	97	1	0.999637	1	1141	1	0.000876424	159	0	1	1	3699	8	0.00216275	506	0	1	1	1
AT1G08420.1	1419	708	0.498943	195	108	0	0	2362	8	0.00338696	317	1	0.979442	1	6655	13	0.00195342	895	1	0.863996	1	1270	4	0.00314961	200	1	1	1	2116	2	0.00094518	322	1	0.878724	1	5974	8	0.00133914	886	0	1	1	1
AT1G08450.1	723	346	0.478562	75	46	1.09106e-11	1.2026e-10	1211	4	0.00330306	115	1	0.755664	1	3936	8	0.00203252	376	1	0.567491	1	613	0	0	75	0	1	1	936	2	0.00213675	114	0	1	1	3130	4	0.00127796	365	0	1	1	1
AT1G08490.1	788	189	0.239848	94	32	0.0214693	0.0824728	1070	3	0.00280374	112	1	0.746514	1	4293	10	0.00232937	429	1	0.615686	1	572	33	0.0576923	94	4	0.942845	1	755	3	0.00397351	113	0	1	1	3077	2	0.000649984	431	0	1	1	1
AT1G08550.1	570	308	0.540351	68	48	1.11022e-15	1.76018e-14	1093	3	0.00274474	123	2	0.442541	1	3516	8	0.00227531	419	1	0.607023	1	472	3	0.00635593	64	0	1	1	865	1	0.00115607	115	0	1	1	2538	5	0.00197006	379	0	1	1	1
AT1G08590.1	1391	336	0.241553	210	61	0.0661287	0.233009	1589	3	0.00188798	216	1	0.929127	1	6348	17	0.00267801	901	1	0.865803	1	1178	2	0.00169779	196	1	1	1	1277	5	0.00391543	206	0	1	1	4757	10	0.00210217	851	0	1	1	1
AT1G08600.1	1614	869	0.538414	177	120	0	0	3366	20	0.00594177	345	3	0.791784	1	12047	43	0.00356935	1320	3	0.563284	1	1293	3	0.00232019	175	0	1	1	2437	6	0.00246204	335	1	0.888626	1	8995	24	0.00266815	1296	0	1	1	1
AT1G08610.1	657	227	0.34551	75	34	5.67086e-05	0.000309719	1242	3	0.00241546	143	1	0.826629	1	3905	5	0.00128041	479	0	1	1	511	2	0.00391389	75	0	1	1	908	2	0.00220264	139	0	1	1	3080	5	0.00162338	473	0	1	1	1
AT1G08620.1	1520	701	0.461184	194	115	0	0	2780	8	0.0028777	322	1	0.980664	1	8503	21	0.00246972	1032	0	1	1	1420	3	0.00211268	188	0	1	1	2531	3	0.0011853	318	0	1	1	7325	15	0.00204778	987	0	1	1	1
AT1G08640.1	532	179	0.336466	56	24	0.00175384	0.00791503	543	1	0.00184162	58	1	0.508715	1	2620	9	0.00343511	274	1	0.457073	1	364	0	0	51	0	1	1	399	0	0	56	0	1	1	2071	8	0.00386287	258	0	1	1	1
AT1G08680.1	1094	706	0.645338	115	91	0	0	1906	5	0.00262329	203	2	0.708869	1	5326	10	0.00187758	569	0	1	1	789	1	0.00126743	108	0	1	1	1450	7	0.00482759	192	1	0.715764	1	3833	12	0.00313071	544	0	1	1	1
AT1G08720.1	1421	565	0.397607	168	74	1.74045e-08	1.41129e-07	2288	10	0.00437063	254	3	0.598887	1	7089	18	0.00253915	819	1	0.838888	1	1122	0	0	163	0	1	1	1653	3	0.00181488	254	0	1	1	5373	7	0.00130281	817	0	1	1	1
AT1G08750.1	637	205	0.321821	58	22	0.0145275	0.0572265	1188	6	0.00505051	105	0	1	1	3676	8	0.00217628	324	0	1	1	471	1	0.00212314	58	0	1	1	864	1	0.00115741	106	0	1	1	2527	9	0.00356154	328	0	1	1	1
AT1G08760.1	1046	265	0.253346	142	48	0.00685274	0.02839	1455	6	0.00412371	196	2	0.690609	1	4987	12	0.00240626	668	0	1	1	1014	2	0.00197239	137	0	1	1	1373	3	0.002185	194	0	1	1	4467	13	0.00291023	630	0	1	1	1
AT1G08840.1	1536	759	0.494141	157	103	0	0	3436	10	0.00291036	330	0	1	1	12391	35	0.00282463	1199	1	0.930936	1	1326	1	0.000754148	159	0	1	1	2541	16	0.00629673	329	3	0.363578	1	9385	25	0.00266383	1200	0	1	1	1
AT1G08910.1	979	322	0.328907	112	49	5.17542e-06	3.20813e-05	1658	5	0.00301568	188	4	0.197673	1	5773	20	0.0034644	652	0	1	1	880	2	0.00227273	119	0	1	1	1371	3	0.00218818	196	0	1	1	4485	12	0.00267559	669	0	1	1	1
AT1G08970.1	137	48	0.350365	27	12	0.017382	0.0676546	441	0	0	70	0	1	1	914	2	0.00218818	140	0	1	1	128	5	0.0390625	29	3	0.399953	1	325	0	0	73	0	1	1	627	1	0.0015949	130	0	1	1	1
AT1G09010.1	1478	382	0.258457	165	60	0.000362772	0.0017869	2328	9	0.00386598	270	1	0.963432	1	7002	11	0.00157098	792	0	1	1	1078	6	0.00556586	160	2	0.999969	1	1764	5	0.00283447	257	1	0.814336	1	5269	9	0.0017081	749	0	1	1	1
AT1G09020.1	791	378	0.477876	97	55	9.65661e-12	1.06757e-10	1185	3	0.00253165	139	1	0.817919	1	3916	12	0.00306435	440	1	0.624995	1	651	1	0.0015361	96	0	1	1	971	2	0.00205973	136	0	1	1	3001	7	0.00233256	426	0	1	1	1
AT1G09060.1	1332	547	0.410661	156	80	3.65707e-13	4.64426e-12	2199	7	0.00318327	242	2	0.794694	1	7095	16	0.00225511	768	0	1	1	1170	1	0.000854701	162	0	1	1	1681	4	0.00237954	240	0	1	1	5620	9	0.00160142	777	0	1	1	1
AT1G09160.1	613	172	0.280587	64	32	7.82016e-06	4.75541e-05	1140	4	0.00350877	100	1	0.70636	1	4101	9	0.00219459	412	0	1	1	460	0	0	60	0	1	1	747	2	0.00267738	96	0	1	1	3105	6	0.00193237	385	0	1	1	1
AT1G09230.1	867	220	0.253749	84	26	0.100134	0.338894	1209	1	0.00082713	110	0	1	1	4420	13	0.00294118	410	0	1	1	576	2	0.00347222	81	1	0.998659	1	763	1	0.00131062	106	0	1	1	2839	7	0.00246566	402	0	1	1	1
AT1G09270.1	841	318	0.378121	91	43	1.65615e-06	1.09056e-05	1292	3	0.00232198	144	0	1	1	4022	9	0.00223769	468	1	0.647686	1	636	0	0	96	0	1	1	1037	1	0.00096432	143	0	1	1	3476	8	0.0023015	479	0	1	1	1
AT1G09280.1	812	357	0.439655	100	55	4.88005e-11	5.08464e-10	1277	2	0.00156617	156	0	1	1	4192	9	0.00214695	499	0	1	1	708	1	0.00141243	98	0	1	1	1116	0	0	153	0	1	1	3244	10	0.00308261	452	0	1	1	1
AT1G09290.1	376	97	0.257979	40	15	0.0436025	0.158465	889	4	0.00449944	91	2	0.304251	1	2808	6	0.00213675	301	1	0.488786	1	282	0	0	43	0	1	1	632	0	0	91	0	1	1	2149	4	0.00186133	296	1	0.329593	1	1
AT1G09300.1	966	363	0.375776	89	41	6.33207e-06	3.89693e-05	1620	2	0.00123457	146	0	1	1	4663	15	0.00321681	428	1	0.614829	1	668	2	0.00299401	84	0	1	1	1159	8	0.0069025	144	0	1	1	3484	11	0.00315729	421	1	0.433758	1	1
AT1G09430.1	518	156	0.301158	62	27	0.000692987	0.00328174	854	6	0.00702576	95	3	0.110236	1	3819	9	0.00235664	411	0	1	1	445	0	0	58	0	1	1	658	2	0.00303951	88	1	0.438172	1	2955	5	0.00169205	380	0	1	1	1
AT1G09570.1	1210	376	0.310744	167	73	3.18136e-08	2.50865e-07	2367	4	0.0016899	317	1	0.979442	1	7036	24	0.00341103	1028	2	0.666933	1	998	20	0.0200401	145	3	0.999359	1	1900	13	0.00684211	273	0	1	1	5355	28	0.00522876	843	0	1	1	1
AT1G09730.1	1532	730	0.476501	155	86	1.11022e-16	1.90152e-15	2287	9	0.00393529	223	1	0.934953	1	8203	25	0.00304767	822	0	1	1	1253	25	0.0199521	154	3	0.999656	1	1826	3	0.00164294	223	0	1	1	6339	10	0.00157754	817	0	1	1	1
AT1G09810.1	616	262	0.425325	74	39	1.39932e-07	1.02951e-06	926	3	0.00323974	95	0	1	1	3771	15	0.00397772	415	1	0.603503	1	627	12	0.0191388	75	2	0.983843	1	773	0	0	93	0	1	1	3243	11	0.00339192	414	0	1	1	1
AT1G09830.1	776	208	0.268041	100	39	0.000792861	0.0037337	834	1	0.00119904	117	1	0.761579	1	3145	15	0.00476948	460	0	1	1	703	2	0.00284495	93	0	1	1	683	1	0.00146413	103	0	1	1	2237	6	0.00268216	387	0	1	1	1
AT1G09910.1	944	474	0.502119	109	68	0	0	1602	2	0.00124844	169	1	0.873931	1	6287	25	0.00397646	644	1	0.762018	1	739	0	0	109	0	1	1	1199	3	0.00250209	168	0	1	1	4440	9	0.00202703	630	0	1	1	1
AT1G09940.1	640	129	0.201563	98	25	0.428706	1	1062	2	0.00188324	150	0	1	1	2884	5	0.0017337	442	1	0.626663	1	625	2	0.0032	103	1	0.999778	1	914	0	0	148	0	1	1	2542	1	0.000393391	443	0	1	1	1
AT1G09980.1	1102	481	0.436479	129	70	2.98095e-13	3.81795e-12	1864	7	0.00375536	189	1	0.901333	1	6611	12	0.00181516	695	1	0.787591	1	1020	3	0.00294118	133	0	1	1	1431	4	0.00279525	185	0	1	1	5032	8	0.00158983	672	0	1	1	1
AT1G10050.1	1819	581	0.319406	207	84	1.77645e-07	1.29309e-06	2620	15	0.00572519	292	2	0.871532	1	7972	18	0.0022579	920	0	1	1	1506	2	0.00132802	207	0	1	1	2104	2	0.00095057	291	0	1	1	6499	7	0.00107709	902	0	1	1	1
AT1G10130.1	1328	601	0.45256	130	74	2.10942e-15	3.26033e-14	3409	8	0.00234673	317	0	1	1	9419	23	0.00244187	891	1	0.862778	1	1008	4	0.00396825	133	0	1	1	2559	9	0.003517	315	0	1	1	7190	19	0.00264256	880	0	1	1	1
AT1G10180.1	1248	559	0.447917	140	76	2.86438e-14	4.02885e-13	1893	4	0.00211305	204	1	0.9179	1	5992	22	0.00367156	650	1	0.765179	1	962	3	0.0031185	134	1	0.999982	1	1466	3	0.00204638	197	0	1	1	4464	9	0.00201613	627	0	1	1	1
AT1G10290.1	1098	594	0.540984	141	83	0	0	2223	8	0.00359874	263	3	0.622287	1	7374	19	0.00257662	839	0	1	1	924	4	0.004329	127	0	1	1	1817	2	0.00110072	244	0	1	1	5900	15	0.00254237	793	0	1	1	1
AT1G10410.1	1143	282	0.246719	111	32	0.158479	0.513231	1227	0	0	110	0	1	1	4282	6	0.00140121	402	0	1	1	795	4	0.00503145	111	0	1	1	875	4	0.00457143	109	0	1	1	3167	5	0.00157878	399	0	1	1	1
AT1G10450.1	1478	621	0.420162	150	76	3.05578e-12	3.5586e-11	2961	20	0.00675447	285	4	0.457739	1	9183	16	0.00174235	925	0	1	1	1189	21	0.0176619	150	2	0.999934	1	2239	6	0.00267977	282	0	1	1	6524	10	0.0015328	901	0	1	1	1
AT1G10490.1	1412	713	0.504958	141	88	0	0	2659	12	0.00451297	254	3	0.598887	1	9600	26	0.00270833	919	1	0.871081	1	1199	1	0.000834028	141	0	1	1	2038	7	0.00343474	250	0	1	1	7869	13	0.00165205	915	0	1	1	1
AT1G10510.1	897	227	0.253066	92	28	0.107628	0.361265	1590	4	0.00251572	143	0	1	1	5925	18	0.00303797	564	0	1	1	651	2	0.0030722	94	0	1	1	1102	4	0.00362976	143	0	1	1	4201	15	0.00357058	566	0	1	1	1
AT1G10520.1	1124	284	0.252669	121	43	0.00371833	0.0159726	1355	2	0.00147601	136	0	1	1	4752	8	0.0016835	470	0	1	1	920	0	0	119	0	1	1	1069	1	0.000935454	135	0	1	1	3558	5	0.00140528	462	0	1	1	1
AT1G10660.1	531	193	0.363465	54	24	0.000948768	0.00440053	687	3	0.00436681	70	2	0.209873	1	2886	8	0.002772	301	0	1	1	445	17	0.0382022	52	3	0.784885	1	560	1	0.00178571	67	0	1	1	2431	8	0.00329083	296	0	1	1	1
AT1G10760.1	1966	608	0.309257	208	82	1.00872e-06	6.79718e-06	3876	15	0.00386997	396	2	0.954069	1	11837	54	0.00456197	1234	1	0.93612	1	1616	4	0.00247525	209	2	0.999999	1	2896	6	0.00207182	391	0	1	1	9236	15	0.00162408	1214	0	1	1	1
AT1G10780.1	574	186	0.324042	69	33	1.87793e-05	0.000108648	767	0	0	83	0	1	1	2972	2	0.000672948	377	0	1	1	470	0	0	74	0	1	1	609	1	0.00164204	88	0	1	1	2677	9	0.00336197	400	0	1	1	1
AT1G10820.1	441	208	0.471655	39	23	4.11749e-06	2.57261e-05	739	2	0.00270636	65	0	1	1	2208	3	0.0013587	206	0	1	1	372	0	0	40	0	1	1	556	0	0	65	0	1	1	1719	2	0.00116347	207	0	1	1	1
AT1G10870.1	1037	607	0.585342	117	83	0	0	1650	6	0.00363636	176	1	0.884294	1	6632	20	0.00301568	659	0	1	1	905	4	0.00441989	122	0	1	1	1297	5	0.00385505	182	0	1	1	4978	11	0.00220972	668	0	1	1	1
AT1G10890.1	514	208	0.404669	56	28	2.83947e-05	0.00016117	421	4	0.00950119	45	1	0.423875	1	1472	5	0.00339674	190	1	0.345271	1	467	1	0.00214133	58	0	1	1	362	0	0	45	0	1	1	1351	4	0.00296077	190	0	1	1	1
AT1G10900.1	778	276	0.354756	86	37	0.000107275	0.000565556	1476	3	0.00203252	163	1	0.864313	1	5847	19	0.00324953	665	0	1	1	644	3	0.00465839	84	0	1	1	1252	5	0.00399361	160	0	1	1	4615	15	0.00325027	631	1	0.57362	1	1
AT1G10910.1	1039	409	0.393648	109	48	5.16027e-06	3.19998e-05	1438	2	0.00139082	139	0	1	1	5430	17	0.00313076	552	1	0.707847	1	801	2	0.00249688	97	0	1	1	1115	5	0.0044843	135	0	1	1	4192	10	0.0023855	513	1	0.499935	1	1
AT1G10930.1	1710	707	0.41345	183	103	0	0	2725	13	0.00477064	291	1	0.971729	1	9709	34	0.00350191	1059	2	0.682644	1	1398	3	0.00214592	183	0	1	1	2337	6	0.00256739	288	0	1	1	8136	26	0.00319567	1046	0	1	1	1
AT1G10950.1	900	362	0.402222	96	45	1.26924e-06	8.4647e-06	1244	3	0.00241158	129	0	1	1	4851	12	0.00247372	533	0	1	1	649	0	0	90	0	1	1	870	0	0	122	0	1	1	3718	8	0.00215169	507	0	1	1	1
AT1G10970.1	353	118	0.334278	53	25	0.000245205	0.00123441	758	1	0.00131926	117	0	1	1	2153	5	0.00232234	322	1	0.512166	1	290	1	0.00344828	57	0	1	1	595	1	0.00168067	118	0	1	1	1404	5	0.00356125	287	1	0.321392	1	1
AT1G11060.1	1559	493	0.316228	164	66	4.78387e-06	2.98043e-05	2240	4	0.00178571	224	0	1	1	7448	16	0.00214823	789	0	1	1	1291	5	0.00387297	164	0	1	1	1887	5	0.00264971	225	1	0.771029	1	6136	15	0.00244459	786	0	1	1	1
AT1G11200.1	379	106	0.279683	42	18	0.0063153	0.0262997	645	12	0.0186047	66	3	0.0469113	1	2563	5	0.00195084	267	0	1	1	296	17	0.0574324	42	2	0.851823	1	448	2	0.00446429	66	1	0.351063	1	1882	6	0.0031881	267	0	1	1	1
AT1G11310.1	880	231	0.2625	87	32	0.00634943	0.0264304	1240	2	0.0016129	117	0	1	1	5427	24	0.00442233	524	1	0.689031	1	674	2	0.00296736	86	1	0.999108	1	875	2	0.00228571	115	0	1	1	3767	14	0.00371649	508	0	1	1	1
AT1G11390.1	844	379	0.449052	99	54	1.11099e-10	1.12271e-09	1050	6	0.00571429	124	1	0.781178	1	4332	5	0.0011542	540	0	1	1	609	0	0	99	0	1	1	749	1	0.00133511	125	0	1	1	3376	6	0.00177725	568	1	0.535743	1	1
AT1G11400.1	312	131	0.419872	38	20	0.000157711	0.000813313	593	2	0.00337268	69	1	0.570668	1	1545	4	0.002589	182	0	1	1	326	0	0	38	0	1	1	546	3	0.00549451	69	0	1	1	1372	3	0.00218659	182	0	1	1	1
AT1G11410.1	1095	391	0.357078	149	86	0	0	1611	6	0.00372439	194	2	0.685221	1	6004	12	0.00199867	722	1	0.799998	1	1035	5	0.00483092	141	1	0.99999	1	1346	1	0.000742942	178	0	1	1	4897	9	0.00183786	679	0	1	1	1
AT1G11650.1	651	63	0.0967742	75	12	0.969856	1	965	6	0.00621762	110	0	1	1	1728	3	0.00173611	214	1	0.379378	1	555	1	0.0018018	79	0	1	1	820	3	0.00365854	111	0	1	1	1617	1	0.000618429	236	0	1	1	1
AT1G11660.1	1149	549	0.477807	133	78	0	0	1783	7	0.00392597	201	1	0.914826	1	5507	6	0.00108952	662	0	1	1	1008	3	0.00297619	129	0	1	1	1480	4	0.0027027	192	0	1	1	4520	12	0.00265487	618	1	0.566066	1	1
AT1G11680.1	532	125	0.234962	75	30	0.00190787	0.00855866	892	1	0.00112108	103	0	1	1	3215	5	0.00155521	398	0	1	1	578	2	0.00346021	85	1	0.999033	1	838	1	0.00119332	116	0	1	1	3162	5	0.00158128	405	0	1	1	1
AT1G11720.1	1384	907	0.655347	165	130	0	0	2128	5	0.00234962	228	0	1	1	7279	25	0.00343454	860	1	0.85296	1	1241	2	0.0016116	154	0	1	1	1868	5	0.00267666	225	0	1	1	6264	15	0.00239464	795	0	1	1	1
AT1G11790.1	804	418	0.5199	86	46	5.93737e-09	5.07553e-08	1029	4	0.00388727	116	2	0.413444	1	2757	12	0.00435256	322	0	1	1	584	1	0.00171233	77	0	1	1	844	3	0.0035545	109	0	1	1	2262	9	0.00397878	304	0	1	1	1
AT1G11860.1	355	72	0.202817	48	20	0.00601047	0.0251153	767	1	0.00130378	92	0	1	1	3065	5	0.00163132	405	0	1	1	331	1	0.00302115	47	0	1	1	614	1	0.00162866	91	0	1	1	2305	2	0.000867679	343	0	1	1	1
AT1G11870.1	823	293	0.356015	94	47	6.54787e-08	4.97686e-07	1166	6	0.0051458	128	1	0.791645	1	3737	12	0.00321113	411	2	0.233031	1	785	2	0.00254777	104	1	0.999795	1	910	3	0.0032967	133	0	1	1	2944	6	0.00203804	425	0	1	1	1
AT1G11910.1	683	230	0.33675	73	32	0.000200652	0.00102126	1401	1	0.000713776	153	0	1	1	4263	9	0.00211119	475	0	1	1	493	1	0.0020284	71	0	1	1	1058	2	0.00189036	152	0	1	1	3429	6	0.00174978	472	0	1	1	1
AT1G11950.1	1175	484	0.411915	116	64	1.10911e-12	1.34685e-11	2000	4	0.002	192	0	1	1	7912	21	0.0026542	780	0	1	1	895	15	0.0167598	110	2	0.998699	1	1383	6	0.00433839	185	0	1	1	5122	10	0.00195236	718	0	1	1	1
AT1G11960.1	1557	412	0.264611	165	59	0.000658415	0.00313099	1656	9	0.00543478	170	4	0.154743	1	5538	16	0.00288913	595	0	1	1	1300	6	0.00461538	180	0	1	1	1251	1	0.000799361	180	0	1	1	4310	9	0.00208817	642	0	1	1	1
AT1G12000.1	882	284	0.321995	92	35	0.00234997	0.0103961	1687	8	0.00474215	168	2	0.608026	1	4547	18	0.00395865	482	1	0.658511	1	683	2	0.00292826	96	0	1	1	1293	5	0.00386698	178	0	1	1	3596	6	0.00166852	505	0	1	1	1
AT1G12120.1	673	384	0.570579	84	61	0	0	905	2	0.00220994	111	1	0.743389	1	3242	6	0.00185071	403	0	1	1	579	4	0.00690846	79	1	0.998421	1	668	1	0.00149701	104	0	1	1	2436	5	0.00205255	369	0	1	1	1
AT1G12230.1	960	320	0.333333	107	35	0.0306767	0.114524	1254	2	0.0015949	130	0	1	1	3386	8	0.00236267	332	1	0.52292	1	815	2	0.00245399	95	0	1	1	973	2	0.0020555	112	1	0.519921	1	2575	4	0.0015534	294	0	1	1	1
AT1G12360.1	1197	325	0.271512	117	48	4.93912e-05	0.000272015	1612	6	0.00372208	148	0	1	1	6192	15	0.00242248	586	2	0.375002	1	984	3	0.00304878	126	0	1	1	1224	2	0.00163399	152	0	1	1	4665	8	0.0017149	598	0	1	1	1
AT1G12470.1	1545	733	0.474434	168	98	0	0	2390	10	0.0041841	250	3	0.588186	1	8169	17	0.00208104	860	0	1	1	1247	1	0.000801925	167	0	1	1	1950	3	0.00153846	250	0	1	1	6616	13	0.00196493	861	2	0.323764	1	1
AT1G12480.1	604	131	0.216887	71	24	0.0456238	0.16521	1146	4	0.0034904	118	1	0.764483	1	4110	14	0.00340633	470	2	0.281369	1	492	1	0.00203252	76	0	1	1	770	1	0.0012987	107	0	1	1	3101	9	0.00290229	455	0	1	1	1
AT1G12530.1	278	94	0.338129	43	16	0.0406893	0.148519	309	0	0	39	0	1	1	1188	0	0	155	0	1	1	343	1	0.00291545	44	0	1	1	314	0	0	41	0	1	1	1123	4	0.00356189	155	0	1	1	1
AT1G12580.1	510	265	0.519608	75	49	6.90559e-14	9.36704e-13	946	2	0.00211416	131	1	0.799165	1	2766	10	0.00361533	398	1	0.58819	1	506	0	0	82	0	1	1	970	3	0.00309278	151	0	1	1	2923	4	0.00136846	447	0	1	1	1
AT1G12680.1	508	123	0.242126	67	25	0.0120679	0.0481622	1055	2	0.00189573	137	1	0.813402	1	2928	7	0.00239071	409	2	0.231398	1	428	1	0.00233645	64	0	1	1	848	2	0.00235849	132	0	1	1	2558	5	0.00195465	397	0	1	1	1
AT1G12770.1	563	326	0.579041	96	70	0	0	869	4	0.00460299	140	3	0.243639	1	2716	12	0.00441826	468	1	0.647686	1	570	0	0	94	0	1	1	843	3	0.00355872	138	0	1	1	2347	5	0.00213038	403	0	1	1	1
AT1G12800.1	1296	354	0.273148	127	44	0.00572087	0.0239824	1847	7	0.00378993	179	1	0.88847	1	7095	29	0.00408739	682	2	0.448563	1	1019	4	0.00392542	126	0	1	1	1519	4	0.00263331	178	0	1	1	5644	4	0.000708717	665	0	1	1	1
AT1G12820.1	840	182	0.216667	108	42	0.000547685	0.00262551	1041	0	0	125	0	1	1	4138	6	0.00144998	496	0	1	1	588	3	0.00510204	110	1	0.999874	1	715	2	0.0027972	121	0	1	1	2869	4	0.00139421	481	0	1	1	1
AT1G12840.1	760	213	0.280263	74	28	0.00662145	0.0274745	997	2	0.00200602	97	0	1	1	3297	8	0.00242645	332	0	1	1	677	5	0.00738552	74	0	1	1	807	1	0.00123916	97	0	1	1	2629	2	0.000760746	326	0	1	1	1
AT1G12990.1	691	198	0.286541	82	30	0.00876082	0.0357044	852	3	0.00352113	93	0	1	1	3004	12	0.00399467	337	0	1	1	589	16	0.0271647	78	2	0.986916	1	688	2	0.00290698	89	0	1	1	2161	3	0.00138825	318	0	1	1	1
AT1G13000.1	917	426	0.464558	90	51	5.55347e-11	5.76876e-10	858	4	0.004662	84	1	0.642756	1	3719	13	0.00349556	374	0	1	1	670	1	0.00149254	86	0	1	1	604	1	0.00165563	84	0	1	1	2610	3	0.00114943	366	0	1	1	1
AT1G13040.1	832	354	0.425481	100	49	7.87346e-08	5.91693e-07	986	1	0.0010142	114	0	1	1	3625	4	0.00110345	437	0	1	1	693	2	0.002886	91	0	1	1	770	2	0.0025974	104	0	1	1	2607	6	0.0023015	366	0	1	1	1
AT1G13050.1	365	189	0.517808	56	38	7.51788e-12	8.47324e-11	519	1	0.00192678	81	1	0.629378	1	1605	4	0.00249221	251	0	1	1	343	3	0.00874636	57	0	1	1	474	1	0.0021097	83	0	1	1	1533	2	0.00130463	296	0	1	1	1
AT1G13060.1	515	203	0.394175	58	31	1.75659e-06	1.15196e-05	766	0	0	76	0	1	1	2353	7	0.00297493	251	0	1	1	447	0	0	60	0	1	1	551	1	0.00181488	76	0	1	1	2094	2	0.00095511	255	0	1	1	1
AT1G13195.1	449	92	0.2049	42	16	0.0327402	0.121575	484	2	0.00413223	50	1	0.458114	1	2420	4	0.00165289	238	0	1	1	327	1	0.0030581	41	0	1	1	345	0	0	48	0	1	1	1711	5	0.00292227	237	0	1	1	1
AT1G13210.1	2706	594	0.219512	278	91	0.00092873	0.00431886	2487	4	0.00160836	262	1	0.959665	1	8830	17	0.00192525	961	0	1	1	2050	26	0.0126829	259	3	1	1	1755	3	0.0017094	238	0	1	1	5856	14	0.00239071	859	0	1	1	1
AT1G13410.1	786	217	0.276081	78	27	0.0264094	0.0997178	656	3	0.00457317	68	0	1	1	3308	10	0.00302297	378	0	1	1	583	0	0	74	0	1	1	477	1	0.00209644	61	0	1	1	2294	4	0.00174368	343	0	1	1	1
AT1G13460.1	800	274	0.3425	74	40	3.85672e-08	3.01347e-07	1076	5	0.00464684	100	2	0.344319	1	4150	20	0.00481928	413	1	0.601732	1	583	23	0.0394511	70	4	0.80851	1	866	4	0.00461894	97	0	1	1	3459	13	0.00375831	409	0	1	1	1
AT1G13560.1	622	325	0.522508	56	35	1.50732e-09	1.37264e-08	656	0	0	63	0	1	1	4699	23	0.00489466	409	2	0.231398	1	451	26	0.0576497	54	4	0.620187	1	501	1	0.00199601	61	0	1	1	3193	5	0.00156593	391	0	1	1	1
AT1G13630.1	1135	344	0.303084	110	44	0.000197547	0.00100867	1834	4	0.00218103	176	1	0.884294	1	6860	14	0.00204082	685	0	1	1	768	2	0.00260417	103	0	1	1	1215	4	0.00329218	165	0	1	1	4463	3	0.000672194	624	0	1	1	1
AT1G13730.1	734	307	0.418256	83	51	7.60725e-13	9.35142e-12	1005	10	0.00995025	103	2	0.357517	1	3699	11	0.00297378	377	0	1	1	653	41	0.0627871	86	6	0.675128	1	867	1	0.0011534	107	0	1	1	3019	8	0.00264988	383	0	1	1	1
AT1G13880.1	587	181	0.308348	68	32	3.74855e-05	0.000209109	908	4	0.00440529	108	1	0.73378	1	2689	3	0.00111566	327	0	1	1	514	1	0.00194553	72	0	1	1	767	3	0.00391134	113	0	1	1	2410	3	0.00124481	363	0	1	1	1
AT1G13980.1	1466	896	0.611187	194	147	0	0	3096	5	0.00161499	382	0	1	1	10130	15	0.00148075	1262	0	1	1	1220	0	0	184	0	1	1	2498	8	0.00320256	375	0	1	1	7758	20	0.00257798	1216	0	1	1	1
AT1G14180.1	351	129	0.367521	49	26	1.40452e-05	8.23408e-05	605	3	0.00495868	89	2	0.295275	1	2282	7	0.00306748	299	0	1	1	334	1	0.00299401	50	0	1	1	571	3	0.00525394	89	0	1	1	1964	6	0.00305499	292	0	1	1	1
AT1G14205.1	357	97	0.271709	36	14	0.0370899	0.136199	426	0	0	39	0	1	1	1350	1	0.000740741	135	0	1	1	295	0	0	38	0	1	1	372	0	0	40	0	1	1	1137	1	0.000879507	138	0	1	1	1
AT1G14310.1	567	216	0.380952	50	25	7.51298e-05	0.000404755	781	5	0.00640205	69	0	1	1	2585	7	0.00270793	227	0	1	1	393	0	0	50	0	1	1	573	7	0.0122164	69	1	0.363694	1	1831	3	0.00163845	230	0	1	1	1
AT1G14470.1	946	227	0.239958	108	36	0.021578	0.0828174	1026	1	0.000974659	113	1	0.749602	1	3809	13	0.00341297	449	0	1	1	738	3	0.00406504	98	0	1	1	818	4	0.00488998	109	0	1	1	2765	3	0.00108499	427	0	1	1	1
AT1G14560.1	581	141	0.242685	68	30	0.00027314	0.00136417	716	1	0.00139665	81	1	0.629378	1	2674	5	0.00186986	310	0	1	1	485	0	0	68	0	1	1	591	1	0.00169205	81	0	1	1	2157	3	0.00139082	310	0	1	1	1
AT1G14660.1	1286	322	0.250389	139	50	0.00139258	0.00636006	1697	5	0.00294638	175	1	0.882868	1	6365	15	0.00235664	667	1	0.773911	1	1003	2	0.00199402	133	0	1	1	1295	1	0.000772201	170	0	1	1	4961	11	0.00221729	650	0	1	1	1
AT1G14670.1	954	427	0.447589	118	66	2.08722e-13	2.72269e-12	1082	3	0.00277264	124	0	1	1	3992	14	0.00350701	459	0	1	1	1026	3	0.00292398	128	0	1	1	1045	4	0.00382775	134	0	1	1	3611	8	0.00221545	490	1	0.484154	1	1
AT1G14690.1	851	325	0.381904	96	46	4.42557e-07	3.10503e-06	1576	3	0.00190355	153	1	0.846624	1	4897	9	0.00183786	520	0	1	1	764	0	0	94	0	1	1	1196	2	0.00167224	150	1	0.625728	1	4077	8	0.00196223	509	0	1	1	1
AT1G14710.1	1024	190	0.185547	128	41	0.029149	0.109126	1141	1	0.000876424	142	0	1	1	3649	7	0.00191833	452	0	1	1	890	3	0.00337079	127	1	0.999969	1	957	0	0	147	0	1	1	2798	11	0.00393138	434	0	1	1	1
AT1G14830.1	1066	468	0.439024	116	59	6.31069e-10	5.92906e-09	1760	1	0.000568182	178	0	1	1	5286	13	0.00245933	536	0	1	1	807	9	0.0111524	113	2	0.998956	1	1346	9	0.00668648	177	1	0.686411	1	3933	19	0.00483092	531	0	1	1	1
AT1G14840.1	960	321	0.334375	104	42	0.000213021	0.00107827	1504	5	0.00332447	160	1	0.859232	1	4723	7	0.00148211	532	0	1	1	800	17	0.02125	106	2	0.998255	1	1231	2	0.0016247	159	0	1	1	3960	5	0.00126263	538	0	1	1	1
AT1G14850.1	1666	730	0.438175	222	125	0	0	3439	13	0.00378017	431	7	0.274388	1	10386	23	0.00221452	1311	0	1	1	1515	9	0.00594059	221	2	1	1	2765	9	0.00325497	409	0	1	1	8287	12	0.00144805	1261	0	1	1	1
AT1G15020.1	1051	340	0.323501	116	49	1.65409e-05	9.63719e-05	1434	4	0.0027894	146	0	1	1	3979	9	0.00226187	429	0	1	1	781	22	0.028169	112	2	0.998877	1	908	2	0.00220264	134	0	1	1	2706	3	0.00110865	399	0	1	1	1
AT1G15060.1	1050	350	0.333333	119	53	1.12575e-06	7.56133e-06	1355	3	0.00221402	166	1	0.86921	1	3959	15	0.00378884	464	0	1	1	760	1	0.00131579	107	0	1	1	1078	3	0.00278293	155	0	1	1	3112	3	0.00096401	445	0	1	1	1
AT1G15215.1	293	80	0.273038	24	8	0.209426	0.655521	561	5	0.00891266	46	1	0.430891	1	1747	7	0.00400687	145	0	1	1	186	1	0.00537634	24	0	1	1	386	0	0	46	0	1	1	1100	2	0.00181818	145	0	1	1	1
AT1G15240.1	1066	517	0.484991	121	73	0	0	1630	17	0.0104294	185	4	0.190276	1	5276	20	0.00379075	594	0	1	1	846	0	0	121	0	1	1	1339	3	0.00224048	183	0	1	1	3998	8	0.002001	591	0	1	1	1
AT1G15280.1	568	276	0.485915	80	46	2.44374e-10	2.38176e-09	1486	8	0.00538358	176	2	0.633216	1	3827	9	0.00235171	514	0	1	1	606	2	0.00330033	81	0	1	1	1290	9	0.00697674	175	1	0.682275	1	3604	6	0.00166482	519	0	1	1	1
AT1G15430.1	272	131	0.481618	54	33	9.98665e-09	8.33802e-08	272	2	0.00735294	52	2	0.132226	1	1151	5	0.00434405	219	0	1	1	383	16	0.0417755	60	4	0.702005	1	366	1	0.00273224	59	0	1	1	1592	2	0.00125628	255	0	1	1	1
AT1G15440.1	1284	463	0.360592	174	78	2.78221e-09	2.45128e-08	1923	8	0.00416017	262	2	0.829373	1	5395	21	0.00389249	764	1	0.817873	1	1060	22	0.0207547	167	5	0.997342	1	1595	1	0.000626959	248	0	1	1	4643	12	0.00258454	741	0	1	1	1
AT1G15480.1	820	240	0.292683	99	37	0.00257834	0.0113385	1151	3	0.00260643	135	0	1	1	4441	10	0.00225175	556	0	1	1	633	0	0	98	0	1	1	869	1	0.00115075	128	0	1	1	3418	6	0.00175541	506	0	1	1	1
AT1G15510.1	1027	222	0.216164	120	37	0.0620168	0.219358	1492	3	0.00201072	181	2	0.648305	1	5922	13	0.0021952	761	0	1	1	856	1	0.00116822	116	0	1	1	1318	5	0.00379363	173	1	0.678084	1	4885	15	0.00307062	717	2	0.252444	1	1
AT1G15660.1	1127	377	0.334516	122	55	4.42615e-07	3.10503e-06	1612	8	0.00496278	175	4	0.1663	1	5610	13	0.00231729	623	0	1	1	918	3	0.00326797	122	0	1	1	1270	3	0.0023622	172	0	1	1	4331	10	0.00230894	613	0	1	1	1
AT1G15750.1	1589	848	0.533669	206	127	0	0	2375	7	0.00294737	289	5	0.277736	1	8697	18	0.00206968	1045	0	1	1	1428	2	0.00140056	196	0	1	1	1923	6	0.00312012	268	0	1	1	7087	16	0.00225765	963	0	1	1	1
AT1G15780.1	1267	539	0.425414	168	89	1.33227e-15	2.10526e-14	3583	12	0.00334915	459	5	0.657854	1	8349	23	0.00275482	1082	2	0.693903	1	1167	2	0.0017138	161	0	1	1	2943	6	0.00203874	435	0	1	1	6576	13	0.00197689	960	0	1	1	1
AT1G15940.1	1133	508	0.448367	113	60	4.68484e-11	4.89293e-10	2835	10	0.00352734	264	0	1	1	8715	21	0.00240964	847	1	0.848636	1	810	1	0.00123457	100	0	1	1	1820	8	0.0043956	221	0	1	1	5618	10	0.00177999	697	0	1	1	1
AT1G16190.1	505	229	0.453465	52	28	4.54682e-06	2.83458e-05	1034	3	0.00290135	113	0	1	1	3111	10	0.0032144	346	0	1	1	359	1	0.00278552	48	0	1	1	698	0	0	107	0	1	1	1913	2	0.00104548	318	0	1	1	1
AT1G16250.1	383	158	0.412533	50	20	0.0101689	0.0410478	807	1	0.00123916	98	0	1	1	2674	5	0.00186986	346	0	1	1	326	0	0	44	0	1	1	675	2	0.00296296	90	0	1	1	2219	3	0.00135196	308	0	1	1	1
AT1G16270.1	1301	551	0.42352	156	82	3.17524e-14	4.41433e-13	2725	8	0.00293578	329	2	0.910267	1	8073	16	0.00198192	991	1	0.890197	1	1101	5	0.00454133	155	0	1	1	2064	2	0.000968992	310	0	1	1	6065	6	0.000989283	934	0	1	1	1
AT1G16480.1	1463	457	0.312372	169	74	2.35981e-08	1.88624e-07	1604	2	0.00124688	184	0	1	1	6295	11	0.00174742	771	0	1	1	1162	1	0.000860585	165	0	1	1	1204	5	0.00415282	174	0	1	1	5131	10	0.00194894	754	0	1	1	1
AT1G16540.1	1167	435	0.372751	108	51	1.93174e-07	1.39997e-06	2426	4	0.0016488	220	0	1	1	8028	27	0.00336323	720	2	0.476314	1	764	3	0.0039267	101	0	1	1	1602	3	0.00187266	209	0	1	1	5365	14	0.00260951	701	0	1	1	1
AT1G16560.1	294	148	0.503401	41	29	4.90715e-10	4.66151e-09	759	1	0.00131752	85	1	0.647107	1	2412	13	0.00538972	305	0	1	1	300	0	0	46	0	1	1	608	1	0.00164474	84	0	1	1	2258	9	0.00398583	322	0	1	1	1
AT1G16570.1	729	256	0.351166	72	30	0.00087888	0.00410895	1156	6	0.00519031	110	1	0.740225	1	4446	5	0.00112461	436	0	1	1	550	0	0	70	0	1	1	909	4	0.00440044	110	0	1	1	3286	6	0.00182593	422	0	1	1	1
AT1G16610.1	734	192	0.26158	96	35	0.00524313	0.0220799	800	3	0.00375	97	1	0.695364	1	3110	7	0.0022508	374	0	1	1	682	1	0.00146628	108	1	0.999852	1	655	3	0.00458015	100	1	0.480652	1	2393	6	0.00250731	387	0	1	1	1
AT1G16650.1	783	296	0.378033	86	44	7.1709e-08	5.42121e-07	1224	8	0.00653595	133	1	0.804028	1	4390	15	0.00341686	480	0	1	1	617	1	0.00162075	86	0	1	1	973	5	0.00513875	133	1	0.581631	1	3371	7	0.00207654	479	0	1	1	1
AT1G16680.1	782	490	0.626598	80	54	4.44089e-16	7.22206e-15	1323	3	0.00226757	135	0	1	1	4766	9	0.00188838	497	0	1	1	600	4	0.00666667	79	0	1	1	1016	3	0.00295276	133	0	1	1	3640	6	0.00164835	493	0	1	1	1
AT1G16690.1	715	251	0.351049	85	43	1.52337e-07	1.11872e-06	1010	6	0.00594059	116	3	0.168721	1	3273	19	0.00580507	396	1	0.58635	1	519	1	0.00192678	81	0	1	1	741	0	0	110	0	1	1	2589	5	0.00193125	391	0	1	1	1
AT1G16700.1	336	115	0.342262	44	18	0.011079	0.0444709	547	0	0	70	0	1	1	1659	4	0.00241109	215	0	1	1	265	2	0.00754717	39	0	1	1	446	1	0.00224215	63	0	1	1	1383	0	0	198	0	1	1	1
AT1G16710.1	1720	1163	0.676163	232	180	0	0	4342	23	0.0052971	523	2	0.987733	1	11522	37	0.00321125	1394	2	0.816175	1	1595	0	0	231	0	1	1	3564	5	0.00140292	523	0	1	1	9292	24	0.00258287	1416	0	1	1	1
AT1G16800.1	2887	1278	0.442674	304	167	0	0	4901	14	0.00285656	499	1	0.99779	1	18420	45	0.002443	1901	1	0.985557	1	2161	9	0.00416474	282	1	1	1	3490	8	0.00229226	470	2	0.81193	1	12475	24	0.00192385	1753	1	0.906346	1	1
AT1G16830.1	1212	342	0.282178	120	48	0.000104324	0.000551388	1091	3	0.00274977	112	1	0.746514	1	3894	8	0.00205444	437	1	0.622479	1	934	1	0.00107066	120	0	1	1	867	2	0.00230681	107	0	1	1	2816	8	0.00284091	432	0	1	1	1
AT1G16860.1	352	146	0.414773	52	25	0.00016821	0.000865504	974	1	0.00102669	143	1	0.826629	1	3067	14	0.00456472	452	0	1	1	325	1	0.00307692	52	0	1	1	884	0	0	140	0	1	1	2840	4	0.00140845	451	0	1	1	1
AT1G16870.1	1115	276	0.247534	116	37	0.0389876	0.1426	1197	5	0.00417711	126	2	0.454765	1	3836	15	0.00391032	420	1	0.607898	1	828	0	0	116	0	1	1	945	0	0	126	0	1	1	3042	6	0.00197239	417	0	1	1	1
AT1G16970.1	1020	510	0.5	94	60	5.55112e-16	8.99404e-15	1873	7	0.00373732	161	1	0.860946	1	6285	22	0.0035004	532	1	0.694528	1	818	2	0.00244499	94	0	1	1	1383	3	0.0021692	161	0	1	1	4285	6	0.00140023	524	0	1	1	1
AT1G17040.1	847	310	0.365998	86	34	0.00126072	0.00579421	1574	6	0.00381194	151	0	1	1	5739	15	0.0026137	572	0	1	1	660	1	0.00151515	86	1	0.999108	1	1178	2	0.00169779	147	0	1	1	4307	28	0.00650104	550	0	1	1	1
AT1G17070.1	840	240	0.285714	115	36	0.0532645	0.190552	1330	4	0.00300752	180	0	1	1	4445	11	0.00247469	643	0	1	1	803	9	0.011208	123	2	0.999502	1	1259	3	0.00238284	188	0	1	1	4191	21	0.00501074	687	0	1	1	1
AT1G17110.1	1345	583	0.433457	157	87	0	0	2034	7	0.00344149	233	4	0.316249	1	6818	23	0.00337342	772	1	0.821093	1	1219	3	0.00246103	158	0	1	1	1611	7	0.00434513	218	1	0.760283	1	5561	8	0.00143859	748	0	1	1	1
AT1G17145.1	448	138	0.308036	38	14	0.0578894	0.205882	935	7	0.00748663	79	2	0.250233	1	3516	6	0.00170648	307	0	1	1	297	0	0	38	0	1	1	617	1	0.00162075	78	0	1	1	2246	5	0.00222618	306	0	1	1	1
AT1G17210.1	1176	429	0.364796	152	74	6.72788e-11	6.91832e-10	2367	4	0.0016899	286	1	0.969943	1	6645	22	0.00331076	819	0	1	1	955	1	0.00104712	150	0	1	1	1741	1	0.000574383	287	0	1	1	5068	10	0.00197316	835	0	1	1	1
AT1G17220.1	1315	512	0.389354	159	80	1.34048e-12	1.61514e-11	1990	8	0.0040201	233	5	0.15712	1	6965	21	0.00301508	910	1	0.868468	1	1152	5	0.00434028	163	3	0.999817	1	1629	4	0.00245549	237	1	0.788341	1	5615	17	0.0030276	905	0	1	1	1
AT1G17230.1	1273	286	0.224666	152	51	0.00641955	0.0266968	2744	4	0.00145773	293	1	0.972413	1	8008	11	0.00137363	924	0	1	1	871	4	0.00459242	141	0	1	1	1807	5	0.00276702	270	1	0.829495	1	5415	13	0.00240074	871	1	0.691688	1	1
AT1G17280.1	353	217	0.614731	40	28	1.43498e-09	1.30925e-08	592	7	0.0118243	64	3	0.0434712	1	1978	10	0.00505561	215	0	1	1	307	0	0	39	0	1	1	472	0	0	63	0	1	1	1687	3	0.0017783	211	0	1	1	1
AT1G17350.1	402	140	0.348259	40	16	0.0203332	0.0783408	661	5	0.0075643	61	2	0.170293	1	2219	6	0.00270392	205	1	0.366801	1	352	0	0	40	0	1	1	534	0	0	61	0	1	1	1744	3	0.00172018	205	0	1	1	1
AT1G17360.1	1502	538	0.358189	151	71	1.12386e-09	1.03562e-08	2468	7	0.0028363	236	0	1	1	8928	19	0.00212814	903	1	0.8664	1	1191	3	0.00251889	151	0	1	1	1883	8	0.00424854	236	0	1	1	6835	18	0.0026335	898	1	0.702731	1	1
AT1G17370.1	606	270	0.445545	66	39	1.86715e-09	1.68655e-08	1385	2	0.00144404	143	0	1	1	3697	13	0.00351636	414	1	0.602619	1	433	17	0.039261	60	2	0.954515	1	988	4	0.00404858	132	0	1	1	2534	7	0.00276243	363	0	1	1	1
AT1G17450.1	2245	1018	0.453452	266	154	0	0	3532	17	0.00481314	407	6	0.376436	1	12132	45	0.0037092	1383	2	0.812736	1	1733	1	0.000577034	274	0	1	1	2559	3	0.00117233	407	0	1	1	9162	17	0.00185549	1437	1	0.856477	1	1
AT1G17470.1	543	151	0.278085	58	21	0.0286336	0.107574	856	1	0.00116822	90	0	1	1	3417	8	0.00234124	358	0	1	1	378	0	0	60	0	1	1	571	2	0.00350263	95	0	1	1	2198	2	0.000909918	358	0	1	1	1
AT1G17500.1	1379	530	0.384336	156	79	1.19604e-12	1.44692e-11	2224	10	0.0044964	253	0	1	1	8718	25	0.00286763	1045	2	0.675625	1	1166	2	0.00171527	155	0	1	1	1768	2	0.00113122	244	0	1	1	7372	13	0.00176343	1060	1	0.761161	1	1
AT1G17550.1	662	302	0.456193	81	39	2.77481e-06	1.78077e-05	1068	4	0.00374532	124	0	1	1	3660	4	0.0010929	455	0	1	1	551	1	0.00181488	76	1	0.997983	1	919	1	0.00108814	123	0	1	1	3003	4	0.001332	448	0	1	1	1
AT1G17580.1	2065	1344	0.650847	232	181	0	0	3787	19	0.00501716	395	1	0.992096	1	12659	35	0.00276483	1289	1	0.94349	1	1925	2	0.00103896	231	0	1	1	3237	5	0.00154464	393	0	1	1	10753	20	0.00185995	1297	0	1	1	1
AT1G17650.1	519	130	0.250482	55	24	0.00129865	0.00595257	811	1	0.00123305	83	0	1	1	3446	5	0.00145096	351	0	1	1	465	0	0	56	0	1	1	701	1	0.00142653	83	0	1	1	2708	7	0.00258493	349	0	1	1	1
AT1G17720.1	783	417	0.532567	86	54	4.45199e-14	6.1413e-13	1311	3	0.00228833	134	0	1	1	4251	12	0.00282287	418	3	0.0678088	1	743	0	0	90	0	1	1	1133	3	0.00264784	140	0	1	1	3606	7	0.00194121	434	0	1	1	1
AT1G17760.1	1013	509	0.502468	108	66	4.44089e-16	7.22206e-15	1928	6	0.00311203	194	1	0.907197	1	6815	17	0.0024945	676	2	0.444106	1	817	1	0.00122399	108	0	1	1	1468	3	0.0020436	192	0	1	1	5178	12	0.0023175	676	0	1	1	1
AT1G17870.1	1054	384	0.364326	126	56	6.19206e-07	4.29551e-06	984	2	0.00203252	110	0	1	1	4146	11	0.00265316	477	1	0.654683	1	911	3	0.00329308	132	0	1	1	879	1	0.00113766	113	0	1	1	3118	10	0.00320718	463	0	1	1	1
AT1G17890.1	394	146	0.370558	64	36	4.64157e-08	3.57779e-07	504	2	0.00396825	83	1	0.638351	1	1498	4	0.00267023	268	0	1	1	388	1	0.00257732	69	0	1	1	516	1	0.00193798	86	0	1	1	1629	7	0.00429711	283	1	0.317715	1	1
AT1G17930.1	683	260	0.380673	74	43	5.88404e-10	5.55649e-09	758	3	0.00395778	84	1	0.642756	1	3708	6	0.00161812	418	0	1	1	494	0	0	71	0	1	1	551	1	0.00181488	85	1	0.42702	1	2679	4	0.00149309	396	0	1	1	1
AT1G17940.1	602	164	0.272425	66	23	0.0355288	0.130897	859	1	0.00116414	89	0	1	1	3574	10	0.00279799	374	0	1	1	469	0	0	65	0	1	1	563	1	0.0017762	85	0	1	1	2487	4	0.00160836	352	0	1	1	1
AT1G17980.1	1119	439	0.392315	105	49	5.18217e-07	3.61269e-06	1731	6	0.0034662	177	1	0.885703	1	6693	16	0.00239056	649	0	1	1	734	1	0.0013624	100	0	1	1	1070	1	0.000934579	160	0	1	1	3992	5	0.00125251	591	0	1	1	1
AT1G18160.1	995	463	0.465327	115	70	1.11022e-16	1.90152e-15	2662	8	0.00300526	303	3	0.714682	1	8039	13	0.00161712	874	0	1	1	736	20	0.0271739	105	2	0.998123	1	1928	3	0.00155602	277	1	0.837138	1	5223	12	0.00229753	725	0	1	1	1
AT1G18270.1	1849	644	0.348296	192	88	6.85284e-11	7.04228e-10	3993	20	0.00500877	401	0	1	1	12622	28	0.00221835	1251	1	0.938495	1	1590	3	0.00188679	195	0	1	1	3180	5	0.00157233	400	0	1	1	10136	23	0.00226914	1260	0	1	1	1
AT1G18340.1	426	119	0.279343	40	16	0.0203332	0.0783408	877	2	0.0022805	80	0	1	1	2992	7	0.00233957	271	0	1	1	306	1	0.00326797	39	0	1	1	590	1	0.00169492	77	0	1	1	1923	0	0	253	0	1	1	1
AT1G18460.1	993	340	0.342397	126	58	8.98887e-08	6.71382e-07	1331	7	0.0052592	163	3	0.319293	1	4814	18	0.00373909	616	1	0.74669	1	904	1	0.00110619	126	0	1	1	1116	2	0.00179211	161	0	1	1	4233	5	0.0011812	613	0	1	1	1
AT1G18470.1	840	332	0.395238	84	42	3.20147e-07	2.27482e-06	1288	5	0.00388199	126	1	0.786476	1	4209	6	0.00142552	430	0	1	1	633	1	0.00157978	82	0	1	1	1043	4	0.00383509	122	1	0.550366	1	3271	9	0.00275145	421	1	0.433758	1	1
AT1G18550.1	978	134	0.137014	99	29	0.149467	0.485883	1647	7	0.00425015	159	1	0.857496	1	6068	15	0.00247198	645	0	1	1	722	2	0.00277008	96	0	1	1	1191	1	0.000839631	155	0	1	1	4410	9	0.00204082	587	1	0.547508	1	1
AT1G18560.1	940	237	0.252128	101	38	0.00198398	0.00888597	1603	12	0.00748596	167	2	0.604786	1	5449	15	0.0027528	573	0	1	1	715	4	0.00559441	101	0	1	1	1160	2	0.00172414	165	0	1	1	3874	9	0.00232318	564	0	1	1	1
AT1G18580.1	720	203	0.281944	90	33	0.00595855	0.0249396	1174	5	0.00425894	134	1	0.806414	1	4131	8	0.00193658	488	0	1	1	567	2	0.00352734	86	0	1	1	812	2	0.00246305	127	0	1	1	3008	10	0.00332447	474	0	1	1	1
AT1G18610.1	751	355	0.472703	86	49	1.00672e-10	1.01992e-09	1179	1	0.000848176	133	0	1	1	4684	12	0.00256191	516	1	0.683436	1	655	0	0	80	0	1	1	993	0	0	128	0	1	1	3842	12	0.00312337	496	0	1	1	1
AT1G18620.1	1146	367	0.320244	127	56	8.45844e-07	5.73022e-06	2504	10	0.00399361	263	3	0.622287	1	7567	14	0.00185014	829	0	1	1	893	6	0.00671892	125	1	0.999963	1	1947	5	0.00256805	267	0	1	1	6104	12	0.00196592	844	0	1	1	1
AT1G18640.2	390	182	0.466667	44	24	1.61847e-05	9.45334e-05	646	5	0.00773994	68	2	0.200986	1	2635	9	0.00341556	287	1	0.472581	1	321	0	0	42	0	1	1	566	2	0.00353357	66	0	1	1	2294	7	0.00305144	281	1	0.315869	1	1
AT1G18660.1	907	243	0.267916	84	32	0.00343787	0.0148597	1600	4	0.0025	143	1	0.826629	1	5069	17	0.00335372	427	1	0.613969	1	693	1	0.001443	84	0	1	1	1178	8	0.00679117	143	0	1	1	3540	6	0.00169492	421	0	1	1	1
AT1G18690.1	448	278	0.620536	82	64	0	0	797	1	0.00125471	131	1	0.799165	1	2347	14	0.00596506	389	4	0.0117445	0.393323	501	1	0.00199601	81	1	0.998659	1	745	1	0.00134228	119	0	1	1	2111	9	0.00426338	337	0	1	1	1
AT1G18700.1	1289	354	0.274631	123	45	0.00158817	0.00721487	2247	11	0.00489542	197	1	0.910547	1	6381	22	0.00344774	601	0	1	1	923	3	0.00325027	110	0	1	1	1521	5	0.00328731	188	0	1	1	4515	11	0.00243632	559	1	0.530064	1	1
AT1G18840.1	829	258	0.311218	90	39	5.85469e-05	0.000319069	1277	6	0.00469851	137	0	1	1	4366	13	0.00297755	469	1	0.64847	1	508	1	0.0019685	81	0	1	1	908	2	0.00220264	129	0	1	1	2968	8	0.00269542	453	0	1	1	1
AT1G19100.1	874	460	0.526316	92	57	2.08722e-14	2.97587e-13	1607	3	0.00186683	178	1	0.887095	1	5788	21	0.0036282	591	1	0.732173	1	688	1	0.00145349	87	0	1	1	1238	4	0.00323102	167	0	1	1	4240	14	0.00330189	560	1	0.530699	1	1
AT1G19110.1	1192	317	0.26594	143	44	0.0467894	0.169138	2096	6	0.0028626	218	1	0.930843	1	6016	24	0.00398936	611	0	1	1	1018	3	0.00294695	144	1	0.999992	1	1739	3	0.00172513	219	0	1	1	4854	16	0.00329625	610	0	1	1	1
AT1G19230.1	1753	383	0.218483	244	66	0.177162	0.566059	1916	10	0.00521921	245	5	0.180995	1	5804	18	0.00310131	746	0	1	1	1583	5	0.00315856	243	1	1	1	1608	5	0.00310945	233	0	1	1	4852	9	0.00185491	712	0	1	1	1
AT1G19270.1	760	165	0.217105	82	28	0.0288283	0.108035	1251	3	0.00239808	126	0	1	1	4538	10	0.00220361	456	0	1	1	595	1	0.00168067	78	0	1	1	900	2	0.00222222	119	0	1	1	3250	5	0.00153846	422	0	1	1	1
AT1G19290.1	1212	370	0.305281	164	61	0.00016078	0.000828699	1316	2	0.00151976	162	1	0.86264	1	6034	13	0.00215446	780	0	1	1	1043	14	0.0134228	144	3	0.999313	1	1102	2	0.00181488	150	0	1	1	4616	13	0.00281629	691	0	1	1	1
AT1G19360.1	715	166	0.232168	83	29	0.0193224	0.0746884	890	3	0.00337079	95	0	1	1	3122	12	0.00384369	355	0	1	1	536	0	0	76	0	1	1	599	3	0.00500835	93	0	1	1	2203	3	0.00136178	357	0	1	1	1
AT1G19370.1	1072	278	0.259328	146	62	1.10667e-06	7.4384e-06	827	6	0.00725514	114	3	0.162806	1	2525	8	0.00316832	357	0	1	1	1134	1	0.000881834	148	1	0.999994	1	860	0	0	119	0	1	1	2735	3	0.00109689	407	0	1	1	1
AT1G19440.1	1000	379	0.379	124	63	1.79577e-10	1.774e-09	876	2	0.00228311	112	1	0.746514	1	3291	14	0.00425403	422	1	0.609642	1	824	1	0.00121359	108	0	1	1	678	4	0.00589971	91	0	1	1	2293	5	0.00218055	332	0	1	1	1
AT1G19450.1	960	283	0.294792	84	34	0.000773995	0.00364809	1322	2	0.00151286	112	0	1	1	5188	24	0.00462606	444	1	0.628324	1	686	0	0	83	0	1	1	897	3	0.00334448	111	0	1	1	3546	10	0.00282008	441	0	1	1	1
AT1G19485.1	1177	342	0.290569	121	47	0.00027535	0.0013742	2345	3	0.00127932	236	1	0.944532	1	6640	28	0.00421687	691	1	0.785689	1	867	1	0.0011534	114	1	0.999909	1	1734	10	0.00576701	222	2	0.425718	1	4740	9	0.00189873	636	0	1	1	1
AT1G19490.1	619	205	0.331179	88	40	1.21592e-05	7.20316e-05	894	2	0.00223714	121	1	0.772984	1	2646	8	0.00302343	368	1	0.559709	1	618	1	0.00161812	87	0	1	1	928	1	0.00107759	122	0	1	1	2649	8	0.00302001	372	0	1	1	1
AT1G19580.1	443	107	0.241535	53	20	0.0204001	0.0785227	458	2	0.00436681	58	1	0.508715	1	2038	4	0.00196271	265	1	0.446071	1	340	3	0.00882353	51	0	1	1	328	0	0	50	0	1	1	1425	2	0.00140351	238	0	1	1	1
AT1G19720.1	1298	399	0.307396	142	67	2.71163e-09	2.39217e-08	1826	9	0.00492881	196	4	0.217803	1	6334	34	0.00536786	741	1	0.808292	1	1138	2	0.00175747	140	0	1	1	1498	4	0.00267023	191	0	1	1	4982	8	0.00160578	700	0	1	1	1
AT1G19850.1	1087	400	0.367985	128	69	6.68798e-13	8.26372e-12	2393	9	0.00376097	285	4	0.457739	1	6900	13	0.00188406	819	0	1	1	838	4	0.00477327	119	0	1	1	1754	11	0.00627138	245	0	1	1	5104	23	0.00450627	739	1	0.631503	1	1
AT1G19860.1	384	200	0.520833	55	37	2.10812e-11	2.27197e-10	760	0	0	100	0	1	1	2664	5	0.00187688	361	0	1	1	337	0	0	56	0	1	1	583	2	0.00343053	96	0	1	1	2178	1	0.000459137	362	0	1	1	1
AT1G19870.1	890	317	0.35618	104	47	2.6946e-06	1.73277e-05	2026	4	0.00197433	216	0	1	1	5521	8	0.00144901	614	0	1	1	824	4	0.00485437	107	1	0.99984	1	1769	3	0.00169587	224	0	1	1	4756	8	0.00168209	641	0	1	1	1
AT1G20200.1	709	280	0.394922	93	43	3.3858e-06	2.13744e-05	917	4	0.00436205	112	0	1	1	3202	16	0.00499688	403	1	0.592754	1	681	1	0.00146843	101	1	0.999738	1	760	2	0.00263158	120	0	1	1	2818	8	0.00283889	428	0	1	1	1
AT1G20380.1	1187	270	0.227464	122	42	0.0077004	0.0316585	1445	5	0.00346021	144	0	1	1	6009	16	0.00266267	599	0	1	1	1098	1	0.000910747	135	0	1	1	1211	2	0.00165153	155	0	1	1	5225	15	0.00287081	626	0	1	1	1
AT1G20630.1	720	322	0.447222	93	63	0	0	1207	4	0.003314	155	3	0.292792	1	3293	6	0.00182205	426	1	0.613107	1	645	2	0.00310078	84	0	1	1	962	2	0.002079	126	0	1	1	2688	8	0.00297619	373	0	1	1	1
AT1G20640.1	920	409	0.444565	126	72	3.77476e-15	5.74546e-14	1525	5	0.00327869	190	1	0.902535	1	5796	15	0.00258799	728	0	1	1	789	3	0.00380228	114	0	1	1	1218	2	0.00164204	176	0	1	1	4651	8	0.00172006	694	0	1	1	1
AT1G20670.1	1008	338	0.335317	148	70	1.06645e-09	9.83663e-09	1271	4	0.00314713	167	0	1	1	3657	20	0.00546896	509	1	0.678458	1	953	2	0.00209864	137	0	1	1	1213	3	0.00247321	163	0	1	1	3408	11	0.0032277	480	1	0.477138	1	1
AT1G20760.1	1007	502	0.49851	131	83	0	0	2649	5	0.0018875	345	1	0.985413	1	6733	21	0.00311897	892	2	0.590537	1	890	1	0.0011236	135	1	0.999984	1	2242	3	0.00133809	339	0	1	1	5548	16	0.00288392	885	0	1	1	1
AT1G20780.1	890	285	0.320225	122	53	2.82974e-06	1.81166e-05	1448	6	0.00414365	188	4	0.197673	1	5415	16	0.00295476	735	0	1	1	806	12	0.0148883	122	2	0.999463	1	1192	2	0.00167785	180	0	1	1	4765	14	0.00293809	710	0	1	1	1
AT1G20830.1	727	167	0.229711	67	23	0.0419954	0.153076	1028	2	0.00194553	101	0	1	1	3044	4	0.00131406	295	0	1	1	476	10	0.0210084	68	3	0.90976	1	706	2	0.00283286	104	0	1	1	1990	6	0.00301508	295	0	1	1	1
AT1G20870.1	725	277	0.382069	84	40	2.95129e-06	1.8852e-05	1036	4	0.003861	119	1	0.767351	1	2735	6	0.00219378	329	0	1	1	496	1	0.00201613	79	0	1	1	694	2	0.00288184	110	1	0.513588	1	1843	4	0.00217037	300	0	1	1	1
AT1G20910.1	443	214	0.48307	53	31	1.1686e-07	8.64133e-07	953	6	0.00629591	105	0	1	1	3964	13	0.00327952	400	0	1	1	402	0	0	52	0	1	1	828	1	0.00120773	103	0	1	1	3144	9	0.0028626	397	0	1	1	1
AT1G20960.1	2146	1341	0.624884	309	228	0	0	3936	8	0.00203252	555	3	0.96527	1	12944	29	0.00224042	1857	2	0.918049	1	1823	5	0.00274273	289	0	1	1	3305	7	0.002118	521	0	1	1	9634	25	0.00259498	1634	1	0.890013	1	1
AT1G20980.1	1291	580	0.449264	155	88	0	0	2200	7	0.00318182	258	2	0.82289	1	6869	24	0.00349396	870	2	0.577016	1	1115	3	0.00269058	159	0	1	1	1837	1	0.000544366	262	0	1	1	5800	12	0.00206897	832	1	0.675009	1	1
AT1G21060.1	1028	230	0.223735	90	28	0.0859556	0.295303	1313	6	0.00456969	114	1	0.752651	1	4775	10	0.00209424	441	0	1	1	758	0	0	90	0	1	1	960	1	0.00104167	114	0	1	1	3440	7	0.00203488	432	0	1	1	1
AT1G21080.1	636	221	0.347484	61	25	0.00298093	0.0130254	1025	6	0.00585366	95	2	0.322135	1	3928	12	0.00305499	368	0	1	1	420	0	0	59	0	1	1	624	5	0.00801282	90	0	1	1	2573	5	0.00194326	361	0	1	1	1
AT1G21150.1	765	170	0.222222	79	30	0.00476725	0.0201555	662	1	0.00151057	74	0	1	1	3319	14	0.00421814	340	1	0.531352	1	571	0	0	74	0	1	1	523	1	0.00191205	67	0	1	1	2320	6	0.00258621	311	0	1	1	1
AT1G21160.1	1095	312	0.284932	112	45	0.000149097	0.000770814	1918	4	0.00208551	203	0	1	1	8006	18	0.00224831	864	2	0.573272	1	923	4	0.00433369	112	0	1	1	1617	6	0.00371058	207	0	1	1	6388	14	0.00219161	886	0	1	1	1
AT1G21170.1	1443	584	0.404712	164	83	3.42837e-13	4.37349e-12	2639	8	0.00303145	280	2	0.855967	1	8422	28	0.00332463	927	2	0.611377	1	1235	5	0.00404858	158	0	1	1	2116	4	0.00189036	276	0	1	1	6789	15	0.00220946	885	0	1	1	1
AT1G21200.1	297	105	0.353535	41	21	0.000179984	0.000924009	507	2	0.00394477	73	2	0.223271	1	2862	7	0.00244584	405	1	0.594566	1	303	1	0.00330033	39	0	1	1	536	0	0	74	0	1	1	2336	4	0.00171233	316	0	1	1	1
AT1G21380.1	552	251	0.45471	59	34	4.8186e-08	3.70296e-07	1314	4	0.00304414	144	3	0.256637	1	4263	7	0.00164204	470	0	1	1	447	0	0	60	0	1	1	1009	1	0.00099108	141	0	1	1	3280	5	0.00152439	468	0	1	1	1
AT1G21410.1	292	121	0.414384	40	20	0.000386067	0.00188827	839	0	0	115	0	1	1	2394	3	0.00125313	320	0	1	1	295	0	0	45	0	1	1	810	1	0.00123457	119	0	1	1	2078	5	0.00240616	328	0	1	1	1
AT1G21450.1	703	324	0.460882	91	56	5.32907e-14	7.31752e-13	939	1	0.00106496	114	0	1	1	4229	12	0.00283755	517	0	1	1	653	1	0.00153139	94	0	1	1	877	3	0.00342075	112	1	0.519921	1	3862	9	0.0023304	515	0	1	1	1
AT1G21580.1	2372	1210	0.510118	295	174	0	0	4853	16	0.00329693	563	5	0.815243	1	14367	48	0.00334099	1806	3	0.765331	1	2135	3	0.00140515	296	0	1	1	3937	7	0.001778	541	0	1	1	11621	18	0.00154892	1686	0	1	1	1
AT1G21590.1	1146	380	0.331588	132	56	3.68245e-06	2.31679e-05	1602	3	0.00187266	178	0	1	1	6066	9	0.00148368	665	0	1	1	892	3	0.00336323	128	0	1	1	1207	0	0	168	0	1	1	4223	7	0.00165759	624	0	1	1	1
AT1G21630.1	1335	660	0.494382	181	110	0	0	2815	4	0.00142096	373	1	0.98965	1	7728	18	0.00232919	1057	3	0.418217	1	1142	10	0.00875657	184	2	0.999995	1	2184	7	0.00320513	354	1	0.901662	1	6225	14	0.002249	993	1	0.738535	1	1
AT1G21640.1	1513	602	0.397885	173	81	1.04035e-10	1.0531e-09	2177	8	0.00367478	253	0	1	1	6785	22	0.00324245	792	3	0.259556	1	1141	1	0.000876424	175	0	1	1	1762	4	0.00227015	253	0	1	1	5064	9	0.00177725	787	0	1	1	1
AT1G21650.1	1587	586	0.36925	160	79	6.34892e-12	7.20992e-11	2697	10	0.00370782	262	1	0.959665	1	9737	34	0.00349184	942	0	1	1	1166	4	0.00343053	159	1	0.999998	1	1920	2	0.00104167	258	0	1	1	6916	15	0.00216888	935	0	1	1	1
AT1G21660.1	845	401	0.474556	95	47	9.90202e-08	7.36071e-07	1298	5	0.00385208	141	1	0.822328	1	4139	10	0.00241604	456	1	0.638134	1	647	1	0.0015456	90	0	1	1	1018	0	0	138	0	1	1	3213	7	0.00217865	437	0	1	1	1
AT1G21700.1	961	447	0.46514	133	66	2.48058e-10	2.4157e-09	1698	5	0.00294464	220	2	0.749472	1	5387	19	0.00352701	652	1	0.766224	1	815	1	0.00122699	116	0	1	1	1249	6	0.00480384	189	0	1	1	3872	8	0.00206612	564	0	1	1	1
AT1G21730.1	1643	559	0.340231	152	58	0.000103151	0.000546695	2833	9	0.00317684	260	1	0.958665	1	7899	14	0.00177238	713	0	1	1	1101	1	0.000908265	146	0	1	1	1991	6	0.00301356	257	0	1	1	5478	12	0.00219058	724	0	1	1	1
AT1G21780.1	525	170	0.32381	60	28	0.000134463	0.000701261	698	2	0.00286533	78	0	1	1	2299	6	0.00260983	285	0	1	1	522	1	0.00191571	61	0	1	1	665	3	0.00451128	79	0	1	1	2262	4	0.00176835	293	0	1	1	1
AT1G22040.1	428	173	0.404206	64	30	7.09516e-05	0.00038358	628	1	0.00159236	93	0	1	1	2559	6	0.00234467	389	0	1	1	399	1	0.00250627	58	0	1	1	593	0	0	93	0	1	1	2475	5	0.0020202	390	0	1	1	1
AT1G22060.1	2060	990	0.480583	223	137	0	0	4787	11	0.00229789	497	2	0.983857	1	15238	44	0.00288752	1596	1	0.971495	1	1632	3	0.00183824	216	0	1	1	3634	6	0.00165107	488	1	0.959127	1	11098	26	0.00234276	1520	1	0.8717	1	1
AT1G22070.1	565	255	0.451327	70	45	1.68265e-12	2.00906e-11	1177	4	0.00339847	123	1	0.77848	1	3068	9	0.00293351	333	1	0.523982	1	447	0	0	65	0	1	1	903	2	0.00221484	118	0	1	1	2525	3	0.00118812	320	0	1	1	1
AT1G22150.1	1805	309	0.171191	182	53	0.0786408	0.272278	1478	6	0.00405954	146	0	1	1	5493	18	0.0032769	563	0	1	1	1361	8	0.00587803	174	1	0.999999	1	1124	0	0	138	0	1	1	4013	14	0.00348866	512	1	0.499259	1	1
AT1G22620.1	1544	807	0.522668	176	113	0	0	1996	6	0.00300601	225	1	0.936528	1	7390	24	0.00324763	805	3	0.267296	1	1354	5	0.00369276	176	0	1	1	1684	4	0.0023753	227	0	1	1	6121	14	0.00228721	805	0	1	1	1
AT1G22730.1	855	235	0.274854	108	44	0.000120394	0.000630972	1262	5	0.00396197	152	2	0.553752	1	4546	11	0.00241971	577	0	1	1	788	1	0.00126904	113	0	1	1	1083	1	0.000923361	150	0	1	1	3981	7	0.00175835	586	0	1	1	1
AT1G22750.1	378	95	0.251323	43	17	0.0193261	0.0746884	555	0	0	49	0	1	1	2670	10	0.00374532	229	0	1	1	334	31	0.0928144	40	4	0.384475	1	373	0	0	47	0	1	1	1862	3	0.00161117	224	0	1	1	1
AT1G22770.1	1334	651	0.488006	183	116	0	0	2574	10	0.003885	342	1	0.984867	1	7591	18	0.00237123	1004	0	1	1	1158	23	0.0198618	177	5	0.998542	1	2161	5	0.00231374	332	0	1	1	6211	20	0.00322009	954	0	1	1	1
AT1G22830.1	965	235	0.243523	102	35	0.0147812	0.0581256	1559	6	0.00384862	161	3	0.312661	1	5295	18	0.00339943	604	2	0.389132	1	785	2	0.00254777	100	0	1	1	1171	1	0.000853971	151	0	1	1	3922	7	0.0017848	560	0	1	1	1
AT1G22860.1	1451	487	0.335631	158	64	5.12154e-06	3.18081e-05	2349	3	0.00127714	253	0	1	1	7755	23	0.00296583	874	1	0.857478	1	1034	2	0.00193424	153	0	1	1	1796	3	0.00167038	247	0	1	1	5690	13	0.00228471	841	0	1	1	1
AT1G22870.1	1372	445	0.324344	171	58	0.00296197	0.0129472	2345	3	0.00127932	285	1	0.969572	1	6516	20	0.00306937	769	1	0.819892	1	1168	7	0.00599315	166	1	0.999999	1	2009	6	0.00298656	277	0	1	1	5103	7	0.00137174	723	0	1	1	1
AT1G22930.1	1862	462	0.24812	186	69	6.91652e-05	0.000374555	2378	5	0.00210261	248	1	0.952117	1	9155	25	0.00273075	1039	1	0.901339	1	1434	4	0.0027894	174	1	0.999999	1	1727	7	0.00405327	230	0	1	1	6410	14	0.00218409	894	0	1	1	1
AT1G22960.1	870	278	0.31954	101	45	6.89332e-06	4.22932e-05	959	2	0.00208551	119	2	0.42601	1	4568	4	0.000875657	582	0	1	1	854	1	0.00117096	103	0	1	1	970	3	0.00309278	120	0	1	1	4221	8	0.00189529	563	0	1	1	1
AT1G23030.1	1283	234	0.182385	163	56	0.00251644	0.0110734	1215	2	0.00164609	151	0	1	1	3822	9	0.00235479	438	0	1	1	1224	0	0	179	0	1	1	1112	4	0.00359712	168	0	1	1	3125	8	0.00256	464	0	1	1	1
AT1G23180.1	1285	562	0.437354	153	94	0	0	1879	9	0.00478978	215	1	0.928253	1	4734	17	0.00359104	618	1	0.747817	1	1276	1	0.000783699	162	0	1	1	1803	3	0.00166389	234	0	1	1	4620	10	0.0021645	646	0	1	1	1
AT1G23190.1	921	403	0.437568	114	67	4.996e-15	7.56112e-14	1584	6	0.00378788	173	0	1	1	4416	14	0.00317029	505	0	1	1	911	2	0.00219539	111	0	1	1	1448	1	0.000690608	171	0	1	1	4047	7	0.00172968	485	0	1	1	1
AT1G23230.1	2416	1087	0.449917	293	181	0	0	4296	17	0.00395717	512	5	0.746952	1	11622	27	0.00232318	1366	2	0.80731	1	1979	7	0.00353714	292	1	1	1	3394	9	0.00265174	494	1	0.960703	1	8758	22	0.00251199	1289	0	1	1	1
AT1G23440.1	434	164	0.37788	42	22	8.21875e-05	0.000439276	537	3	0.00558659	53	0	1	1	2041	4	0.00195982	191	0	1	1	340	1	0.00294118	42	0	1	1	390	1	0.0025641	51	0	1	1	1263	3	0.0023753	192	0	1	1	1
AT1G23480.1	733	199	0.271487	70	32	7.58999e-05	0.000408353	1185	8	0.00675105	97	5	0.00684718	0.198432	5598	21	0.00375134	473	1	0.651591	1	496	82	0.165323	61	8	0.103026	0.671377	763	26	0.034076	90	6	3.02074e-05	0.00130676	3432	16	0.004662	424	1	0.436048	1	1
AT1G23780.1	767	140	0.182529	116	39	0.0150192	0.0589843	793	1	0.00126103	114	1	0.752651	1	2412	4	0.00165837	365	0	1	1	778	2	0.00257069	113	1	0.999902	1	785	2	0.00254777	114	0	1	1	2365	6	0.002537	368	0	1	1	1
AT1G23870.1	974	400	0.410678	131	67	3.30824e-11	3.50167e-10	1503	3	0.00199601	200	1	0.913775	1	5818	16	0.00275009	780	1	0.824255	1	851	1	0.00117509	120	0	1	1	1266	6	0.00473934	180	0	1	1	4833	16	0.00331057	703	1	0.613139	1	1
AT1G23880.1	658	201	0.305471	78	35	5.76885e-05	0.000314677	1185	2	0.00168776	146	0	1	1	3749	17	0.00453454	469	0	1	1	512	0	0	75	0	1	1	926	2	0.00215983	138	0	1	1	2803	9	0.00321085	435	1	0.444366	1	1
AT1G23900.1	869	479	0.551208	123	78	0	0	1797	6	0.0033389	234	2	0.779155	1	5846	18	0.00307903	758	1	0.815421	1	803	1	0.00124533	112	0	1	1	1518	4	0.00263505	201	0	1	1	4792	13	0.00271285	661	0	1	1	1
AT1G24030.1	592	312	0.527027	62	40	2.42374e-11	2.59002e-10	902	4	0.00443459	95	2	0.322135	1	3148	9	0.00285896	330	1	0.520788	1	458	1	0.00218341	61	0	1	1	736	3	0.00407609	93	0	1	1	2248	4	0.00177936	318	0	1	1	1
AT1G24120.1	676	279	0.412722	65	35	3.03713e-07	2.16414e-06	1421	7	0.00492611	136	0	1	1	3308	6	0.00181378	323	1	0.513252	1	506	1	0.00197628	65	0	1	1	1031	1	0.000969932	138	0	1	1	2157	6	0.00278164	321	0	1	1	1
AT1G24160.1	756	306	0.404762	84	49	3.15001e-11	3.34009e-10	888	5	0.00563063	101	1	0.709936	1	3817	13	0.00340582	501	0	1	1	611	1	0.00163666	77	0	1	1	749	1	0.00133511	96	0	1	1	3077	6	0.00194995	460	0	1	1	1
AT1G24280.1	1013	308	0.304047	117	50	9.28224e-06	5.59769e-05	1528	7	0.00458115	163	3	0.319293	1	4781	12	0.00250994	521	0	1	1	747	0	0	118	0	1	1	1048	1	0.000954198	157	0	1	1	3479	8	0.00229951	508	0	1	1	1
AT1G24290.1	560	157	0.280357	98	30	0.0927186	0.316252	714	3	0.00420168	116	2	0.413444	1	2724	7	0.00256975	441	0	1	1	571	1	0.00175131	95	0	1	1	624	1	0.00160256	108	0	1	1	2162	4	0.00185014	364	0	1	1	1
AT1G24320.1	1050	285	0.271429	94	39	0.000180935	0.000928493	2019	6	0.00297177	172	0	1	1	8224	16	0.00194553	741	1	0.808292	1	699	1	0.00143062	89	0	1	1	1354	4	0.00295421	169	0	1	1	5342	9	0.00168476	708	1	0.615744	1	1
AT1G24340.1	753	223	0.296149	90	36	0.000716417	0.00338635	1752	4	0.00228311	196	3	0.427545	1	5535	21	0.00379404	644	1	0.762018	1	592	2	0.00337838	86	0	1	1	1324	2	0.00151057	191	0	1	1	4077	5	0.00122639	618	0	1	1	1
AT1G24440.1	319	127	0.398119	47	23	0.000217688	0.0011012	412	2	0.00485437	59	1	0.514699	1	1697	1	0.000589275	234	1	0.406439	1	246	6	0.0243902	40	2	0.832026	1	297	1	0.003367	48	0	1	1	1228	3	0.002443	198	0	1	1	1
AT1G24460.1	1841	998	0.542097	200	122	0	0	4329	22	0.00508201	454	3	0.914728	1	13911	49	0.00352239	1557	2	0.860868	1	1491	17	0.0114017	186	3	0.999964	1	3300	8	0.00242424	414	1	0.933626	1	10627	20	0.001882	1424	0	1	1	1
AT1G24706.1	2748	1612	0.586608	303	198	0	0	4362	13	0.00298028	446	1	0.995769	1	14257	42	0.00294592	1553	1	0.968628	1	2197	20	0.00910332	287	1	1	1	3216	9	0.00279851	430	2	0.771295	1	10894	22	0.00201946	1476	0	1	1	1
AT1G24764.1	1191	376	0.315701	125	49	0.000159852	0.000824181	1628	4	0.002457	177	0	1	1	4552	16	0.00351494	539	0	1	1	1029	2	0.00194363	127	1	0.999969	1	1437	6	0.00417537	178	0	1	1	4068	8	0.00196657	560	0	1	1	1
AT1G25280.1	441	157	0.356009	70	39	1.85992e-08	1.50218e-07	587	1	0.00170358	90	1	0.66808	1	2185	5	0.00228833	306	0	1	1	638	1	0.0015674	103	1	0.999778	1	655	1	0.00152672	104	0	1	1	2195	5	0.0022779	347	0	1	1	1
AT1G25320.1	760	214	0.281579	87	36	0.000333995	0.00165416	1100	2	0.00181818	123	0	1	1	5505	16	0.00290645	618	2	0.400022	1	581	0	0	80	0	1	1	898	3	0.00334076	120	0	1	1	4413	12	0.00271924	582	1	0.544441	1	1
AT1G25350.1	1039	414	0.39846	115	53	3.00096e-07	2.14091e-06	1721	4	0.00232423	179	1	0.88847	1	6414	15	0.00233863	702	0	1	1	926	3	0.00323974	115	0	1	1	1382	5	0.00361795	182	0	1	1	5295	12	0.00226629	713	0	1	1	1
AT1G25360.1	1265	310	0.245059	177	60	0.00258304	0.0113581	1334	5	0.00374813	181	3	0.37881	1	4015	10	0.00249066	579	0	1	1	1183	2	0.00169062	172	0	1	1	1240	2	0.0016129	184	0	1	1	3939	6	0.00152323	622	0	1	1	1
AT1G25380.1	565	194	0.343363	59	25	0.00172325	0.00778943	864	3	0.00347222	88	1	0.659844	1	3324	10	0.00300842	338	1	0.529258	1	472	0	0	60	0	1	1	780	1	0.00128205	89	0	1	1	2858	2	0.00069979	345	0	1	1	1
AT1G25390.1	825	144	0.174545	98	30	0.0927186	0.316252	1372	5	0.00364431	149	1	0.838919	1	4809	13	0.00270326	539	0	1	1	561	0	0	92	0	1	1	882	1	0.00113379	136	1	0.589774	1	3048	5	0.00164042	493	0	1	1	1
AT1G25490.1	733	198	0.270123	90	33	0.00595855	0.0249396	1299	7	0.00538876	148	2	0.539376	1	4593	17	0.00370128	543	3	0.122293	1	682	1	0.00146628	93	0	1	1	1028	2	0.00194553	146	0	1	1	3896	6	0.00154004	546	0	1	1	1
AT1G25500.1	386	113	0.292746	45	19	0.00617898	0.0258014	699	0	0	84	0	1	1	2203	6	0.00272356	285	0	1	1	277	1	0.00361011	45	0	1	1	477	0	0	82	0	1	1	1616	2	0.00123762	272	0	1	1	1
AT1G25540.1	821	353	0.429963	97	59	2.40918e-14	3.41967e-13	2320	13	0.00560345	268	4	0.41206	1	6260	25	0.00399361	730	3	0.22313	1	617	0	0	92	0	1	1	1756	8	0.00455581	267	0	1	1	4636	11	0.00237274	734	0	1	1	1
AT1G25580.1	517	229	0.44294	76	43	1.85365e-09	1.67561e-08	863	2	0.0023175	114	0	1	1	2919	6	0.0020555	393	0	1	1	655	1	0.00152672	76	0	1	1	865	2	0.00231214	113	0	1	1	3070	9	0.0029316	397	1	0.415098	1	1
AT1G25682.1	297	117	0.393939	38	22	1.01013e-05	6.05286e-05	677	3	0.00443131	80	1	0.624809	1	2306	5	0.00216826	262	0	1	1	243	1	0.00411523	38	0	1	1	524	1	0.0019084	78	0	1	1	1825	6	0.00328767	261	0	1	1	1
AT1G26110.1	607	234	0.385502	87	45	3.34043e-08	2.62976e-07	1034	4	0.00386847	160	4	0.132599	1	3615	12	0.0033195	549	1	0.705887	1	602	1	0.00166113	93	1	0.999497	1	996	0	0	149	0	1	1	3101	3	0.00096743	510	0	1	1	1
AT1G26130.1	1420	758	0.533803	168	109	0	0	3004	16	0.00532623	323	2	0.904834	1	8834	23	0.00260358	996	1	0.891414	1	1289	1	0.000775795	171	0	1	1	2521	2	0.000793336	327	0	1	1	7404	20	0.00270124	987	1	0.736407	1	1
AT1G26150.1	810	379	0.467901	117	55	7.94644e-08	5.96897e-07	1366	2	0.00146413	182	0	1	1	4437	15	0.00338066	673	1	0.776915	1	804	2	0.00248756	108	0	1	1	1265	3	0.00237154	169	0	1	1	3464	8	0.00230947	540	0	1	1	1
AT1G26170.1	1419	643	0.453136	143	79	2.44249e-15	3.76059e-14	2766	6	0.0021692	268	0	1	1	9689	32	0.00330271	927	1	0.873359	1	1078	3	0.00278293	138	0	1	1	2008	7	0.00348606	265	0	1	1	7178	16	0.00222903	926	0	1	1	1
AT1G26270.1	616	176	0.285714	80	28	0.0207632	0.0798372	1194	3	0.00251256	150	1	0.84088	1	3800	13	0.00342105	546	0	1	1	524	3	0.00572519	81	0	1	1	927	1	0.00107875	142	0	1	1	3098	5	0.00161394	510	0	1	1	1
AT1G26330.1	1208	348	0.288079	125	48	0.000326224	0.00161667	3173	13	0.00409707	330	3	0.766482	1	9691	27	0.00278609	1040	0	1	1	1028	2	0.00194553	121	0	1	1	2585	8	0.00309478	314	0	1	1	7684	23	0.00299323	957	1	0.725505	1	1
AT1G26370.1	866	338	0.3903	103	50	8.51956e-08	6.37453e-07	1615	7	0.00433437	187	1	0.898885	1	5459	7	0.00128229	627	0	1	1	640	2	0.003125	95	0	1	1	1233	4	0.00324412	180	0	1	1	4076	7	0.00171737	588	0	1	1	1
AT1G26520.1	632	238	0.376582	71	32	0.00010611	0.000560211	845	10	0.0118343	99	4	0.0333083	0.823543	2430	5	0.00205761	309	0	1	1	442	0	0	66	0	1	1	674	3	0.00445104	88	0	1	1	2010	7	0.00348259	286	0	1	1	1
AT1G26620.1	834	261	0.31295	109	45	6.97391e-05	0.000377578	1603	9	0.00561447	200	4	0.228068	1	6175	22	0.00356275	809	0	1	1	746	1	0.00134048	103	0	1	1	1368	4	0.00292398	187	0	1	1	5265	12	0.0022792	753	0	1	1	1
AT1G26640.1	552	177	0.320652	61	24	0.00658287	0.0273381	883	1	0.0011325	88	0	1	1	2924	1	0.000341997	313	0	1	1	494	0	0	59	0	1	1	671	3	0.00447094	88	0	1	1	2261	4	0.00176913	304	0	1	1	1
AT1G26850.1	872	196	0.224771	110	33	0.101914	0.343417	1134	4	0.00352734	147	0	1	1	4361	13	0.00298097	568	0	1	1	720	0	0	106	0	1	1	972	1	0.00102881	142	0	1	1	4006	6	0.00149775	560	0	1	1	1
AT1G26940.1	384	101	0.263021	46	21	0.00127476	0.00585369	491	1	0.00203666	49	1	0.451433	1	1915	2	0.00104439	217	0	1	1	382	0	0	46	0	1	1	428	1	0.00233645	49	0	1	1	1706	1	0.000586166	217	0	1	1	1
AT1G27190.1	1073	174	0.162162	130	42	0.023921	0.0910673	1193	3	0.00251467	128	0	1	1	3358	15	0.00446694	435	1	0.620792	1	1069	3	0.00280636	137	0	1	1	974	3	0.00308008	132	0	1	1	2531	4	0.0015804	414	0	1	1	1
AT1G27320.1	1188	533	0.448653	155	86	1.11022e-16	1.90152e-15	2013	6	0.00298063	252	1	0.954407	1	7903	29	0.00366949	974	3	0.368946	1	1079	3	0.00278035	144	1	0.999992	1	1731	5	0.0028885	237	0	1	1	6246	7	0.00112072	904	0	1	1	1
AT1G27340.1	406	178	0.438424	65	30	0.000101243	0.000536642	731	2	0.00273598	118	1	0.764483	1	2063	8	0.00387785	357	0	1	1	411	9	0.0218978	71	2	0.978634	1	731	3	0.00410397	126	1	0.561997	1	2064	3	0.00145349	397	0	1	1	1
AT1G27360.1	488	126	0.258197	66	25	0.00978238	0.0396274	981	7	0.00713558	128	2	0.462827	1	2695	11	0.00408163	354	0	1	1	413	0	0	62	0	1	1	736	1	0.0013587	114	0	1	1	1914	2	0.00104493	311	0	1	1	1
AT1G27370.1	519	201	0.387283	68	33	1.27725e-05	7.52566e-05	920	4	0.00434783	116	0	1	1	2744	7	0.00255102	349	0	1	1	444	1	0.00225225	64	0	1	1	801	1	0.00124844	115	0	1	1	2224	8	0.00359712	335	1	0.363999	1	1
AT1G27420.1	667	223	0.334333	95	32	0.0250003	0.0947177	738	1	0.00135501	103	0	1	1	1878	2	0.00106496	278	0	1	1	561	1	0.00178253	91	0	1	1	622	3	0.00482315	98	0	1	1	1513	3	0.00198282	256	0	1	1	1
AT1G27440.1	606	246	0.405941	75	42	4.34538e-09	3.76425e-08	760	5	0.00657895	94	2	0.317674	1	2445	7	0.00286299	337	0	1	1	473	2	0.00422833	80	0	1	1	718	2	0.00278552	107	0	1	1	2160	5	0.00231481	357	0	1	1	1
AT1G27500.1	844	392	0.464455	108	71	0	0	1119	3	0.00268097	145	2	0.528384	1	4539	10	0.00220313	549	1	0.705887	1	768	0	0	106	0	1	1	936	4	0.0042735	137	0	1	1	3479	9	0.00258695	509	0	1	1	1
AT1G27520.1	797	329	0.412798	87	47	2.65161e-09	2.3418e-08	1290	2	0.00155039	134	1	0.806414	1	5110	13	0.00254403	538	0	1	1	601	1	0.00166389	81	0	1	1	1046	1	0.000956023	128	0	1	1	4027	7	0.00173827	509	0	1	1	1
AT1G27595.1	1631	791	0.484979	197	109	0	0	3629	12	0.0033067	404	3	0.870058	1	10284	20	0.00194477	1171	0	1	1	1492	5	0.00335121	191	0	1	1	2914	8	0.00274537	393	0	1	1	8307	25	0.00300951	1118	1	0.77916	1	1
AT1G27630.1	402	127	0.31592	49	21	0.0033142	0.0143964	748	3	0.0040107	95	1	0.687806	1	2406	5	0.00207814	297	0	1	1	356	1	0.00280899	48	0	1	1	685	3	0.00437956	90	0	1	1	2094	7	0.00334288	287	0	1	1	1
AT1G27680.1	768	190	0.247396	82	31	0.00450088	0.0191017	1156	2	0.0017301	120	0	1	1	4939	10	0.0020247	498	1	0.670476	1	613	0	0	76	0	1	1	1012	3	0.00296443	118	1	0.538427	1	3998	10	0.00250125	482	0	1	1	1
AT1G27750.1	1147	581	0.506539	140	86	0	0	2280	6	0.00263158	269	2	0.840204	1	6515	16	0.00245587	825	0	1	1	1063	1	0.000940734	158	0	1	1	1878	4	0.00212993	292	0	1	1	5669	10	0.00176398	931	0	1	1	1
AT1G27752.1	1068	308	0.28839	121	39	0.029727	0.111221	1964	5	0.00254582	217	1	0.92999	1	6043	13	0.00215125	679	2	0.446337	1	811	3	0.00369914	112	0	1	1	1447	1	0.000691085	201	0	1	1	4725	9	0.00190476	641	0	1	1	1
AT1G27840.1	609	207	0.339901	83	31	0.00553632	0.0232677	1052	2	0.00190114	131	0	1	1	3126	7	0.00223928	391	0	1	1	427	2	0.00468384	74	0	1	1	726	0	0	120	0	1	1	2037	6	0.00294551	354	0	1	1	1
AT1G27850.1	1157	588	0.508211	147	94	0	0	2538	10	0.00394011	291	3	0.688959	1	7981	19	0.00238065	960	0	1	1	1048	1	0.000954198	150	0	1	1	2173	12	0.00552232	295	0	1	1	6730	21	0.00312036	959	0	1	1	1
AT1G27880.1	1674	480	0.286738	178	64	0.000338779	0.00167491	2234	3	0.00134288	233	0	1	1	6934	14	0.00201904	721	0	1	1	1168	4	0.00342466	163	0	1	1	1613	6	0.00371978	213	0	1	1	4812	7	0.0014547	658	0	1	1	1
AT1G27900.1	1526	389	0.254915	148	52	0.00204438	0.00912499	2070	4	0.00193237	188	0	1	1	6234	15	0.00240616	588	0	1	1	1092	6	0.00549451	148	0	1	1	1453	10	0.00688231	188	0	1	1	4327	24	0.00554657	588	0	1	1	1
AT1G27910.1	756	224	0.296296	98	36	0.00406631	0.0173741	1705	4	0.00234604	215	2	0.738065	1	5087	16	0.00314527	669	0	1	1	736	5	0.00679348	100	0	1	1	1559	4	0.00256575	208	0	1	1	4346	10	0.00230097	635	0	1	1	1
AT1G27920.1	699	265	0.379113	77	36	1.51123e-05	8.84244e-05	1356	4	0.00294985	139	0	1	1	4623	15	0.00324465	486	0	1	1	581	0	0	79	0	1	1	1041	3	0.00288184	140	0	1	1	3469	8	0.00230614	479	0	1	1	1
AT1G27960.1	631	230	0.364501	73	40	2.3172e-08	1.85372e-07	1195	3	0.00251046	132	1	0.801611	1	4191	11	0.00262467	478	1	0.655452	1	515	2	0.0038835	72	2	0.980072	1	950	0	0	136	0	1	1	3188	4	0.00125471	482	0	1	1	1
AT1G28090.1	1086	546	0.502762	108	68	0	0	1179	11	0.00932994	121	2	0.434308	1	4403	15	0.00340677	448	2	0.263334	1	791	0	0	105	0	1	1	905	1	0.00110497	120	0	1	1	3193	6	0.00187911	447	0	1	1	1
AT1G28100.1	306	220	0.718954	38	32	1.22125e-14	1.78034e-13	626	3	0.00479233	71	0	1	1	2509	3	0.0011957	279	0	1	1	280	0	0	38	0	1	1	513	3	0.00584795	69	0	1	1	1949	5	0.00256542	274	0	1	1	1
AT1G28120.1	510	211	0.413725	50	24	0.000232735	0.00117274	882	2	0.00226757	81	0	1	1	2550	9	0.00352941	263	1	0.443596	1	400	0	0	50	0	1	1	671	2	0.00298063	79	0	1	1	1837	4	0.00217746	251	0	1	1	1
AT1G28210.1	724	346	0.477901	75	46	1.09106e-11	1.2026e-10	1248	6	0.00480769	121	1	0.772984	1	3508	9	0.00256556	352	0	1	1	677	0	0	77	0	1	1	1032	3	0.00290698	120	0	1	1	3177	11	0.00346239	352	0	1	1	1
AT1G28340.1	697	240	0.344333	80	39	1.87924e-06	1.23088e-05	1280	3	0.00234375	137	1	0.813402	1	5022	17	0.00338511	560	2	0.35436	1	749	0	0	86	0	1	1	1159	2	0.00172563	146	0	1	1	4649	13	0.0027963	585	1	0.546284	1	1
AT1G28410.1	314	120	0.382166	35	18	0.00048348	0.00234016	732	3	0.00409836	79	1	0.620183	1	2488	2	0.000803859	255	0	1	1	265	0	0	35	0	1	1	579	3	0.00518135	76	0	1	1	1818	5	0.00275028	246	0	1	1	1
AT1G28420.1	2311	1287	0.556902	265	169	0	0	3628	8	0.00220507	396	1	0.992192	1	12497	40	0.00320077	1453	2	0.833667	1	2123	3	0.00141309	265	0	1	1	2958	6	0.0020284	389	0	1	1	10461	14	0.0013383	1383	0	1	1	1
AT1G28520.1	497	157	0.315895	66	27	0.00214113	0.00954261	1215	5	0.00411523	154	1	0.848492	1	3532	15	0.00424689	468	0	1	1	390	0	0	60	0	1	1	1048	2	0.0019084	149	0	1	1	2750	5	0.00181818	430	0	1	1	1
AT1G28530.1	875	244	0.278857	89	29	0.0480652	0.173423	1694	3	0.00177096	168	0	1	1	4732	7	0.00147929	468	0	1	1	722	1	0.00138504	91	0	1	1	1445	4	0.00276817	175	0	1	1	4051	8	0.00197482	497	0	1	1	1
AT1G28690.1	911	169	0.18551	104	33	0.0523705	0.187687	749	4	0.00534045	91	0	1	1	3704	6	0.00161987	455	0	1	1	840	12	0.0142857	103	2	0.997828	1	723	0	0	90	0	1	1	3293	6	0.00182205	447	0	1	1	1
AT1G29030.1	805	268	0.332919	89	41	6.33207e-06	3.89693e-05	1407	4	0.00284293	143	0	1	1	4541	8	0.00176173	466	0	1	1	639	3	0.00469484	90	1	0.999357	1	1086	4	0.00368324	146	0	1	1	3663	10	0.00273	480	1	0.477138	1	1
AT1G29120.1	857	240	0.280047	97	35	0.00631511	0.0262997	1296	3	0.00231481	140	2	0.509673	1	3618	9	0.00248756	400	1	0.590022	1	622	1	0.00160772	80	0	1	1	895	3	0.00335196	127	0	1	1	2375	3	0.00126316	355	0	1	1	1
AT1G29150.1	430	238	0.553488	69	51	0	0	641	2	0.00312012	106	1	0.727175	1	1970	9	0.00456853	319	0	1	1	504	0	0	78	0	1	1	720	2	0.00277778	115	0	1	1	2299	6	0.00260983	366	0	1	1	1
AT1G29170.1	1247	338	0.271051	128	47	0.00116296	0.00535929	2342	6	0.00256191	241	2	0.792806	1	8209	20	0.00243635	875	0	1	1	1087	12	0.0110396	133	2	0.999764	1	1868	2	0.00107066	249	0	1	1	6334	16	0.00252605	902	1	0.704333	1	1
AT1G29340.1	1612	398	0.246898	197	78	1.49358e-06	9.90853e-06	1184	5	0.00422297	154	2	0.560819	1	4064	18	0.00442913	511	1	0.679888	1	1381	3	0.00217234	189	0	1	1	970	2	0.00206186	144	1	0.610722	1	2809	8	0.00284799	460	0	1	1	1
AT1G29400.1	1053	353	0.335233	122	48	0.000167144	0.000860573	1612	4	0.00248139	179	0	1	1	6959	15	0.00215548	753	1	0.813352	1	960	11	0.0114583	121	3	0.996734	1	1326	5	0.00377074	178	0	1	1	5839	15	0.00256893	751	2	0.269339	1	1
AT1G29700.1	333	165	0.495495	37	24	2.06208e-07	1.49038e-06	648	0	0	74	0	1	1	3082	12	0.00389358	304	0	1	1	317	0	0	44	0	1	1	551	2	0.00362976	79	1	0.404047	1	2292	3	0.0013089	319	0	1	1	1
AT1G29750.1	1581	957	0.605313	176	124	0	0	2095	7	0.00334129	222	0	1	1	8061	20	0.00248108	836	0	1	1	1308	3	0.00229358	174	0	1	1	1692	5	0.00295508	223	0	1	1	5942	12	0.00201952	827	0	1	1	1
AT1G29770.1	484	264	0.545455	66	42	1.50546e-11	1.64538e-10	533	1	0.00187617	64	0	1	1	1607	6	0.00373367	211	0	1	1	485	3	0.00618557	65	0	1	1	443	1	0.00225734	64	0	1	1	1537	5	0.00325309	221	0	1	1	1
AT1G29800.1	637	262	0.411303	76	43	1.85365e-09	1.67561e-08	1055	1	0.000947867	138	0	1	1	3908	13	0.00332651	482	1	0.658511	1	428	1	0.00233645	63	0	1	1	809	3	0.00370828	111	0	1	1	2444	4	0.00163666	375	0	1	1	1
AT1G29820.1	599	277	0.462437	79	47	3.024e-11	3.215e-10	873	0	0	102	0	1	1	3730	9	0.00241287	470	0	1	1	460	15	0.0326087	71	5	0.662694	1	620	2	0.00322581	87	0	1	1	2714	8	0.00294768	421	0	1	1	1
AT1G29840.1	453	84	0.18543	45	17	0.0306952	0.114549	679	3	0.00441826	60	0	1	1	2829	6	0.00212089	271	0	1	1	277	13	0.0469314	45	2	0.877545	1	388	0	0	58	0	1	1	1649	6	0.00363857	262	0	1	1	1
AT1G29880.1	1087	224	0.206072	142	40	0.164418	0.530068	1447	7	0.0048376	185	2	0.660017	1	5042	14	0.00277668	637	0	1	1	870	0	0	140	0	1	1	1104	2	0.00181159	182	0	1	1	3986	13	0.00326141	625	0	1	1	1
AT1G29900.1	1413	609	0.430998	195	107	0	0	2081	11	0.00528592	279	4	0.441739	1	7625	18	0.00236066	1043	1	0.902215	1	1232	1	0.000811688	178	0	1	1	1525	3	0.00196721	237	0	1	1	5560	17	0.00305755	906	1	0.705926	1	1
AT1G29950.1	260	127	0.488462	33	21	1.90644e-06	1.24767e-05	440	1	0.00227273	56	0	1	1	1749	3	0.00171527	220	0	1	1	238	0	0	32	0	1	1	408	1	0.00245098	55	1	0.302568	1	1422	2	0.00140647	211	0	1	1	1
AT1G30090.1	439	164	0.373576	81	50	9.88543e-13	1.20501e-11	407	13	0.031941	70	10	1.46343e-08	6.14985e-07	933	10	0.0107181	197	0	1	1	573	0	0	97	0	1	1	452	2	0.00442478	80	0	1	1	1178	4	0.00339559	240	0	1	1	1
AT1G30240.1	949	492	0.51844	108	70	0	0	1804	5	0.00277162	199	3	0.437136	1	6801	27	0.00397	760	0	1	1	881	1	0.00113507	106	0	1	1	1604	7	0.00436409	196	0	1	1	5749	15	0.00260915	727	0	1	1	1
AT1G30290.1	1297	330	0.254433	135	47	0.0039672	0.0169915	1434	9	0.00627615	160	3	0.309346	1	6225	14	0.002249	725	0	1	1	850	1	0.00117647	116	0	1	1	1017	0	0	138	0	1	1	3878	7	0.00180505	590	0	1	1	1
AT1G30330.1	1030	638	0.619417	153	122	0	0	1717	8	0.00465929	244	6	0.0798641	1	4990	19	0.00380762	705	0	1	1	1183	2	0.00169062	179	0	1	1	1772	3	0.001693	268	0	1	1	5087	19	0.00373501	762	0	1	1	1
AT1G30360.1	1239	317	0.255851	142	54	0.000193254	0.000987276	1646	2	0.00121507	196	0	1	1	5276	15	0.00284306	603	0	1	1	1062	2	0.00188324	144	0	1	1	1519	4	0.00263331	206	0	1	1	4257	12	0.00281889	606	0	1	1	1
AT1G30400.1	2327	664	0.285346	259	99	4.64076e-07	3.25226e-06	3766	15	0.00398301	415	0	1	1	13276	32	0.00241036	1451	2	0.833099	1	1802	4	0.00221976	248	1	1	1	2934	5	0.00170416	410	1	0.931864	1	9925	20	0.00201511	1414	0	1	1	1
AT1G30440.1	877	523	0.596351	120	87	0	0	1285	8	0.00622568	161	4	0.134751	1	4876	12	0.00246103	608	0	1	1	781	8	0.0102433	110	2	0.998699	1	1051	2	0.00190295	155	0	1	1	3833	8	0.00208714	545	0	1	1	1
AT1G30450.1	1330	737	0.554135	155	92	0	0	2214	6	0.00271003	243	2	0.796567	1	7786	24	0.00308246	874	2	0.579498	1	1217	1	0.000821693	168	0	1	1	1845	3	0.00162602	250	0	1	1	6300	7	0.00111111	872	0	1	1	1
AT1G30460.1	906	215	0.237307	119	38	0.0362402	0.133374	1358	3	0.00220913	163	1	0.864313	1	3947	5	0.00126678	468	0	1	1	779	2	0.00256739	112	0	1	1	1071	3	0.00280112	155	0	1	1	3157	5	0.00158378	475	0	1	1	1
AT1G30470.1	1034	498	0.481625	105	58	1.15921e-11	1.27712e-10	2096	5	0.0023855	211	3	0.474849	1	7543	15	0.0019886	725	0	1	1	791	2	0.00252845	104	0	1	1	1537	3	0.00195185	204	0	1	1	5471	10	0.00182782	700	0	1	1	1
AT1G30490.1	1603	453	0.282595	178	70	6.54744e-06	4.02431e-05	2284	11	0.00481611	254	3	0.598887	1	6661	19	0.00285242	775	1	0.822285	1	1259	15	0.0119142	170	2	0.999986	1	1755	3	0.0017094	245	0	1	1	4838	8	0.00165358	727	0	1	1	1
AT1G30510.1	513	150	0.292398	68	35	1.25366e-06	8.36546e-06	731	0	0	81	0	1	1	2888	10	0.0034626	348	1	0.539635	1	540	3	0.00555556	72	1	0.997203	1	665	0	0	84	0	1	1	2441	2	0.000819336	340	0	1	1	1
AT1G30570.1	951	310	0.325973	121	54	8.29716e-07	5.62891e-06	1568	6	0.00382653	192	1	0.904894	1	5295	7	0.001322	700	0	1	1	839	1	0.0011919	133	0	1	1	1247	1	0.000801925	197	0	1	1	4327	9	0.00207996	724	0	1	1	1
AT1G30590.1	829	302	0.364294	88	38	7.92667e-05	0.000424896	1337	6	0.00448766	134	0	1	1	5322	12	0.00225479	551	0	1	1	729	2	0.00274348	88	0	1	1	1126	2	0.0017762	134	0	1	1	4505	11	0.00244173	551	0	1	1	1
AT1G30600.1	1211	383	0.316268	161	78	2.84686e-11	3.0354e-10	1906	6	0.00314795	237	1	0.945207	1	5676	10	0.0017618	707	1	0.793198	1	1155	13	0.0112554	164	2	0.999977	1	1596	1	0.000626566	232	0	1	1	4637	8	0.00172525	712	0	1	1	1
AT1G30640.1	811	291	0.358816	78	36	2.15158e-05	0.000123883	1584	3	0.00189394	144	1	0.828741	1	5304	17	0.00320513	513	0	1	1	597	1	0.00167504	77	0	1	1	1053	3	0.002849	144	1	0.610722	1	3695	5	0.00135318	505	0	1	1	1
AT1G30680.1	1015	425	0.418719	123	72	6.66134e-16	1.07133e-14	1327	3	0.00226074	147	1	0.834922	1	5665	18	0.00317741	644	0	1	1	864	6	0.00694444	116	1	0.999923	1	1146	3	0.0026178	139	0	1	1	4554	8	0.0017567	597	0	1	1	1
AT1G30690.1	456	236	0.517544	67	45	1.58984e-13	2.0875e-12	1206	13	0.0107794	143	2	0.520958	1	2771	15	0.00541321	414	2	0.235483	1	446	1	0.00224215	60	0	1	1	1099	2	0.00181984	136	0	1	1	2889	5	0.0017307	382	0	1	1	1
AT1G30755.1	972	280	0.288066	110	38	0.0101925	0.0411223	1167	5	0.00428449	124	1	0.781178	1	4974	17	0.00341777	557	0	1	1	875	15	0.0171429	114	2	0.999031	1	1017	1	0.000983284	125	0	1	1	4426	7	0.00158156	568	0	1	1	1
AT1G30810.1	1045	562	0.537799	139	97	0	0	1409	4	0.00283889	178	1	0.887095	1	5760	19	0.00329861	687	0	1	1	990	10	0.010101	137	3	0.998891	1	1282	3	0.00234009	171	0	1	1	4908	6	0.00122249	679	0	1	1	1
AT1G30820.1	1031	292	0.28322	104	47	2.6946e-06	1.73277e-05	1434	3	0.00209205	140	0	1	1	5607	13	0.00231853	560	1	0.713011	1	747	0	0	104	0	1	1	1041	2	0.00192123	140	0	1	1	4171	11	0.00263726	554	0	1	1	1
AT1G30825.1	753	269	0.357238	76	39	3.50587e-07	2.47901e-06	669	1	0.00149477	64	0	1	1	3032	7	0.00230871	275	0	1	1	579	1	0.00172712	75	0	1	1	468	1	0.00213675	63	0	1	1	2071	6	0.00289715	276	0	1	1	1
AT1G30890.1	271	134	0.494465	33	19	4.52326e-05	0.000249828	468	0	0	58	0	1	1	1831	4	0.0021846	231	0	1	1	294	0	0	37	0	1	1	492	0	0	62	0	1	1	1856	4	0.00215517	246	0	1	1	1
AT1G30910.1	626	138	0.220447	70	22	0.107655	0.361265	699	2	0.00286123	83	0	1	1	2186	3	0.00137237	280	0	1	1	429	0	0	64	0	1	1	498	3	0.0060241	77	0	1	1	1694	2	0.00118064	272	0	1	1	1
AT1G31010.1	705	183	0.259574	76	24	0.0918977	0.313652	751	2	0.00266312	78	0	1	1	2820	3	0.00106383	310	0	1	1	566	2	0.00353357	75	0	1	1	530	1	0.00188679	76	0	1	1	2345	4	0.00170576	306	0	1	1	1
AT1G31120.1	926	480	0.518359	141	82	0	0	884	2	0.00226244	138	1	0.815674	1	3973	9	0.00226529	587	0	1	1	973	11	0.0113052	153	2	0.999947	1	907	1	0.00110254	137	0	1	1	3713	5	0.00134662	565	0	1	1	1
AT1G31220.1	385	156	0.405195	54	23	0.00238823	0.0105567	455	4	0.00879121	55	1	0.490319	1	1686	4	0.00237248	211	0	1	1	441	4	0.00907029	54	2	0.931965	1	439	1	0.0022779	54	0	1	1	1651	1	0.000605694	206	0	1	1	1
AT1G31230.1	1329	382	0.287434	151	57	0.000164588	0.000848048	2610	9	0.00344828	270	0	1	1	7096	21	0.00295941	784	1	0.825815	1	1138	2	0.00175747	151	0	1	1	2106	8	0.00379867	269	0	1	1	5870	12	0.00204429	776	0	1	1	1
AT1G31280.1	1491	382	0.256204	214	76	0.000159182	0.000820812	1600	5	0.003125	209	1	0.922779	1	5807	19	0.00327191	834	1	0.844186	1	1223	8	0.00654129	211	2	0.999999	1	1258	5	0.00397456	213	0	1	1	4713	7	0.00148525	807	0	1	1	1
AT1G31300.1	495	177	0.357576	56	29	8.56085e-06	5.18873e-05	549	1	0.00182149	60	0	1	1	2200	4	0.00181818	234	0	1	1	372	0	0	50	0	1	1	449	1	0.00222717	54	0	1	1	1691	6	0.0035482	202	0	1	1	1
AT1G31360.1	978	382	0.390593	107	59	8.55427e-12	9.58953e-11	1792	4	0.00223214	180	0	1	1	6001	11	0.00183303	623	0	1	1	814	5	0.00614251	107	1	0.99984	1	1348	2	0.00148368	181	0	1	1	4483	8	0.00178452	608	0	1	1	1
AT1G31420.1	834	466	0.558753	94	63	0	0	1216	4	0.00328947	127	1	0.789076	1	4994	9	0.00180216	526	1	0.690415	1	621	9	0.0144928	92	1	0.999454	1	900	4	0.00444444	120	0	1	1	3518	23	0.00653781	510	1	0.497904	1	1
AT1G31440.1	674	230	0.341246	76	32	0.000483398	0.00234016	984	3	0.00304878	101	1	0.709936	1	3787	8	0.00211249	412	0	1	1	544	0	0	72	0	1	1	777	4	0.00514801	98	0	1	1	3009	9	0.00299103	404	0	1	1	1
AT1G31470.1	1140	320	0.280702	156	64	3.09658e-06	1.96675e-05	1100	5	0.00454545	149	0	1	1	3385	10	0.00295421	458	0	1	1	1036	6	0.00579151	137	1	0.999986	1	995	2	0.00201005	132	0	1	1	2706	8	0.00295639	377	0	1	1	1
AT1G31480.1	1503	695	0.462409	155	82	1.9762e-14	2.82766e-13	2352	8	0.00340136	227	1	0.938064	1	8458	15	0.00177347	852	0	1	1	1285	4	0.00311284	153	0	1	1	1887	6	0.00317965	226	0	1	1	6652	10	0.00150331	833	0	1	1	1
AT1G31490.1	709	387	0.545839	106	75	0	0	701	2	0.00285307	105	1	0.723811	1	2464	6	0.00243506	361	1	0.552785	1	800	21	0.02625	110	4	0.97655	1	745	2	0.00268456	105	0	1	1	2349	4	0.00170285	352	0	1	1	1
AT1G31500.1	693	234	0.337662	66	30	0.000142642	0.000740539	1118	1	0.000894454	105	0	1	1	3263	4	0.00122587	320	0	1	1	561	1	0.00178253	66	0	1	1	897	2	0.00222965	103	0	1	1	2389	5	0.00209293	322	0	1	1	1
AT1G31730.1	1577	330	0.209258	183	61	0.00368982	0.0158615	1771	6	0.00338792	209	4	0.251578	1	6378	26	0.00407651	791	2	0.525799	1	1379	2	0.00145033	185	0	1	1	1430	1	0.000699301	195	0	1	1	5285	18	0.00340587	763	0	1	1	1
AT1G31750.1	297	97	0.326599	50	20	0.0101689	0.0410478	174	7	0.0402299	31	4	0.000532257	0.0171433	703	5	0.00711238	132	1	0.254906	1	213	86	0.403756	44	17	1.38721e-08	1.46589e-07	119	3	0.0252101	25	0	1	1	415	0	0	88	0	1	1	1
AT1G31780.1	1261	308	0.244251	171	51	0.0579118	0.205885	1364	4	0.00293255	181	2	0.648305	1	4347	8	0.00184035	563	0	1	1	1243	3	0.00241352	155	0	1	1	1376	0	0	165	0	1	1	4019	11	0.002737	504	0	1	1	1
AT1G31810.1	1163	693	0.595873	140	105	0	0	2043	9	0.00440529	228	4	0.302612	1	7513	22	0.00292826	861	1	0.853287	1	1016	6	0.00590551	150	1	0.999995	1	1755	4	0.0022792	237	0	1	1	6478	19	0.002933	862	0	1	1	1
AT1G31817.1	587	135	0.229983	73	26	0.0201042	0.0775955	633	2	0.00315956	74	1	0.596184	1	1846	1	0.000541712	242	0	1	1	570	0	0	67	0	1	1	649	1	0.00154083	75	0	1	1	1832	6	0.00327511	233	0	1	1	1
AT1G31830.1	518	149	0.287645	83	33	0.00131741	0.00602647	726	0	0	119	0	1	1	2547	3	0.00117786	424	0	1	1	436	0	0	74	0	1	1	600	1	0.00166667	108	0	1	1	2228	5	0.00224417	388	0	1	1	1
AT1G31860.1	604	176	0.291391	50	18	0.0430673	0.156603	583	1	0.00171527	50	0	1	1	2950	13	0.00440678	259	1	0.438613	1	421	5	0.0118765	49	1	0.981707	1	428	1	0.00233645	49	0	1	1	2098	5	0.00238322	252	0	1	1	1
AT1G31870.1	925	389	0.420541	110	62	6.90115e-13	8.51834e-12	1085	1	0.000921659	120	1	0.770185	1	4217	9	0.00213422	471	1	0.650034	1	724	1	0.00138122	110	0	1	1	821	2	0.00243605	125	0	1	1	3077	6	0.00194995	476	0	1	1	1
AT1G31910.1	547	218	0.398537	60	28	0.000134463	0.000701261	1399	5	0.00357398	146	1	0.832887	1	4329	17	0.003927	466	0	1	1	429	1	0.002331	59	0	1	1	1002	3	0.00299401	139	0	1	1	3245	4	0.00123267	459	0	1	1	1
AT1G31930.1	1350	715	0.52963	170	110	0	0	1622	5	0.00308261	189	2	0.671414	1	4734	9	0.00190114	603	0	1	1	1307	5	0.00382555	178	1	1	1	1398	3	0.00214592	196	0	1	1	4168	7	0.00167946	616	0	1	1	1
AT1G32090.1	1317	431	0.327259	142	58	1.02167e-05	6.1128e-05	1630	7	0.00429448	177	0	1	1	5840	25	0.00428082	679	0	1	1	1006	2	0.00198807	143	0	1	1	1214	1	0.000823723	176	0	1	1	4498	11	0.00244553	675	0	1	1	1
AT1G32130.1	742	317	0.427224	76	41	2.82375e-08	2.23954e-07	1040	3	0.00288462	103	1	0.716959	1	3893	12	0.00308246	432	1	0.618248	1	578	1	0.0017301	71	0	1	1	767	0	0	95	0	1	1	2835	3	0.0010582	386	0	1	1	1
AT1G32150.1	552	185	0.335145	59	25	0.00172325	0.00778943	1155	7	0.00606061	118	1	0.764483	1	3464	7	0.00202079	361	0	1	1	406	3	0.00738916	57	0	1	1	770	1	0.0012987	112	0	1	1	2568	5	0.00194704	343	0	1	1	1
AT1G32160.1	623	287	0.460674	93	58	8.10463e-15	1.20157e-13	808	4	0.0049505	108	3	0.145458	1	2305	3	0.00130152	324	0	1	1	706	1	0.00141643	94	0	1	1	843	1	0.00118624	109	0	1	1	2564	5	0.00195008	345	0	1	1	1
AT1G32230.1	745	414	0.555705	99	75	0	0	1209	13	0.0107527	154	4	0.119989	1	4109	16	0.00389389	539	2	0.337512	1	683	1	0.00146413	96	0	1	1	1021	3	0.0029383	144	0	1	1	3339	4	0.00119796	513	0	1	1	1
AT1G32260.1	405	167	0.412346	63	41	9.00924e-12	1.00084e-10	355	1	0.0028169	55	0	1	1	979	5	0.00510725	157	1	0.295293	1	331	8	0.0241692	51	3	0.77364	1	312	1	0.00320513	50	0	1	1	907	4	0.00441014	141	0	1	1	1
AT1G32330.1	762	281	0.368766	96	50	4.37736e-09	3.78375e-08	1069	0	0	135	0	1	1	3003	12	0.003996	384	1	0.575136	1	672	0	0	94	0	1	1	926	2	0.00215983	130	0	1	1	2677	8	0.00298842	386	0	1	1	1
AT1G32415.1	1389	498	0.358531	163	87	1.55431e-15	2.44247e-14	1244	4	0.00321543	147	0	1	1	4868	15	0.00308135	626	2	0.406204	1	1114	27	0.024237	164	4	0.99915	1	985	2	0.00203046	152	0	1	1	3689	6	0.00162646	630	0	1	1	1
AT1G32440.1	1052	449	0.426806	107	57	1.1896e-10	1.20113e-09	1117	15	0.0134288	113	7	0.000498518	0.0160782	5117	16	0.00312683	521	1	0.686945	1	859	17	0.0197905	107	2	0.998379	1	931	1	0.00107411	111	0	1	1	4099	3	0.000731886	517	0	1	1	1
AT1G32450.1	868	236	0.271889	118	56	4.03315e-08	3.14519e-07	798	2	0.00250627	118	0	1	1	3873	12	0.00309837	544	0	1	1	928	18	0.0193966	128	4	0.991883	1	814	2	0.002457	122	0	1	1	3920	11	0.00280612	578	0	1	1	1
AT1G32520.1	403	133	0.330025	54	38	1.27942e-12	1.54312e-11	207	1	0.00483092	31	0	1	1	1999	10	0.0050025	224	0	1	1	458	1	0.00218341	54	0	1	1	263	0	0	31	0	1	1	1814	4	0.00220507	224	0	1	1	1
AT1G32530.1	891	338	0.379349	105	56	1.62288e-10	1.6095e-09	1166	4	0.00343053	138	0	1	1	4391	13	0.0029606	572	0	1	1	751	2	0.00266312	99	0	1	1	941	3	0.0031881	129	0	1	1	3562	10	0.00280741	540	0	1	1	1
AT1G32730.1	854	280	0.327869	70	25	0.0215765	0.0828174	1055	2	0.00189573	87	0	1	1	2996	13	0.00433912	253	1	0.431054	1	612	0	0	65	0	1	1	717	1	0.0013947	75	0	1	1	1885	5	0.00265252	219	0	1	1	1
AT1G32750.1	1744	882	0.505734	229	138	0	0	3791	10	0.00263783	460	3	0.919025	1	11926	26	0.00218011	1497	1	0.964457	1	1610	3	0.00186335	231	0	1	1	3103	8	0.00257815	462	0	1	1	9901	16	0.001616	1504	0	1	1	1
AT1G32810.2	1075	633	0.588837	152	106	0	0	1786	6	0.00335946	244	2	0.798424	1	5733	22	0.00383743	819	2	0.544425	1	1117	3	0.00268577	148	0	1	1	1751	4	0.00228441	252	0	1	1	5245	12	0.00228789	788	0	1	1	1
AT1G32900.1	794	201	0.253149	82	31	0.00450088	0.0191017	1601	4	0.00249844	162	0	1	1	5798	14	0.00241463	591	0	1	1	540	1	0.00185185	74	0	1	1	1175	0	0	157	0	1	1	4253	5	0.00117564	577	0	1	1	1
AT1G32940.1	783	457	0.583653	122	89	0	0	1322	4	0.00302572	197	2	0.693274	1	4586	11	0.0023986	646	1	0.763076	1	835	2	0.00239521	143	1	0.999992	1	1347	4	0.00296956	210	0	1	1	4475	12	0.00268156	699	1	0.611043	1	1
AT1G33050.1	714	279	0.390756	99	44	9.36794e-06	5.64511e-05	1209	3	0.00248139	150	1	0.84088	1	4868	6	0.00123254	595	0	1	1	716	0	0	98	0	1	1	981	2	0.00203874	149	1	0.623268	1	3874	6	0.00154879	588	0	1	1	1
AT1G33410.1	2036	748	0.367387	225	95	2.75408e-09	2.42738e-08	3701	8	0.00216158	371	1	0.989393	1	12328	30	0.00243348	1262	0	1	1	1803	3	0.00166389	235	0	1	1	2952	6	0.00203252	375	0	1	1	10000	25	0.0025	1288	0	1	1	1
AT1G33480.1	421	116	0.275534	49	27	3.73954e-06	2.35178e-05	545	3	0.00550459	65	3	0.0451749	1	1671	9	0.005386	202	0	1	1	359	1	0.00278552	56	0	1	1	493	3	0.00608519	72	0	1	1	1592	2	0.00125628	226	0	1	1	1
AT1G33680.1	844	220	0.260664	104	42	0.000213021	0.00107827	1650	7	0.00424242	224	2	0.758287	1	4298	7	0.00162866	606	0	1	1	777	1	0.001287	113	0	1	1	1474	2	0.00135685	225	1	0.771029	1	3819	10	0.00261849	620	0	1	1	1
AT1G33700.1	1366	442	0.323572	162	79	1.41035e-11	1.54389e-10	1854	8	0.00431499	203	1	0.916888	1	7320	20	0.00273224	773	1	0.821491	1	1435	2	0.00139373	184	0	1	1	1823	7	0.00383982	215	0	1	1	6727	14	0.00208117	814	0	1	1	1
AT1G33980.1	870	303	0.348276	88	51	1.76537e-11	1.91765e-10	1219	6	0.00492207	133	0	1	1	3695	9	0.00243572	423	0	1	1	644	1	0.0015528	81	0	1	1	1048	1	0.000954198	132	0	1	1	3126	6	0.00191939	400	0	1	1	1
AT1G34020.1	621	192	0.309179	71	33	3.90814e-05	0.000217658	976	0	0	104	0	1	1	2536	8	0.00315457	262	1	0.442354	1	478	0	0	69	0	1	1	752	0	0	100	0	1	1	1892	3	0.00158562	255	0	1	1	1
AT1G34065.1	508	209	0.411417	48	28	5.14089e-07	3.58547e-06	1087	3	0.00275989	91	1	0.672122	1	3608	10	0.00277162	315	0	1	1	330	0	0	47	0	1	1	702	1	0.0014245	91	0	1	1	2255	7	0.00310421	303	0	1	1	1
AT1G34130.1	1163	246	0.211522	156	47	0.0570453	0.203302	1321	2	0.001514	176	1	0.884294	1	4520	12	0.00265487	585	1	0.728567	1	1093	2	0.00182983	159	0	1	1	1186	6	0.00505902	173	0	1	1	3760	6	0.00159574	564	0	1	1	1
AT1G34210.1	813	401	0.493235	106	64	3.33067e-15	5.08566e-14	1416	0	0	180	0	1	1	4118	8	0.00194269	545	0	1	1	698	6	0.00859599	104	0	1	1	1324	3	0.00226586	176	0	1	1	3782	9	0.00237969	535	0	1	1	1
AT1G34220.1	845	257	0.304142	94	42	1.25984e-05	7.43772e-05	1825	6	0.00328767	218	3	0.496301	1	4494	16	0.0035603	503	0	1	1	638	1	0.0015674	93	0	1	1	1326	3	0.00226244	210	0	1	1	3113	3	0.000963701	470	0	1	1	1
AT1G34260.1	1804	990	0.54878	226	149	0	0	2981	6	0.00201275	349	2	0.926346	1	9677	26	0.00268678	1220	0	1	1	1796	73	0.0406459	240	10	0.992208	1	2761	13	0.00470844	350	1	0.899051	1	9138	31	0.00339243	1220	0	1	1	1
AT1G34320.1	798	428	0.536341	95	59	6.21725e-15	9.33872e-14	1363	4	0.0029347	150	2	0.546604	1	5489	17	0.0030971	620	0	1	1	648	1	0.00154321	91	0	1	1	922	14	0.0151844	141	3	0.0657247	1	3932	12	0.00305188	587	0	1	1	1
AT1G34360.1	601	281	0.467554	88	45	5.22417e-08	4.00821e-07	890	3	0.00337079	116	1	0.75864	1	3073	11	0.00357956	421	0	1	1	557	21	0.037702	80	5	0.761094	1	726	3	0.00413223	109	0	1	1	2779	7	0.00251889	403	0	1	1	1
AT1G34420.1	1094	324	0.296161	139	51	0.000755064	0.00356165	2219	3	0.00135196	276	0	1	1	6506	15	0.00230556	814	0	1	1	840	3	0.00357143	132	2	0.999745	1	1734	3	0.0017301	263	0	1	1	5078	10	0.00196928	781	1	0.651829	1	1
AT1G34760.1	530	174	0.328302	56	30	2.41152e-06	1.55595e-05	436	3	0.00688073	44	0	1	1	2105	9	0.00427553	222	0	1	1	456	0	0	58	0	1	1	368	0	0	45	0	1	1	1686	3	0.00177936	231	0	1	1	1
AT1G34780.1	581	214	0.36833	73	35	9.91636e-06	5.94647e-05	478	0	0	58	0	1	1	2190	3	0.00136986	280	0	1	1	562	1	0.00177936	74	0	1	1	447	1	0.00223714	58	0	1	1	2261	3	0.00132685	281	0	1	1	1
AT1G35220.1	967	627	0.648397	137	106	0	0	1803	9	0.00499168	248	5	0.187164	1	6611	15	0.00226895	844	1	0.847621	1	1136	4	0.00352113	145	0	1	1	1868	1	0.000535332	253	0	1	1	6780	13	0.0019174	872	0	1	1	1
AT1G35470.1	811	213	0.262639	84	29	0.0228092	0.0872568	887	3	0.00338219	93	1	0.68006	1	3611	6	0.00166159	387	1	0.577967	1	684	3	0.00438596	90	2	0.994432	1	716	3	0.00418994	93	0	1	1	3058	4	0.00130804	387	0	1	1	1
AT1G35580.1	835	357	0.427545	119	66	3.57048e-13	4.54511e-12	903	1	0.00110742	116	0	1	1	3334	7	0.00209958	421	0	1	1	870	0	0	130	0	1	1	855	2	0.00233918	128	0	1	1	3248	6	0.00184729	490	0	1	1	1
AT1G35660.1	1864	735	0.394313	239	119	0	0	2970	6	0.0020202	356	2	0.931301	1	9265	25	0.00269833	1148	1	0.922621	1	1814	7	0.00385888	233	1	1	1	2704	9	0.0033284	350	1	0.899051	1	8433	18	0.00213447	1125	0	1	1	1
AT1G36280.1	667	219	0.328336	71	32	0.00010611	0.000560211	865	2	0.00231214	91	2	0.304251	1	4657	12	0.00257677	488	0	1	1	516	0	0	72	0	1	1	701	4	0.00570613	91	0	1	1	3472	10	0.00288018	479	0	1	1	1
AT1G36320.1	543	267	0.491713	63	38	1.31896e-09	1.20914e-08	923	2	0.00216685	98	0	1	1	3173	9	0.00283643	364	1	0.555765	1	584	1	0.00171233	63	0	1	1	823	3	0.0036452	95	0	1	1	2633	5	0.00189897	353	0	1	1	1
AT1G36990.1	348	191	0.548851	54	35	3.51248e-10	3.3754e-09	1058	5	0.0047259	160	1	0.859232	1	3654	7	0.00191571	553	0	1	1	332	0	0	49	0	1	1	966	2	0.00207039	145	1	0.613264	1	3520	10	0.00284091	489	0	1	1	1
AT1G42440.1	1120	483	0.43125	118	67	5.15143e-14	7.08374e-13	1882	5	0.00265675	197	0	1	1	6523	18	0.00275947	731	0	1	1	938	449	0.478678	117	62	0	0	1582	6	0.00379267	197	0	1	1	5386	9	0.001671	716	0	1	1	1
AT1G42540.1	1574	408	0.259212	214	98	6.34848e-12	7.20992e-11	1392	7	0.00502874	188	5	0.0813324	1	5278	28	0.00530504	727	0	1	1	1455	514	0.353265	206	96	0	0	1249	17	0.0136109	173	4	0.0275207	0.930447	4537	10	0.0022041	658	0	1	1	1
AT1G43190.1	637	226	0.354788	66	29	0.000372613	0.00183012	1342	4	0.00298063	122	0	1	1	3902	5	0.00128139	379	0	1	1	493	139	0.281947	67	22	3.90911e-09	4.24682e-08	948	1	0.00105485	124	0	1	1	2725	5	0.00183486	374	0	1	1	1
AT1G43580.1	923	283	0.306609	90	40	2.33252e-05	0.000133389	1045	8	0.0076555	105	0	1	1	3597	10	0.00278009	377	0	1	1	587	209	0.356048	90	39	0	0	667	0	0	104	0	1	1	2239	5	0.00223314	377	0	1	1	1
AT1G43620.1	756	577	0.763228	98	86	0	0	1378	12	0.00870827	164	4	0.141294	1	4757	14	0.00294303	581	0	1	1	711	507	0.71308	98	76	0	0	1156	5	0.00432526	165	0	1	1	4164	7	0.00168108	584	0	1	1	1
AT1G43850.1	943	487	0.516437	121	80	0	0	2156	5	0.00231911	282	1	0.968433	1	5496	16	0.00291121	724	0	1	1	843	482	0.571767	119	73	0	0	1896	2	0.00105485	268	0	1	1	4660	11	0.00236052	694	0	1	1	1
AT1G43860.1	592	204	0.344595	74	32	0.000271634	0.00135806	705	1	0.00141844	87	0	1	1	2318	10	0.00431406	296	0	1	1	468	201	0.429487	70	32	0	0	542	2	0.00369004	81	0	1	1	1821	3	0.00164745	278	0	1	1	1
AT1G43890.1	461	207	0.449024	49	26	1.40452e-05	8.23408e-05	452	2	0.00442478	47	0	1	1	1657	9	0.0054315	178	0	1	1	327	140	0.428135	48	25	1.11022e-15	1.66968e-14	321	0	0	45	0	1	1	1202	3	0.00249584	171	0	1	1	1
AT1G44120.1	2869	1493	0.52039	398	233	0	0	3645	24	0.00658436	463	8	0.206917	1	13611	54	0.00396738	1736	5	0.344868	1	2696	1384	0.513353	382	216	0	0	3181	19	0.00597296	443	2	0.785278	1	11763	36	0.00306044	1675	0	1	1	1
AT1G44170.1	1143	486	0.425197	131	69	2.86082e-12	3.33967e-11	942	5	0.00530786	117	0	1	1	3199	9	0.00281338	397	0	1	1	872	403	0.462156	117	70	0	0	763	5	0.00655308	106	1	0.500672	1	2665	4	0.00150094	368	0	1	1	1
AT1G44446.1	886	342	0.386005	94	52	1.21757e-10	1.22835e-09	1001	3	0.002997	104	2	0.361894	1	4580	19	0.00414847	498	0	1	1	747	336	0.449799	94	51	0	0	813	1	0.00123001	104	0	1	1	3705	13	0.00350877	498	0	1	1	1
AT1G44750.1	518	213	0.411197	78	41	7.44455e-08	5.62101e-07	607	2	0.00329489	84	0	1	1	2515	9	0.00357853	327	0	1	1	529	195	0.36862	77	39	0	0	591	0	0	82	0	1	1	2200	4	0.00181818	304	0	1	1	1
AT1G44780.1	631	266	0.421553	71	34	1.36442e-05	8.01661e-05	993	0	0	97	0	1	1	3846	5	0.00130005	411	0	1	1	635	222	0.349606	69	29	8.88178e-15	1.28966e-13	824	1	0.00121359	94	0	1	1	3101	5	0.00161238	401	0	1	1	1
AT1G44900.1	1546	384	0.248383	166	57	0.00235117	0.0103995	2242	5	0.00223015	236	1	0.944532	1	7061	16	0.00226597	755	0	1	1	1442	373	0.258669	170	56	0	0	2054	7	0.00340798	243	0	1	1	6201	13	0.00209644	776	0	1	1	1
AT1G44910.1	1233	695	0.563666	136	95	0	0	2468	11	0.00445705	282	5	0.261604	1	6521	28	0.00429382	764	5	0.0295253	0.883937	1053	677	0.642925	136	96	0	0	1877	4	0.00213106	274	0	1	1	5049	8	0.00158447	747	0	1	1	1
AT1G44960.1	367	131	0.356948	50	24	0.000232735	0.00117274	632	8	0.0126582	85	3	0.0857642	1	1429	11	0.00769769	206	1	0.368211	1	324	99	0.305556	49	18	1.33779e-08	1.41554e-07	443	3	0.00677201	70	0	1	1	1170	3	0.0025641	173	0	1	1	1
AT1G45000.1	741	176	0.237517	91	32	0.0131773	0.0522076	708	1	0.00141243	88	0	1	1	2910	9	0.00309278	361	0	1	1	762	221	0.290026	94	28	4.08267e-10	4.6858e-09	709	0	0	89	0	1	1	3168	7	0.0022096	369	0	1	1	1
AT1G45130.1	980	330	0.336735	113	61	1.29032e-11	1.41605e-10	1766	5	0.00283126	173	1	0.879961	1	6486	14	0.0021585	675	1	0.777907	1	816	360	0.441176	114	58	0	0	1235	5	0.00404858	176	0	1	1	4712	10	0.00212224	677	0	1	1	1
AT1G45150.1	844	438	0.518957	91	58	1.9984e-15	3.09572e-14	1643	10	0.00608643	160	2	0.581538	1	5728	9	0.00157123	591	0	1	1	702	428	0.609687	89	61	0	0	1184	11	0.00929054	156	1	0.640156	1	4386	11	0.00250798	581	0	1	1	1
AT1G45160.1	1304	815	0.625	156	113	0	0	2202	11	0.00499546	245	4	0.349138	1	7844	20	0.00254972	895	0	1	1	1222	750	0.613748	153	105	0	0	2017	5	0.00247893	248	0	1	1	6904	13	0.00188297	879	0	1	1	1
AT1G45180.1	650	410	0.630769	90	66	0	0	1233	2	0.00162206	168	2	0.608026	1	4293	7	0.00163056	582	1	0.726746	1	539	369	0.684601	82	61	0	0	1008	2	0.00198413	155	0	1	1	3312	8	0.00241546	530	0	1	1	1
AT1G45231.2	563	237	0.420959	64	32	7.82016e-06	4.75541e-05	796	3	0.00376884	89	1	0.663987	1	4685	12	0.00256137	525	0	1	1	500	186	0.372	63	29	4.44089e-16	6.77646e-15	741	0	0	90	0	1	1	4075	7	0.00171779	526	0	1	1	1
AT1G45249.1	285	96	0.336842	47	22	0.000647796	0.00308416	735	1	0.00136054	120	0	1	1	2319	8	0.00344976	386	0	1	1	339	109	0.321534	45	17	2.06556e-08	2.14957e-07	766	4	0.00522193	100	1	0.480652	1	2366	5	0.00211327	360	0	1	1	1
AT1G45545.1	1158	629	0.543178	137	96	0	0	1256	7	0.00557325	140	1	0.820137	1	5861	11	0.00187681	665	1	0.772901	1	921	566	0.614549	119	79	0	0	972	6	0.00617284	127	0	1	1	3970	11	0.00277078	568	0	1	1	1
AT1G45976.1	622	143	0.229904	62	23	0.0168298	0.0656862	738	3	0.00406504	72	0	1	1	2672	8	0.00299401	275	0	1	1	542	112	0.206642	64	20	5.05849e-08	5.14373e-07	642	1	0.00155763	70	0	1	1	2076	7	0.00337187	268	0	1	1	1
AT1G47056.1	902	264	0.292683	129	44	0.00781242	0.0321108	767	1	0.00130378	102	1	0.713469	1	2537	8	0.00315333	350	1	0.541683	1	974	205	0.210472	140	33	9.0204e-09	9.63603e-08	775	1	0.00129032	116	0	1	1	2267	2	0.000882223	377	0	1	1	1
AT1G47240.1	703	243	0.345661	97	42	3.17956e-05	0.000178635	967	2	0.00206825	120	0	1	1	3461	13	0.00375614	426	0	1	1	532	266	0.5	89	47	0	0	666	5	0.00750751	113	2	0.168788	1	2474	3	0.00121261	408	0	1	1	1
AT1G47330.1	847	275	0.324675	91	39	7.85423e-05	0.000422097	1138	4	0.00351494	116	2	0.413444	1	4426	19	0.00429282	472	0	1	1	644	273	0.423913	87	39	0	0	855	5	0.00584795	113	1	0.523056	1	3393	6	0.00176835	453	0	1	1	1
AT1G47380.1	558	222	0.397849	67	33	8.57124e-06	5.19254e-05	1062	2	0.00188324	115	1	0.755664	1	3331	13	0.00390273	390	1	0.58078	1	478	218	0.456067	69	35	0	0	781	4	0.00512164	116	1	0.532339	1	2597	11	0.00423566	390	0	1	1	1
AT1G47550.1	990	412	0.416162	142	65	2.04913e-08	1.64944e-07	1462	2	0.00136799	193	0	1	1	5211	13	0.00249472	676	0	1	1	694	279	0.402017	113	48	0	0	991	2	0.00201816	163	0	1	1	3694	11	0.0029778	579	0	1	1	1
AT1G47570.1	866	329	0.379908	83	38	1.61998e-05	9.45334e-05	1733	5	0.00288517	148	0	1	1	4390	10	0.0022779	390	0	1	1	608	283	0.465461	85	44	0	0	1091	3	0.00274977	147	0	1	1	2818	7	0.00248403	390	0	1	1	1
AT1G47640.1	275	101	0.367273	43	19	0.00337715	0.014617	526	3	0.00570342	68	2	0.200986	1	1461	1	0.000684463	205	0	1	1	268	84	0.313433	42	18	7.00363e-10	7.95076e-09	409	13	0.0317848	63	3	0.00826151	0.304881	1184	4	0.00337838	195	0	1	1	1
AT1G47710.1	658	244	0.370821	83	40	2.01948e-06	1.3152e-05	777	0	0	89	0	1	1	2159	6	0.00277906	261	1	0.44111	1	763	209	0.273919	94	30	1.42651e-11	1.7575e-10	764	0	0	98	0	1	1	2006	3	0.00149551	291	0	1	1	1
AT1G47900.1	1058	488	0.461248	118	67	5.15143e-14	7.08374e-13	2772	18	0.00649351	273	4	0.4256	1	8355	23	0.00275284	873	1	0.85716	1	868	508	0.585253	107	66	0	0	2169	2	0.000922084	260	0	1	1	6112	17	0.00278141	791	2	0.2892	1	1
AT1G48040.1	609	204	0.334975	77	41	4.61806e-08	3.56368e-07	753	4	0.00531208	101	2	0.348729	1	2155	1	0.000464037	313	0	1	1	533	172	0.322702	75	30	1.53211e-14	2.202e-13	621	0	0	97	0	1	1	1770	4	0.00225989	293	0	1	1	1
AT1G48050.1	1001	318	0.317682	99	44	9.36794e-06	5.64511e-05	1403	2	0.00142552	144	0	1	1	5579	6	0.00107546	579	0	1	1	850	304	0.357647	107	45	0	0	1124	4	0.00355872	146	0	1	1	4456	13	0.00291741	590	0	1	1	1
AT1G48090.1	4848	3046	0.6283	556	410	0	0	10027	41	0.00408896	1089	11	0.771842	1	33169	81	0.00244204	3651	4	0.961331	1	4193	2927	0.698068	548	414	0	0	8257	39	0.00472327	1077	5	0.830912	1	27078	70	0.00258512	3598	1	0.992254	1	1
AT1G48110.1	756	414	0.547619	88	55	3.4639e-14	4.80728e-13	1695	9	0.00530973	183	1	0.893805	1	5094	13	0.00255202	561	0	1	1	588	331	0.562925	86	52	0	0	1314	1	0.000761035	178	0	1	1	3855	7	0.00181582	531	1	0.511948	1	1
AT1G48120.1	1323	653	0.493575	157	98	0	0	3381	21	0.00621118	378	3	0.839448	1	9934	20	0.00201329	1162	0	1	1	1072	611	0.569963	149	98	0	0	2841	19	0.00668779	369	3	0.433178	1	8334	24	0.00287977	1134	0	1	1	1
AT1G48210.1	429	99	0.230769	52	17	0.1082	0.362818	838	1	0.00119332	101	1	0.709936	1	2682	8	0.00298285	329	0	1	1	346	127	0.367052	54	23	3.60956e-12	4.58603e-11	687	1	0.0014556	105	0	1	1	2063	8	0.00387785	326	0	1	1	1
AT1G48310.1	857	318	0.371062	86	40	6.10941e-06	3.76666e-05	2140	7	0.00327103	188	1	0.900117	1	6958	19	0.00273067	603	1	0.739242	1	613	260	0.424144	85	37	0	0	1402	5	0.00356633	180	1	0.692514	1	4552	15	0.00329525	577	0	1	1	1
AT1G48370.1	578	130	0.224913	79	28	0.0174576	0.0678993	1287	3	0.002331	162	1	0.86264	1	5148	16	0.003108	665	1	0.772901	1	445	154	0.346067	72	34	0	0	998	3	0.00300601	153	0	1	1	3988	6	0.00150451	615	0	1	1	1
AT1G48410.1	1335	743	0.556554	155	102	0	0	2543	4	0.00157295	299	0	1	1	8096	21	0.00259387	980	1	0.887471	1	1005	544	0.541294	149	85	0	0	1947	3	0.00154083	290	0	1	1	6312	12	0.00190114	942	1	0.719886	1	1
AT1G48430.1	822	303	0.368613	107	54	4.69101e-09	4.04539e-08	1955	5	0.00255754	224	2	0.758287	1	4306	15	0.00348351	515	1	0.68273	1	721	286	0.396671	102	51	0	0	1636	16	0.00977995	218	3	0.171778	1	3674	17	0.00462711	501	0	1	1	1
AT1G48490.1	1773	854	0.481669	244	143	0	0	2396	2	0.000834725	308	1	0.977045	1	8631	16	0.00185378	1084	0	1	1	1658	881	0.531363	250	146	0	0	1985	7	0.00352645	298	1	0.858073	1	7009	15	0.00214011	1041	1	0.754951	1	1
AT1G48520.1	493	246	0.498986	62	35	6.28875e-08	4.79433e-07	1223	6	0.00490597	138	1	0.815674	1	4128	9	0.00218023	475	0	1	1	440	222	0.504545	63	36	0	0	1051	2	0.00190295	138	0	1	1	3554	11	0.0030951	475	1	0.473594	1	1
AT1G48540.1	1381	379	0.274439	159	52	0.0103236	0.041644	2469	4	0.00162009	247	0	1	1	8397	13	0.00154817	891	0	1	1	1039	325	0.312801	139	45	0	0	1733	3	0.0017311	228	0	1	1	5976	15	0.00251004	813	0	1	1	1
AT1G48560.1	1004	272	0.270916	123	39	0.038057	0.139473	1283	5	0.00389712	149	0	1	1	4430	18	0.00406321	538	2	0.336706	1	776	209	0.26933	117	35	2.48712e-12	3.18016e-11	1052	2	0.00190114	144	0	1	1	3416	7	0.00204918	500	0	1	1	1
AT1G48580.1	658	185	0.281155	83	33	0.00131741	0.00602647	1098	1	0.000910747	110	0	1	1	3817	7	0.0018339	404	0	1	1	538	195	0.362454	72	32	0	0	816	1	0.00122549	108	0	1	1	2799	3	0.00107181	371	0	1	1	1
AT1G48760.1	1214	335	0.275947	147	55	0.000275117	0.00137361	1565	2	0.00127796	189	1	0.901333	1	5284	11	0.00208176	703	0	1	1	953	369	0.387198	135	56	0	0	1335	2	0.00149813	182	0	1	1	5002	8	0.00159936	703	0	1	1	1
AT1G48780.1	391	166	0.424552	53	26	8.19755e-05	0.000438681	428	1	0.00233645	57	1	0.502658	1	1346	5	0.00371471	181	1	0.332003	1	389	170	0.437018	55	30	0	0	427	2	0.00468384	57	0	1	1	1403	1	0.000712758	208	0	1	1	1
AT1G48790.1	936	435	0.464744	103	57	1.57041e-11	1.71324e-10	1169	8	0.00684346	130	2	0.470819	1	3825	6	0.00156863	429	0	1	1	711	364	0.511955	103	56	0	0	876	2	0.00228311	122	0	1	1	2946	11	0.00373388	405	0	1	1	1
AT1G48840.1	1279	487	0.380766	135	67	1.81228e-10	1.78994e-09	1828	6	0.00328228	176	0	1	1	5906	17	0.00287843	588	2	0.376578	1	1002	495	0.494012	135	74	0	0	1307	2	0.00153022	170	0	1	1	4172	11	0.00263663	562	0	1	1	1
AT1G48850.1	849	297	0.349823	83	33	0.00131741	0.00602647	1194	2	0.00167504	109	1	0.737022	1	4013	5	0.00124595	387	0	1	1	562	222	0.395018	70	31	2.22045e-16	3.43854e-15	821	1	0.00121803	107	0	1	1	2677	6	0.00224131	338	0	1	1	1
AT1G48880.1	747	172	0.230254	85	27	0.0727925	0.253818	824	4	0.00485437	85	0	1	1	3561	22	0.00617804	399	3	0.0607643	1	519	151	0.290944	79	25	8.4282e-10	9.54314e-09	543	0	0	79	0	1	1	2264	7	0.00309187	378	0	1	1	1
AT1G48970.1	996	345	0.346386	154	57	0.000298374	0.00148772	1143	5	0.00437445	169	3	0.33919	1	3925	23	0.00585987	546	2	0.343144	1	939	308	0.328009	158	59	0	0	1032	2	0.00193798	170	0	1	1	3336	11	0.00329736	513	0	1	1	1
AT1G49160.1	1399	249	0.177984	127	37	0.123095	0.407803	1098	3	0.00273224	99	1	0.702739	1	4422	11	0.00248756	421	0	1	1	950	209	0.22	122	37	3.75699e-13	5.03469e-12	752	4	0.00531915	95	0	1	1	2742	6	0.00218818	371	0	1	1	1
AT1G49300.1	417	219	0.52518	43	29	2.85833e-09	2.51373e-08	597	5	0.00837521	61	2	0.170293	1	1670	6	0.00359281	181	0	1	1	303	146	0.481848	40	23	8.88178e-16	1.33911e-14	484	0	0	61	0	1	1	1363	1	0.000733676	172	0	1	1	1
AT1G49340.1	2794	1160	0.415175	339	174	0	0	5433	21	0.00386527	633	6	0.782365	1	14365	34	0.00236686	1697	1	0.977242	1	2247	1042	0.463729	336	161	0	0	4189	11	0.00262593	617	0	1	1	11431	30	0.00262444	1685	0	1	1	1
AT1G49540.1	996	481	0.482932	132	87	0	0	1677	6	0.00357782	217	4	0.272876	1	5511	6	0.00108873	691	0	1	1	967	505	0.522234	135	80	0	0	1537	7	0.00455433	208	1	0.744051	1	4740	10	0.0021097	665	0	1	1	1
AT1G49580.1	1063	309	0.290687	107	35	0.0306767	0.114524	1339	1	0.000746826	122	0	1	1	4653	11	0.00236407	420	1	0.607898	1	866	259	0.299076	126	37	1.12299e-12	1.46004e-11	1088	2	0.00183824	136	0	1	1	3790	7	0.00184697	498	0	1	1	1
AT1G49600.1	475	185	0.389474	58	27	0.0001852	0.000948856	1189	4	0.00336417	149	0	1	1	3367	9	0.002673	401	1	0.590935	1	381	171	0.448819	57	25	1.85962e-13	2.51524e-12	906	3	0.00331126	141	0	1	1	2335	2	0.000856531	364	0	1	1	1
AT1G49630.1	1737	836	0.48129	199	107	0	0	2160	2	0.000925926	228	0	1	1	8564	21	0.00245213	953	1	0.88049	1	1380	628	0.455072	194	101	0	0	1619	25	0.0154416	224	5	0.0165134	0.586838	6764	20	0.00295683	948	1	0.722147	1	1
AT1G49670.1	1077	511	0.474466	105	56	1.62288e-10	1.6095e-09	1818	3	0.00165017	168	1	0.872377	1	5795	17	0.00293356	545	0	1	1	920	446	0.484783	105	61	0	0	1473	5	0.00339443	167	0	1	1	4796	11	0.00229358	542	0	1	1	1
AT1G49730.1	1001	375	0.374625	110	53	4.87293e-08	3.74291e-07	1416	3	0.00211864	155	0	1	1	5277	12	0.00227402	562	0	1	1	814	387	0.47543	113	55	0	0	1164	3	0.00257732	156	0	1	1	4275	6	0.00140351	581	0	1	1	1
AT1G49890.1	1058	304	0.287335	140	49	0.0029451	0.0128747	1304	4	0.00306748	164	0	1	1	3508	3	0.000855188	490	0	1	1	770	236	0.306494	133	44	0	0	885	2	0.00225989	146	0	1	1	2642	5	0.00189251	456	0	1	1	1
AT1G49960.1	1099	317	0.288444	117	53	5.89334e-07	4.09598e-06	1568	4	0.00255102	156	1	0.85216	1	4714	9	0.00190921	460	0	1	1	822	254	0.309002	114	46	0	0	1123	2	0.00178094	153	1	0.633013	1	3332	7	0.00210084	449	0	1	1	1
AT1G49980.1	1098	252	0.229508	112	34	0.0856451	0.294722	1546	2	0.00129366	159	0	1	1	5888	15	0.00254755	591	0	1	1	755	206	0.272848	106	35	9.54792e-14	1.30912e-12	1046	1	0.000956023	143	0	1	1	3998	12	0.0030015	558	0	1	1	1
AT1G50000.1	635	189	0.297638	75	30	0.00190787	0.00855866	700	5	0.00714286	79	0	1	1	2177	14	0.00643087	246	1	0.422106	1	604	242	0.400662	77	32	5.55112e-16	8.44104e-15	658	6	0.00911854	81	1	0.411805	1	1938	7	0.00361197	244	0	1	1	1
AT1G50120.1	769	261	0.339402	83	38	1.61998e-05	9.45334e-05	1030	5	0.00485437	114	0	1	1	4382	6	0.00136924	482	0	1	1	587	207	0.352641	80	28	5.41855e-12	6.83014e-11	821	0	0	111	0	1	1	3462	9	0.00259965	472	0	1	1	1
AT1G50140.1	1662	812	0.488568	172	96	0	0	2313	9	0.00389105	234	0	1	1	8832	26	0.00294384	922	0	1	1	1211	693	0.572254	163	102	0	0	1828	5	0.00273523	225	1	0.771029	1	6552	10	0.00152625	858	0	1	1	1
AT1G50200.1	1576	784	0.497462	169	100	0	0	2461	15	0.00609508	257	4	0.382056	1	8764	35	0.00399361	906	1	0.86729	1	1213	757	0.624073	173	109	0	0	1780	22	0.0123596	252	5	0.0258327	0.883247	6027	6	0.00099552	870	0	1	1	1
AT1G50300.1	635	166	0.261417	64	24	0.0128472	0.0509884	1043	3	0.00287632	105	0	1	1	2441	6	0.00245801	292	0	1	1	406	167	0.41133	59	26	5.35127e-14	7.47387e-13	703	1	0.00142248	102	0	1	1	1638	5	0.0030525	279	0	1	1	1
AT1G50360.1	1287	425	0.330225	135	54	4.02567e-05	0.00022384	2616	6	0.00229358	259	1	0.958155	1	8257	37	0.00448105	865	6	0.0139302	0.458206	1202	465	0.386855	147	64	0	0	2076	5	0.00240848	265	0	1	1	6593	15	0.00227514	897	0	1	1	1
AT1G50380.1	910	217	0.238462	100	32	0.0498197	0.179322	1869	7	0.00374532	198	1	0.911636	1	5619	21	0.00373732	597	0	1	1	619	232	0.374798	96	38	0	0	1462	0	0	200	0	1	1	4242	10	0.00235738	607	0	1	1	1
AT1G50410.1	1223	788	0.644317	147	111	0	0	2314	8	0.00345722	257	1	0.957117	1	7296	12	0.00164474	838	1	0.845569	1	975	642	0.658462	142	104	0	0	1729	3	0.00173511	254	0	1	1	5325	13	0.00244131	797	0	1	1	1
AT1G50430.1	643	202	0.314152	72	30	0.00087888	0.00410895	1076	3	0.0027881	104	0	1	1	4506	10	0.00221926	400	0	1	1	564	250	0.443262	72	34	0	0	781	1	0.00128041	103	0	1	1	3096	6	0.00193798	395	0	1	1	1
AT1G50460.1	590	235	0.398305	73	41	5.88409e-09	5.03178e-08	869	3	0.00345224	97	0	1	1	3733	9	0.00241093	434	0	1	1	567	311	0.548501	69	42	0	0	729	2	0.00274348	96	0	1	1	3033	4	0.00131883	426	0	1	1	1
AT1G50480.1	729	330	0.452675	91	54	1.22258e-12	1.47604e-11	1084	3	0.00276753	140	1	0.820137	1	4376	5	0.0011426	562	1	0.714288	1	574	241	0.419861	86	45	0	0	831	2	0.00240674	132	0	1	1	3424	6	0.00175234	538	0	1	1	1
AT1G50510.1	546	204	0.373626	54	28	1.1808e-05	7.04208e-05	1003	1	0.000997009	93	1	0.68006	1	3217	6	0.00186509	303	0	1	1	442	187	0.423077	54	28	0	0	758	0	0	94	0	1	1	2504	5	0.00199681	303	0	1	1	1
AT1G50520.1	429	168	0.391608	63	32	5.09758e-06	3.16807e-05	620	2	0.00322581	89	0	1	1	2303	3	0.00130265	358	0	1	1	293	120	0.409556	51	25	7.43849e-15	1.08271e-13	429	2	0.004662	72	0	1	1	1483	1	0.000674309	274	0	1	1	1
AT1G50600.1	606	170	0.280528	85	38	3.14219e-05	0.00017668	930	1	0.00107527	112	1	0.746514	1	4273	8	0.00187222	555	0	1	1	614	203	0.330619	82	37	0	0	819	2	0.002442	104	0	1	1	3658	9	0.00246036	502	0	1	1	1
AT1G50660.1	1143	376	0.328959	158	74	6.34783e-10	5.96045e-09	1167	3	0.00257069	157	1	0.85396	1	4084	9	0.00220372	593	0	1	1	973	456	0.468654	149	75	0	0	958	2	0.00208768	146	0	1	1	3501	14	0.00399886	557	0	1	1	1
AT1G50670.1	303	184	0.607261	28	20	1.97118e-07	1.42769e-06	584	4	0.00684932	44	1	0.416771	1	2468	7	0.0028363	190	0	1	1	248	153	0.616935	28	20	1.11022e-16	1.74461e-15	404	0	0	44	0	1	1	1645	6	0.00364742	190	0	1	1	1
AT1G50710.1	629	262	0.416534	63	29	0.000139105	0.000723429	1117	2	0.00179051	99	0	1	1	4113	12	0.00291758	385	0	1	1	429	182	0.424242	62	26	2.24376e-13	3.03053e-12	678	1	0.00147493	97	0	1	1	2605	5	0.00191939	379	0	1	1	1
AT1G50730.1	1243	518	0.416734	116	57	6.30815e-09	5.37334e-08	2739	10	0.00365097	234	0	1	1	9031	27	0.0029897	804	1	0.83341	1	796	381	0.478643	114	59	0	0	1843	3	0.00162778	233	0	1	1	5803	15	0.00258487	791	0	1	1	1
AT1G50840.1	1448	829	0.572514	157	113	0	0	2386	6	0.00251467	247	2	0.803907	1	8402	23	0.00273744	923	0	1	1	1154	717	0.621317	150	107	0	0	1806	8	0.00442968	239	0	1	1	6536	22	0.00336597	881	0	1	1	1
AT1G50910.1	786	336	0.427481	78	42	2.06733e-08	1.66298e-07	1330	6	0.00451128	128	0	1	1	4539	6	0.00132188	431	0	1	1	531	208	0.391714	73	33	0	0	954	6	0.00628931	126	0	1	1	2990	4	0.00133779	405	0	1	1	1
AT1G50950.1	846	329	0.388889	76	36	1.0498e-05	6.27484e-05	1308	0	0	107	0	1	1	4774	9	0.00188521	415	0	1	1	624	289	0.463141	76	39	0	0	883	2	0.00226501	107	0	1	1	3485	8	0.00229555	415	0	1	1	1
AT1G51110.1	899	261	0.290323	74	28	0.00662145	0.0274745	1161	4	0.00344531	97	0	1	1	3980	5	0.00125628	334	1	0.525042	1	571	187	0.327496	74	27	4.14824e-12	5.25374e-11	763	3	0.00393185	97	0	1	1	2578	13	0.00504267	334	0	1	1	1
AT1G51200.1	164	122	0.743902	31	25	6.56606e-11	6.7606e-10	268	1	0.00373134	48	0	1	1	647	1	0.0015456	123	0	1	1	177	135	0.762712	34	27	0	0	311	0	0	59	0	1	1	759	1	0.00131752	132	0	1	1	1
AT1G51310.1	751	236	0.314248	99	42	5.6707e-05	0.000309719	805	2	0.00248447	111	1	0.743389	1	3054	4	0.00130976	414	0	1	1	535	183	0.342056	78	29	3.8658e-13	5.1776e-12	562	2	0.00355872	89	0	1	1	2369	9	0.00379907	345	0	1	1	1
AT1G51350.1	1192	308	0.258389	125	45	0.00229352	0.0101746	1611	7	0.00434513	167	2	0.604786	1	5036	12	0.00238284	527	0	1	1	910	318	0.349451	125	49	0	0	1226	2	0.00163132	163	0	1	1	3507	6	0.00171086	497	0	1	1	1
AT1G51405.1	787	190	0.241423	85	33	0.00209897	0.00936428	910	2	0.0021978	89	0	1	1	3344	23	0.00687799	375	1	0.566526	1	742	262	0.3531	86	35	0	0	779	3	0.00385109	86	0	1	1	2558	5	0.00195465	364	0	1	1	1
AT1G51460.1	826	218	0.263923	98	35	0.00756445	0.0311369	1450	7	0.00482759	159	2	0.578135	1	5973	10	0.0016742	648	2	0.423042	1	600	213	0.355	88	39	0	0	1057	0	0	149	0	1	1	4433	4	0.000902323	618	0	1	1	1
AT1G51520.1	629	75	0.119237	61	10	0.949496	1	856	0	0	80	0	1	1	3494	20	0.0057241	375	0	1	1	527	73	0.13852	63	10	0.024195	0.168323	650	0	0	80	0	1	1	2813	3	0.00106648	368	0	1	1	1
AT1G51550.1	718	183	0.254875	85	34	0.000991545	0.00459089	820	4	0.00487805	97	3	0.115421	1	3525	13	0.00368794	430	0	1	1	513	0	0	91	0	1	1	532	1	0.0018797	93	0	1	1	2323	6	0.00258287	414	1	0.428378	1	1
AT1G51570.1	621	129	0.207729	87	27	0.0927542	0.316283	910	6	0.00659341	126	3	0.199153	1	3583	13	0.00362824	536	1	0.697239	1	636	2	0.00314465	106	0	1	1	885	1	0.00112994	135	0	1	1	3375	7	0.00207407	550	0	1	1	1
AT1G51590.1	728	376	0.516484	80	48	1.21851e-11	1.33908e-10	1137	5	0.00439754	119	0	1	1	5181	16	0.00308821	520	0	1	1	672	1	0.0014881	77	0	1	1	956	4	0.0041841	115	0	1	1	4310	13	0.00301624	502	0	1	1	1
AT1G51600.1	315	198	0.628571	40	30	2.17364e-11	2.33211e-10	713	0	0	84	0	1	1	2625	1	0.000380952	287	0	1	1	249	0	0	39	0	1	1	505	0	0	75	0	1	1	1702	1	0.000587544	254	0	1	1	1
AT1G51610.1	812	247	0.304187	78	35	5.76885e-05	0.000314677	1028	2	0.00194553	104	0	1	1	4149	11	0.00265124	416	1	0.604386	1	636	1	0.00157233	76	0	1	1	785	0	0	105	0	1	1	3066	8	0.00260926	409	0	1	1	1
AT1G51620.1	371	181	0.487871	55	37	2.10812e-11	2.27197e-10	364	1	0.00274725	53	0	1	1	1697	2	0.00117855	233	0	1	1	399	1	0.00250627	55	0	1	1	367	2	0.00544959	51	0	1	1	1592	4	0.00251256	215	0	1	1	1
AT1G51630.1	513	159	0.309942	54	25	0.000351717	0.00173423	736	4	0.00543478	84	1	0.642756	1	3454	6	0.00173712	384	0	1	1	424	1	0.00235849	53	0	1	1	650	1	0.00153846	80	0	1	1	2938	3	0.0010211	382	0	1	1	1
AT1G51720.1	749	476	0.635514	79	57	0	0	1417	4	0.00282287	156	1	0.85216	1	5006	13	0.00259688	553	0	1	1	673	2	0.00297177	83	0	1	1	1293	5	0.00386698	162	0	1	1	4254	12	0.00282087	559	0	1	1	1
AT1G51730.1	341	99	0.290323	40	17	0.00865807	0.0353444	639	1	0.00156495	62	0	1	1	2124	4	0.00188324	254	0	1	1	314	1	0.00318471	40	0	1	1	429	1	0.002331	62	0	1	1	1790	2	0.00111732	250	0	1	1	1
AT1G51745.1	815	200	0.245399	91	35	0.00189325	0.00849782	1215	4	0.00329218	138	0	1	1	3896	8	0.00205339	478	0	1	1	689	2	0.00290276	96	0	1	1	1047	2	0.00191022	148	0	1	1	3325	7	0.00210526	470	0	1	1	1
AT1G51965.1	1052	301	0.286122	132	56	3.68245e-06	2.31679e-05	735	6	0.00816327	104	1	0.720406	1	4556	16	0.00351185	573	0	1	1	825	2	0.00242424	120	1	0.999944	1	615	1	0.00162602	90	0	1	1	3285	5	0.00152207	463	0	1	1	1
AT1G51980.1	810	389	0.480247	103	66	0	0	1221	4	0.003276	138	0	1	1	4025	13	0.00322981	459	2	0.272354	1	754	4	0.00530504	108	0	1	1	998	3	0.00300601	139	0	1	1	3422	9	0.00263004	456	0	1	1	1
AT1G52080.1	683	261	0.382138	85	42	4.84053e-07	3.38238e-06	1148	4	0.00348432	136	1	0.811101	1	3708	16	0.00431499	463	1	0.643737	1	698	8	0.0114613	88	2	0.993573	1	1134	1	0.000881834	136	0	1	1	3449	4	0.00115976	461	0	1	1	1
AT1G52150.1	1062	467	0.439736	119	70	1.11022e-15	1.76018e-14	2057	13	0.00631988	221	2	0.751701	1	7287	37	0.00507754	824	1	0.840674	1	799	2	0.00250313	119	0	1	1	1517	6	0.00395517	219	0	1	1	5302	16	0.00301773	797	0	1	1	1
AT1G52310.1	742	240	0.32345	115	56	1.28564e-08	1.05867e-07	852	5	0.00586854	113	1	0.749602	1	3191	7	0.00219367	425	0	1	1	866	1	0.00115473	130	0	1	1	807	3	0.00371747	118	0	1	1	3132	6	0.00191571	481	0	1	1	1
AT1G52320.1	1133	356	0.31421	164	68	9.89454e-07	6.67298e-06	926	6	0.00647948	129	1	0.794183	1	3967	5	0.0012604	551	0	1	1	1003	2	0.00199402	136	0	1	1	824	2	0.00242718	105	0	1	1	3008	10	0.00332447	423	0	1	1	1
AT1G52360.1	864	463	0.53588	103	70	0	0	2029	5	0.00246427	228	1	0.938819	1	7193	27	0.00375365	852	3	0.295466	1	819	0	0	106	0	1	1	1688	5	0.00296209	226	1	0.772524	1	6322	10	0.00158178	854	0	1	1	1
AT1G52420.1	787	415	0.527319	100	71	0	0	1259	6	0.00476569	153	1	0.846624	1	4515	8	0.00177187	605	0	1	1	634	3	0.00473186	94	0	1	1	1062	2	0.00188324	147	0	1	1	3956	7	0.00176946	564	0	1	1	1
AT1G52520.1	1020	353	0.346078	132	66	1.63967e-10	1.62548e-09	1112	9	0.00809353	138	5	0.0275288	0.697537	4159	11	0.00264487	547	2	0.343947	1	1056	3	0.00284091	136	0	1	1	1056	2	0.00189394	138	0	1	1	4011	7	0.0017452	549	0	1	1	1
AT1G52570.1	980	676	0.689796	131	105	0	0	1205	0	0	159	0	1	1	5470	17	0.00310786	731	1	0.803971	1	883	18	0.0203851	127	2	0.99963	1	1040	2	0.00192308	153	0	1	1	4587	9	0.00196207	691	0	1	1	1
AT1G52730.1	547	157	0.28702	59	26	0.000694687	0.00328849	941	3	0.0031881	99	0	1	1	2824	4	0.00141643	307	0	1	1	462	5	0.0108225	57	2	0.944318	1	729	3	0.00411523	94	1	0.45983	1	2272	5	0.0022007	303	0	1	1	1
AT1G52780.1	1972	885	0.448783	255	154	0	0	1690	3	0.00177515	211	2	0.728622	1	6681	18	0.00269421	795	1	0.830034	1	1762	5	0.00283768	262	1	1	1	1443	6	0.004158	218	0	1	1	5707	16	0.00280357	846	0	1	1	1
AT1G52820.1	415	205	0.493976	64	41	1.91479e-11	2.06826e-10	490	3	0.00612245	75	3	0.0639693	1	1759	8	0.00454804	268	0	1	1	415	0	0	61	0	1	1	445	0	0	71	0	1	1	1676	4	0.00238663	260	0	1	1	1
AT1G53025.1	594	288	0.484848	80	51	9.25926e-14	1.24611e-12	874	3	0.00343249	120	0	1	1	3268	14	0.00428397	419	2	0.239572	1	568	9	0.0158451	82	2	0.990141	1	876	2	0.00228311	123	0	1	1	3155	4	0.00126783	446	0	1	1	1
AT1G53040.1	911	319	0.350165	108	48	3.77638e-06	2.37308e-05	703	1	0.00142248	81	0	1	1	4139	18	0.00434888	494	0	1	1	844	3	0.0035545	106	1	0.999826	1	670	2	0.00298507	81	0	1	1	3706	10	0.00269833	478	0	1	1	1
AT1G53050.1	924	460	0.497835	117	70	3.33067e-16	5.49286e-15	1395	7	0.00501792	173	3	0.352434	1	5036	18	0.00357427	648	0	1	1	770	2	0.0025974	109	1	0.999864	1	1178	2	0.00169779	162	0	1	1	3835	10	0.00260756	569	0	1	1	1
AT1G53165.1	975	454	0.465641	98	58	2.14273e-13	2.78601e-12	1677	6	0.00357782	168	0	1	1	6056	15	0.00247688	604	1	0.739823	1	773	0	0	99	0	1	1	1262	2	0.00158479	170	1	0.671694	1	4437	11	0.00247915	600	0	1	1	1
AT1G53190.1	627	406	0.647528	84	66	0	0	954	2	0.00209644	120	0	1	1	3131	4	0.00127755	430	1	0.616542	1	583	0	0	83	0	1	1	836	5	0.00598086	116	0	1	1	2698	0	0	418	0	1	1	1
AT1G53310.1	1582	650	0.410872	208	123	0	0	2006	6	0.00299103	240	3	0.560642	1	6663	14	0.00210116	806	1	0.834151	1	1495	3	0.00200669	209	0	1	1	1663	6	0.00360794	250	1	0.805623	1	5818	9	0.00154692	823	0	1	1	1
AT1G53380.1	853	142	0.166471	111	34	0.077042	0.26736	727	1	0.00137552	99	1	0.702739	1	2774	8	0.00288392	348	0	1	1	879	3	0.00341297	112	0	1	1	772	3	0.00388601	99	0	1	1	2667	4	0.00149981	360	0	1	1	1
AT1G53450.1	795	254	0.319497	77	32	0.000635909	0.00302847	1074	8	0.00744879	105	2	0.366261	1	4038	6	0.00148588	396	0	1	1	539	1	0.00185529	78	0	1	1	735	2	0.00272109	107	1	0.503933	1	2880	9	0.003125	410	0	1	1	1
AT1G53500.1	690	294	0.426087	105	59	2.92855e-12	3.41457e-11	1025	0	0	138	0	1	1	4096	7	0.00170898	589	0	1	1	710	23	0.0323944	100	4	0.958806	1	981	3	0.0030581	128	1	0.567699	1	4252	8	0.00188147	557	0	1	1	1
AT1G53510.1	852	368	0.431925	99	56	7.17171e-12	8.10974e-11	1186	2	0.00168634	144	2	0.524681	1	4308	18	0.00417827	501	0	1	1	663	2	0.00301659	97	0	1	1	1019	0	0	145	0	1	1	3479	5	0.00143719	492	0	1	1	1
AT1G53590.1	1038	307	0.295761	102	42	0.00012801	0.000669426	1791	7	0.00390843	178	1	0.887095	1	6101	22	0.00360597	648	1	0.76413	1	848	2	0.00235849	100	0	1	1	1437	1	0.000695894	174	0	1	1	4966	7	0.00140959	638	1	0.577633	1	1
AT1G53710.1	1010	296	0.293069	106	46	1.28036e-05	7.53845e-05	1154	3	0.00259965	119	1	0.767351	1	4649	2	0.0004302	460	0	1	1	870	1	0.00114943	105	0	1	1	1045	4	0.00382775	120	0	1	1	3770	14	0.00371353	455	1	0.459178	1	1
AT1G53720.1	603	300	0.497512	61	38	3.46633e-10	3.33438e-09	1085	1	0.000921659	118	0	1	1	3592	11	0.00306236	381	0	1	1	583	2	0.00343053	65	0	1	1	936	3	0.00320513	117	0	1	1	3000	3	0.001	396	0	1	1	1
AT1G53730.1	1026	428	0.417154	115	58	1.32998e-09	1.21877e-08	2041	10	0.00489956	206	1	0.919888	1	5718	13	0.00227352	632	1	0.755566	1	899	1	0.00111235	112	0	1	1	1664	1	0.000600962	200	0	1	1	5064	9	0.00177725	610	1	0.561351	1	1
AT1G53800.1	665	242	0.36391	94	44	1.7376e-06	1.14044e-05	945	5	0.00529101	124	0	1	1	3927	18	0.00458365	483	2	0.29201	1	619	0	0	90	0	1	1	893	3	0.00335946	114	0	1	1	3190	8	0.00250784	423	0	1	1	1
AT1G53850.1	352	111	0.315341	37	18	0.00112795	0.00520597	515	0	0	50	0	1	1	2333	4	0.00171453	221	0	1	1	320	0	0	38	0	1	1	469	1	0.0021322	52	0	1	1	2058	3	0.00145773	233	0	1	1	1
AT1G54090.1	1305	196	0.150192	150	45	0.0653354	0.230417	1316	6	0.00455927	147	1	0.834922	1	4092	16	0.00391007	497	1	0.66974	1	1097	2	0.00182315	149	0	1	1	1090	2	0.00183486	147	0	1	1	3596	7	0.00194661	498	0	1	1	1
AT1G54100.1	1112	341	0.306655	103	42	0.000165667	0.000853337	1251	6	0.00479616	117	0	1	1	4765	12	0.00251836	462	1	0.642942	1	819	0	0	98	0	1	1	968	1	0.00103306	112	0	1	1	3786	11	0.00290544	463	0	1	1	1
AT1G54115.1	929	276	0.297094	111	58	2.24626e-10	2.19374e-09	1031	3	0.0029098	115	0	1	1	4601	19	0.00412954	578	1	0.724298	1	763	2	0.00262123	112	1	0.999893	1	777	4	0.00514801	108	0	1	1	3743	6	0.00160299	544	0	1	1	1
AT1G54170.1	716	318	0.444134	70	38	7.19288e-08	5.43612e-07	1847	5	0.00270709	172	0	1	1	5148	14	0.0027195	525	0	1	1	632	2	0.00316456	69	0	1	1	1455	3	0.00206186	167	0	1	1	4079	11	0.00269674	502	0	1	1	1
AT1G54220.1	996	293	0.294177	102	38	0.00242997	0.0107224	1471	5	0.00339905	153	1	0.846624	1	4806	14	0.00291303	493	1	0.666783	1	786	0	0	96	0	1	1	1086	0	0	146	0	1	1	3583	11	0.00307005	480	0	1	1	1
AT1G54380.1	602	146	0.242525	68	27	0.00353775	0.0152351	847	1	0.00118064	89	0	1	1	3642	19	0.00521691	426	1	0.613107	1	674	0	0	70	0	1	1	864	2	0.00231481	94	0	1	1	3762	12	0.00318979	451	1	0.456247	1	1
AT1G54385.1	600	313	0.521667	86	59	0	0	721	1	0.00138696	97	0	1	1	3181	14	0.00440113	442	1	0.626663	1	592	3	0.00506757	94	0	1	1	641	2	0.00312012	96	0	1	1	2775	3	0.00108108	423	0	1	1	1
AT1G54440.1	963	358	0.371755	103	50	8.51956e-08	6.37453e-07	1300	3	0.00230769	129	0	1	1	5890	12	0.00203735	576	0	1	1	749	1	0.00133511	96	1	0.999606	1	1101	1	0.000908265	125	0	1	1	4367	9	0.00206091	547	0	1	1	1
AT1G54460.1	527	159	0.301708	56	23	0.00415934	0.0177574	768	0	0	79	0	1	1	2753	6	0.00217944	293	0	1	1	351	0	0	49	0	1	1	478	4	0.0083682	66	1	0.351063	1	1760	6	0.00340909	245	0	1	1	1
AT1G54490.1	1319	779	0.590599	160	109	0	0	2383	8	0.00335711	264	1	0.960642	1	7518	28	0.00372439	823	1	0.840318	1	1030	0	0	151	0	1	1	1829	7	0.00382723	250	0	1	1	5572	11	0.00197416	770	0	1	1	1
AT1G54570.1	1157	467	0.40363	117	63	6.96776e-12	7.89213e-11	1513	8	0.00528751	161	2	0.58492	1	6343	15	0.00236481	669	0	1	1	860	1	0.00116279	109	0	1	1	1173	1	0.000852515	150	0	1	1	5024	9	0.0017914	642	0	1	1	1
AT1G54610.1	781	434	0.555698	95	59	6.21725e-15	9.33872e-14	1010	0	0	112	0	1	1	4122	12	0.00291121	476	0	1	1	673	5	0.00742942	90	1	0.999357	1	829	1	0.00120627	108	0	1	1	3701	10	0.00270197	491	0	1	1	1
AT1G54710.1	1239	626	0.505246	173	113	0	0	1686	4	0.00237248	253	2	0.814476	1	5442	17	0.00312385	783	0	1	1	1036	6	0.00579151	163	4	0.999094	1	1448	6	0.00414365	235	0	1	1	4286	14	0.00326645	701	0	1	1	1
AT1G55020.1	1633	363	0.22229	174	67	2.26974e-05	0.000130062	1898	4	0.00210748	212	0	1	1	6378	16	0.00250862	746	0	1	1	1225	10	0.00816327	171	2	0.999987	1	1560	4	0.0025641	209	0	1	1	5101	11	0.00215644	728	0	1	1	1
AT1G55040.1	1166	386	0.331046	134	57	2.74342e-06	1.76247e-05	1578	7	0.00443599	176	2	0.633216	1	5143	14	0.00272215	691	0	1	1	874	4	0.00457666	120	1	0.999944	1	1299	5	0.00384911	170	0	1	1	4226	5	0.00118315	618	0	1	1	1
AT1G55090.1	1062	381	0.358757	118	49	2.84848e-05	0.000161452	1982	7	0.00353179	216	2	0.740381	1	5771	23	0.00398544	660	1	0.770356	1	786	0	0	110	0	1	1	1510	9	0.00596026	205	0	1	1	4144	10	0.00241313	615	0	1	1	1
AT1G55130.1	936	298	0.318376	108	49	1.45293e-06	9.65621e-06	1253	7	0.00558659	137	5	0.0267913	0.681729	4509	28	0.0062098	541	1	0.700595	1	842	2	0.0023753	113	1	0.999902	1	973	2	0.0020555	140	0	1	1	3514	8	0.00227661	540	0	1	1	1
AT1G55150.1	804	353	0.439055	97	56	2.29672e-12	2.69491e-11	1064	3	0.00281955	125	1	0.783843	1	3877	20	0.00515863	463	0	1	1	728	0	0	87	0	1	1	955	1	0.00104712	116	0	1	1	3578	7	0.0019564	441	0	1	1	1
AT1G55170.1	485	179	0.369072	62	34	2.49839e-07	1.79438e-06	700	1	0.00142857	81	0	1	1	1763	3	0.00170164	241	0	1	1	564	0	0	61	0	1	1	713	2	0.00280505	81	0	1	1	1730	5	0.00289017	235	1	0.272007	1	1
AT1G55180.1	1075	548	0.509767	168	104	0	0	1122	6	0.00534759	171	3	0.345815	1	3782	20	0.00528821	559	1	0.712371	1	1108	1	0.000902527	164	0	1	1	1134	2	0.00176367	165	0	1	1	3404	3	0.000881316	535	0	1	1	1
AT1G55250.1	1450	503	0.346897	130	62	6.17134e-09	5.26616e-08	2702	4	0.00148038	258	1	0.957639	1	7889	14	0.00177462	764	0	1	1	1014	4	0.00394477	128	0	1	1	2049	6	0.00292826	259	0	1	1	5720	14	0.00244755	747	0	1	1	1
AT1G55310.1	430	180	0.418605	69	41	5.69842e-10	5.39075e-09	558	1	0.00179211	79	1	0.620183	1	1614	8	0.00495663	268	1	0.449763	1	438	1	0.00228311	74	0	1	1	550	1	0.00181818	82	0	1	1	1620	3	0.00185185	276	0	1	1	1
AT1G55325.1	1888	1274	0.674788	233	184	0	0	5001	27	0.00539892	578	4	0.92153	1	14131	36	0.00254759	1680	1	0.976363	1	1678	40	0.0238379	231	4	0.999991	1	4154	11	0.00264805	555	0	1	1	12075	20	0.00165631	1623	0	1	1	1
AT1G55350.1	2149	1374	0.639367	277	209	0	0	4507	17	0.00377191	540	5	0.7865	1	15729	44	0.00279738	1907	6	0.254298	1	2005	2	0.000997506	278	0	1	1	3663	12	0.003276	512	0	1	1	12347	34	0.00275371	1774	2	0.690652	1	1
AT1G55490.1	908	543	0.598018	100	74	0	0	1329	5	0.00376223	129	0	1	1	5791	15	0.00259023	591	0	1	1	767	0	0	102	0	1	1	1004	3	0.00298805	129	0	1	1	4511	12	0.00266016	587	1	0.547508	1	1
AT1G55540.1	2332	1191	0.51072	272	153	0	0	4838	21	0.00434064	557	3	0.9659	1	13089	31	0.0023684	1515	1	0.965855	1	1782	2	0.00112233	265	0	1	1	3657	10	0.00273448	537	0	1	1	9848	22	0.00223396	1470	1	0.862735	1	1
AT1G55590.1	923	288	0.312026	127	50	0.000121581	0.000636934	1474	5	0.00339213	197	3	0.430748	1	3649	6	0.00164429	511	0	1	1	823	0	0	123	0	1	1	1342	1	0.000745156	198	0	1	1	3283	7	0.0021322	502	0	1	1	1
AT1G55620.1	688	304	0.44186	89	52	7.30482e-12	8.25055e-11	1122	1	0.000891266	162	0	1	1	3653	8	0.00218998	500	1	0.671942	1	599	5	0.00834725	79	0	1	1	1064	0	0	157	0	1	1	3186	6	0.00188324	479	0	1	1	1
AT1G55680.1	531	226	0.425612	64	36	4.64157e-08	3.57779e-07	982	2	0.00203666	108	0	1	1	3769	12	0.00318387	409	0	1	1	418	1	0.00239234	64	0	1	1	753	0	0	108	0	1	1	2859	5	0.00174886	398	0	1	1	1
AT1G55690.1	748	234	0.312834	76	28	0.00996991	0.0403224	1511	4	0.00264725	137	1	0.813402	1	5889	13	0.00220751	572	1	0.720586	1	616	1	0.00162338	73	0	1	1	1015	2	0.00197044	128	0	1	1	4328	6	0.00138632	551	0	1	1	1
AT1G55730.1	566	315	0.556537	70	46	2.8999e-13	3.72309e-12	872	1	0.00114679	105	1	0.723811	1	3352	7	0.00208831	397	0	1	1	476	1	0.00210084	68	0	1	1	722	2	0.00277008	104	0	1	1	2825	2	0.000707965	401	0	1	1	1
AT1G55810.1	854	304	0.355972	86	44	7.1709e-08	5.42121e-07	1235	2	0.00161943	119	0	1	1	3978	9	0.00226244	392	0	1	1	604	3	0.00496689	86	0	1	1	847	1	0.00118064	119	0	1	1	2842	6	0.00211119	391	0	1	1	1
AT1G55820.1	555	237	0.427027	64	34	6.79472e-07	4.67774e-06	1368	2	0.00146199	163	0	1	1	4537	10	0.0022041	543	0	1	1	447	1	0.00223714	57	0	1	1	1168	4	0.00342466	154	0	1	1	3485	9	0.0025825	501	0	1	1	1
AT1G55870.1	1353	328	0.242424	164	54	0.00786515	0.0322999	1553	7	0.00450741	193	3	0.417895	1	4092	8	0.00195503	493	0	1	1	1137	11	0.00967458	157	1	0.999997	1	1297	4	0.00308404	189	0	1	1	3397	6	0.00176626	500	0	1	1	1
AT1G55880.1	560	188	0.335714	70	32	7.58999e-05	0.000408353	1019	4	0.00392542	123	1	0.77848	1	2846	7	0.00245959	371	1	0.562643	1	372	1	0.00268817	59	0	1	1	660	1	0.00151515	100	0	1	1	2063	5	0.00242365	322	0	1	1	1
AT1G55915.1	567	195	0.343915	68	32	3.74855e-05	0.000209109	679	5	0.00736377	91	3	0.100149	1	2865	7	0.00244328	366	0	1	1	496	1	0.00201613	69	0	1	1	645	1	0.00155039	95	0	1	1	2413	5	0.00207211	353	0	1	1	1
AT1G55930.1	930	399	0.429032	96	53	8.97964e-11	9.12432e-10	1594	8	0.00501882	157	3	0.299408	1	5294	6	0.00113336	561	1	0.71365	1	630	39	0.0619048	79	8	0.278383	1	1072	2	0.00186567	136	0	1	1	3377	5	0.0014806	466	0	1	1	1
AT1G55970.1	1716	786	0.458042	203	117	0	0	3236	12	0.00370828	367	3	0.824721	1	10657	32	0.00300272	1258	3	0.531026	1	1407	8	0.00568586	206	1	1	1	2550	5	0.00196078	361	0	1	1	8273	13	0.00157138	1263	0	1	1	1
AT1G56140.1	1465	425	0.290102	172	66	2.9524e-05	0.000167145	2271	3	0.001321	257	0	1	1	8190	26	0.0031746	936	3	0.34611	1	1132	3	0.00265018	170	0	1	1	1604	6	0.00374065	254	2	0.494508	1	5765	17	0.00294883	927	0	1	1	1
AT1G56145.1	1458	339	0.23251	175	54	0.0289532	0.108495	2308	9	0.00389948	263	3	0.622287	1	8116	30	0.0036964	888	2	0.588102	1	1163	4	0.00343938	158	2	0.999964	1	1804	9	0.00498891	247	4	0.0799823	1	5947	11	0.00184967	829	0	1	1	1
AT1G56230.1	1425	536	0.37614	167	98	0	0	1435	5	0.00348432	164	2	0.594944	1	4250	7	0.00164706	530	0	1	1	1461	3	0.00205339	186	0	1	1	1393	6	0.00430725	171	0	1	1	4161	8	0.00192261	546	0	1	1	1
AT1G56280.1	530	250	0.471698	60	40	5.07372e-12	5.79607e-11	386	3	0.00777202	43	2	0.0965615	1	1513	4	0.00264375	167	0	1	1	404	8	0.019802	59	2	0.951332	1	294	0	0	42	0	1	1	1114	2	0.00179533	168	0	1	1	1
AT1G56290.1	1013	534	0.527147	123	81	0	0	1178	4	0.00339559	139	2	0.505872	1	3936	14	0.00355691	497	0	1	1	898	4	0.00445434	119	0	1	1	970	0	0	132	0	1	1	3347	6	0.00179265	472	0	1	1	1
AT1G56310.1	646	306	0.473684	64	38	2.4825e-09	2.22065e-08	1323	11	0.00831444	123	3	0.189885	1	5042	18	0.00357001	491	0	1	1	559	0	0	68	0	1	1	1018	4	0.00392927	127	0	1	1	4057	17	0.00419029	518	1	0.503301	1	1
AT1G56460.1	827	477	0.576784	92	64	0	0	1185	5	0.00421941	123	0	1	1	3802	17	0.00447133	446	1	0.629977	1	670	2	0.00298507	85	0	1	1	862	2	0.00232019	112	0	1	1	2776	7	0.00252161	384	0	1	1	1
AT1G56500.1	2170	1097	0.50553	226	134	0	0	3037	15	0.00493908	300	3	0.70841	1	8743	16	0.00183004	885	0	1	1	1764	4	0.00226757	229	0	1	1	2320	6	0.00258621	300	0	1	1	6747	21	0.00311249	899	1	0.703132	1	1
AT1G56570.1	1039	432	0.415784	125	71	9.10383e-15	1.3406e-13	822	2	0.00243309	104	0	1	1	3861	9	0.002331	501	0	1	1	956	12	0.0125523	122	3	0.996944	1	803	4	0.00498132	101	0	1	1	3010	7	0.00232558	442	0	1	1	1
AT1G56590.1	661	352	0.532526	93	69	0	0	671	3	0.00447094	81	2	0.259246	1	3077	7	0.00227494	375	0	1	1	739	1	0.00135318	90	0	1	1	630	1	0.0015873	79	0	1	1	2955	4	0.00135364	356	0	1	1	1
AT1G57680.1	561	209	0.372549	76	35	2.94823e-05	0.000166928	657	2	0.00304414	90	1	0.66808	1	2216	8	0.00361011	298	0	1	1	542	1	0.00184502	79	0	1	1	645	1	0.00155039	94	0	1	1	2020	2	0.000990099	302	0	1	1	1
AT1G57700.1	912	585	0.641447	110	90	0	0	1311	12	0.00915332	144	4	0.100209	1	4846	7	0.00144449	561	0	1	1	953	2	0.00209864	112	0	1	1	1210	5	0.00413223	143	0	1	1	4513	7	0.00155107	573	0	1	1	1
AT1G57765.1	287	96	0.334495	26	12	0.0123413	0.0491209	256	3	0.0117188	26	2	0.0397341	0.956787	862	6	0.00696056	89	2	0.0170792	0.547163	223	0	0	25	0	1	1	158	2	0.0126582	25	0	1	1	583	1	0.00171527	87	0	1	1	1
AT1G58025.1	798	496	0.621554	90	68	0	0	1178	7	0.00594228	122	3	0.18682	1	3915	18	0.0045977	448	0	1	1	689	2	0.00290276	89	0	1	1	953	1	0.00104932	118	0	1	1	3264	10	0.00306373	427	0	1	1	1
AT1G58030.1	783	318	0.40613	92	50	6.33317e-10	5.94785e-09	1504	4	0.00265957	163	0	1	1	5918	15	0.00253464	616	0	1	1	642	0	0	86	0	1	1	1143	4	0.00349956	160	0	1	1	4379	11	0.00251199	602	0	1	1	1
AT1G58060.1	1802	1042	0.578246	216	143	0	0	2966	12	0.00404585	350	2	0.927074	1	11043	26	0.00235443	1280	1	0.942345	1	1631	3	0.00183936	212	1	1	1	2639	4	0.00151573	340	1	0.892215	1	9397	14	0.00148984	1219	0	1	1	1
AT1G58220.1	768	360	0.46875	100	67	0	0	1744	4	0.00229358	233	1	0.942455	1	4495	16	0.00355951	586	1	0.729171	1	652	5	0.00766871	97	0	1	1	1408	2	0.00142045	218	0	1	1	3713	7	0.00188527	564	0	1	1	1
AT1G58230.1	3056	1783	0.583442	352	241	0	0	6169	17	0.00275571	661	3	0.987156	1	20803	51	0.00245157	2236	5	0.555967	1	2542	3	0.00118017	343	0	1	1	4922	9	0.00182852	656	0	1	1	16802	31	0.00184502	2212	1	0.949623	1	1
AT1G58250.1	2993	1912	0.638824	333	237	0	0	5762	27	0.00468587	625	6	0.772271	1	20821	53	0.00254551	2302	0	1	1	2536	1	0.000394322	326	0	1	1	4565	11	0.00240964	606	0	1	1	16572	27	0.00162925	2226	0	1	1	1
AT1G58350.1	1182	487	0.412014	135	77	4.44089e-16	7.22206e-15	1624	6	0.00369458	188	1	0.900117	1	5830	18	0.00308748	656	0	1	1	993	3	0.00302115	131	0	1	1	1391	2	0.00143781	185	0	1	1	4514	9	0.0019938	632	0	1	1	1
AT1G58440.1	1008	319	0.316468	110	50	1.06676e-06	7.18019e-06	1080	3	0.00277778	127	2	0.458805	1	3846	9	0.00234009	468	0	1	1	907	3	0.00330761	112	0	1	1	1007	0	0	129	0	1	1	3473	7	0.00201555	456	0	1	1	1
AT1G59580.1	655	188	0.287023	72	32	0.000146699	0.000760037	654	1	0.00152905	68	0	1	1	3306	7	0.00211736	344	0	1	1	414	1	0.00241546	72	0	1	1	448	0	0	68	0	1	1	2278	5	0.00219491	344	0	1	1	1
AT1G59760.1	1558	563	0.361361	159	79	4.22185e-12	4.8483e-11	2156	5	0.00231911	217	0	1	1	8070	27	0.00334572	821	0	1	1	1291	18	0.0139427	163	2	0.999975	1	1601	1	0.00062461	213	0	1	1	6091	12	0.00197012	825	0	1	1	1
AT1G59890.1	1378	884	0.641509	160	120	0	0	2434	11	0.00451931	275	2	0.848987	1	9096	25	0.00274846	1026	0	1	1	1219	3	0.00246103	160	0	1	1	1988	2	0.00100604	271	0	1	1	7601	13	0.0017103	1025	0	1	1	1
AT1G60070.1	1325	709	0.535094	139	91	0	0	2207	5	0.00226552	224	0	1	1	6898	17	0.00246448	725	1	0.801331	1	1011	7	0.00692384	141	0	1	1	1735	5	0.00288184	228	0	1	1	5336	15	0.00281109	744	0	1	1	1
AT1G60140.1	1085	339	0.312442	134	61	7.01155e-08	5.3133e-07	1591	5	0.00314268	184	2	0.657119	1	6223	11	0.00176764	756	0	1	1	771	18	0.0233463	120	2	0.999378	1	1171	2	0.00170794	168	0	1	1	4666	16	0.00342906	704	0	1	1	1
AT1G60200.1	951	525	0.55205	137	88	0	0	1321	3	0.00227101	184	2	0.657119	1	4537	21	0.00462861	618	3	0.160582	1	1013	3	0.0029615	138	0	1	1	1344	3	0.00223214	187	0	1	1	4594	14	0.00304745	651	0	1	1	1
AT1G60230.1	705	137	0.194326	78	26	0.0455321	0.164965	1084	6	0.00553506	123	2	0.442541	1	3679	5	0.00135906	424	0	1	1	548	1	0.00182482	77	0	1	1	789	1	0.00126743	120	0	1	1	2481	5	0.00201532	384	0	1	1	1
AT1G60420.1	956	351	0.367155	128	59	6.59667e-08	5.00919e-07	804	2	0.00248756	107	1	0.730498	1	3730	7	0.00187668	522	0	1	1	843	2	0.00237248	122	0	1	1	680	0	0	98	0	1	1	3338	10	0.00299581	489	0	1	1	1
AT1G60490.1	1196	454	0.379599	134	60	1.83188e-07	1.33122e-06	1784	4	0.00224215	197	0	1	1	6607	12	0.00181626	748	1	0.81126	1	969	1	0.00103199	136	0	1	1	1473	5	0.00339443	195	1	0.721296	1	5290	16	0.00302457	734	0	1	1	1
AT1G60560.1	1105	375	0.339367	137	59	1.14003e-06	7.65297e-06	1130	3	0.00265487	137	0	1	1	4942	6	0.00121408	584	0	1	1	1000	2	0.002	140	1	0.999989	1	985	4	0.00406091	135	0	1	1	4173	6	0.00143781	589	0	1	1	1
AT1G60620.1	759	207	0.272727	79	35	7.94684e-05	0.000425882	761	4	0.00525624	81	0	1	1	3031	11	0.00362917	351	0	1	1	575	1	0.00173913	72	0	1	1	620	2	0.00322581	72	0	1	1	2381	4	0.00167997	303	1	0.335902	1	1
AT1G60650.1	480	150	0.3125	61	31	7.02882e-06	4.30146e-05	537	2	0.00372439	58	1	0.508715	1	1714	11	0.00641774	222	2	0.0883146	1	538	12	0.0223048	82	2	0.990141	1	448	1	0.00223214	68	0	1	1	1602	3	0.00187266	260	0	1	1	1
AT1G60770.1	874	285	0.326087	99	41	0.000131587	0.000687531	1128	5	0.00443262	124	1	0.781178	1	3510	8	0.0022792	417	1	0.605267	1	718	0	0	92	0	1	1	941	0	0	123	0	1	1	2759	3	0.00108735	400	0	1	1	1
AT1G60800.1	1067	301	0.282099	125	55	1.14462e-06	7.68144e-06	1491	2	0.00134138	156	1	0.85216	1	5137	11	0.00214133	557	0	1	1	741	3	0.00404858	110	0	1	1	1002	5	0.00499002	150	0	1	1	3483	5	0.00143554	511	0	1	1	1
AT1G60850.1	853	333	0.390387	78	40	2.5512e-07	1.82957e-06	859	3	0.00349243	77	0	1	1	3529	14	0.00396713	330	1	0.520788	1	681	0	0	78	0	1	1	644	2	0.00310559	74	0	1	1	2478	8	0.00322841	317	0	1	1	1
AT1G60860.1	1262	544	0.431062	118	71	1.11022e-16	1.90152e-15	2096	7	0.00333969	193	0	1	1	7426	22	0.00296256	681	1	0.780858	1	875	0	0	118	0	1	1	1492	3	0.00201072	193	0	1	1	5192	10	0.00192604	681	0	1	1	1
AT1G60900.1	860	391	0.454651	123	79	0	0	1106	6	0.00542495	155	2	0.564323	1	3996	17	0.00425425	537	1	0.697913	1	961	1	0.00104058	119	0	1	1	1079	3	0.00278035	140	0	1	1	3291	11	0.00334245	487	0	1	1	1
AT1G60995.1	913	580	0.635268	111	88	0	0	1654	6	0.00362757	177	1	0.885703	1	4696	10	0.00212947	510	0	1	1	717	0	0	103	0	1	1	1272	3	0.00235849	168	0	1	1	3446	14	0.00406268	471	0	1	1	1
AT1G61100.1	1241	455	0.36664	141	73	2.07478e-12	2.45976e-11	1526	10	0.00655308	167	6	0.0171348	0.460681	6301	11	0.00174575	711	0	1	1	1070	4	0.00373832	128	0	1	1	1171	3	0.00256191	150	0	1	1	4676	6	0.00128315	621	0	1	1	1
AT1G61140.1	1256	669	0.532643	146	99	0	0	3318	8	0.00241109	362	1	0.988156	1	9067	21	0.00231609	1024	1	0.897984	1	999	0	0	146	0	1	1	2559	7	0.00273544	360	0	1	1	7406	25	0.00337564	1063	1	0.762127	1	1
AT1G61215.1	845	369	0.436686	125	74	1.11022e-16	1.90152e-15	865	3	0.00346821	120	0	1	1	2532	5	0.00197472	375	3	0.0523885	1	823	1	0.00121507	119	0	1	1	778	2	0.00257069	116	0	1	1	2270	3	0.00132159	354	0	1	1	1
AT1G61250.1	808	228	0.282178	69	29	0.0009005	0.00420306	959	3	0.00312826	82	0	1	1	2898	11	0.00379572	254	1	0.432321	1	594	0	0	68	0	1	1	649	1	0.00154083	79	0	1	1	2076	2	0.000963391	251	0	1	1	1
AT1G61580.1	344	114	0.331395	44	18	0.011079	0.0444709	726	4	0.00550964	78	3	0.0702065	1	3388	10	0.00295159	404	0	1	1	273	1	0.003663	40	0	1	1	550	1	0.00181818	75	0	1	1	2653	8	0.00301545	366	0	1	1	1
AT1G61640.1	1093	560	0.512351	137	101	0	0	1134	5	0.00440917	139	0	1	1	4313	19	0.00440529	520	0	1	1	900	2	0.00222222	135	1	0.999984	1	882	3	0.00340136	134	0	1	1	3282	7	0.00213285	494	0	1	1	1
AT1G61690.1	1255	593	0.47251	161	95	0	0	2368	6	0.00253378	292	2	0.871532	1	7404	21	0.0028363	971	1	0.885191	1	1158	2	0.00172712	157	0	1	1	2111	6	0.00284225	282	0	1	1	5885	16	0.00271878	878	1	0.69459	1	1
AT1G61770.1	891	295	0.331089	79	38	3.8136e-06	2.39553e-05	875	3	0.00342857	77	0	1	1	2490	3	0.00120482	240	1	0.414325	1	675	0	0	77	0	1	1	656	0	0	76	0	1	1	2036	11	0.00540275	241	0	1	1	1
AT1G61850.1	2008	769	0.382968	243	101	2.471e-09	2.21119e-08	2738	9	0.00328707	311	5	0.329518	1	9062	21	0.00231737	1043	0	1	1	1582	7	0.00442478	219	1	1	1	2205	12	0.00544218	285	0	1	1	7389	13	0.00175937	977	0	1	1	1
AT1G61860.1	639	271	0.4241	83	49	1.72009e-11	1.87271e-10	755	3	0.00397351	91	1	0.672122	1	2915	5	0.00171527	342	0	1	1	614	1	0.00162866	84	0	1	1	715	1	0.0013986	89	0	1	1	2455	6	0.00244399	323	0	1	1	1
AT1G61900.1	597	255	0.427136	77	51	9.32587e-15	1.37204e-13	914	0	0	102	0	1	1	3469	11	0.00317094	356	2	0.188498	1	593	14	0.0236088	80	2	0.98864	1	766	4	0.00522193	102	0	1	1	2781	4	0.00143833	369	0	1	1	1
AT1G61990.1	517	233	0.450677	60	36	4.36322e-09	3.77425e-08	827	2	0.00241838	99	0	1	1	2697	9	0.00333704	343	1	0.534476	1	345	1	0.00289855	52	1	0.985682	1	588	1	0.00170068	83	0	1	1	1865	8	0.00428954	294	0	1	1	1
AT1G62200.1	826	258	0.312349	99	50	1.65871e-08	1.34738e-07	1282	2	0.00156006	142	0	1	1	4527	12	0.00265076	485	2	0.293646	1	705	0	0	104	0	1	1	978	1	0.00102249	146	0	1	1	3300	6	0.00181818	498	0	1	1	1
AT1G62250.1	589	335	0.568761	70	55	0	0	528	4	0.00757576	65	0	1	1	1930	15	0.00777202	220	1	0.387624	1	553	1	0.00180832	63	1	0.994168	1	476	0	0	55	0	1	1	1557	2	0.00128452	196	0	1	1	1
AT1G62260.1	1045	229	0.219139	126	43	0.00838061	0.0343169	1066	4	0.00375235	122	1	0.775749	1	4262	14	0.00328484	551	0	1	1	760	12	0.0157895	120	3	0.996509	1	778	0	0	121	0	1	1	3103	9	0.00290042	515	0	1	1	1
AT1G62310.1	1424	446	0.313202	154	62	8.95798e-06	5.4103e-05	1622	15	0.00924784	177	5	0.0666156	1	6637	28	0.00421877	747	0	1	1	1259	0	0	152	0	1	1	1400	5	0.00357143	172	0	1	1	5560	10	0.00179856	717	0	1	1	1
AT1G62330.1	1527	303	0.198428	192	57	0.051326	0.184288	1368	3	0.00219298	157	0	1	1	3826	6	0.00156822	479	0	1	1	1598	30	0.0187735	196	5	0.999547	1	1326	2	0.0015083	159	0	1	1	3998	6	0.00150075	496	0	1	1	1
AT1G62390.1	969	396	0.408669	124	66	4.50062e-12	5.16104e-11	1524	5	0.00328084	186	1	0.897638	1	4002	8	0.001999	540	0	1	1	769	1	0.00130039	105	0	1	1	1275	6	0.00470588	169	0	1	1	2992	4	0.0013369	483	0	1	1	1
AT1G62640.1	794	269	0.338791	76	36	1.0498e-05	6.27484e-05	1198	2	0.00166945	117	0	1	1	3569	8	0.00224152	358	0	1	1	580	11	0.0189655	72	2	0.980072	1	881	2	0.00227015	107	0	1	1	2635	7	0.00265655	329	0	1	1	1
AT1G62830.1	1606	342	0.212951	215	62	0.0727961	0.253818	1307	6	0.00459067	169	1	0.873931	1	4772	11	0.00230511	638	0	1	1	1276	2	0.0015674	212	1	1	1	1097	3	0.00273473	178	0	1	1	3781	6	0.00158688	644	0	1	1	1
AT1G62950.1	1448	380	0.262431	165	68	1.2842e-06	8.55618e-06	1812	5	0.00275938	195	1	0.908327	1	5961	13	0.00218084	710	0	1	1	1072	20	0.0186567	160	3	0.999774	1	1343	0	0	189	0	1	1	4382	12	0.00273848	682	0	1	1	1
AT1G63010.1	1214	693	0.57084	139	103	0	0	1410	2	0.00141844	149	1	0.838919	1	5484	8	0.00145879	576	1	0.723066	1	1055	14	0.0132701	144	2	0.999896	1	1059	1	0.000944287	154	0	1	1	4149	10	0.00241022	600	1	0.555385	1	1
AT1G63020.1	2516	1758	0.698728	333	285	0	0	3050	7	0.00229508	405	4	0.72709	1	8472	22	0.00259679	1144	2	0.722612	1	2515	3	0.00119284	336	0	1	1	3126	8	0.00255918	413	1	0.93319	1	8324	20	0.00240269	1142	0	1	1	1
AT1G63050.1	938	185	0.197228	100	29	0.163766	0.528116	1004	3	0.00298805	100	2	0.344319	1	3600	8	0.00222222	351	0	1	1	851	32	0.0376028	105	5	0.921505	1	872	3	0.00344037	107	0	1	1	2862	10	0.00349406	377	0	1	1	1
AT1G63110.1	690	285	0.413043	81	37	2.21578e-05	0.000127442	1119	1	0.000893655	115	0	1	1	4050	14	0.00345679	416	2	0.237118	1	592	0	0	74	0	1	1	853	2	0.00234467	110	0	1	1	2989	9	0.00301104	391	0	1	1	1
AT1G63120.1	495	142	0.286869	63	29	0.000139105	0.000723429	524	2	0.00381679	61	0	1	1	2288	7	0.00305944	295	0	1	1	420	1	0.00238095	60	0	1	1	406	1	0.00246305	58	0	1	1	2018	3	0.00148662	281	0	1	1	1
AT1G63160.1	693	198	0.285714	76	25	0.0568679	0.2027	783	5	0.0063857	85	0	1	1	2703	10	0.00369959	295	0	1	1	559	1	0.00178891	76	0	1	1	639	3	0.00469484	85	0	1	1	2237	8	0.00357622	295	0	1	1	1
AT1G63250.1	755	218	0.288742	118	46	0.000288755	0.00144006	686	1	0.00145773	113	1	0.749602	1	2312	8	0.00346021	370	0	1	1	557	2	0.00359066	94	1	0.999536	1	492	1	0.00203252	85	0	1	1	1730	4	0.00231214	330	0	1	1	1
AT1G63270.1	460	110	0.23913	54	20	0.0251653	0.0952076	361	1	0.00277008	40	0	1	1	1554	3	0.0019305	197	0	1	1	346	0	0	41	0	1	1	291	1	0.00343643	36	0	1	1	996	1	0.00100402	141	0	1	1	1
AT1G63300.1	1712	419	0.244743	166	64	3.25698e-05	0.000182878	2385	8	0.0033543	220	0	1	1	8229	23	0.00279499	860	0	1	1	1369	14	0.0102264	155	2	0.999955	1	1757	11	0.00626067	205	1	0.738971	1	5414	27	0.00498707	722	0	1	1	1
AT1G63430.1	1103	489	0.443336	111	62	1.19105e-12	1.4416e-11	1373	5	0.00364166	144	3	0.256637	1	6224	27	0.00433805	606	0	1	1	870	1	0.00114943	111	0	1	1	1066	3	0.00281426	141	0	1	1	4434	9	0.00202977	598	0	1	1	1
AT1G63500.1	643	275	0.427683	62	35	6.28875e-08	4.79433e-07	1099	13	0.0118289	97	3	0.115421	1	4430	9	0.0020316	414	0	1	1	525	2	0.00380952	73	0	1	1	792	0	0	110	0	1	1	3405	11	0.00323054	455	0	1	1	1
AT1G63520.1	662	274	0.413897	76	46	2.10973e-11	2.27218e-10	1135	4	0.00352423	127	2	0.458805	1	4230	12	0.00283688	457	0	1	1	572	1	0.00174825	74	0	1	1	986	3	0.0030426	122	0	1	1	3348	3	0.000896057	440	0	1	1	1
AT1G63640.1	1062	586	0.551789	133	95	0	0	2101	15	0.00713946	250	6	0.0872569	1	7934	20	0.0025208	904	0	1	1	1144	2	0.00174825	140	0	1	1	2028	5	0.00246548	252	0	1	1	7277	10	0.00137419	893	0	1	1	1
AT1G63660.1	1014	323	0.31854	118	50	1.23179e-05	7.27747e-05	917	2	0.00218103	99	0	1	1	3977	16	0.00402313	493	0	1	1	747	1	0.00133869	113	0	1	1	705	1	0.00141844	95	0	1	1	3038	5	0.00164582	447	0	1	1	1
AT1G63670.1	1058	364	0.344045	104	46	6.95661e-06	4.26542e-05	1479	2	0.00135227	134	1	0.806414	1	5986	12	0.00200468	593	1	0.733364	1	861	8	0.00929152	104	0	1	1	1077	0	0	130	0	1	1	4361	7	0.00160514	560	0	1	1	1
AT1G63690.1	1048	354	0.337786	109	49	2.01767e-06	1.31456e-05	1305	6	0.0045977	136	1	0.811101	1	4466	9	0.00201523	486	0	1	1	889	2	0.00224972	108	0	1	1	1055	2	0.00189573	134	0	1	1	3701	6	0.00162118	479	0	1	1	1
AT1G63770.1	1150	402	0.349565	122	50	3.60021e-05	0.000201208	2617	8	0.00305694	261	0	1	1	8676	27	0.00311203	858	0	1	1	939	6	0.00638978	118	4	0.985267	1	2034	6	0.00294985	252	0	1	1	6764	16	0.00236546	838	0	1	1	1
AT1G63980.1	647	233	0.360124	68	32	3.74855e-05	0.000209109	829	1	0.00120627	83	0	1	1	3032	12	0.00395778	333	0	1	1	612	6	0.00980392	68	2	0.973693	1	716	1	0.00139665	84	0	1	1	2593	5	0.00192827	344	0	1	1	1
AT1G64040.1	509	187	0.367387	60	29	4.61712e-05	0.000254836	613	1	0.00163132	76	1	0.60596	1	2424	4	0.00165017	294	0	1	1	406	0	0	54	0	1	1	533	2	0.00375235	71	0	1	1	1809	5	0.00276396	252	0	1	1	1
AT1G64050.1	1022	409	0.400196	116	59	6.31069e-10	5.92906e-09	1335	3	0.00224719	143	1	0.826629	1	5309	11	0.00207195	613	0	1	1	891	15	0.016835	113	2	0.998956	1	1038	0	0	142	0	1	1	4167	8	0.00191985	596	0	1	1	1
AT1G64140.1	575	399	0.693913	100	83	0	0	812	8	0.00985222	140	4	0.0927568	1	2550	12	0.00470588	435	0	1	1	791	3	0.00379267	108	0	1	1	1048	3	0.0028626	145	0	1	1	2987	5	0.00167392	447	0	1	1	1
AT1G64385.1	617	250	0.405186	62	38	6.84575e-10	6.41043e-09	676	0	0	68	0	1	1	2515	3	0.00119284	282	0	1	1	435	0	0	58	0	1	1	491	1	0.00203666	66	0	1	1	1884	5	0.00265393	277	0	1	1	1
AT1G64530.1	1366	454	0.332357	188	91	7.29528e-13	8.99095e-12	1685	1	0.000593472	221	0	1	1	5361	11	0.00205186	714	0	1	1	1309	13	0.00993125	183	2	0.999995	1	1500	4	0.00266667	210	0	1	1	4566	14	0.00306614	679	0	1	1	1
AT1G64550.1	1073	349	0.325256	125	46	0.00123577	0.00568608	1610	6	0.00372671	173	4	0.16164	1	5532	16	0.00289226	605	2	0.389913	1	917	2	0.00218103	127	0	1	1	1212	3	0.00247525	168	0	1	1	4187	7	0.00167184	565	0	1	1	1
AT1G64570.1	1219	727	0.59639	176	125	0	0	2655	4	0.00150659	344	3	0.790171	1	8030	29	0.00361146	1036	1	0.900677	1	1355	3	0.00221402	183	0	1	1	2371	4	0.00168705	327	1	0.882632	1	6715	14	0.00208488	978	0	1	1	1
AT1G64600.1	932	229	0.245708	115	41	0.00424626	0.0181204	1249	4	0.00320256	140	2	0.509673	1	3882	11	0.00283359	464	1	0.64453	1	859	1	0.00116414	109	0	1	1	1042	1	0.000959693	129	0	1	1	3130	7	0.00223642	423	1	0.435286	1	1
AT1G64650.1	669	188	0.281016	89	31	0.0167428	0.0653734	873	5	0.00572738	118	3	0.174697	1	3427	9	0.0026262	437	1	0.622479	1	595	4	0.00672269	79	0	1	1	778	1	0.00128535	104	0	1	1	2740	5	0.00182482	382	0	1	1	1
AT1G64790.1	3467	2125	0.612922	349	249	0	0	7004	26	0.00371216	668	1	0.999721	1	25069	81	0.00323108	2414	3	0.903842	1	2785	8	0.00287253	347	0	1	1	5235	10	0.00191022	663	0	1	1	18625	44	0.00236242	2375	0	1	1	1
AT1G64810.1	449	169	0.376392	58	31	1.75659e-06	1.15196e-05	669	1	0.00149477	80	0	1	1	3518	3	0.000852757	413	0	1	1	364	0	0	52	0	1	1	573	2	0.0034904	77	0	1	1	2801	6	0.00214209	386	0	1	1	1
AT1G64860.1	690	305	0.442029	79	50	2.43916e-13	3.1518e-12	940	5	0.00531915	104	1	0.720406	1	4090	11	0.00268949	436	0	1	1	611	1	0.00163666	76	0	1	1	818	3	0.00366748	98	0	1	1	2873	6	0.00208841	406	0	1	1	1
AT1G64890.1	891	228	0.255892	109	42	0.000683496	0.00324191	829	0	0	101	0	1	1	2821	7	0.00248139	339	0	1	1	696	2	0.00287356	109	0	1	1	610	0	0	100	0	1	1	2032	5	0.00246063	321	0	1	1	1
AT1G65010.1	1406	600	0.426743	141	77	1.26565e-14	1.83893e-13	3397	12	0.00353253	300	2	0.881031	1	9259	30	0.00324009	972	3	0.367748	1	1235	2	0.00161943	132	0	1	1	2635	8	0.00303605	284	0	1	1	7118	13	0.00182636	909	0	1	1	1
AT1G65040.1	581	263	0.452668	50	27	6.24446e-06	3.84449e-05	820	3	0.00365854	83	0	1	1	2680	3	0.0011194	243	0	1	1	344	0	0	49	0	1	1	608	4	0.00657895	83	0	1	1	1687	5	0.00296384	240	0	1	1	1
AT1G65070.1	1268	372	0.293375	161	63	2.19559e-05	0.000126326	1810	9	0.00497238	205	3	0.456131	1	6029	13	0.00215624	730	0	1	1	1143	3	0.00262467	152	0	1	1	1397	2	0.00143164	196	0	1	1	4887	10	0.00204625	692	0	1	1	1
AT1G65120.1	1364	629	0.461144	157	98	0	0	2220	4	0.0018018	247	0	1	1	7789	35	0.00449352	915	2	0.604324	1	1122	0	0	151	0	1	1	1779	4	0.00224845	232	0	1	1	5912	11	0.00186062	859	0	1	1	1
AT1G65230.1	525	129	0.245714	53	25	0.000245205	0.00123441	590	1	0.00169492	58	0	1	1	2074	4	0.00192864	216	0	1	1	463	11	0.0237581	55	4	0.634756	1	503	3	0.00596421	60	0	1	1	1741	5	0.00287191	210	0	1	1	1
AT1G65540.1	934	422	0.45182	94	51	4.65198e-10	4.42787e-09	1663	2	0.00120265	168	0	1	1	6411	12	0.00187178	668	1	0.774415	1	788	4	0.00507614	93	0	1	1	1355	3	0.00221402	165	0	1	1	5140	8	0.00155642	658	0	1	1	1
AT1G65580.1	1787	728	0.407387	201	105	0	0	2016	10	0.00496032	237	4	0.327194	1	6786	19	0.00279988	813	0	1	1	1397	5	0.0035791	210	0	1	1	1733	7	0.00403924	247	2	0.479907	1	6059	10	0.00165044	927	0	1	1	1
AT1G65650.1	408	239	0.585784	53	39	6.05072e-14	8.27293e-13	795	1	0.00125786	99	0	1	1	2235	4	0.00178971	276	1	0.459488	1	348	0	0	51	0	1	1	659	1	0.00151745	98	0	1	1	1732	0	0	259	0	1	1	1
AT1G65820.1	441	50	0.113379	36	6	0.901385	1	444	2	0.0045045	36	1	0.3567	1	1566	3	0.00191571	128	0	1	1	335	1	0.00298507	36	0	1	1	328	0	0	36	0	1	1	1148	1	0.00087108	128	0	1	1	1
AT1G65840.1	890	272	0.305618	101	45	6.89332e-06	4.22932e-05	1282	2	0.00156006	131	0	1	1	4002	10	0.00249875	418	0	1	1	657	0	0	99	0	1	1	865	4	0.00462428	127	0	1	1	2851	5	0.00175377	406	0	1	1	1
AT1G65920.1	1798	488	0.271413	213	83	1.51424e-06	1.00303e-05	1919	6	0.00312663	216	3	0.490216	1	7279	24	0.00329716	848	2	0.56317	1	1437	5	0.00347947	201	1	1	1	1392	3	0.00215517	197	1	0.724924	1	5533	14	0.00253027	758	0	1	1	1
AT1G65950.1	1011	334	0.330366	103	46	5.07149e-06	3.15348e-05	1382	2	0.00144718	132	0	1	1	4542	12	0.00264201	430	0	1	1	900	1	0.00111111	117	0	1	1	1115	5	0.0044843	139	0	1	1	3630	6	0.00165289	429	0	1	1	1
AT1G66150.1	1472	526	0.357337	186	104	0	0	1926	5	0.00259605	214	2	0.735731	1	6548	12	0.00183262	799	0	1	1	1298	5	0.00385208	175	2	0.99999	1	1518	1	0.000658762	207	0	1	1	5224	11	0.00210567	769	0	1	1	1
AT1G66250.1	818	340	0.415648	108	65	2.44249e-15	3.76059e-14	870	3	0.00344828	108	3	0.145458	1	2929	4	0.00136565	354	0	1	1	859	3	0.00349243	118	0	1	1	825	3	0.00363636	111	0	1	1	2617	5	0.00191058	376	0	1	1	1
AT1G66330.1	804	271	0.337065	84	44	2.89169e-08	2.28926e-07	960	6	0.00625	90	1	0.66808	1	3770	10	0.00265252	383	0	1	1	677	9	0.0132939	84	3	0.964958	1	732	1	0.00136612	90	0	1	1	3034	6	0.00197759	383	0	1	1	1
AT1G66340.1	1011	509	0.503462	141	91	0	0	1114	4	0.00359066	134	0	1	1	5166	11	0.00212931	630	0	1	1	1076	0	0	155	0	1	1	1032	3	0.00290698	144	0	1	1	4833	14	0.00289675	665	0	1	1	1
AT1G66410.1	213	85	0.399061	25	15	0.000152865	0.000790024	378	2	0.00529101	43	1	0.40958	1	961	0	0	113	0	1	1	259	0	0	26	0	1	1	415	1	0.00240964	42	0	1	1	980	1	0.00102041	107	0	1	1	1
AT1G66430.1	623	284	0.455859	74	40	3.85672e-08	3.01347e-07	732	8	0.010929	82	0	1	1	2994	12	0.00400802	357	2	0.189298	1	457	1	0.00218818	69	0	1	1	509	1	0.00196464	78	0	1	1	2094	3	0.00143266	333	0	1	1	1
AT1G67040.1	1375	581	0.422545	158	80	8.75078e-13	1.07379e-11	1656	6	0.00362319	180	2	0.645327	1	5644	17	0.00301205	677	0	1	1	1180	40	0.0338983	158	6	0.986927	1	1380	0	0	178	0	1	1	4487	15	0.00334299	622	0	1	1	1
AT1G67120.1	5929	3093	0.521673	665	429	0	0	13073	23	0.00175935	1359	3	0.999991	1	43919	110	0.00250461	4742	2	0.999703	1	4970	17	0.00342052	647	3	1	1	10262	20	0.00194894	1329	0	1	1	35000	75	0.00214286	4613	0	1	1	1
AT1G67140.1	3120	1605	0.514423	318	198	0	0	6203	19	0.00306303	591	5	0.845947	1	20684	59	0.00285245	2005	0	1	1	2371	24	0.0101223	310	2	1	1	4490	10	0.00222717	561	2	0.881239	1	14973	30	0.00200361	1916	0	1	1	1
AT1G67170.1	390	123	0.315385	54	21	0.0122992	0.0489877	836	3	0.00358852	103	0	1	1	2458	4	0.00162734	320	0	1	1	371	0	0	53	0	1	1	814	1	0.0012285	106	0	1	1	2335	5	0.00214133	329	1	0.358823	1	1
AT1G67190.1	677	204	0.301329	72	34	1.9827e-05	0.000114517	728	6	0.00824176	78	1	0.6155	1	3416	12	0.00351288	364	1	0.555765	1	416	7	0.0168269	70	2	0.977097	1	517	0	0	77	0	1	1	2144	5	0.00233209	354	0	1	1	1
AT1G67230.1	1271	590	0.464201	138	84	0	0	2230	6	0.00269058	241	2	0.792806	1	6654	31	0.00465885	821	0	1	1	1139	0	0	144	0	1	1	2015	8	0.00397022	244	0	1	1	5975	15	0.00251046	777	0	1	1	1
AT1G67280.1	496	126	0.254032	45	16	0.0605418	0.214552	778	3	0.00385604	71	1	0.581063	1	3146	11	0.0034965	294	0	1	1	386	3	0.00777202	43	0	1	1	784	1	0.00127551	74	0	1	1	2874	5	0.00173974	299	0	1	1	1
AT1G67420.1	1156	342	0.295848	133	58	8.51143e-07	5.76287e-06	1745	3	0.0017192	203	0	1	1	7194	18	0.00250209	803	0	1	1	967	2	0.00206825	134	0	1	1	1515	3	0.0019802	202	0	1	1	6122	10	0.00163345	810	0	1	1	1
AT1G67480.1	452	244	0.539823	71	48	1.68754e-14	2.4262e-13	687	2	0.00291121	103	0	1	1	2135	6	0.0028103	324	0	1	1	475	1	0.00210526	72	0	1	1	691	3	0.00434153	100	0	1	1	1940	5	0.00257732	327	0	1	1	1
AT1G67490.1	1337	431	0.322364	142	48	0.00685274	0.02839	1683	7	0.00415924	170	2	0.614445	1	7499	16	0.00213362	758	0	1	1	1180	32	0.0271186	156	4	0.998579	1	1312	0	0	173	0	1	1	5872	6	0.0010218	760	0	1	1	1
AT1G67500.1	2007	842	0.419532	222	120	0	0	4993	14	0.00280393	501	1	0.997843	1	16298	52	0.00319058	1678	3	0.720983	1	1654	13	0.00785973	222	2	1	1	3679	1	0.000271813	493	0	1	1	12119	22	0.00181533	1644	0	1	1	1
AT1G67530.1	923	273	0.295775	112	48	1.26311e-05	7.45242e-05	1613	4	0.00247985	197	0	1	1	5290	16	0.00302457	700	0	1	1	703	1	0.00142248	108	0	1	1	1143	2	0.00174978	189	0	1	1	3962	8	0.00201918	641	0	1	1	1
AT1G67580.1	809	274	0.33869	99	37	0.00257834	0.0113385	1426	12	0.00841515	171	3	0.345815	1	5333	22	0.00412526	669	0	1	1	674	0	0	87	0	1	1	1177	7	0.00594732	156	1	0.640156	1	3909	12	0.00306984	564	0	1	1	1
AT1G67680.1	691	193	0.279305	85	29	0.0267681	0.100929	1062	2	0.00188324	137	1	0.813402	1	3628	10	0.00275634	476	0	1	1	498	10	0.0200803	85	4	0.908182	1	791	2	0.00252845	140	0	1	1	2718	6	0.00220751	462	0	1	1	1
AT1G67690.1	1378	556	0.403483	124	63	1.79577e-10	1.774e-09	2064	4	0.00193798	171	0	1	1	7063	17	0.00240691	608	1	0.742133	1	945	4	0.0042328	123	1	0.999957	1	1306	0	0	170	0	1	1	4339	10	0.00230468	597	0	1	1	1
AT1G67700.1	405	147	0.362963	58	19	0.091679	0.313173	477	1	0.00209644	63	0	1	1	1538	4	0.00260078	194	0	1	1	351	0	0	53	0	1	1	418	3	0.00717703	58	0	1	1	1253	5	0.00399042	174	0	1	1	1
AT1G67720.1	1188	379	0.319024	138	56	1.79925e-05	0.000104222	2134	9	0.00421743	242	1	0.948464	1	7489	17	0.00227	840	2	0.558055	1	875	0	0	127	0	1	1	1635	2	0.00122324	227	0	1	1	5321	12	0.00225522	779	0	1	1	1
AT1G67800.1	651	204	0.313364	70	30	0.000500154	0.00240993	972	6	0.00617284	99	1	0.702739	1	4180	15	0.00358852	424	0	1	1	552	1	0.00181159	71	0	1	1	749	3	0.00400534	100	0	1	1	3020	6	0.00198675	423	0	1	1	1
AT1G67840.1	749	248	0.331108	93	44	1.20833e-06	8.08324e-06	1013	2	0.00197433	132	0	1	1	3949	8	0.00202583	459	0	1	1	742	1	0.00134771	100	0	1	1	960	3	0.003125	136	0	1	1	3344	7	0.0020933	486	0	1	1	1
AT1G67900.1	1003	274	0.27318	116	57	6.30815e-09	5.37334e-08	1350	10	0.00740741	132	2	0.478738	1	5422	24	0.00442641	559	3	0.130159	1	772	5	0.00647668	113	1	0.999902	1	994	1	0.00100604	129	0	1	1	4110	6	0.00145985	543	0	1	1	1
AT1G67930.1	1110	355	0.31982	144	62	6.25559e-07	4.33519e-06	1420	6	0.00422535	181	2	0.648305	1	4725	14	0.00296296	657	1	0.768815	1	1007	4	0.00397219	137	2	0.999825	1	1191	2	0.00167926	171	0	1	1	3951	9	0.0022779	577	0	1	1	1
AT1G67970.1	447	150	0.33557	52	25	0.00016821	0.000865504	736	2	0.00271739	75	0	1	1	2613	8	0.00306162	330	2	0.167881	1	416	1	0.00240385	51	0	1	1	590	0	0	76	0	1	1	2221	7	0.00315173	326	0	1	1	1
AT1G68060.1	897	362	0.403567	111	47	2.25818e-05	0.000129477	1405	4	0.00284698	161	0	1	1	4734	9	0.00190114	539	0	1	1	797	0	0	105	0	1	1	1164	0	0	158	0	1	1	4111	5	0.00121625	539	0	1	1	1
AT1G68080.1	478	198	0.414226	53	29	1.99739e-06	1.30364e-05	684	2	0.00292398	74	0	1	1	3433	6	0.00174774	346	0	1	1	446	4	0.00896861	56	0	1	1	568	0	0	76	0	1	1	2981	6	0.00201275	367	1	0.390907	1	1
AT1G68100.1	712	212	0.297753	87	32	0.00634943	0.0264304	1062	4	0.00376648	117	0	1	1	3712	8	0.00215517	439	0	1	1	546	0	0	85	0	1	1	884	1	0.00113122	118	0	1	1	3128	5	0.00159847	426	0	1	1	1
AT1G68310.1	321	137	0.426791	26	14	0.00113843	0.00525128	483	2	0.00414079	39	0	1	1	1733	6	0.0034622	138	0	1	1	219	0	0	26	0	1	1	337	1	0.00296736	39	0	1	1	1089	3	0.00275482	137	0	1	1	1
AT1G68710.1	1486	351	0.236205	145	44	0.0575123	0.204769	2678	10	0.00373413	259	1	0.958155	1	10282	25	0.00243143	1058	0	1	1	1077	1	0.000928505	138	0	1	1	1971	4	0.00202943	253	0	1	1	6952	25	0.00359609	984	0	1	1	1
AT1G68720.1	1322	718	0.543116	153	99	0	0	2889	5	0.0017307	322	1	0.980664	1	8261	35	0.00423678	1039	4	0.203244	1	1205	2	0.00165975	151	0	1	1	2402	5	0.0020816	316	2	0.61185	1	6385	19	0.00297572	902	0	1	1	1
AT1G68790.1	1243	464	0.37329	120	55	2.27379e-07	1.636e-06	2435	6	0.00246407	232	0	1	1	8086	16	0.00197873	866	0	1	1	955	1	0.00104712	110	0	1	1	1761	3	0.00170358	208	1	0.744051	1	5449	14	0.00256928	748	0	1	1	1
AT1G68830.1	920	189	0.205435	99	34	0.0158807	0.0622149	1215	2	0.00164609	128	0	1	1	4983	20	0.00401365	516	0	1	1	700	10	0.0142857	94	2	0.995826	1	922	1	0.0010846	123	0	1	1	3586	9	0.00250976	498	1	0.489699	1	1
AT1G68890.1	2147	940	0.43782	234	131	0	0	3666	12	0.00327332	369	2	0.939675	1	15215	30	0.00197174	1536	1	0.967416	1	1866	2	0.00107181	244	0	1	1	2857	4	0.00140007	374	0	1	1	11403	22	0.00192932	1548	0	1	1	1
AT1G68910.1	541	227	0.419593	57	30	3.9062e-06	2.45049e-05	1319	9	0.00682335	138	2	0.502053	1	4993	17	0.00340477	545	0	1	1	452	1	0.00221239	54	0	1	1	1077	0	0	135	0	1	1	3775	10	0.00264901	526	0	1	1	1
AT1G68930.1	963	316	0.328141	98	40	0.000228159	0.00115101	1558	5	0.00320924	158	1	0.855739	1	6106	10	0.00163773	662	0	1	1	564	0	0	88	0	1	1	921	4	0.00434311	142	0	1	1	3626	6	0.00165472	591	0	1	1	1
AT1G68990.1	1287	545	0.423465	143	82	0	0	2486	9	0.00362027	260	2	0.826159	1	7410	16	0.00215924	844	0	1	1	1159	14	0.0120794	143	2	0.999888	1	2135	2	0.000936768	255	0	1	1	6747	15	0.00222321	859	0	1	1	1
AT1G69010.1	482	124	0.257261	50	18	0.0430673	0.156603	583	2	0.00343053	68	0	1	1	2402	6	0.00249792	278	0	1	1	367	0	0	50	0	1	1	463	1	0.00215983	66	0	1	1	1878	1	0.000532481	277	0	1	1	1
AT1G69060.1	858	241	0.280886	94	36	0.00179541	0.00807084	1461	11	0.00752909	152	3	0.282887	1	5010	15	0.00299401	544	0	1	1	707	4	0.00565771	92	0	1	1	1158	0	0	152	0	1	1	4021	12	0.00298433	541	0	1	1	1
AT1G69070.1	1278	310	0.242567	133	39	0.107567	0.361265	1870	7	0.00374332	182	1	0.892496	1	6727	19	0.00282444	761	0	1	1	941	1	0.0010627	129	1	0.999973	1	1307	4	0.00306044	177	0	1	1	5006	11	0.00219736	755	0	1	1	1
AT1G69170.1	453	178	0.392936	50	28	1.60572e-06	1.05895e-05	936	7	0.00747863	91	1	0.672122	1	3620	12	0.00331492	358	0	1	1	377	1	0.00265252	50	0	1	1	636	3	0.00471698	87	0	1	1	2340	2	0.000854701	333	0	1	1	1
AT1G69200.1	635	175	0.275591	74	28	0.00662145	0.0274745	1195	6	0.00502092	132	2	0.478738	1	4318	9	0.0020843	553	0	1	1	560	0	0	67	0	1	1	942	4	0.00424628	119	0	1	1	3350	3	0.000895522	484	0	1	1	1
AT1G69250.1	596	139	0.233221	68	28	0.00159275	0.00723089	1426	7	0.00490884	155	3	0.292792	1	2714	7	0.00257922	309	0	1	1	556	94	0.169065	72	16	0.000119481	0.00100212	1183	9	0.00760778	155	2	0.268747	1	2409	8	0.00332088	331	0	1	1	1
AT1G69330.1	244	72	0.295082	34	16	0.00322033	0.0140191	417	3	0.00719424	58	0	1	1	2072	2	0.000965251	242	0	1	1	140	0	0	25	0	1	1	231	0	0	44	0	1	1	1059	1	0.000944287	170	0	1	1	1
AT1G69340.1	943	445	0.471898	110	68	0	0	1617	3	0.00185529	160	1	0.859232	1	4643	9	0.0019384	488	0	1	1	826	0	0	110	0	1	1	1263	6	0.00475059	160	0	1	1	3615	4	0.0011065	482	0	1	1	1
AT1G69360.1	928	355	0.382543	108	56	6.65244e-10	6.23793e-09	1767	3	0.00169779	198	2	0.69592	1	7341	12	0.00163465	821	0	1	1	661	0	0	102	0	1	1	1284	2	0.00155763	196	0	1	1	5294	11	0.00207782	788	0	1	1	1
AT1G69390.1	443	260	0.586907	58	44	2.22045e-16	3.68852e-15	480	5	0.0104167	60	1	0.52061	1	1399	3	0.00214439	199	0	1	1	450	8	0.0177778	58	2	0.947938	1	443	1	0.00225734	60	0	1	1	1388	4	0.00288184	199	0	1	1	1
AT1G69420.1	604	207	0.342715	74	32	0.000271634	0.00135806	1666	4	0.00240096	188	2	0.668594	1	4672	14	0.00299658	537	0	1	1	537	2	0.00372439	68	0	1	1	1372	3	0.00218659	173	0	1	1	3583	6	0.00167457	494	0	1	1	1
AT1G69640.1	431	190	0.440835	48	25	3.10742e-05	0.00017489	408	8	0.0196078	47	4	0.00258565	0.0785863	1718	3	0.00174622	230	1	0.401123	1	293	0	0	42	0	1	1	272	1	0.00367647	38	0	1	1	1132	1	0.000883392	182	0	1	1	1
AT1G69740.1	816	288	0.352941	92	41	1.71438e-05	9.96545e-05	1078	5	0.00463822	119	0	1	1	3306	14	0.00423472	365	0	1	1	684	8	0.0116959	95	2	0.996117	1	887	4	0.00450958	121	0	1	1	2527	6	0.00237436	360	0	1	1	1
AT1G69830.1	1535	484	0.315309	145	67	7.8587e-09	6.63991e-08	2109	12	0.0056899	207	1	0.920863	1	7266	19	0.00261492	766	0	1	1	1179	2	0.00169635	142	0	1	1	1597	5	0.00313087	203	0	1	1	5801	14	0.00241338	761	0	1	1	1
AT1G70060.1	1925	1059	0.55013	202	134	0	0	2950	14	0.00474576	299	2	0.87988	1	10947	26	0.00237508	1141	1	0.921404	1	1573	13	0.00826446	194	2	0.999998	1	2223	7	0.0031489	284	0	1	1	8201	23	0.00280454	1059	1	0.760838	1	1
AT1G70070.1	1812	588	0.324503	224	110	8.88178e-16	1.41987e-14	2435	14	0.00574949	300	7	0.0765639	1	6953	19	0.00273263	946	1	0.878611	1	1652	1	0.000605327	218	0	1	1	2149	4	0.00186133	293	0	1	1	5991	12	0.002003	906	0	1	1	1
AT1G70160.1	699	232	0.331903	86	40	6.10941e-06	3.76666e-05	1014	3	0.00295858	112	0	1	1	4067	19	0.00467175	461	0	1	1	652	22	0.0337423	85	4	0.908182	1	826	1	0.00121065	108	0	1	1	3393	10	0.00294724	462	0	1	1	1
AT1G70180.1	475	161	0.338947	63	30	4.90665e-05	0.000270319	670	3	0.00447761	96	1	0.691608	1	3176	21	0.00661209	447	2	0.262514	1	424	1	0.00235849	66	0	1	1	492	2	0.00406504	92	0	1	1	2322	5	0.00215332	430	0	1	1	1
AT1G70280.1	547	232	0.424132	67	39	3.41579e-09	2.98701e-08	1032	5	0.00484496	135	2	0.49048	1	3062	13	0.00424559	365	2	0.195714	1	431	3	0.00696056	65	2	0.967655	1	932	1	0.00107296	142	0	1	1	2432	7	0.00287829	353	0	1	1	1
AT1G70570.1	1011	345	0.341246	133	62	1.83627e-08	1.48533e-07	1122	1	0.000891266	130	0	1	1	4068	12	0.00294985	516	1	0.683436	1	967	4	0.0041365	135	1	0.999984	1	956	2	0.00209205	139	0	1	1	3559	6	0.00168587	537	0	1	1	1
AT1G70610.1	1664	449	0.269832	167	57	0.00273505	0.0120057	1795	4	0.00222841	187	0	1	1	5580	11	0.00197133	588	0	1	1	1175	2	0.00170213	156	0	1	1	1425	1	0.000701754	182	0	1	1	4462	9	0.00201703	561	0	1	1	1
AT1G70620.1	1004	367	0.365538	130	49	0.000470621	0.00228506	2122	10	0.00471254	269	2	0.840204	1	6163	22	0.00356969	765	2	0.508048	1	797	1	0.00125471	117	1	0.999929	1	1671	5	0.00299222	246	0	1	1	4429	10	0.00225785	655	0	1	1	1
AT1G70630.1	774	327	0.422481	91	49	1.42586e-09	1.30389e-08	1439	2	0.00138985	139	0	1	1	4337	11	0.00253632	466	0	1	1	685	2	0.00291971	91	0	1	1	1013	1	0.000987167	138	0	1	1	3514	9	0.00256118	461	0	1	1	1
AT1G70740.1	746	135	0.180965	92	31	0.0269179	0.101335	978	5	0.00511247	118	0	1	1	3305	7	0.002118	377	0	1	1	545	4	0.00733945	80	1	0.998545	1	641	4	0.00624025	99	0	1	1	2185	4	0.00183066	334	0	1	1	1
AT1G70790.1	238	80	0.336134	28	19	1.39799e-06	9.30524e-06	367	1	0.0027248	46	0	1	1	1369	2	0.00146092	179	0	1	1	149	0	0	23	0	1	1	266	1	0.0037594	41	0	1	1	874	5	0.00572082	141	0	1	1	1
AT1G71010.1	2151	1196	0.55602	272	188	0	0	3315	3	0.000904977	391	2	0.951678	1	11771	32	0.00271855	1422	2	0.824672	1	1921	4	0.00208225	268	0	1	1	2829	5	0.00176741	393	0	1	1	9973	22	0.00220596	1418	0	1	1	1
AT1G71090.1	467	181	0.38758	64	30	7.09516e-05	0.00038358	736	4	0.00543478	89	0	1	1	3337	20	0.00599341	438	3	0.0756044	1	412	0	0	63	0	1	1	480	2	0.00416667	81	0	1	1	2394	6	0.00250627	405	0	1	1	1
AT1G71140.1	726	153	0.210744	88	31	0.0141353	0.0558647	1018	1	0.000982318	120	0	1	1	3421	15	0.00438468	436	0	1	1	604	0	0	83	0	1	1	797	2	0.00250941	116	0	1	1	2739	8	0.00292077	414	0	1	1	1
AT1G71210.1	1676	436	0.260143	181	55	0.0366896	0.134966	1478	3	0.00202977	158	0	1	1	6876	16	0.00232693	767	2	0.509429	1	1349	1	0.00074129	173	0	1	1	1099	3	0.00272975	146	0	1	1	4653	10	0.00214915	693	0	1	1	1
AT1G71220.1	2062	956	0.463628	221	117	0	0	3996	9	0.00225225	396	2	0.954069	1	14822	42	0.00283363	1412	0	1	1	1664	3	0.00180288	223	1	1	1	3066	8	0.00260926	401	0	1	1	10734	28	0.00260853	1418	0	1	1	1
AT1G71240.1	1289	508	0.394104	128	64	3.07304e-10	2.96379e-09	2139	6	0.00280505	207	0	1	1	7206	15	0.0020816	721	0	1	1	988	2	0.00202429	125	0	1	1	1659	2	0.00120555	203	0	1	1	5566	20	0.00359324	713	1	0.61833	1	1
AT1G71350.1	883	237	0.268403	104	32	0.0799725	0.276271	1270	3	0.0023622	145	0	1	1	4716	33	0.00699746	554	1	0.709147	1	604	3	0.00496689	95	0	1	1	830	6	0.00722892	135	1	0.587078	1	3380	7	0.00207101	509	1	0.497226	1	1
AT1G71360.1	749	299	0.399199	76	36	1.0498e-05	6.27484e-05	1290	1	0.000775194	127	0	1	1	4336	12	0.00276753	445	1	0.629152	1	542	0	0	70	0	1	1	925	4	0.00432432	113	0	1	1	3156	17	0.00538657	414	1	0.428378	1	1
AT1G71410.1	1405	631	0.44911	170	88	1.24345e-14	1.80777e-13	2561	8	0.00312378	282	3	0.668547	1	6325	17	0.00268775	726	0	1	1	1032	4	0.00387597	158	1	0.999998	1	1744	3	0.00172018	261	0	1	1	4754	9	0.00189314	675	0	1	1	1
AT1G71490.1	874	215	0.245995	99	31	0.068567	0.240893	1365	3	0.0021978	153	0	1	1	5056	15	0.00296677	581	0	1	1	600	1	0.00166667	94	0	1	1	1028	0	0	153	0	1	1	3712	6	0.00161638	588	0	1	1	1
AT1G71530.1	997	327	0.327984	123	53	3.7998e-06	2.38749e-05	1854	4	0.0021575	220	1	0.932517	1	5074	18	0.0035475	599	1	0.736907	1	635	0	0	105	0	1	1	1280	5	0.00390625	197	0	1	1	3359	9	0.00267937	533	0	1	1	1
AT1G71696.1	646	265	0.410217	64	35	1.83051e-07	1.33122e-06	1174	7	0.00596252	114	1	0.752651	1	3844	17	0.00442248	369	0	1	1	520	1	0.00192308	63	0	1	1	909	1	0.00110011	113	0	1	1	2995	6	0.00200334	354	0	1	1	1
AT1G71710.1	1475	369	0.250169	170	65	3.83626e-05	0.000213877	1589	3	0.00188798	165	0	1	1	4982	14	0.00281012	516	0	1	1	1292	3	0.00232198	162	0	1	1	1271	4	0.00314713	158	0	1	1	3582	9	0.00251256	476	0	1	1	1
AT1G71810.1	1410	408	0.289362	134	46	0.00582938	0.0244266	1920	2	0.00104167	176	0	1	1	6888	13	0.00188734	619	0	1	1	1003	8	0.00797607	133	2	0.999764	1	1400	4	0.00285714	173	0	1	1	4808	10	0.00207987	614	0	1	1	1
AT1G71820.1	1205	511	0.424066	116	60	1.89814e-10	1.87089e-09	2181	6	0.00275103	199	0	1	1	7134	16	0.00224278	665	0	1	1	852	36	0.0422535	115	7	0.8059	1	1537	3	0.00195185	195	0	1	1	4768	4	0.000838926	629	0	1	1	1
AT1G71830.1	889	350	0.393701	113	70	0	0	1570	3	0.00191083	159	0	1	1	4933	18	0.0036489	550	1	0.706542	1	858	2	0.002331	118	0	1	1	1249	1	0.000800641	151	0	1	1	3924	13	0.00331295	530	0	1	1	1
AT1G71900.1	481	139	0.288981	52	22	0.00325049	0.0141261	642	0	0	71	0	1	1	2777	7	0.00252071	300	0	1	1	389	2	0.00514139	51	0	1	1	511	0	0	70	0	1	1	2113	3	0.00141978	297	0	1	1	1
AT1G72190.1	859	232	0.270081	86	34	0.00126072	0.00579421	800	1	0.00125	76	0	1	1	3428	4	0.00116686	322	0	1	1	718	2	0.00278552	79	1	0.998421	1	619	1	0.00161551	67	0	1	1	2591	6	0.00231571	295	0	1	1	1
AT1G72250.1	1430	335	0.234266	147	46	0.0326805	0.121504	2892	11	0.0038036	285	0	1	1	10262	26	0.00253362	1093	1	0.912528	1	1080	1	0.000925926	145	0	1	1	2139	4	0.00187003	279	0	1	1	8144	17	0.00208743	1071	0	1	1	1
AT1G72320.1	854	349	0.408665	83	38	1.61998e-05	9.45334e-05	1817	3	0.00165107	163	0	1	1	7225	27	0.00373702	673	0	1	1	685	0	0	83	0	1	1	1402	7	0.00499287	165	0	1	1	5751	15	0.00260824	674	0	1	1	1
AT1G72390.1	1366	748	0.547584	164	112	0	0	2833	10	0.00352983	379	4	0.678489	1	8988	24	0.00267023	1123	0	1	1	1046	1	0.000956023	151	0	1	1	2108	6	0.0028463	337	1	0.890076	1	6147	16	0.0026029	947	1	0.721772	1	1
AT1G72480.1	738	198	0.268293	93	32	0.0183429	0.0711463	992	2	0.00201613	120	1	0.770185	1	3623	12	0.00331217	450	0	1	1	614	1	0.00162866	90	0	1	1	818	3	0.00366748	119	0	1	1	3042	7	0.00230112	449	0	1	1	1
AT1G72540.1	508	203	0.399606	62	31	1.0787e-05	6.44201e-05	1041	0	0	114	0	1	1	3653	9	0.00246373	426	1	0.613107	1	465	0	0	57	0	1	1	903	3	0.00332226	110	0	1	1	2985	4	0.00134003	393	0	1	1	1
AT1G72550.1	1200	394	0.328333	102	42	0.00012801	0.000669426	1695	8	0.00471976	144	2	0.524681	1	6157	21	0.00341075	531	3	0.116512	1	830	1	0.00120482	100	0	1	1	1203	5	0.00415628	144	0	1	1	4301	8	0.00186003	526	0	1	1	1
AT1G72560.1	1320	646	0.489394	144	85	0	0	2442	8	0.003276	259	1	0.958155	1	7995	23	0.0028768	862	0	1	1	1022	2	0.00195695	140	0	1	1	1809	4	0.00221117	248	0	1	1	5925	11	0.00185654	828	0	1	1	1
AT1G72650.1	692	311	0.449422	82	43	3.9627e-08	3.09326e-07	1644	0	0	170	0	1	1	4467	11	0.0024625	527	1	0.691104	1	721	4	0.00554785	89	0	1	1	1409	0	0	173	0	1	1	4226	10	0.0023663	557	0	1	1	1
AT1G72700.1	1501	613	0.408394	186	98	1.11022e-16	1.90152e-15	2139	9	0.00420757	256	3	0.604169	1	9212	30	0.00325662	1085	2	0.695347	1	1190	3	0.00252101	174	1	0.999999	1	1619	5	0.00308833	250	0	1	1	6851	14	0.0020435	1057	0	1	1	1
AT1G72740.1	388	98	0.252577	53	18	0.0731476	0.254674	783	1	0.00127714	87	0	1	1	2150	3	0.00139535	234	0	1	1	346	0	0	53	0	1	1	646	2	0.00309598	90	0	1	1	1640	5	0.00304878	235	0	1	1	1
AT1G72770.1	739	322	0.435724	92	53	9.85545e-12	1.08804e-10	1115	3	0.00269058	125	1	0.783843	1	3311	8	0.00241619	424	1	0.611379	1	603	1	0.00165837	87	0	1	1	836	1	0.00119617	120	0	1	1	2550	12	0.00470588	409	0	1	1	1
AT1G73020.1	1003	454	0.452642	96	51	1.24802e-09	1.1452e-08	1533	7	0.00456621	135	1	0.808772	1	6226	12	0.0019274	574	0	1	1	775	2	0.00258065	94	0	1	1	1092	2	0.0018315	134	0	1	1	4420	16	0.00361991	571	1	0.537621	1	1
AT1G73080.1	1538	545	0.354356	199	101	8.88178e-16	1.41987e-14	2351	3	0.00127605	297	1	0.973733	1	7046	21	0.00298041	900	2	0.595373	1	1319	10	0.0075815	192	3	0.999977	1	1927	4	0.00207577	284	0	1	1	5636	16	0.00283889	852	0	1	1	1
AT1G73100.1	699	168	0.240343	84	29	0.0228092	0.0872568	1554	1	0.000643501	170	0	1	1	4705	12	0.00255048	566	0	1	1	621	1	0.00161031	80	0	1	1	1296	3	0.00231481	158	0	1	1	3934	12	0.00305033	518	0	1	1	1
AT1G73220.1	1178	226	0.191851	157	51	0.0126004	0.0500833	799	0	0	111	0	1	1	3592	11	0.00306236	457	0	1	1	990	9	0.00909091	152	3	0.999605	1	642	1	0.00155763	104	0	1	1	2870	7	0.00243902	442	0	1	1	1
AT1G73240.1	913	224	0.245345	111	39	0.00684987	0.028383	1003	4	0.00398804	120	0	1	1	3060	12	0.00392157	381	0	1	1	735	2	0.00272109	95	0	1	1	841	0	0	114	0	1	1	2324	4	0.00172117	356	0	1	1	1
AT1G73320.1	750	267	0.356	91	33	0.00720248	0.0297798	691	0	0	82	0	1	1	2235	2	0.000894855	267	0	1	1	530	3	0.00566038	79	0	1	1	442	1	0.00226244	67	0	1	1	1425	1	0.000701754	216	0	1	1	1
AT1G73710.1	1013	225	0.222113	112	35	0.0573056	0.204146	2102	7	0.00333016	225	2	0.760448	1	7552	22	0.00291314	868	1	0.855559	1	845	2	0.00236686	108	0	1	1	1600	3	0.001875	217	0	1	1	5423	16	0.0029504	776	0	1	1	1
AT1G73720.1	748	244	0.326203	68	30	0.00027314	0.00136417	1539	2	0.00129955	138	0	1	1	5312	12	0.00225904	464	1	0.64453	1	542	3	0.00553506	65	1	0.995047	1	1099	0	0	134	0	1	1	3784	9	0.00237844	452	0	1	1	1
AT1G73730.1	592	233	0.393581	71	37	4.20697e-07	2.95863e-06	1163	8	0.00687876	135	1	0.808772	1	3890	9	0.00231362	491	1	0.665294	1	582	1	0.00171821	75	0	1	1	1077	5	0.00464253	139	0	1	1	3777	8	0.00211808	518	0	1	1	1
AT1G73840.1	446	141	0.316143	62	22	0.0320948	0.119382	1049	3	0.00285987	122	0	1	1	2413	5	0.00207211	335	0	1	1	394	0	0	61	0	1	1	787	2	0.0025413	122	0	1	1	1981	7	0.00353357	314	0	1	1	1
AT1G73920.1	1132	246	0.217314	119	40	0.0139782	0.0552667	1454	2	0.00137552	158	0	1	1	5233	5	0.000955475	595	0	1	1	921	2	0.00217155	119	0	1	1	1132	5	0.00441696	153	0	1	1	4269	10	0.00234247	563	0	1	1	1
AT1G73950.1	715	266	0.372028	77	37	5.24267e-06	3.24814e-05	1269	5	0.00394011	125	0	1	1	3933	9	0.00228833	422	0	1	1	585	1	0.0017094	78	0	1	1	970	3	0.00309278	128	0	1	1	3145	5	0.00158983	414	0	1	1	1
AT1G74160.1	1303	470	0.360706	150	67	4.12701e-08	3.21682e-07	2618	6	0.00229183	282	2	0.858676	1	7578	12	0.00158353	865	2	0.573897	1	1074	3	0.0027933	146	1	0.999993	1	2011	7	0.00348086	275	1	0.83499	1	6024	14	0.00232404	847	0	1	1	1
AT1G74210.1	520	195	0.375	54	27	3.92485e-05	0.000218386	869	5	0.00575374	82	3	0.078929	1	3845	5	0.00130039	363	0	1	1	372	0	0	53	0	1	1	604	2	0.00331126	81	1	0.411805	1	2533	9	0.0035531	356	0	1	1	1
AT1G74260.1	1486	789	0.530956	202	139	0	0	2898	8	0.00276052	368	1	0.988996	1	8387	28	0.0033385	1134	0	1	1	1413	9	0.00636943	191	2	0.999997	1	2584	7	0.00270898	353	0	1	1	7289	19	0.00260667	1095	0	1	1	1
AT1G74330.1	1335	329	0.246442	143	46	0.0203653	0.0784517	1223	1	0.000817661	132	0	1	1	5305	14	0.00263902	574	0	1	1	1061	1	0.000942507	154	0	1	1	909	2	0.00220022	139	1	0.597759	1	4065	6	0.00147601	619	0	1	1	1
AT1G74510.1	574	325	0.566202	85	61	0	0	597	2	0.00335008	82	2	0.263754	1	2299	6	0.00260983	331	0	1	1	593	16	0.0269815	94	4	0.942845	1	561	5	0.00891266	92	0	1	1	2166	3	0.00138504	372	0	1	1	1
AT1G74540.1	550	121	0.22	80	26	0.060496	0.214421	725	3	0.00413793	117	3	0.171701	1	2347	8	0.00340861	381	1	0.572285	1	639	6	0.00938967	98	0	1	1	871	2	0.00229621	137	0	1	1	2628	11	0.00418569	443	0	1	1	1
AT1G74580.1	940	339	0.360638	101	44	1.73656e-05	0.000100761	1290	1	0.000775194	130	0	1	1	6006	17	0.0028305	678	1	0.779388	1	748	2	0.0026738	98	0	1	1	996	7	0.00702811	125	1	0.559118	1	4653	12	0.00257898	646	0	1	1	1
AT1G74690.1	651	327	0.502304	84	48	1.35404e-10	1.36116e-09	1315	10	0.00760456	155	4	0.122054	1	4581	5	0.00109146	548	0	1	1	547	0	0	82	0	1	1	1171	4	0.00341588	154	0	1	1	3847	5	0.00129971	539	0	1	1	1
AT1G74750.1	803	485	0.603985	113	80	0	0	1631	10	0.00613121	222	4	0.286338	1	5096	10	0.00196232	704	0	1	1	687	10	0.014556	117	2	0.999223	1	1360	2	0.00147059	224	0	1	1	4143	11	0.00265508	702	0	1	1	1
AT1G74780.1	899	228	0.253615	121	39	0.029727	0.111221	1019	3	0.00294406	132	2	0.478738	1	3323	5	0.00150466	439	0	1	1	640	6	0.009375	106	3	0.991241	1	750	5	0.00666667	123	1	0.553303	1	2376	4	0.0016835	392	0	1	1	1
AT1G74790.1	745	264	0.354362	89	42	2.27024e-06	1.47231e-05	1592	5	0.0031407	180	1	0.889829	1	5557	11	0.00197949	627	0	1	1	578	6	0.0103806	87	1	0.999178	1	1180	0	0	170	0	1	1	3922	8	0.00203978	599	0	1	1	1
AT1G74850.1	1127	353	0.313221	157	59	0.000147548	0.000763613	1414	4	0.00282885	182	1	0.892496	1	5563	21	0.00377494	744	1	0.80957	1	1035	2	0.00193237	170	0	1	1	1137	0	0	181	0	1	1	4298	13	0.00302466	712	0	1	1	1
AT1G75020.1	465	179	0.384946	57	27	0.000128657	0.000672516	865	2	0.00231214	100	1	0.70636	1	2931	4	0.00136472	324	0	1	1	411	1	0.00243309	56	0	1	1	717	12	0.0167364	96	2	0.13043	1	2506	6	0.00239425	315	0	1	1	1
AT1G75210.1	1203	375	0.311721	96	36	0.0027344	0.0120039	1685	6	0.00356083	141	1	0.822328	1	6108	23	0.00376555	548	2	0.34475	1	629	1	0.00158983	89	0	1	1	958	2	0.00208768	135	0	1	1	3475	6	0.00172662	507	0	1	1	1
AT1G75310.1	2040	431	0.211275	207	60	0.0703115	0.246643	3622	10	0.00276091	369	2	0.939675	1	10862	28	0.00257779	1172	2	0.734813	1	1400	1	0.000714286	185	0	1	1	2532	5	0.00197472	323	0	1	1	6907	16	0.00231649	980	0	1	1	1
AT1G75400.1	562	249	0.44306	73	38	3.06296e-07	2.18157e-06	912	1	0.00109649	113	0	1	1	2813	2	0.000710985	388	0	1	1	381	2	0.00524934	66	0	1	1	640	3	0.0046875	104	0	1	1	1966	4	0.00203459	345	0	1	1	1
AT1G75560.1	426	201	0.471831	62	38	6.84575e-10	6.41043e-09	666	2	0.003003	103	1	0.716959	1	1059	6	0.00566572	180	1	0.330513	1	380	0	0	65	0	1	1	581	3	0.00516351	103	1	0.490761	1	977	2	0.00204708	180	0	1	1	1
AT1G75660.1	1351	450	0.333087	154	60	3.93489e-05	0.000218894	2220	9	0.00405405	237	2	0.785099	1	8376	33	0.00393983	927	1	0.873359	1	1067	24	0.022493	146	2	0.999911	1	1715	9	0.00524781	232	2	0.447762	1	6617	15	0.00226689	887	0	1	1	1
AT1G75840.1	473	142	0.300211	42	18	0.0063153	0.0262997	640	2	0.003125	48	0	1	1	1932	5	0.00258799	159	0	1	1	354	0	0	38	0	1	1	433	1	0.00230947	52	0	1	1	1323	3	0.00226757	161	0	1	1	1
AT1G75850.1	1348	388	0.287834	140	49	0.0029451	0.0128747	2003	8	0.00399401	200	2	0.701156	1	6805	19	0.00279206	689	0	1	1	1032	1	0.000968992	139	0	1	1	1592	5	0.0031407	203	0	1	1	5489	12	0.00218619	705	1	0.614183	1	1
AT1G76280.1	1124	307	0.273132	118	43	0.00216929	0.00966544	1908	11	0.0057652	190	2	0.674214	1	6747	15	0.00222321	669	0	1	1	947	4	0.00422386	116	0	1	1	1552	9	0.00579897	185	0	1	1	5565	26	0.00467206	659	1	0.589447	1	1
AT1G76350.1	737	262	0.355495	99	50	1.65871e-08	1.34738e-07	1433	0	0	162	0	1	1	5966	15	0.00251425	763	2	0.506664	1	704	1	0.00142045	96	0	1	1	1130	2	0.00176991	157	1	0.642506	1	4685	9	0.00192102	683	0	1	1	1
AT1G76390.1	1044	308	0.295019	117	50	9.28224e-06	5.59769e-05	1731	6	0.0034662	182	4	0.18297	1	6250	19	0.00304	722	1	0.799998	1	803	14	0.0174346	113	3	0.994453	1	1150	1	0.000869565	173	0	1	1	4629	9	0.00194426	695	0	1	1	1
AT1G76400.1	1085	358	0.329954	108	46	2.29109e-05	0.000131207	1539	8	0.00519818	146	4	0.104036	1	5135	13	0.00253165	545	0	1	1	738	0	0	108	0	1	1	1013	2	0.00197433	141	0	1	1	3760	8	0.00212766	534	0	1	1	1
AT1G76405.1	60	22	0.366667	6	4	0.0340571	0.1259	171	0	0	16	0	1	1	698	3	0.00429799	60	0	1	1	43	0	0	6	0	1	1	121	0	0	16	0	1	1	457	1	0.00218818	60	0	1	1	1
AT1G76510.1	581	248	0.42685	60	30	1.48865e-05	8.71452e-05	1160	2	0.00172414	121	0	1	1	3781	9	0.00238032	431	0	1	1	456	1	0.00219298	60	0	1	1	956	2	0.00209205	123	0	1	1	3050	9	0.00295082	422	0	1	1	1
AT1G76630.1	1423	338	0.237526	131	38	0.125506	0.414847	3509	12	0.00341978	341	1	0.98468	1	10054	37	0.00368013	1002	0	1	1	914	5	0.00547046	126	1	0.999966	1	2448	5	0.00204248	336	1	0.889353	1	7270	12	0.00165062	1001	1	0.741345	1	1
AT1G76710.1	715	257	0.359441	81	43	2.4657e-08	1.96629e-07	908	1	0.00110132	97	0	1	1	4245	14	0.003298	445	0	1	1	573	1	0.0017452	82	0	1	1	681	0	0	98	0	1	1	3161	5	0.00158178	432	0	1	1	1
AT1G76850.1	1593	357	0.224105	165	47	0.123838	0.409983	3137	4	0.0012751	304	1	0.975892	1	9287	19	0.00204587	883	0	1	1	1177	4	0.00339847	157	0	1	1	2282	4	0.00175285	293	0	1	1	6602	21	0.00318085	871	1	0.691688	1	1
AT1G76900.1	653	217	0.332312	101	55	8.17191e-11	8.33003e-10	613	4	0.00652529	90	2	0.299766	1	2104	5	0.00237643	300	0	1	1	755	2	0.00264901	118	0	1	1	590	0	0	95	0	1	1	2214	3	0.00135501	332	0	1	1	1
AT1G76950.1	1426	602	0.42216	176	96	0	0	2743	3	0.00109369	323	0	1	1	7945	21	0.00264317	976	0	1	1	1055	3	0.0028436	170	0	1	1	1979	6	0.00303183	299	0	1	1	5787	10	0.00172801	905	0	1	1	1
AT1G77140.1	982	286	0.291242	97	37	0.00170117	0.00769833	1922	11	0.0057232	172	0	1	1	5131	15	0.00292341	468	0	1	1	762	3	0.00393701	95	0	1	1	1411	5	0.00354359	167	0	1	1	3839	9	0.00234436	450	1	0.455512	1	1
AT1G77220.1	737	267	0.36228	71	30	0.000666292	0.003165	1130	4	0.00353982	101	0	1	1	4611	9	0.00195185	441	0	1	1	535	2	0.00373832	68	1	0.996123	1	824	4	0.00485437	99	0	1	1	3403	7	0.00205701	432	0	1	1	1
AT1G77250.1	546	194	0.355311	54	24	0.000948768	0.00440053	1203	3	0.00249377	116	0	1	1	4498	13	0.00289017	462	0	1	1	454	0	0	57	0	1	1	972	2	0.00205761	121	0	1	1	3844	5	0.00130073	482	0	1	1	1
AT1G77270.1	900	191	0.212222	101	38	0.00198398	0.00888597	1384	5	0.00361272	147	2	0.535732	1	5092	23	0.00451689	573	0	1	1	719	9	0.0125174	88	1	0.999243	1	1026	3	0.00292398	129	0	1	1	3390	6	0.00176991	477	0	1	1	1
AT1G77280.1	1354	448	0.330871	140	62	1.8777e-07	1.36287e-06	1485	5	0.003367	157	1	0.85396	1	6255	12	0.00191847	669	0	1	1	1025	3	0.00292683	132	0	1	1	1101	3	0.0027248	148	0	1	1	4824	15	0.00310945	643	1	0.580477	1	1
AT1G77300.1	1722	1085	0.630081	206	150	0	0	3988	9	0.00225677	438	2	0.97013	1	13973	42	0.0030058	1546	3	0.668671	1	1463	3	0.00205058	208	0	1	1	3061	17	0.00555374	444	1	0.94547	1	9950	19	0.00190955	1507	0	1	1	1
AT1G77310.1	1418	589	0.415374	148	74	1.33442e-11	1.46344e-10	1946	16	0.00822199	199	4	0.22549	1	6229	21	0.00337133	620	0	1	1	1139	19	0.0166813	146	2	0.999911	1	1515	5	0.00330033	194	0	1	1	4670	12	0.00256959	602	1	0.556585	1	1
AT1G77320.1	1129	417	0.369353	128	61	8.43682e-09	7.09589e-08	2484	8	0.00322061	249	0	1	1	8288	19	0.00229247	868	0	1	1	929	3	0.00322928	125	0	1	1	1999	4	0.002001	246	0	1	1	6561	8	0.00121933	862	0	1	1	1
AT1G77460.1	1969	899	0.456577	262	145	0	0	4606	7	0.00151976	602	2	0.994732	1	14365	46	0.00320223	1820	2	0.912432	1	1791	4	0.00223339	274	0	1	1	4030	5	0.00124069	582	0	1	1	11893	27	0.00227024	1770	0	1	1	1
AT1G77550.1	1299	360	0.277136	138	52	0.000325184	0.00161251	1837	4	0.00217746	194	0	1	1	7189	20	0.00278203	761	0	1	1	1006	2	0.00198807	142	0	1	1	1465	3	0.00204778	197	0	1	1	5444	9	0.0016532	772	0	1	1	1
AT1G77580.1	786	348	0.442748	80	43	1.51347e-08	1.23274e-07	1287	14	0.010878	127	2	0.458805	1	4291	26	0.00605919	497	6	0.000978157	0.0378265	632	5	0.00791139	74	0	1	1	1032	1	0.000968992	124	0	1	1	3319	11	0.00331425	491	0	1	1	1
AT1G77590.1	904	304	0.336283	106	47	5.12604e-06	3.18081e-05	1275	11	0.00862745	155	3	0.292792	1	5071	9	0.0017748	627	0	1	1	671	2	0.00298063	95	1	0.999572	1	998	2	0.00200401	149	0	1	1	3901	12	0.00307613	587	0	1	1	1
AT1G77600.1	2347	797	0.339582	215	95	1.50274e-10	1.49592e-09	4248	6	0.00141243	374	0	1	1	13136	43	0.00327345	1166	0	1	1	1821	3	0.00164745	213	0	1	1	3361	9	0.00267777	371	1	0.912027	1	9789	23	0.00234958	1158	0	1	1	1
AT1G77680.1	1486	403	0.271198	168	69	1.25033e-06	8.35019e-06	2058	3	0.00145773	250	1	0.953276	1	7340	8	0.00108992	870	0	1	1	1236	10	0.00809061	171	2	0.999987	1	1852	2	0.00107991	257	0	1	1	6491	17	0.00261901	918	0	1	1	1
AT1G77720.1	1027	226	0.220058	112	43	0.00064934	0.00308998	1887	9	0.00476948	198	0	1	1	6503	13	0.00199908	699	0	1	1	778	0	0	107	0	1	1	1384	4	0.00289017	184	0	1	1	4695	12	0.00255591	640	0	1	1	1
AT1G77800.1	1477	552	0.373731	162	80	4.64428e-12	5.32196e-11	3993	14	0.00350614	409	3	0.875315	1	11633	43	0.00369638	1219	1	0.933948	1	1065	2	0.00187793	150	0	1	1	2923	9	0.00307903	400	0	1	1	8025	21	0.00261682	1131	0	1	1	1
AT1G77810.1	732	209	0.285519	60	22	0.0219857	0.0842543	1086	5	0.00460405	88	0	1	1	3809	13	0.00341297	348	2	0.182115	1	546	1	0.0018315	62	0	1	1	753	1	0.00132802	88	0	1	1	2668	8	0.0029985	361	0	1	1	1
AT1G77930.1	877	255	0.290764	62	27	0.000692987	0.00328174	914	3	0.00328228	56	0	1	1	2992	10	0.00334225	209	0	1	1	856	1	0.00116822	64	0	1	1	841	2	0.00237812	57	0	1	1	2747	7	0.00254823	225	0	1	1	1
AT1G78280.1	1540	514	0.333766	165	67	2.82963e-06	1.81166e-05	2120	9	0.00424528	218	2	0.744961	1	8290	17	0.00205066	825	1	0.841028	1	1231	3	0.00243704	156	0	1	1	1568	4	0.00255102	208	0	1	1	5959	10	0.00167813	781	0	1	1	1
AT1G78510.1	908	273	0.300661	94	41	3.19042e-05	0.000179161	1131	5	0.00442087	116	1	0.75864	1	3428	9	0.00262544	350	0	1	1	696	0	0	93	0	1	1	842	3	0.00356295	114	0	1	1	2337	5	0.0021395	320	0	1	1	1
AT1G78540.1	715	376	0.525874	86	57	2.22045e-16	3.68852e-15	1219	6	0.00492207	125	2	0.450707	1	5394	20	0.00370782	571	0	1	1	750	2	0.00266667	94	0	1	1	1086	4	0.00368324	134	0	1	1	5007	6	0.00119832	619	0	1	1	1
AT1G78570.1	859	165	0.192084	115	37	0.0344031	0.12713	1240	0	0	157	0	1	1	4868	8	0.00164339	616	0	1	1	758	0	0	108	0	1	1	998	0	0	152	0	1	1	3796	11	0.00289779	575	0	1	1	1
AT1G78880.1	640	364	0.56875	79	53	1.22125e-15	1.93428e-14	1010	2	0.0019802	130	1	0.796689	1	3215	8	0.00248834	416	0	1	1	660	7	0.0106061	82	2	0.990141	1	1010	1	0.000990099	132	0	1	1	3154	8	0.00253646	428	0	1	1	1
AT1G78915.1	842	239	0.283848	74	28	0.00662145	0.0274745	1433	3	0.00209351	118	0	1	1	3595	14	0.0038943	322	1	0.512166	1	546	1	0.0018315	70	0	1	1	894	0	0	112	0	1	1	2483	3	0.00120822	316	0	1	1	1
AT1G78920.1	1105	655	0.59276	134	98	0	0	1941	8	0.00412159	224	2	0.758287	1	6014	15	0.00249418	731	2	0.484187	1	904	2	0.00221239	135	0	1	1	1482	4	0.00269906	222	0	1	1	4806	9	0.00187266	727	0	1	1	1
AT1G78940.1	1163	333	0.286328	118	48	6.37271e-05	0.0003459	1875	6	0.0032	195	1	0.908327	1	5154	12	0.00232829	540	0	1	1	856	0	0	116	0	1	1	1412	6	0.00424929	200	1	0.730278	1	3947	3	0.000760071	553	0	1	1	1
AT1G78955.1	1497	271	0.181029	144	43	0.0748447	0.2603	1744	8	0.00458716	175	1	0.882868	1	7203	26	0.00360961	713	1	0.795945	1	1056	2	0.00189394	130	0	1	1	1268	6	0.00473186	169	0	1	1	5192	10	0.00192604	680	0	1	1	1
AT1G79000.1	1790	1183	0.660894	238	177	0	0	4503	18	0.00399734	535	2	0.9892	1	11609	41	0.00353174	1427	4	0.392495	1	1624	1	0.000615764	240	0	1	1	3582	3	0.000837521	530	0	1	1	9448	19	0.00201101	1418	0	1	1	1
AT1G79010.1	508	137	0.269685	52	18	0.0618916	0.218931	723	1	0.00138313	71	0	1	1	1890	5	0.0026455	201	0	1	1	398	2	0.00502513	52	0	1	1	558	2	0.00358423	71	0	1	1	1595	3	0.00188088	201	0	1	1	1
AT1G79030.1	750	412	0.549333	81	55	2.22045e-16	3.68852e-15	922	5	0.00542299	95	1	0.687806	1	4881	6	0.00122926	529	0	1	1	646	9	0.0139319	81	2	0.989417	1	784	1	0.00127551	96	0	1	1	3804	11	0.00289169	514	0	1	1	1
AT1G79050.1	806	279	0.346154	93	33	0.0103403	0.0417078	913	0	0	98	0	1	1	3302	6	0.00181708	367	0	1	1	769	15	0.0195059	98	2	0.996875	1	786	1	0.00127226	101	0	1	1	2914	8	0.00274537	370	0	1	1	1
AT1G79190.1	2038	963	0.472522	247	146	0	0	3190	10	0.0031348	359	1	0.987713	1	9301	24	0.00258037	1076	1	0.90915	1	1822	2	0.00109769	251	1	1	1	2655	8	0.00301318	358	1	0.904206	1	7805	14	0.00179372	1042	1	0.755282	1	1
AT1G79200.1	349	120	0.34384	42	20	0.000859203	0.00402322	238	1	0.00420168	28	0	1	1	1093	4	0.00365965	125	0	1	1	365	3	0.00821918	43	0	1	1	252	0	0	29	0	1	1	1162	1	0.000860585	135	0	1	1	1
AT1G79280.1	3027	1017	0.335976	335	144	5.39568e-14	7.40475e-13	6279	23	0.003663	645	5	0.893244	1	16947	48	0.00283236	1800	2	0.909247	1	2471	13	0.00526103	324	3	1	1	4680	11	0.00235043	605	0	1	1	12405	23	0.00185409	1685	0	1	1	1
AT1G79380.1	1101	317	0.28792	119	56	5.81472e-08	4.44001e-07	803	3	0.00373599	91	0	1	1	2886	9	0.0031185	326	1	0.516496	1	862	5	0.00580046	120	2	0.999378	1	677	4	0.00590842	95	0	1	1	2157	3	0.00139082	317	0	1	1	1
AT1G79440.1	894	215	0.240492	96	29	0.111122	0.371964	1328	2	0.00150602	134	1	0.806414	1	4958	14	0.00282372	514	2	0.317284	1	598	1	0.00167224	90	0	1	1	853	0	0	124	0	1	1	3331	5	0.00150105	501	0	1	1	1
AT1G79490.1	1136	476	0.419014	145	69	1.00726e-09	9.31571e-09	1540	3	0.00194805	189	0	1	1	5650	15	0.00265487	709	1	0.794118	1	1112	2	0.00179856	138	0	1	1	1519	2	0.00131666	184	1	0.700468	1	5383	7	0.00130039	683	0	1	1	1
AT1G79530.1	567	217	0.382716	71	38	1.18412e-07	8.74265e-07	848	2	0.00235849	92	1	0.676115	1	4106	15	0.00365319	416	1	0.604386	1	503	2	0.00397614	70	1	0.996707	1	714	3	0.00420168	89	0	1	1	3248	4	0.00123153	413	0	1	1	1
AT1G79540.1	1405	339	0.241281	159	56	0.00132998	0.00608341	1499	10	0.00667111	168	2	0.608026	1	5201	15	0.00288406	622	0	1	1	1134	3	0.0026455	159	0	1	1	1149	3	0.00261097	167	1	0.665177	1	4068	8	0.00196657	618	0	1	1	1
AT1G79560.1	1567	691	0.44097	177	92	2.22045e-15	3.42751e-14	2299	8	0.00347977	242	1	0.948464	1	8287	29	0.00349946	901	1	0.865803	1	1556	6	0.00385604	179	0	1	1	2054	1	0.000486855	241	0	1	1	7641	13	0.00170135	906	0	1	1	1
AT1G79570.1	1407	763	0.542289	175	111	0	0	2969	8	0.00269451	362	2	0.935294	1	9232	28	0.00303293	1096	2	0.700594	1	1125	3	0.00266667	163	1	0.999998	1	2277	4	0.0017567	345	0	1	1	6909	22	0.00318425	1054	1	0.759217	1	1
AT1G79590.1	379	193	0.509235	42	26	2.53878e-07	1.82229e-06	545	3	0.00550459	59	1	0.514699	1	2009	6	0.00298656	218	0	1	1	373	1	0.00268097	42	0	1	1	509	0	0	59	0	1	1	1808	6	0.00331858	218	0	1	1	1
AT1G79600.1	918	255	0.277778	139	48	0.00434505	0.0185091	1289	0	0	181	0	1	1	4579	5	0.00109194	642	1	0.760954	1	818	1	0.00122249	129	1	0.999973	1	1162	2	0.00172117	174	0	1	1	3956	6	0.00151668	618	0	1	1	1
AT1G79720.1	538	129	0.239777	60	22	0.0219857	0.0842543	1036	7	0.00675676	114	1	0.752651	1	3773	17	0.0045057	417	0	1	1	442	7	0.0158371	56	1	0.989672	1	822	1	0.00121655	106	0	1	1	3161	8	0.00253084	392	0	1	1	1
AT1G79730.1	650	232	0.356923	82	36	7.97684e-05	0.000427203	977	5	0.00511771	99	0	1	1	4039	14	0.0034662	450	0	1	1	617	3	0.00486224	88	0	1	1	648	3	0.00462963	98	0	1	1	2977	5	0.00167954	432	0	1	1	1
AT1G79830.1	1230	577	0.469106	141	73	2.07478e-12	2.45976e-11	2741	15	0.00547246	302	4	0.502143	1	7426	28	0.00377054	840	0	1	1	1062	2	0.00188324	138	0	1	1	2215	4	0.00180587	290	0	1	1	5929	14	0.00236128	822	0	1	1	1
AT1G79950.1	1588	621	0.391058	187	82	3.9636e-09	3.4541e-08	2543	9	0.00353913	275	3	0.652004	1	8050	28	0.00347826	917	1	0.870505	1	1277	1	0.000783085	171	0	1	1	1887	5	0.00264971	245	0	1	1	6521	15	0.00230026	837	0	1	1	1
AT1G79990.1	1284	510	0.397196	126	61	3.94532e-09	3.43879e-08	2357	6	0.00254561	231	2	0.773066	1	8503	19	0.00223451	840	0	1	1	957	14	0.014629	124	3	0.997327	1	1635	2	0.00122324	218	0	1	1	6197	15	0.00242053	815	0	1	1	1
AT1G80010.1	1012	257	0.253953	157	60	7.54068e-05	0.00040611	1029	4	0.00388727	163	2	0.591623	1	3766	11	0.00292087	614	3	0.158455	1	952	1	0.00105042	156	0	1	1	938	3	0.00319829	149	0	1	1	3670	13	0.00354223	599	0	1	1	1
AT1G80030.1	862	285	0.330626	108	43	0.000261464	0.00131296	1322	3	0.00226929	144	0	1	1	3818	10	0.00261917	416	0	1	1	656	1	0.00152439	97	0	1	1	961	1	0.00104058	137	0	1	1	2792	6	0.002149	395	0	1	1	1
AT1G80210.1	826	191	0.231235	92	35	0.00234997	0.0103961	1127	2	0.00177462	126	0	1	1	3093	2	0.000646621	348	0	1	1	609	1	0.00164204	86	0	1	1	809	0	0	114	0	1	1	2242	7	0.00312221	333	0	1	1	1
AT1G80260.1	1232	473	0.383929	128	58	1.76246e-07	1.28349e-06	2567	8	0.00311648	264	1	0.960642	1	8746	32	0.00365882	896	0	1	1	919	0	0	120	0	1	1	1909	3	0.0015715	252	0	1	1	6141	21	0.00341964	841	0	1	1	1
AT1G80350.1	707	162	0.229137	96	35	0.00524313	0.0220799	962	1	0.0010395	114	1	0.752651	1	3640	13	0.00357143	480	1	0.656985	1	647	1	0.0015456	94	0	1	1	806	2	0.00248139	123	0	1	1	2992	6	0.00200535	483	0	1	1	1
AT1G80410.1	1136	540	0.475352	110	64	3.88578e-14	5.36949e-13	2697	11	0.00407861	234	0	1	1	9215	31	0.00336408	803	1	0.833038	1	996	16	0.0160643	113	2	0.998956	1	2129	9	0.00422734	242	0	1	1	6994	19	0.00271661	807	0	1	1	1
AT1G80490.1	1775	949	0.534648	215	140	0	0	2507	8	0.00319107	284	1	0.969197	1	8911	29	0.0032544	1021	1	0.8973	1	1558	16	0.0102696	205	4	0.999944	1	2037	10	0.00490918	281	0	1	1	7354	22	0.00299157	986	1	0.736051	1	1
AT1G80670.1	504	201	0.39881	48	24	0.000104054	0.000550081	1250	5	0.004	113	0	1	1	3632	10	0.0027533	330	0	1	1	402	0	0	48	0	1	1	975	1	0.00102564	113	0	1	1	2792	6	0.002149	330	0	1	1	1
AT1G80680.1	1435	690	0.480836	146	84	0	0	2948	16	0.00542741	286	1	0.969943	1	9047	31	0.00342655	901	1	0.865803	1	1168	3	0.00256849	140	0	1	1	2264	18	0.00795053	274	5	0.035124	1	6630	21	0.00316742	854	1	0.684526	1	1
AT1G80910.1	1121	340	0.303301	97	40	0.000176084	0.000904759	1407	12	0.00852878	110	2	0.38791	1	5333	15	0.00281268	463	0	1	1	831	7	0.00842359	97	1	0.999637	1	923	3	0.00325027	111	0	1	1	3772	11	0.00291622	463	0	1	1	1
AT2G01130.1	1409	701	0.497516	169	102	0	0	2718	17	0.0062546	292	7	0.0685179	1	9142	43	0.00470357	965	2	0.633073	1	1395	6	0.00430108	170	0	1	1	2262	6	0.00265252	290	0	1	1	8028	12	0.00149477	958	0	1	1	1
AT2G01270.1	777	345	0.444015	101	53	1.0738e-09	9.90061e-09	1091	0	0	129	0	1	1	3376	6	0.00177725	426	1	0.613107	1	828	3	0.00362319	99	0	1	1	1026	2	0.00194932	126	0	1	1	3345	7	0.00209268	425	0	1	1	1
AT2G01320.1	1234	431	0.349271	159	71	1.68628e-08	1.36884e-07	1804	8	0.00443459	235	1	0.943848	1	5009	22	0.00439209	642	5	0.0153309	0.498472	1066	7	0.0065666	144	1	0.999992	1	1608	3	0.00186567	224	0	1	1	4514	16	0.00354453	619	0	1	1	1
AT2G01350.1	694	173	0.24928	69	27	0.00448418	0.0190612	759	0	0	74	0	1	1	3168	4	0.00126263	324	0	1	1	617	2	0.00324149	70	0	1	1	637	2	0.00313972	74	0	1	1	2530	2	0.000790514	324	0	1	1	1
AT2G01440.1	1314	464	0.35312	138	63	3.79103e-08	2.96698e-07	2414	9	0.00372825	253	1	0.954963	1	8166	21	0.00257164	847	1	0.848636	1	1162	1	0.000860585	140	0	1	1	2100	6	0.00285714	249	1	0.804345	1	6815	9	0.00132062	834	0	1	1	1
AT2G01450.1	840	258	0.307143	95	44	2.47599e-06	1.59647e-05	1054	6	0.0056926	117	4	0.0554603	1	4052	18	0.00444225	449	2	0.264154	1	688	15	0.0218023	94	2	0.995826	1	780	1	0.00128205	111	0	1	1	3050	3	0.000983607	428	0	1	1	1
AT2G01460.1	1567	641	0.409062	157	89	0	0	2168	10	0.00461255	229	0	1	1	8026	21	0.0026165	834	0	1	1	1258	8	0.0063593	155	0	1	1	1714	3	0.00175029	227	0	1	1	6352	19	0.00299118	822	0	1	1	1
AT2G01480.1	1082	346	0.319778	135	48	0.00224961	0.0099936	1056	1	0.00094697	116	1	0.75864	1	4327	16	0.00369771	463	0	1	1	986	1	0.0010142	130	0	1	1	985	2	0.00203046	118	0	1	1	3380	7	0.00207101	433	0	1	1	1
AT2G01630.1	603	211	0.349917	100	51	7.84155e-09	6.62658e-08	627	4	0.00637959	110	1	0.740225	1	2093	2	0.000955566	328	0	1	1	694	2	0.00288184	107	0	1	1	660	2	0.0030303	111	0	1	1	2221	2	0.000900495	362	0	1	1	1
AT2G01680.1	1053	342	0.324786	148	83	2.22045e-16	3.68852e-15	911	3	0.00329308	129	2	0.466832	1	2598	9	0.0034642	395	1	0.585427	1	970	1	0.00103093	161	1	0.999998	1	860	2	0.00232558	138	1	0.595114	1	2524	6	0.00237718	425	0	1	1	1
AT2G01690.1	1221	632	0.517609	131	80	0	0	1786	4	0.00223964	178	1	0.887095	1	6036	13	0.00215374	625	0	1	1	1109	2	0.00180343	130	0	1	1	1546	7	0.00452781	185	0	1	1	5401	12	0.00222181	640	0	1	1	1
AT2G01730.1	957	248	0.259143	93	36	0.00144125	0.00657605	1562	2	0.00128041	144	0	1	1	5589	16	0.00286277	538	0	1	1	720	3	0.00416667	96	0	1	1	1206	2	0.00165837	149	0	1	1	4376	6	0.00137112	558	0	1	1	1
AT2G01740.1	718	293	0.408078	88	50	7.47962e-11	7.64058e-10	894	2	0.00223714	108	2	0.379288	1	3686	7	0.00189908	475	0	1	1	712	1	0.00140449	83	0	1	1	930	3	0.00322581	105	0	1	1	3598	11	0.00305725	452	1	0.456981	1	1
AT2G01750.1	1001	361	0.360639	109	46	3.03395e-05	0.000171357	1558	7	0.00449294	159	2	0.578135	1	4948	17	0.00343573	532	1	0.694528	1	907	5	0.00551268	107	0	1	1	1233	2	0.00162206	154	0	1	1	4185	3	0.000716846	537	0	1	1	1
AT2G01820.1	1478	462	0.312585	198	98	1.68754e-14	2.4262e-13	1739	3	0.00172513	222	1	0.934151	1	5385	10	0.00185701	704	0	1	1	1515	20	0.0132013	220	2	1	1	1645	11	0.00668693	232	0	1	1	4890	18	0.00368098	717	0	1	1	1
AT2G01830.1	1613	792	0.491011	203	126	0	0	1967	2	0.00101678	235	0	1	1	7215	12	0.0016632	878	1	0.858743	1	1389	4	0.00287977	199	0	1	1	1663	6	0.00360794	233	0	1	1	5848	11	0.00188098	865	0	1	1	1
AT2G01860.1	709	147	0.207334	77	30	0.00306388	0.013383	881	5	0.00567537	89	0	1	1	3681	9	0.00244499	398	0	1	1	554	1	0.00180505	78	0	1	1	719	0	0	90	0	1	1	3024	11	0.00363757	403	1	0.41982	1	1
AT2G01970.1	765	301	0.393464	104	56	9.93033e-11	1.00669e-09	978	10	0.0102249	138	5	0.0275288	0.697537	3318	7	0.0021097	463	1	0.643737	1	761	3	0.00394218	114	0	1	1	934	3	0.00321199	144	0	1	1	3124	8	0.00256082	520	0	1	1	1
AT2G01980.1	2083	748	0.359097	222	93	6.42361e-09	5.46878e-08	2510	4	0.00159363	248	1	0.952117	1	9199	18	0.00195673	972	0	1	1	1883	11	0.00584174	227	1	1	1	2014	2	0.000993049	248	0	1	1	7650	12	0.00156863	957	0	1	1	1
AT2G02040.1	790	209	0.264557	121	53	2.09442e-06	1.36179e-05	1024	0	0	154	0	1	1	3163	6	0.00189693	458	0	1	1	788	0	0	126	0	1	1	994	4	0.00402414	158	0	1	1	3261	6	0.00183993	484	0	1	1	1
AT2G02090.1	1780	693	0.389326	198	100	1.77636e-15	2.75709e-14	1580	7	0.00443038	166	1	0.86921	1	5525	24	0.00434389	596	3	0.148993	1	1624	1	0.000615764	192	0	1	1	1284	4	0.00311526	161	0	1	1	4275	12	0.00280702	533	0	1	1	1
AT2G02148.1	911	273	0.299671	81	32	0.00174802	0.00789249	862	2	0.00232019	84	1	0.642756	1	3678	10	0.00271887	392	0	1	1	670	2	0.00298507	82	0	1	1	674	0	0	84	0	1	1	2671	3	0.00112317	394	0	1	1	1
AT2G02150.1	1041	267	0.256484	100	40	0.000375403	0.00184306	1143	2	0.00174978	117	0	1	1	4853	13	0.00267876	605	0	1	1	841	35	0.0416171	100	6	0.804984	1	952	0	0	115	0	1	1	4335	9	0.00207612	599	0	1	1	1
AT2G02160.1	724	307	0.424033	102	60	1.21902e-13	1.62191e-12	950	1	0.00105263	157	1	0.85396	1	2375	7	0.00294737	404	0	1	1	748	2	0.0026738	96	0	1	1	1098	6	0.00546448	148	0	1	1	2712	6	0.00221239	405	0	1	1	1
AT2G02170.1	710	349	0.491549	87	60	0	0	938	3	0.00319829	109	0	1	1	3165	12	0.00379147	424	0	1	1	589	0	0	78	0	1	1	746	2	0.00268097	98	0	1	1	2524	5	0.00198098	348	0	1	1	1
AT2G02220.1	1897	516	0.272008	271	109	5.38919e-09	4.62174e-08	1336	4	0.00299401	190	2	0.674214	1	5337	10	0.00187371	763	0	1	1	1929	12	0.00622084	276	3	1	1	1302	0	0	196	0	1	1	5386	8	0.00148533	797	0	1	1	1
AT2G02370.1	640	212	0.33125	61	29	6.76316e-05	0.000366333	625	0	0	66	0	1	1	2598	4	0.00153965	254	0	1	1	496	3	0.00604839	68	0	1	1	475	1	0.00210526	69	0	1	1	1959	3	0.00153139	273	0	1	1	1
AT2G02470.1	423	110	0.260047	45	20	0.00245232	0.0107972	550	3	0.00545455	57	0	1	1	2269	4	0.00176289	238	0	1	1	251	0	0	39	0	1	1	295	1	0.00338983	49	0	1	1	1195	3	0.00251046	198	0	1	1	1
AT2G02480.1	1891	704	0.37229	210	101	7.01661e-14	9.50153e-13	2486	10	0.00402253	267	0	1	1	8054	30	0.00372486	927	1	0.873359	1	1522	4	0.00262812	204	1	1	1	1973	4	0.00202737	252	0	1	1	6382	14	0.00219367	842	0	1	1	1
AT2G02560.1	1703	1023	0.600705	174	122	0	0	3436	8	0.00232829	338	0	1	1	10550	26	0.00246445	1028	1	0.89889	1	1339	3	0.00224048	176	0	1	1	2613	5	0.00191351	339	0	1	1	7824	14	0.00178937	1027	0	1	1	1
AT2G02570.1	339	179	0.528024	35	23	2.60551e-07	1.86434e-06	655	6	0.00916031	66	1	0.554592	1	2720	3	0.00110294	292	0	1	1	284	0	0	36	0	1	1	531	2	0.00376648	66	1	0.351063	1	2218	0	0	290	0	1	1	1
AT2G02750.1	757	196	0.258917	100	35	0.0106819	0.0429919	1002	4	0.00399202	130	2	0.470819	1	3578	7	0.0019564	481	1	0.657749	1	605	2	0.00330579	97	0	1	1	923	3	0.00325027	131	0	1	1	3057	8	0.00261694	506	0	1	1	1
AT2G02790.1	675	244	0.361481	83	40	2.01948e-06	1.3152e-05	1374	11	0.00800582	161	2	0.58492	1	4333	9	0.00207708	540	1	0.699927	1	691	16	0.0231548	78	2	0.986916	1	1233	3	0.00243309	146	0	1	1	3481	7	0.00201092	480	0	1	1	1
AT2G02860.1	884	289	0.326923	107	41	0.000894316	0.00417826	1456	10	0.00686813	166	2	0.601526	1	5037	18	0.00357356	521	2	0.322964	1	795	11	0.0138365	106	2	0.998255	1	1260	3	0.00238095	165	0	1	1	3950	4	0.00101266	521	0	1	1	1
AT2G02870.1	638	210	0.329154	84	42	3.20147e-07	2.27482e-06	817	0	0	105	0	1	1	3058	15	0.00490517	400	0	1	1	481	1	0.002079	78	0	1	1	632	1	0.00158228	99	0	1	1	2012	3	0.00149105	350	0	1	1	1
AT2G02960.1	478	133	0.278243	57	22	0.0116379	0.0465546	778	0	0	95	0	1	1	1760	4	0.00227273	216	0	1	1	472	2	0.00423729	58	0	1	1	680	0	0	90	0	1	1	1456	3	0.00206044	199	0	1	1	1
AT2G03140.1	2207	730	0.330766	259	106	2.8266e-09	2.48673e-08	3918	13	0.00331802	453	3	0.913992	1	12640	28	0.00221519	1524	1	0.966533	1	1850	3	0.00162162	259	1	1	1	3230	6	0.00185759	448	0	1	1	10640	19	0.00178571	1529	1	0.873251	1	1
AT2G03150.1	1746	817	0.467927	205	128	0	0	3289	5	0.00152022	354	1	0.986936	1	8605	25	0.00290529	972	0	1	1	1599	7	0.00437774	205	0	1	1	2810	4	0.00142349	335	0	1	1	7079	11	0.00155389	890	0	1	1	1
AT2G03220.1	919	243	0.264418	116	49	1.65409e-05	9.63719e-05	824	1	0.00121359	99	1	0.702739	1	3734	11	0.0029459	458	0	1	1	893	22	0.0246361	116	4	0.983434	1	735	1	0.00136054	94	0	1	1	3569	8	0.00224152	447	0	1	1	1
AT2G03240.1	1685	461	0.273591	197	76	6.22572e-06	3.83344e-05	1451	4	0.00275672	164	1	0.865965	1	5456	16	0.00293255	646	0	1	1	1429	0	0	191	0	1	1	1170	3	0.0025641	162	0	1	1	4510	13	0.00288248	643	0	1	1	1
AT2G03270.1	740	348	0.47027	93	57	4.09672e-14	5.65609e-13	995	4	0.0040201	119	1	0.767351	1	4902	10	0.00203998	582	0	1	1	690	5	0.00724638	95	2	0.996117	1	894	3	0.0033557	118	1	0.538427	1	4215	11	0.00260973	583	0	1	1	1
AT2G03390.1	519	160	0.308285	53	25	0.000245205	0.00123441	802	0	0	85	0	1	1	2636	6	0.00227618	288	0	1	1	505	2	0.0039604	54	0	1	1	745	2	0.00268456	85	0	1	1	2170	11	0.00506912	290	0	1	1	1
AT2G03480.1	784	415	0.529337	108	76	0	0	1114	1	0.000897666	126	0	1	1	4826	16	0.00331538	545	0	1	1	748	1	0.0013369	106	0	1	1	905	0	0	125	0	1	1	3823	3	0.000784724	546	0	1	1	1
AT2G03510.1	568	157	0.276408	63	21	0.0672568	0.236567	870	1	0.00114943	81	1	0.629378	1	3601	13	0.00361011	316	1	0.505597	1	474	0	0	62	0	1	1	652	0	0	80	0	1	1	2426	6	0.00247321	303	0	1	1	1
AT2G03640.1	617	324	0.525122	67	46	2.42029e-14	3.43036e-13	942	3	0.00318471	95	1	0.687806	1	3536	8	0.00226244	372	0	1	1	475	1	0.00210526	67	0	1	1	678	2	0.00294985	96	0	1	1	2650	6	0.00226415	370	0	1	1	1
AT2G03667.1	1089	375	0.344353	112	56	3.81026e-09	3.32228e-08	1431	6	0.00419287	146	2	0.532068	1	5202	23	0.00442138	533	0	1	1	894	4	0.00447427	112	0	1	1	1169	4	0.00342173	144	0	1	1	4161	12	0.00288392	529	0	1	1	1
AT2G03670.1	1093	483	0.441903	148	94	0	0	1148	1	0.00087108	140	0	1	1	4552	14	0.00307557	516	2	0.318908	1	869	2	0.0023015	138	0	1	1	870	1	0.00114943	132	0	1	1	3484	7	0.00200918	507	0	1	1	1
AT2G03730.1	613	248	0.404568	83	52	1.48548e-13	1.95689e-12	990	5	0.00505051	120	0	1	1	3236	9	0.00278121	379	0	1	1	597	2	0.00335008	80	0	1	1	845	3	0.0035503	113	1	0.523056	1	2618	5	0.00190985	359	0	1	1	1
AT2G03780.1	548	171	0.312044	53	22	0.00429753	0.0183148	635	0	0	62	0	1	1	2530	12	0.00474308	250	0	1	1	405	1	0.00246914	53	0	1	1	459	1	0.00217865	60	0	1	1	1935	5	0.00258398	251	0	1	1	1
AT2G03820.1	552	216	0.391304	71	36	1.41585e-06	9.41631e-06	1081	4	0.00370028	138	1	0.815674	1	3627	8	0.00220568	457	0	1	1	476	5	0.0105042	69	1	0.996427	1	922	3	0.0032538	135	0	1	1	2867	8	0.00279037	440	0	1	1	1
AT2G03870.1	236	168	0.711864	26	24	3.45501e-13	4.40397e-12	275	3	0.0109091	28	0	1	1	989	5	0.00505561	86	1	0.17445	1	223	1	0.0044843	26	0	1	1	244	0	0	28	0	1	1	730	0	0	86	0	1	1	1
AT2G03890.1	592	128	0.216216	98	39	0.000497523	0.0023987	936	3	0.00320513	143	2	0.520958	1	3466	16	0.00461627	559	0	1	1	663	1	0.0015083	100	0	1	1	921	1	0.00108578	135	1	0.587078	1	3456	3	0.000868056	550	0	1	1	1
AT2G04030.1	1158	397	0.342832	126	53	8.87941e-06	5.3669e-05	1638	5	0.0030525	167	0	1	1	6690	12	0.00179372	725	1	0.801331	1	1009	3	0.00297324	126	0	1	1	1272	3	0.00235849	163	0	1	1	5556	10	0.00179986	717	0	1	1	1
AT2G04235.1	1648	533	0.323422	200	79	1.43442e-06	9.53717e-06	2775	5	0.0018018	315	3	0.738726	1	8676	13	0.00149839	947	0	1	1	1342	2	0.00149031	195	0	1	1	2167	3	0.0013844	310	0	1	1	6460	14	0.00216718	943	0	1	1	1
AT2G04270.1	1345	577	0.428996	154	88	0	0	2376	12	0.00505051	261	1	0.959168	1	7342	14	0.00190684	859	0	1	1	1140	0	0	156	0	1	1	1836	2	0.00108932	261	0	1	1	6229	9	0.00144485	878	0	1	1	1
AT2G04305.1	495	173	0.349495	59	29	3.10502e-05	0.000174878	613	2	0.00326264	75	1	0.601102	1	3185	9	0.00282575	391	0	1	1	449	0	0	64	0	1	1	619	0	0	82	0	1	1	2979	10	0.00335683	402	0	1	1	1
AT2G04350.1	955	527	0.551832	121	82	0	0	1272	5	0.00393082	160	2	0.581538	1	4654	15	0.00322303	606	2	0.390693	1	949	1	0.00105374	128	0	1	1	1282	2	0.00156006	166	0	1	1	4498	4	0.000889284	633	0	1	1	1
AT2G04560.1	772	268	0.34715	88	40	1.21592e-05	7.20316e-05	854	4	0.00468384	100	1	0.70636	1	3450	7	0.00202899	417	0	1	1	602	265	0.440199	86	42	0	0	654	4	0.00611621	98	0	1	1	2810	6	0.00213523	405	0	1	1	1
AT2G04620.1	894	186	0.208054	101	39	0.000991628	0.00459089	1334	6	0.00449775	142	0	1	1	4758	19	0.00399327	593	0	1	1	710	176	0.247887	99	38	0	0	1025	3	0.00292683	141	0	1	1	3841	8	0.00208279	577	0	1	1	1
AT2G04650.1	687	291	0.423581	64	34	6.79472e-07	4.67774e-06	1117	0	0	95	0	1	1	4059	8	0.00197093	344	0	1	1	522	200	0.383142	64	28	7.32747e-15	1.06752e-13	852	7	0.00821596	93	1	0.456279	1	2824	10	0.00354108	329	0	1	1	1
AT2G04660.1	957	527	0.550679	105	70	0	0	2141	12	0.00560486	212	2	0.73101	1	7447	22	0.00295421	757	0	1	1	811	493	0.607891	103	70	0	0	1690	64	0.0378698	208	12	1.83029e-08	9.13719e-07	5843	11	0.00188259	739	2	0.263376	1	1
AT2G04690.1	330	151	0.457576	35	18	0.00048348	0.00234016	332	1	0.00301205	33	0	1	1	1809	2	0.00110558	183	0	1	1	257	101	0.392996	33	15	6.86271e-09	7.36881e-08	249	1	0.00401606	31	0	1	1	1488	1	0.000672043	182	0	1	1	1
AT2G04740.1	894	325	0.363535	108	47	9.46994e-06	5.69728e-05	1124	4	0.00355872	132	0	1	1	4149	10	0.00241022	483	0	1	1	636	260	0.408805	104	43	0	0	909	17	0.0187019	127	5	0.00156195	0.0610715	3404	14	0.00411281	478	1	0.475723	1	1
AT2G04842.1	957	405	0.423197	106	62	6.90559e-14	9.36704e-13	1152	4	0.00347222	137	1	0.813402	1	3984	12	0.00301205	499	0	1	1	693	394	0.568543	107	71	0	0	855	8	0.00935673	136	0	1	1	3238	11	0.00339716	533	0	1	1	1
AT2G04850.1	545	184	0.337615	88	49	3.02937e-10	2.92344e-09	446	1	0.00224215	78	0	1	1	1745	5	0.00286533	291	0	1	1	611	318	0.520458	87	58	0	0	547	10	0.0182815	75	2	0.0866162	1	1462	7	0.00478796	247	0	1	1	1
AT2G04860.1	654	288	0.440367	79	44	2.36644e-09	2.12078e-08	1092	3	0.00274725	131	0	1	1	4267	12	0.00281228	560	1	0.713011	1	604	276	0.456954	81	45	0	0	874	3	0.00343249	129	0	1	1	3689	15	0.00406614	576	0	1	1	1
AT2G04865.1	603	340	0.563847	88	59	0	0	954	2	0.00209644	130	1	0.796689	1	4078	7	0.00171653	572	1	0.720586	1	652	405	0.621166	84	55	0	0	921	3	0.00325733	131	0	1	1	3687	9	0.00244101	560	0	1	1	1
AT2G04880.1	559	398	0.711986	73	59	0	0	978	2	0.00204499	121	1	0.772984	1	3015	10	0.00331675	404	0	1	1	432	301	0.696759	70	53	0	0	773	2	0.00258732	123	1	0.553303	1	2475	5	0.0020202	396	0	1	1	1
AT2G04890.1	319	206	0.645768	47	37	6.43929e-15	9.6511e-14	575	2	0.00347826	75	2	0.23224	1	2670	12	0.00449438	374	2	0.202963	1	321	260	0.809969	56	47	0	0	389	3	0.00771208	72	0	1	1	1969	1	0.000507872	371	0	1	1	1
AT2G04940.1	693	279	0.402597	69	35	1.94923e-06	1.27412e-05	1189	3	0.00252313	111	0	1	1	3197	6	0.00187676	328	1	0.518647	1	531	214	0.403013	74	39	0	0	791	1	0.00126422	115	0	1	1	2163	7	0.00323625	335	0	1	1	1
AT2G05120.1	795	492	0.618868	108	83	0	0	2147	12	0.00558919	275	2	0.848987	1	6354	23	0.00361977	823	1	0.840318	1	618	412	0.666667	92	70	0	0	1835	9	0.00490463	265	0	1	1	5110	11	0.00215264	737	0	1	1	1
AT2G05170.1	1184	432	0.364865	139	65	7.23595e-09	6.14512e-08	2026	10	0.00493583	231	3	0.534918	1	6815	14	0.00205429	811	0	1	1	1047	462	0.441261	142	67	0	0	1779	3	0.00168634	232	0	1	1	6187	15	0.00242444	819	0	1	1	1
AT2G05210.1	466	383	0.821888	68	62	0	0	658	3	0.00455927	87	2	0.286282	1	3108	4	0.001287	393	0	1	1	501	418	0.834331	69	63	0	0	631	1	0.00158479	89	0	1	1	2824	10	0.00354108	379	0	1	1	1
AT2G05260.1	400	155	0.3875	64	37	1.10714e-08	9.1608e-08	401	0	0	52	0	1	1	2059	1	0.000485673	264	0	1	1	439	236	0.537585	70	47	0	0	412	3	0.00728155	63	0	1	1	1833	9	0.00490998	279	0	1	1	1
AT2G05320.1	448	257	0.573661	64	52	0	0	547	3	0.00548446	70	1	0.575897	1	2350	9	0.00382979	359	0	1	1	508	307	0.604331	68	50	0	0	513	3	0.00584795	76	0	1	1	2282	5	0.00219106	374	0	1	1	1
AT2G05710.1	1377	551	0.400145	164	90	0	0	2312	6	0.00259516	259	0	1	1	7998	18	0.00225056	907	2	0.599569	1	1158	590	0.509499	151	90	0	0	1712	6	0.00350467	240	0	1	1	5981	12	0.00200635	849	0	1	1	1
AT2G05830.1	459	155	0.337691	55	28	1.84778e-05	0.000106942	1104	4	0.00362319	115	1	0.755664	1	3060	8	0.00261438	332	1	0.52292	1	419	183	0.436754	55	31	0	0	869	5	0.00575374	113	0	1	1	2525	8	0.00316832	334	0	1	1	1
AT2G05990.1	376	170	0.452128	46	26	2.97462e-06	1.8933e-05	922	2	0.0021692	110	0	1	1	3109	10	0.00321647	379	0	1	1	274	131	0.478102	46	26	0	0	689	1	0.00145138	114	0	1	1	2354	6	0.00254885	381	0	1	1	1
AT2G06000.1	936	317	0.338675	113	49	6.98763e-06	4.2828e-05	748	2	0.0026738	91	0	1	1	3651	12	0.00328677	455	1	0.637327	1	770	239	0.31039	110	41	0	0	621	8	0.0128824	90	4	0.0029746	0.113983	2752	5	0.00181686	438	0	1	1	1
AT2G06040.1	879	332	0.377702	112	54	3.55752e-08	2.79288e-07	1251	6	0.00479616	155	2	0.564323	1	3917	22	0.00561654	531	0	1	1	863	340	0.393975	115	53	0	0	1180	3	0.00254237	159	0	1	1	3633	17	0.00467933	530	0	1	1	1
AT2G06510.1	790	331	0.418987	115	67	9.10383e-15	1.3406e-13	1250	2	0.0016	179	1	0.88847	1	3397	9	0.0026494	536	0	1	1	736	276	0.375	104	50	0	0	1134	6	0.00529101	170	0	1	1	3000	4	0.00133333	460	0	1	1	1
AT2G06990.1	1284	550	0.428349	135	77	4.44089e-16	7.22206e-15	2532	14	0.00552923	271	4	0.420193	1	7834	23	0.00293592	841	0	1	1	975	458	0.469744	130	75	0	0	2051	7	0.00341297	266	0	1	1	5879	16	0.00272155	801	1	0.66111	1	1
AT2G07170.1	784	361	0.460459	96	66	0	0	2061	4	0.00194081	219	1	0.931685	1	6395	13	0.00203284	722	1	0.799998	1	694	402	0.579251	92	61	0	0	1549	1	0.000645578	210	0	1	1	5045	11	0.00218038	694	0	1	1	1
AT2G07360.1	1419	766	0.539817	181	114	0	0	2889	7	0.00242298	352	1	0.986612	1	8801	22	0.00249972	1071	0	1	1	1284	699	0.544393	185	109	0	0	2637	33	0.0125142	357	6	0.0312063	1	7814	15	0.00191963	1084	0	1	1	1
AT2G07690.1	949	366	0.385669	120	53	1.54046e-06	1.01928e-05	1729	8	0.00462695	210	1	0.92372	1	5406	15	0.00277469	653	1	0.766744	1	879	366	0.416382	115	49	0	0	1645	7	0.00425532	203	0	1	1	4733	9	0.00190154	619	0	1	1	1
AT2G11000.1	1397	516	0.369363	144	66	1.50637e-08	1.22758e-07	1472	6	0.00407609	155	1	0.850337	1	5945	13	0.00218671	640	0	1	1	1098	523	0.476321	138	63	0	0	1175	7	0.00595745	152	0	1	1	4779	9	0.00188324	628	0	1	1	1
AT2G11520.1	494	325	0.657895	74	62	0	0	712	4	0.00561798	95	2	0.322135	1	3320	13	0.00391566	402	0	1	1	630	510	0.809524	86	73	0	0	727	202	0.277854	97	47	0	0	3135	58	0.0185008	427	5	0.000323269	0.0166583	1
AT2G13100.1	817	286	0.350061	109	53	3.30736e-08	2.6063e-07	605	0	0	84	0	1	1	2828	14	0.0049505	419	1	0.607023	1	812	324	0.399015	110	58	0	0	589	1	0.00169779	78	0	1	1	2961	5	0.00168862	404	0	1	1	1
AT2G13290.1	639	319	0.499218	97	67	0	0	527	1	0.00189753	84	1	0.642756	1	1578	3	0.00190114	226	0	1	1	878	565	0.643508	111	85	0	0	711	7	0.00984529	96	2	0.13043	1	1784	8	0.0044843	264	0	1	1	1
AT2G13370.1	1959	1334	0.68096	235	186	0	0	3522	15	0.00425894	384	3	0.847021	1	13582	37	0.00272419	1487	2	0.84305	1	1737	1277	0.735176	227	177	0	0	2834	13	0.00458716	370	1	0.911449	1	10958	26	0.0023727	1424	0	1	1	1
AT2G13440.1	997	456	0.457372	131	59	1.80018e-07	1.31017e-06	1808	7	0.00387168	198	1	0.911636	1	5247	16	0.00304936	591	1	0.732173	1	896	409	0.456473	131	63	0	0	1533	5	0.00326158	204	1	0.737255	1	4791	14	0.00292215	612	0	1	1	1
AT2G13560.1	1123	507	0.451469	121	68	6.66134e-14	9.0871e-13	1364	5	0.00366569	151	0	1	1	5009	16	0.00319425	569	1	0.718711	1	903	390	0.431894	123	59	0	0	1067	1	0.000937207	147	0	1	1	4235	5	0.00118064	571	0	1	1	1
AT2G13600.1	1142	360	0.315236	115	52	8.0178e-07	5.44863e-06	1206	9	0.00746269	122	1	0.775749	1	5704	12	0.00210379	615	1	0.746125	1	881	294	0.333712	109	47	0	0	871	0	0	117	0	1	1	4031	10	0.00248077	566	0	1	1	1
AT2G13840.1	505	207	0.409901	82	47	1.8198e-10	1.79478e-09	572	3	0.00524476	91	1	0.672122	1	2392	5	0.0020903	390	1	0.58078	1	521	260	0.49904	84	49	0	0	534	2	0.00374532	92	0	1	1	2406	9	0.00374065	391	1	0.410338	1	1
AT2G14120.1	1472	725	0.492527	175	95	0	0	1960	5	0.00255102	212	0	1	1	5845	15	0.0025663	636	0	1	1	1277	679	0.531715	169	89	0	0	1564	11	0.00703325	204	2	0.384925	1	4874	8	0.00164136	612	0	1	1	1
AT2G14170.1	1003	460	0.458624	122	73	0	0	1490	6	0.00402685	156	1	0.85216	1	4864	16	0.00328947	530	1	0.693163	1	729	383	0.525377	116	67	0	0	974	54	0.0554415	145	9	5.89267e-07	2.73405e-05	3175	12	0.00377953	492	0	1	1	1
AT2G14255.1	736	270	0.366848	94	43	4.77546e-06	2.97558e-05	1156	2	0.0017301	141	2	0.513454	1	3425	11	0.00321168	413	1	0.601732	1	658	317	0.481763	104	53	0	0	1005	5	0.00497512	147	0	1	1	2860	9	0.00314685	425	0	1	1	1
AT2G14680.1	706	381	0.53966	70	44	9.18865e-12	1.01816e-10	1898	7	0.00368809	178	0	1	1	5746	5	0.000870171	558	0	1	1	449	251	0.55902	66	41	0	0	1268	10	0.00788644	170	1	0.671694	1	4090	3	0.000733496	532	0	1	1	1
AT2G14750.1	762	115	0.150919	68	26	0.00743153	0.0306398	568	2	0.00352113	48	0	1	1	2675	6	0.00224299	250	0	1	1	521	84	0.161228	62	22	7.28107e-10	8.26377e-09	369	1	0.00271003	43	0	1	1	1834	3	0.00163577	237	0	1	1	1
AT2G14820.1	732	221	0.301913	98	44	6.8006e-06	4.17563e-05	1047	5	0.00477555	141	0	1	1	3851	15	0.00389509	553	1	0.708498	1	589	166	0.281834	87	37	0	0	842	1	0.00118765	126	0	1	1	3121	11	0.00352451	469	0	1	1	1
AT2G14850.1	508	171	0.336614	70	37	2.63168e-07	1.88166e-06	395	1	0.00253165	53	0	1	1	1650	2	0.00121212	245	0	1	1	424	155	0.365566	67	35	0	0	355	1	0.0028169	52	0	1	1	1491	2	0.00134138	234	0	1	1	1
AT2G14910.1	449	266	0.592428	52	36	1.07236e-11	1.18335e-10	736	2	0.00271739	81	0	1	1	2652	5	0.00188537	316	1	0.505597	1	424	244	0.575472	53	35	0	0	648	4	0.00617284	83	2	0.102729	1	2254	4	0.00177462	309	0	1	1	1
AT2G15230.1	600	255	0.425	63	36	2.65345e-08	2.11005e-07	983	3	0.00305188	93	0	1	1	3497	9	0.00257363	351	0	1	1	401	201	0.501247	56	32	0	0	682	2	0.00293255	81	0	1	1	2296	6	0.00261324	307	0	1	1	1
AT2G15240.1	528	266	0.503788	64	39	5.22857e-10	4.95897e-09	456	2	0.00438596	53	0	1	1	1749	9	0.0051458	212	0	1	1	466	275	0.590129	66	40	0	0	365	5	0.0136986	52	1	0.288724	1	1434	6	0.0041841	208	0	1	1	1
AT2G15530.1	521	297	0.570058	83	61	0	0	1171	4	0.00341588	186	2	0.662896	1	4043	19	0.00469948	639	3	0.171888	1	495	339	0.684848	81	64	0	0	998	6	0.00601202	166	2	0.295225	1	3480	8	0.00229885	571	0	1	1	1
AT2G15560.1	675	222	0.328889	91	46	5.88209e-08	4.49002e-07	632	2	0.00316456	83	0	1	1	2568	6	0.00233645	351	0	1	1	576	207	0.359375	96	49	0	0	502	1	0.00199203	86	1	0.430762	1	2093	6	0.0028667	371	0	1	1	1
AT2G15695.1	577	241	0.417678	81	43	2.4657e-08	1.96629e-07	606	3	0.0049505	77	1	0.610759	1	2702	4	0.00148038	349	0	1	1	493	232	0.470588	86	45	0	0	491	2	0.00407332	85	0	1	1	2197	7	0.00318616	364	0	1	1	1
AT2G15790.1	407	159	0.390663	43	24	9.56265e-06	5.75017e-05	516	0	0	62	0	1	1	2018	5	0.0024777	259	1	0.438613	1	344	179	0.520349	48	27	0	0	468	0	0	69	0	1	1	1945	6	0.00308483	311	0	1	1	1
AT2G15820.1	1323	316	0.238851	154	54	0.00178997	0.00805386	1447	3	0.00207326	145	0	1	1	5449	9	0.00165168	651	1	0.765702	1	1198	285	0.237896	161	49	0	0	1058	1	0.00094518	139	0	1	1	3891	10	0.00257003	608	0	1	1	1
AT2G15860.1	619	218	0.352181	68	27	0.00353775	0.0152351	1654	1	0.000604595	173	0	1	1	4012	11	0.00274177	453	0	1	1	508	187	0.36811	65	26	8.48432e-13	1.11547e-11	1161	5	0.00430663	165	0	1	1	2881	4	0.00138841	412	0	1	1	1
AT2G15880.1	564	132	0.234043	91	35	0.00189325	0.00849782	659	0	0	109	0	1	1	2975	7	0.00235294	444	0	1	1	486	152	0.312757	85	27	1.64611e-10	1.91913e-09	558	6	0.0107527	97	1	0.470343	1	2185	5	0.00228833	391	0	1	1	1
AT2G15900.1	1107	572	0.516712	136	82	0	0	2049	6	0.00292826	243	0	1	1	7213	19	0.00263413	878	0	1	1	937	529	0.564568	134	83	0	0	1732	5	0.00288684	242	0	1	1	6046	13	0.00215018	872	1	0.692104	1	1
AT2G15910.1	596	183	0.307047	88	43	5.26817e-07	3.67051e-06	602	9	0.0149502	89	6	0.000800403	0.025525	2004	7	0.00349301	302	0	1	1	437	185	0.423341	74	39	0	0	539	2	0.00371058	79	0	1	1	1973	9	0.00456158	285	0	1	1	1
AT2G16070.1	201	106	0.527363	36	28	2.25517e-11	2.41419e-10	253	1	0.00395257	34	0	1	1	1344	4	0.00297619	169	0	1	1	305	243	0.796721	48	44	0	0	259	30	0.11583	41	10	1.3145e-13	7.91259e-12	1336	3	0.00224551	209	0	1	1	1
AT2G16250.1	1112	388	0.348921	133	63	6.541e-09	5.56576e-08	1591	3	0.00188561	179	1	0.88847	1	5620	11	0.0019573	689	1	0.784731	1	901	375	0.416204	142	72	0	0	1316	2	0.00151976	201	0	1	1	4823	8	0.00165872	742	0	1	1	1
AT2G16390.1	821	450	0.548112	96	61	4.44089e-16	7.22206e-15	1591	3	0.00188561	191	1	0.903722	1	6122	15	0.00245018	724	0	1	1	780	468	0.6	113	77	0	0	1330	1	0.00075188	192	0	1	1	5160	8	0.00155039	769	0	1	1	1
AT2G16405.1	853	225	0.263775	86	32	0.00520944	0.0219516	1032	3	0.00290698	116	1	0.75864	1	4358	14	0.00321248	420	0	1	1	534	159	0.297753	84	31	7.70495e-14	1.06311e-12	774	3	0.00387597	112	0	1	1	2887	13	0.00450294	413	1	0.427605	1	1
AT2G16460.1	674	182	0.27003	63	25	0.00493767	0.0208613	453	2	0.00441501	41	0	1	1	1984	4	0.00201613	190	0	1	1	541	162	0.299445	64	28	7.32747e-15	1.06752e-13	370	0	0	42	0	1	1	1570	4	0.00254777	190	0	1	1	1
AT2G16630.1	313	93	0.297125	50	23	0.000669009	0.00317633	826	2	0.00242131	110	0	1	1	2369	7	0.00295483	327	0	1	1	287	94	0.327526	44	19	2.01356e-10	2.34297e-09	618	1	0.00161812	93	0	1	1	1894	13	0.00686378	279	0	1	1	1
AT2G16640.1	654	351	0.536697	99	69	0	0	1464	8	0.00546448	230	5	0.151365	1	4317	12	0.00277971	740	1	0.807864	1	865	542	0.62659	130	91	0	0	1711	5	0.00292227	267	1	0.826111	1	5042	13	0.00257834	893	0	1	1	1
AT2G16770.1	333	99	0.297297	39	14	0.0707765	0.247561	426	1	0.00234742	48	0	1	1	1986	10	0.00503525	226	1	0.395759	1	231	84	0.363636	40	16	2.0523e-08	2.13809e-07	286	1	0.0034965	49	0	1	1	1244	4	0.00321543	232	0	1	1	1
AT2G16860.1	510	287	0.562745	57	39	2.65954e-12	3.11682e-11	524	3	0.00572519	62	0	1	1	1893	4	0.00211305	241	0	1	1	537	386	0.718808	55	44	0	0	523	4	0.00764818	56	0	1	1	1853	6	0.00323799	217	0	1	1	1
AT2G16880.1	826	237	0.286925	86	30	0.0179848	0.0698874	903	1	0.00110742	89	0	1	1	5410	13	0.00240296	609	1	0.742707	1	660	145	0.219697	70	19	1.23465e-06	1.17037e-05	637	1	0.00156986	71	0	1	1	3338	9	0.00269623	461	0	1	1	1
AT2G16920.1	1225	824	0.672653	149	121	0	0	2285	11	0.004814	263	4	0.398454	1	7902	17	0.00215135	956	1	0.881287	1	1146	852	0.743455	150	123	0	0	1971	9	0.00456621	253	2	0.492438	1	6447	18	0.002792	881	0	1	1	1
AT2G16940.1	657	411	0.625571	94	73	0	0	1308	9	0.00688073	165	2	0.598245	1	3368	8	0.0023753	429	0	1	1	576	307	0.532986	91	55	0	0	1185	2	0.00168776	166	0	1	1	2881	11	0.00381812	441	1	0.448852	1	1
AT2G16950.1	1079	573	0.531047	119	66	3.57048e-13	4.54511e-12	2809	6	0.00213599	285	0	1	1	7765	22	0.00283323	790	0	1	1	844	429	0.508294	115	67	0	0	2119	4	0.00188768	282	1	0.842387	1	5704	11	0.00192847	778	0	1	1	1
AT2G17020.1	951	190	0.19979	125	40	0.031336	0.11674	1182	6	0.00507614	146	1	0.832887	1	4702	9	0.00191408	597	0	1	1	821	208	0.25335	124	40	4.21885e-15	6.21238e-14	863	2	0.0023175	140	0	1	1	3616	4	0.00110619	577	0	1	1	1
AT2G17033.1	663	232	0.349925	78	29	0.00766602	0.0315334	1110	2	0.0018018	125	0	1	1	3311	5	0.00151012	379	0	1	1	591	236	0.399323	78	30	5.32907e-14	7.44719e-13	957	14	0.014629	123	3	0.0473221	1	2666	3	0.00112528	382	0	1	1	1
AT2G17140.1	1199	367	0.306088	117	54	2.20019e-07	1.58661e-06	1748	13	0.00743707	174	3	0.355741	1	6875	16	0.00232727	748	0	1	1	818	282	0.344743	102	35	2.55351e-14	3.63085e-13	1234	5	0.00405186	159	0	1	1	4622	11	0.00237992	678	0	1	1	1
AT2G17150.1	797	329	0.412798	109	58	8.71975e-11	8.87152e-10	1632	4	0.00245098	222	2	0.753913	1	6360	14	0.00220126	858	1	0.852303	1	721	362	0.50208	97	53	0	0	1404	2	0.0014245	195	1	0.721296	1	5352	19	0.00355007	759	0	1	1	1
AT2G17250.1	855	203	0.237427	80	28	0.0207632	0.0798372	1357	4	0.00294768	129	2	0.466832	1	5190	13	0.00250482	483	0	1	1	652	195	0.29908	85	32	1.59872e-14	2.2902e-13	1014	1	0.000986193	129	0	1	1	3504	5	0.00142694	478	0	1	1	1
AT2G17360.1	149	17	0.114094	22	5	0.649088	1	263	0	0	38	0	1	1	1898	3	0.00158061	258	0	1	1	128	40	0.3125	26	12	1.82891e-07	1.80799e-06	245	0	0	36	0	1	1	1448	3	0.00207182	238	0	1	1	1
AT2G17380.1	345	291	0.843478	38	36	0	0	301	1	0.00332226	36	0	1	1	1281	8	0.00624512	141	0	1	1	297	242	0.814815	38	34	0	0	292	2	0.00684932	36	0	1	1	1071	5	0.00466853	141	0	1	1	1
AT2G17410.1	1014	440	0.433925	117	67	2.91989e-14	4.10332e-13	1847	5	0.00270709	210	1	0.92372	1	5698	24	0.004212	689	0	1	1	882	451	0.511338	120	68	0	0	1611	5	0.00310366	216	2	0.412272	1	4670	13	0.00278373	680	0	1	1	1
AT2G17500.1	633	191	0.301738	65	28	0.000687291	0.00325795	897	8	0.00891862	90	2	0.299766	1	3579	13	0.0036323	377	0	1	1	482	172	0.356846	64	26	5.50449e-13	7.33142e-12	679	4	0.00589102	87	0	1	1	2749	11	0.00400146	368	0	1	1	1
AT2G17530.1	683	229	0.335286	89	40	1.6916e-05	9.83903e-05	892	3	0.00336323	105	1	0.723811	1	2698	13	0.00481838	315	1	0.504494	1	661	290	0.438729	91	48	0	0	858	2	0.002331	105	0	1	1	2380	4	0.00168067	312	0	1	1	1
AT2G17570.1	405	283	0.698765	47	39	0	0	695	4	0.0057554	74	2	0.227752	1	2036	13	0.00638507	230	0	1	1	287	229	0.797909	44	39	0	0	468	1	0.00213675	71	0	1	1	1412	2	0.00141643	216	0	1	1	1
AT2G17640.1	406	111	0.273399	51	18	0.0518826	0.185966	612	1	0.00163399	61	0	1	1	2682	9	0.0033557	314	0	1	1	318	122	0.383648	55	22	4.74716e-11	5.71362e-10	382	0	0	63	0	1	1	1831	7	0.00382305	315	0	1	1	1
AT2G17650.1	720	239	0.331944	99	42	5.6707e-05	0.000309719	998	2	0.00200401	138	1	0.815674	1	3498	9	0.0025729	487	0	1	1	698	199	0.2851	97	34	2.89768e-14	4.11291e-13	823	1	0.00121507	128	0	1	1	2745	8	0.00291439	454	0	1	1	1
AT2G17760.1	1114	340	0.305206	114	46	0.000112416	0.00059058	1237	5	0.00404204	127	1	0.789076	1	4181	17	0.00406601	438	0	1	1	781	255	0.326504	112	46	0	0	919	1	0.00108814	127	0	1	1	2946	6	0.00203666	438	1	0.446614	1	1
AT2G17790.1	1329	435	0.327314	135	57	3.62707e-06	2.28314e-05	2156	2	0.000927644	217	1	0.92999	1	6131	17	0.00277279	644	0	1	1	991	449	0.453078	135	64	0	0	1674	2	0.00119474	215	0	1	1	4872	10	0.00205255	647	0	1	1	1
AT2G17820.1	1416	323	0.228107	155	53	0.00359664	0.0154804	2673	4	0.00149645	295	1	0.973081	1	9882	37	0.00374418	1084	0	1	1	1135	392	0.345374	155	58	0	0	2073	10	0.00482393	294	0	1	1	7982	15	0.00187923	1087	1	0.769716	1	1
AT2G17930.1	3795	2006	0.52859	494	318	0	0	7627	25	0.00327783	971	12	0.518955	1	26074	76	0.00291478	3338	0	1	1	3154	1826	0.578947	476	308	0	0	6097	29	0.00475644	931	5	0.726371	1	20388	52	0.00255052	3121	2	0.922995	1	1
AT2G18000.1	448	116	0.258929	48	20	0.00601047	0.0251153	326	2	0.00613497	41	1	0.394932	1	1413	1	0.000707714	169	0	1	1	379	116	0.306069	48	20	1.47969e-10	1.73015e-09	312	1	0.00320513	42	0	1	1	1253	0	0	175	0	1	1	1
AT2G18090.1	827	321	0.38815	127	58	1.26276e-07	9.30748e-07	1636	6	0.00366748	208	1	0.921827	1	4948	10	0.00202102	676	0	1	1	793	262	0.330391	127	49	0	0	1374	2	0.0014556	202	0	1	1	4409	14	0.00317532	675	0	1	1	1
AT2G18100.1	948	398	0.419831	126	62	1.30848e-09	1.19975e-08	1770	3	0.00169492	205	1	0.9189	1	5122	6	0.00117142	589	0	1	1	850	324	0.381176	124	57	0	0	1307	2	0.00153022	193	0	1	1	3967	10	0.0025208	590	1	0.549338	1	1
AT2G18220.1	758	382	0.503958	92	62	0	0	1597	11	0.00688791	187	5	0.0799285	1	5098	16	0.00313849	631	2	0.410052	1	627	362	0.577352	90	63	0	0	1240	7	0.00564516	175	0	1	1	3982	10	0.0025113	583	0	1	1	1
AT2G18280.1	340	103	0.302941	47	21	0.00178115	0.00802246	690	3	0.00434783	96	0	1	1	2428	2	0.000823723	328	0	1	1	316	139	0.439873	51	25	7.43849e-15	1.08271e-13	574	1	0.00174216	92	0	1	1	2064	11	0.00532946	330	0	1	1	1
AT2G18330.1	1058	397	0.375236	150	69	5.98226e-09	5.113e-08	1304	3	0.00230061	178	1	0.887095	1	3764	8	0.0021254	504	0	1	1	729	299	0.410151	122	58	0	0	1071	2	0.00186741	168	0	1	1	3030	9	0.0029703	465	0	1	1	1
AT2G18465.1	577	135	0.233969	62	26	0.00168518	0.00762743	577	3	0.00519931	69	2	0.205424	1	2005	5	0.00249377	229	0	1	1	541	216	0.399261	65	37	0	0	529	3	0.00567108	70	0	1	1	1708	0	0	233	0	1	1	1
AT2G18630.1	557	185	0.332136	61	29	6.76316e-05	0.000366333	710	0	0	72	0	1	1	2557	4	0.00156433	274	0	1	1	498	292	0.586345	60	38	0	0	632	1	0.00158228	78	0	1	1	2069	4	0.0019333	285	0	1	1	1
AT2G18710.1	803	243	0.302615	100	39	0.000792861	0.0037337	1178	3	0.00254669	143	1	0.826629	1	4099	15	0.00365943	475	1	0.653141	1	684	215	0.314327	95	36	2.22045e-16	3.43854e-15	940	5	0.00531915	136	0	1	1	3200	6	0.001875	462	0	1	1	1
AT2G18750.1	621	283	0.455717	71	40	7.96327e-09	6.71998e-08	1384	4	0.00289017	158	1	0.855739	1	3989	11	0.00275758	497	1	0.66974	1	602	303	0.503322	76	43	0	0	1250	5	0.004	160	0	1	1	3740	8	0.00213904	533	0	1	1	1
AT2G18760.1	1606	847	0.527397	212	139	0	0	2554	6	0.00234926	322	2	0.903899	1	7391	12	0.0016236	969	1	0.884678	1	1465	839	0.572696	216	141	0	0	2223	10	0.00449843	327	2	0.630353	1	6741	21	0.00311526	1009	1	0.744126	1	1
AT2G18770.1	362	134	0.370166	46	20	0.00335814	0.0145625	600	5	0.00833333	68	2	0.200986	1	2174	4	0.00183993	218	0	1	1	298	176	0.590604	41	22	2.64233e-14	3.7538e-13	474	0	0	65	0	1	1	1671	6	0.00359066	213	0	1	1	1
AT2G18790.1	2024	725	0.358202	272	129	1.11022e-16	1.90152e-15	2316	8	0.00345423	310	2	0.89199	1	6783	19	0.00280112	940	0	1	1	1717	634	0.369249	279	128	0	0	1859	2	0.00107585	301	0	1	1	5504	17	0.00308866	937	0	1	1	1
AT2G18800.1	327	122	0.373089	48	22	0.000923273	0.00429432	311	4	0.0128617	42	2	0.0927919	1	2106	9	0.0042735	284	1	0.469042	1	237	87	0.367089	45	21	3.54583e-12	4.51104e-11	235	19	0.0808511	42	8	3.20371e-10	1.7173e-08	1450	10	0.00689655	244	1	0.280805	1	1
AT2G18850.1	740	309	0.417568	86	47	1.5965e-09	1.45274e-08	878	3	0.00341686	91	0	1	1	4392	9	0.00204918	493	0	1	1	606	255	0.420792	88	45	0	0	649	2	0.00308166	92	1	0.452705	1	3282	5	0.00152346	495	0	1	1	1
AT2G18900.1	1125	291	0.258667	125	44	0.00412352	0.0176154	2080	4	0.00192308	218	2	0.744961	1	6612	18	0.00272232	714	0	1	1	945	342	0.361905	124	56	0	0	1586	4	0.00252207	217	0	1	1	4961	8	0.00161258	693	0	1	1	1
AT2G18915.1	859	376	0.437718	119	67	8.9706e-14	1.20861e-12	875	3	0.00342857	124	1	0.781178	1	3064	7	0.0022846	465	1	0.645322	1	831	507	0.610108	138	90	0	0	881	7	0.00794552	143	2	0.239842	1	3011	11	0.00365327	516	0	1	1	1
AT2G18940.1	1097	566	0.515953	145	98	0	0	1131	1	0.000884173	147	0	1	1	4753	10	0.00210393	630	0	1	1	984	561	0.570122	135	92	0	0	977	20	0.0204708	136	6	0.000295517	0.0119945	3359	12	0.00357249	513	0	1	1	1
AT2G18950.1	673	302	0.448737	64	36	4.64157e-08	3.57779e-07	1189	4	0.00336417	105	1	0.723811	1	3832	7	0.00182672	334	0	1	1	528	347	0.657197	63	45	0	0	851	3	0.00352526	104	0	1	1	2801	7	0.00249911	326	0	1	1	1
AT2G18960.1	1062	597	0.562147	148	103	0	0	2005	5	0.00249377	270	2	0.841699	1	6260	19	0.00303514	870	0	1	1	816	448	0.54902	130	84	0	0	1568	6	0.00382653	249	2	0.484105	1	4823	15	0.0031101	772	0	1	1	1
AT2G19080.1	435	210	0.482759	41	22	5.07835e-05	0.000278914	751	3	0.00399467	68	1	0.565375	1	2832	8	0.00282486	268	0	1	1	326	148	0.453988	41	18	4.3213e-10	4.95612e-09	597	2	0.00335008	68	0	1	1	2188	3	0.00137112	283	0	1	1	1
AT2G19090.1	1116	579	0.518817	136	88	0	0	1463	5	0.00341763	176	1	0.884294	1	5015	8	0.00159521	623	0	1	1	1160	679	0.585345	139	91	0	0	1519	5	0.00329164	187	0	1	1	4671	7	0.00149861	613	0	1	1	1
AT2G19110.1	1783	314	0.176108	177	48	0.214641	0.669537	2934	8	0.00272665	300	2	0.881031	1	9405	34	0.0036151	1048	0	1	1	1422	293	0.206048	163	43	1.02807e-12	1.34245e-11	2058	10	0.00485909	264	1	0.822659	1	6454	31	0.00480322	904	0	1	1	1
AT2G19160.1	476	355	0.745798	63	52	0	0	879	4	0.00455063	98	4	0.0322635	0.800184	2965	8	0.00269815	354	0	1	1	456	364	0.798246	60	53	0	0	729	3	0.00411523	95	1	0.463357	1	2607	8	0.00306866	334	0	1	1	1
AT2G19170.1	776	597	0.76933	126	112	0	0	1636	5	0.00305623	232	3	0.537819	1	5009	12	0.00239569	727	1	0.802215	1	829	677	0.816647	130	118	0	0	1433	4	0.00279135	229	0	1	1	4465	17	0.00380739	708	0	1	1	1
AT2G19260.1	580	303	0.522414	72	45	7.13851e-12	8.07411e-11	1602	6	0.00374532	175	1	0.882868	1	4325	13	0.00300578	511	0	1	1	535	310	0.579439	72	47	0	0	1409	4	0.00283889	176	0	1	1	3763	10	0.00265745	501	1	0.491763	1	1
AT2G19280.1	600	214	0.356667	73	34	2.84671e-05	0.000161409	1262	2	0.00158479	143	2	0.520958	1	5004	9	0.00179856	588	0	1	1	568	242	0.426056	76	36	0	0	1082	0	0	140	0	1	1	4323	12	0.00277585	588	0	1	1	1
AT2G19390.1	1415	889	0.628269	192	153	0	0	2521	11	0.00436335	306	3	0.720849	1	8398	22	0.00261967	1044	2	0.675119	1	1443	1034	0.716563	189	154	0	0	2377	7	0.00294489	307	0	1	1	7728	18	0.00232919	1028	0	1	1	1
AT2G19430.1	477	149	0.312369	61	20	0.0845085	0.291417	927	6	0.00647249	100	2	0.344319	1	2926	11	0.0037594	319	1	0.508892	1	530	144	0.271698	63	18	1.02824e-06	9.776e-06	840	4	0.0047619	100	0	1	1	2797	4	0.0014301	328	0	1	1	1
AT2G19490.1	635	214	0.337008	73	32	0.000200652	0.00102126	887	2	0.00225479	97	0	1	1	2766	6	0.0021692	334	1	0.525042	1	459	189	0.411765	69	33	0	0	606	2	0.00330033	94	0	1	1	2084	3	0.00143954	321	0	1	1	1
AT2G19540.1	626	166	0.265176	67	26	0.00594273	0.0248798	1307	7	0.00535578	140	1	0.820137	1	4165	14	0.00336134	459	0	1	1	491	210	0.427699	67	33	0	0	958	1	0.00104384	140	0	1	1	3205	4	0.00124805	459	0	1	1	1
AT2G19560.1	798	339	0.424812	78	38	2.58437e-06	1.66411e-05	906	7	0.00772627	83	2	0.268262	1	3873	7	0.00180738	364	0	1	1	628	307	0.488854	74	38	0	0	644	0	0	80	0	1	1	2940	9	0.00306122	336	0	1	1	1
AT2G19600.1	937	371	0.395945	104	48	1.0057e-06	6.77967e-06	1671	10	0.00598444	178	2	0.639311	1	4603	14	0.00304149	486	0	1	1	675	1	0.00148148	92	0	1	1	1329	4	0.00300978	167	0	1	1	3719	10	0.00268889	467	0	1	1	1
AT2G19710.1	1267	366	0.288871	148	65	1.40797e-07	1.03555e-06	2432	6	0.00246711	275	4	0.430994	1	7470	26	0.00348059	809	0	1	1	990	3	0.0030303	138	1	0.999987	1	1805	3	0.00166205	254	0	1	1	5101	9	0.00176436	743	0	1	1	1
AT2G19830.1	199	82	0.41206	26	15	0.000280079	0.00139722	408	1	0.00245098	49	0	1	1	1447	7	0.0048376	180	0	1	1	191	2	0.0104712	25	0	1	1	397	1	0.00251889	48	0	1	1	1304	2	0.00153374	180	0	1	1	1
AT2G19870.1	788	299	0.379442	94	47	6.54787e-08	4.97686e-07	1113	3	0.00269542	123	0	1	1	4095	19	0.0046398	500	1	0.671942	1	741	0	0	85	0	1	1	955	5	0.0052356	119	1	0.541441	1	2853	8	0.00280407	449	0	1	1	1
AT2G19880.1	649	243	0.374422	64	32	7.82016e-06	4.75541e-05	1272	3	0.00235849	116	1	0.75864	1	4822	5	0.00103691	434	0	1	1	562	0	0	69	0	1	1	949	3	0.00316122	119	1	0.541441	1	3666	7	0.00190944	469	0	1	1	1
AT2G19930.1	1355	389	0.287085	134	53	6.72579e-05	0.00036472	2482	10	0.00402901	241	0	1	1	8628	38	0.00440427	847	1	0.848636	1	1004	0	0	131	0	1	1	1743	5	0.00286862	239	0	1	1	6358	16	0.00251651	837	0	1	1	1
AT2G19950.1	918	529	0.576253	99	67	0	0	2217	6	0.00270636	220	0	1	1	6227	22	0.003533	654	1	0.767264	1	765	6	0.00784314	96	0	1	1	1654	3	0.00181378	210	0	1	1	4904	8	0.00163132	641	0	1	1	1
AT2G20050.1	1477	788	0.533514	189	115	0	0	2187	7	0.00320073	253	1	0.954963	1	8153	10	0.00122654	974	0	1	1	1275	3	0.00235294	186	1	1	1	1782	2	0.00112233	250	0	1	1	6430	12	0.00186625	952	0	1	1	1
AT2G20190.1	2013	1055	0.524093	243	142	0	0	3230	12	0.00371517	385	4	0.690217	1	10407	30	0.00288268	1260	0	1	1	1715	5	0.00291545	239	1	1	1	2746	8	0.00291333	384	0	1	1	8853	33	0.00372755	1262	0	1	1	1
AT2G20210.1	868	448	0.516129	94	60	5.55112e-16	8.99404e-15	1497	4	0.00267201	150	1	0.84088	1	5043	15	0.00297442	533	1	0.695208	1	762	1	0.00131234	98	0	1	1	1140	3	0.00263158	150	0	1	1	4027	11	0.00273156	537	0	1	1	1
AT2G20280.1	412	117	0.283981	49	22	0.00129397	0.00593341	721	3	0.00416089	74	0	1	1	2362	14	0.00592718	275	2	0.125833	1	416	0	0	53	0	1	1	633	5	0.00789889	82	0	1	1	2305	5	0.0021692	323	0	1	1	1
AT2G20290.1	2128	960	0.451128	201	117	0	0	4048	11	0.00271739	370	1	0.989262	1	14074	48	0.00341054	1326	2	0.793984	1	1589	4	0.00251731	197	1	1	1	2854	13	0.00455501	363	2	0.686083	1	10288	15	0.00145801	1301	0	1	1	1
AT2G20300.1	920	559	0.607609	130	97	0	0	1232	7	0.00568182	171	2	0.617624	1	4732	10	0.00211327	654	0	1	1	916	4	0.00436681	136	1	0.999985	1	1019	1	0.000981354	158	0	1	1	4252	13	0.00305738	648	0	1	1	1
AT2G20310.1	924	167	0.180736	124	38	0.064289	0.22676	776	2	0.00257732	107	1	0.730498	1	2471	8	0.00323756	339	1	0.530306	1	836	2	0.00239234	114	0	1	1	692	2	0.00289017	97	0	1	1	2202	7	0.00317893	307	0	1	1	1
AT2G20320.1	1351	871	0.644708	152	118	0	0	2448	13	0.00531046	272	4	0.422898	1	6822	25	0.00366461	816	1	0.837807	1	1217	1	0.000821693	154	0	1	1	2186	4	0.00182983	269	0	1	1	6041	12	0.00198643	808	0	1	1	1
AT2G20330.1	938	250	0.266525	159	51	0.0161677	0.0632824	1019	1	0.000981354	160	1	0.859232	1	3404	10	0.00293772	513	0	1	1	938	8	0.00852878	142	0	1	1	1069	3	0.00280636	150	0	1	1	3311	9	0.00271821	483	0	1	1	1
AT2G20360.1	741	263	0.354926	79	36	3.03081e-05	0.00017126	1025	2	0.00195122	108	0	1	1	3714	9	0.00242326	388	0	1	1	482	2	0.00414938	72	0	1	1	687	1	0.0014556	105	0	1	1	2442	2	0.000819001	365	0	1	1	1
AT2G20370.1	656	202	0.307927	96	43	9.25682e-06	5.58657e-05	1025	2	0.00195122	148	1	0.836933	1	3658	11	0.00300711	511	0	1	1	650	14	0.0215385	100	2	0.997298	1	963	1	0.00103842	143	0	1	1	3166	8	0.00252685	519	0	1	1	1
AT2G20390.1	355	82	0.230986	40	15	0.0436025	0.158465	360	0	0	40	0	1	1	1733	2	0.00115407	188	0	1	1	207	0	0	33	0	1	1	208	2	0.00961538	34	1	0.199695	1	1022	5	0.00489237	163	0	1	1	1
AT2G20400.1	652	195	0.29908	63	24	0.0103769	0.0418241	1103	1	0.000906618	107	0	1	1	3248	7	0.00215517	322	0	1	1	573	1	0.0017452	70	0	1	1	892	3	0.00336323	113	0	1	1	2431	7	0.00287947	340	0	1	1	1
AT2G20410.1	417	111	0.266187	40	16	0.0203332	0.0783408	957	3	0.0031348	94	1	0.683957	1	3293	9	0.00273307	321	0	1	1	325	1	0.00307692	40	0	1	1	815	1	0.00122699	91	0	1	1	2535	8	0.00315582	308	0	1	1	1
AT2G20420.1	677	239	0.353028	71	34	1.36442e-05	8.01661e-05	1019	5	0.00490677	108	0	1	1	3671	17	0.00463089	398	1	0.58819	1	555	3	0.00540541	70	0	1	1	850	1	0.00117647	107	0	1	1	2962	5	0.00168805	389	0	1	1	1
AT2G20495.1	624	243	0.389423	68	32	3.74855e-05	0.000209109	621	1	0.00161031	65	0	1	1	2345	3	0.00127932	237	0	1	1	495	21	0.0424242	66	2	0.969803	1	520	1	0.00192308	65	0	1	1	1865	4	0.00214477	233	0	1	1	1
AT2G20580.1	1054	569	0.539848	122	78	0	0	2381	11	0.00461991	261	4	0.392995	1	7562	17	0.00224808	829	0	1	1	946	4	0.00422833	127	0	1	1	1914	8	0.00417973	258	0	1	1	5990	13	0.00217028	810	0	1	1	1
AT2G20650.1	867	403	0.464821	102	60	1.21902e-13	1.62191e-12	1343	5	0.00372301	137	0	1	1	4499	17	0.00377862	488	0	1	1	764	0	0	100	0	1	1	1162	3	0.00258176	135	0	1	1	4045	5	0.00123609	479	0	1	1	1
AT2G20780.1	809	303	0.374536	136	69	2.73467e-11	2.91708e-10	991	3	0.00302725	163	2	0.591623	1	2224	6	0.00269784	389	1	0.579845	1	660	4	0.00606061	125	1	0.999963	1	764	2	0.0026178	145	0	1	1	1839	6	0.00326264	340	0	1	1	1
AT2G20790.1	679	191	0.281296	85	36	0.000193186	0.000987139	1158	6	0.00518135	162	3	0.315977	1	3860	21	0.00544041	530	3	0.116035	1	597	1	0.00167504	89	0	1	1	1097	2	0.00182315	172	0	1	1	3228	4	0.00123916	542	0	1	1	1
AT2G20840.1	462	149	0.322511	58	27	0.0001852	0.000948856	670	2	0.00298507	77	0	1	1	1992	9	0.00451807	244	0	1	1	421	4	0.00950119	60	0	1	1	536	0	0	81	0	1	1	1669	2	0.00119832	251	0	1	1	1
AT2G21080.1	499	140	0.280561	54	20	0.0251653	0.0952076	922	3	0.0032538	92	0	1	1	3594	8	0.00222593	382	0	1	1	340	0	0	54	0	1	1	627	3	0.00478469	93	0	1	1	2489	7	0.00281237	384	0	1	1	1
AT2G21150.1	695	252	0.36259	80	32	0.0013743	0.00627775	1067	5	0.00468604	110	1	0.740225	1	2479	5	0.00201694	284	0	1	1	550	1	0.00181818	79	0	1	1	841	1	0.00118906	105	0	1	1	2080	3	0.00144231	273	0	1	1	1
AT2G21160.1	318	128	0.402516	36	21	1.36671e-05	8.02223e-05	628	3	0.00477707	59	0	1	1	2404	5	0.00207987	255	0	1	1	259	1	0.003861	33	0	1	1	450	0	0	59	0	1	1	1857	5	0.00269251	238	0	1	1	1
AT2G21170.1	506	231	0.456522	57	30	3.9062e-06	2.45049e-05	641	2	0.00312012	72	1	0.586165	1	2246	9	0.00400712	266	0	1	1	446	0	0	66	0	1	1	541	2	0.00369686	80	0	1	1	1916	1	0.000521921	296	0	1	1	1
AT2G21230.1	928	223	0.240302	117	40	0.0103547	0.0417557	1143	5	0.00437445	139	0	1	1	3103	14	0.00451176	394	1	0.584501	1	832	3	0.00360577	111	0	1	1	974	1	0.00102669	137	0	1	1	2693	8	0.00297066	382	0	1	1	1
AT2G21240.1	346	176	0.508671	52	35	7.17548e-11	7.3471e-10	447	1	0.00223714	68	1	0.565375	1	1462	8	0.00547196	223	2	0.0889872	1	328	1	0.00304878	55	0	1	1	402	4	0.00995025	67	0	1	1	1391	3	0.00215672	219	0	1	1	1
AT2G21270.1	379	272	0.717678	47	37	6.43929e-15	9.6511e-14	746	3	0.00402145	89	0	1	1	2403	7	0.00291303	291	0	1	1	389	1	0.00257069	48	0	1	1	703	1	0.00142248	92	0	1	1	2189	7	0.00319781	298	0	1	1	1
AT2G21300.1	1144	889	0.777098	163	138	0	0	1690	6	0.0035503	227	3	0.523214	1	4927	15	0.00304445	681	1	0.780858	1	1142	4	0.00350263	173	1	0.999999	1	1537	5	0.00325309	234	0	1	1	4449	14	0.00314677	717	0	1	1	1
AT2G21370.1	677	241	0.355982	70	34	9.27241e-06	5.59387e-05	1274	7	0.00549451	138	1	0.815674	1	4463	18	0.00403316	453	1	0.635706	1	565	5	0.00884956	67	0	1	1	1040	0	0	134	0	1	1	3438	5	0.00145433	422	0	1	1	1
AT2G21380.1	1565	600	0.383387	175	76	2.36484e-08	1.88963e-07	2573	7	0.00272056	260	2	0.826159	1	7929	27	0.00340522	827	2	0.549652	1	1197	15	0.0125313	153	2	0.999947	1	2001	3	0.00149925	240	0	1	1	6461	10	0.00154775	783	0	1	1	1
AT2G21410.1	1037	298	0.287367	128	44	0.0066983	0.0277789	1918	8	0.00417101	210	0	1	1	6634	16	0.00241182	756	1	0.814596	1	759	1	0.00131752	123	1	0.999957	1	1406	4	0.00284495	202	1	0.733789	1	4877	14	0.00287062	727	0	1	1	1
AT2G21470.1	825	389	0.471515	94	59	3.10862e-15	4.76024e-14	1357	5	0.0036846	153	1	0.846624	1	4860	14	0.00288066	550	0	1	1	820	0	0	93	0	1	1	1253	2	0.00159617	149	0	1	1	4337	7	0.00161402	527	0	1	1	1
AT2G21520.1	845	237	0.280473	99	42	5.6707e-05	0.000309719	1114	4	0.00359066	131	3	0.214828	1	5053	16	0.00316644	554	1	0.709147	1	741	0	0	91	0	1	1	934	2	0.00214133	124	0	1	1	3728	10	0.0026824	490	0	1	1	1
AT2G21600.1	341	208	0.609971	43	35	5.32907e-15	8.0525e-14	455	0	0	55	0	1	1	1031	3	0.0029098	143	0	1	1	269	0	0	44	0	1	1	328	1	0.00304878	56	1	0.307122	1	956	5	0.00523013	148	0	1	1	1
AT2G22010.1	1665	1037	0.622823	199	145	0	0	2572	4	0.00155521	304	1	0.975892	1	8896	28	0.00314748	1066	1	0.907102	1	1322	7	0.00529501	202	2	0.999999	1	2008	6	0.00298805	310	0	1	1	6971	17	0.00243867	1074	0	1	1	1
AT2G22120.1	712	237	0.332865	78	35	5.76885e-05	0.000314677	975	0	0	102	0	1	1	2722	3	0.00110213	287	0	1	1	393	2	0.00508906	69	1	0.996427	1	560	0	0	94	0	1	1	1720	1	0.000581395	268	0	1	1	1
AT2G22125.1	1853	1156	0.623853	271	198	0	0	4313	17	0.00394157	619	5	0.8723	1	12495	51	0.00408163	1767	1	0.98053	1	1815	6	0.00330579	286	1	1	1	4042	7	0.00173182	640	0	1	1	11402	28	0.00245571	1793	0	1	1	1
AT2G22300.1	1050	555	0.528571	115	72	0	0	2419	5	0.00206697	258	2	0.82289	1	7858	22	0.00279969	874	0	1	1	815	3	0.00368098	109	0	1	1	1842	6	0.00325733	243	1	0.796501	1	5792	16	0.00276243	807	1	0.663846	1	1
AT2G22310.1	642	164	0.255452	70	23	0.0665	0.234214	1057	1	0.000946074	106	0	1	1	2885	10	0.0034662	297	0	1	1	520	1	0.00192308	69	0	1	1	755	1	0.0013245	101	0	1	1	2158	3	0.00139018	287	0	1	1	1
AT2G22360.1	751	404	0.537949	95	63	0	0	885	3	0.00338983	102	0	1	1	2764	7	0.00253256	335	1	0.526099	1	677	4	0.00590842	92	0	1	1	695	3	0.00431655	96	0	1	1	1846	4	0.00216685	289	0	1	1	1
AT2G22560.1	1183	363	0.306847	135	54	4.02567e-05	0.00022384	2133	10	0.00468823	237	3	0.552164	1	5855	15	0.00256191	760	0	1	1	1121	7	0.00624442	121	2	0.999422	1	1965	6	0.00305344	202	1	0.733789	1	4846	10	0.00206356	575	1	0.540113	1	1
AT2G22650.1	446	129	0.289238	56	28	2.83947e-05	0.00016117	927	4	0.00431499	104	1	0.720406	1	3533	15	0.00424568	388	0	1	1	407	1	0.002457	60	0	1	1	742	3	0.00404313	109	0	1	1	2716	4	0.00147275	401	0	1	1	1
AT2G22720.1	429	218	0.508159	56	44	0	0	629	5	0.00794913	85	1	0.647107	1	1534	4	0.00260756	217	0	1	1	384	1	0.00260417	56	0	1	1	611	2	0.00327332	100	0	1	1	1674	3	0.00179211	254	0	1	1	1
AT2G22740.1	906	223	0.246137	135	53	8.47098e-05	0.000452103	1147	3	0.00261552	165	3	0.325927	1	3677	18	0.0048953	598	3	0.150035	1	950	4	0.00421053	132	0	1	1	1040	2	0.00192308	149	0	1	1	3474	7	0.00201497	540	0	1	1	1
AT2G22840.1	726	173	0.238292	106	46	1.28036e-05	7.53845e-05	1078	1	0.000927644	130	0	1	1	2968	8	0.00269542	376	0	1	1	763	2	0.00262123	125	1	0.999963	1	1022	0	0	152	0	1	1	2626	6	0.00228484	432	0	1	1	1
AT2G22910.1	1257	356	0.283214	147	56	0.000141159	0.000733317	1305	4	0.00306513	162	1	0.86264	1	3943	16	0.00405782	503	1	0.674128	1	929	5	0.00538213	142	1	0.999991	1	1071	3	0.00280112	157	0	1	1	3184	3	0.000942211	495	0	1	1	1
AT2G23080.1	581	108	0.185886	55	19	0.0572072	0.203818	556	2	0.00359712	62	0	1	1	2758	3	0.00108774	295	0	1	1	457	1	0.00218818	57	0	1	1	447	1	0.00223714	60	1	0.325045	1	2156	3	0.00139147	286	0	1	1	1
AT2G23140.1	1049	346	0.329838	137	66	1.21006e-09	1.11164e-08	1854	5	0.00269687	231	2	0.773066	1	5858	15	0.0025606	700	1	0.789946	1	739	0	0	117	0	1	1	1292	3	0.00232198	202	0	1	1	3942	10	0.00253678	603	0	1	1	1
AT2G23150.1	929	217	0.233584	118	40	0.0120554	0.0481523	732	1	0.00136612	94	0	1	1	3434	6	0.00174723	424	0	1	1	775	1	0.00129032	123	0	1	1	624	3	0.00480769	96	0	1	1	2782	6	0.00215672	443	0	1	1	1
AT2G23350.1	922	215	0.233189	100	37	0.00314668	0.0137246	1794	3	0.00167224	198	0	1	1	4532	11	0.00242718	557	1	0.711085	1	736	20	0.0271739	99	6	0.797272	1	1366	2	0.00146413	193	0	1	1	3577	14	0.00391389	542	0	1	1	1
AT2G23370.1	460	211	0.458696	63	33	1.50075e-06	9.95058e-06	927	1	0.00107875	89	0	1	1	2657	5	0.00188182	267	0	1	1	518	1	0.0019305	66	0	1	1	806	2	0.00248139	96	0	1	1	2282	8	0.0035057	278	0	1	1	1
AT2G23380.1	1223	743	0.607522	141	102	0	0	2118	6	0.00283286	238	0	1	1	6856	20	0.00291715	784	0	1	1	1078	1	0.000927644	139	0	1	1	1794	7	0.0039019	221	1	0.764949	1	5465	19	0.00347667	741	0	1	1	1
AT2G23390.1	715	241	0.337063	79	34	0.000198541	0.00101299	916	2	0.00218341	91	0	1	1	3912	10	0.00255624	413	0	1	1	624	1	0.00160256	79	0	1	1	769	0	0	92	0	1	1	3324	7	0.0021059	412	0	1	1	1
AT2G23460.1	1234	562	0.455429	143	91	0	0	1780	4	0.00224719	201	2	0.703746	1	5690	9	0.00158172	726	0	1	1	1036	2	0.0019305	141	0	1	1	1474	1	0.000678426	196	0	1	1	4509	15	0.00332668	672	0	1	1	1
AT2G23520.1	781	393	0.503201	113	75	0	0	1438	8	0.00556328	195	3	0.424334	1	4592	14	0.00304878	625	3	0.164325	1	921	5	0.00542888	126	0	1	1	1536	6	0.00390625	210	0	1	1	4472	14	0.00313059	641	0	1	1	1
AT2G23700.1	1341	415	0.309471	153	80	9.39249e-14	1.26262e-12	1308	1	0.000764526	134	0	1	1	5554	19	0.00342096	583	2	0.372633	1	1283	2	0.00155885	165	0	1	1	1090	1	0.000917431	139	1	0.597759	1	4718	8	0.00169563	594	0	1	1	1
AT2G23740.1	1777	1098	0.617895	241	185	0	0	2292	9	0.0039267	303	1	0.975595	1	8268	30	0.00362845	1147	2	0.723942	1	1929	3	0.00155521	253	0	1	1	2357	3	0.0012728	311	0	1	1	8390	19	0.0022646	1154	0	1	1	1
AT2G23890.1	1234	286	0.231767	111	40	0.00379487	0.0162868	1244	3	0.00241158	114	0	1	1	4779	5	0.00104624	437	0	1	1	915	1	0.0010929	109	0	1	1	897	1	0.00111483	105	0	1	1	3886	11	0.00283067	441	0	1	1	1
AT2G24020.1	419	142	0.338902	36	16	0.00644565	0.0267821	527	0	0	45	0	1	1	1681	2	0.00118977	165	0	1	1	299	0	0	33	0	1	1	390	0	0	42	0	1	1	1326	4	0.00301659	156	0	1	1	1
AT2G24070.1	675	320	0.474074	95	66	0	0	1025	6	0.00585366	125	1	0.783843	1	4773	22	0.00460926	540	0	1	1	689	37	0.053701	91	13	0.0252228	0.175321	912	0	0	131	0	1	1	4021	14	0.00348172	544	0	1	1	1
AT2G24100.1	577	216	0.37435	64	32	7.82016e-06	4.75541e-05	992	3	0.00302419	107	0	1	1	4344	13	0.00299263	434	0	1	1	434	4	0.00921659	58	0	1	1	587	0	0	89	0	1	1	3022	7	0.00231635	392	0	1	1	1
AT2G24120.1	1340	427	0.318657	138	60	6.30441e-07	4.36524e-06	2060	6	0.00291262	224	0	1	1	7749	25	0.00322622	850	1	0.849645	1	999	3	0.003003	132	0	1	1	1657	2	0.001207	220	0	1	1	5956	13	0.00218267	840	0	1	1	1
AT2G24230.1	579	199	0.343696	78	38	2.58437e-06	1.66411e-05	1891	4	0.00211528	206	0	1	1	6508	16	0.00245851	731	1	0.803971	1	557	0	0	79	0	1	1	1608	2	0.00124378	213	0	1	1	5740	6	0.0010453	768	0	1	1	1
AT2G24300.1	782	336	0.429668	107	65	1.33227e-15	2.10526e-14	1076	4	0.00371747	139	1	0.817919	1	3254	15	0.00460971	460	0	1	1	851	0	0	102	0	1	1	1054	3	0.0028463	127	0	1	1	3197	9	0.00281514	407	0	1	1	1
AT2G24330.1	776	189	0.243557	82	32	0.00220629	0.00981572	983	4	0.00406918	116	2	0.413444	1	2820	6	0.00212766	332	0	1	1	531	2	0.00376648	81	0	1	1	803	4	0.00498132	120	0	1	1	2178	4	0.00183655	323	0	1	1	1
AT2G24420.1	826	202	0.244552	86	26	0.125102	0.413569	1060	2	0.00188679	105	0	1	1	3789	10	0.00263922	394	0	1	1	647	1	0.0015456	85	0	1	1	930	2	0.00215054	109	0	1	1	3412	9	0.00263775	391	0	1	1	1
AT2G24530.1	388	301	0.775773	51	42	0	0	594	1	0.0016835	84	1	0.642756	1	2019	3	0.00148588	304	0	1	1	445	0	0	57	0	1	1	684	1	0.00146199	91	0	1	1	2302	6	0.00260643	341	0	1	1	1
AT2G24640.1	877	290	0.330673	108	45	5.34732e-05	0.000293116	1529	6	0.00392413	170	1	0.875466	1	5162	14	0.00271213	570	0	1	1	750	3	0.004	111	0	1	1	1118	2	0.00178891	159	0	1	1	3988	11	0.00275827	553	0	1	1	1
AT2G24690.1	739	384	0.519621	80	51	9.25926e-14	1.24611e-12	1344	4	0.00297619	144	1	0.828741	1	6192	13	0.00209948	697	0	1	1	644	3	0.00465839	77	0	1	1	1143	2	0.00174978	144	0	1	1	5321	9	0.00169141	702	0	1	1	1
AT2G24820.1	702	148	0.210826	96	32	0.0289676	0.108506	969	2	0.00206398	124	0	1	1	3620	8	0.00220994	471	0	1	1	622	2	0.00321543	91	0	1	1	764	3	0.0039267	124	0	1	1	2923	10	0.00342114	447	1	0.453301	1	1
AT2G24830.1	550	235	0.427273	59	33	2.00247e-07	1.4497e-06	1101	9	0.00817439	110	0	1	1	3506	15	0.00427838	385	0	1	1	454	72	0.15859	53	10	0.00750296	0.0546877	798	0	0	94	0	1	1	2275	8	0.00351648	306	1	0.338588	1	1
AT2G25010.1	710	254	0.357746	105	53	6.43109e-09	5.47321e-08	752	3	0.00398936	105	0	1	1	3183	9	0.00282752	438	1	0.623319	1	759	2	0.00263505	108	0	1	1	740	3	0.00405405	105	1	0.49739	1	2639	4	0.00151573	406	0	1	1	1
AT2G25070.1	577	255	0.441941	56	32	1.55716e-07	1.14265e-06	1023	2	0.00195503	81	0	1	1	3662	24	0.0065538	316	1	0.505597	1	546	10	0.018315	56	2	0.940459	1	792	4	0.00505051	80	0	1	1	3012	6	0.00199203	315	0	1	1	1
AT2G25170.1	1648	845	0.512743	178	108	0	0	3335	13	0.00389805	323	3	0.753841	1	11908	44	0.00369499	1198	3	0.49857	1	1285	5	0.00389105	179	1	1	1	2392	12	0.00501672	318	0	1	1	8972	12	0.00133749	1162	0	1	1	1
AT2G25180.1	520	190	0.365385	62	31	1.0787e-05	6.44201e-05	1041	1	0.000960615	122	0	1	1	3994	11	0.00275413	512	1	0.680601	1	524	1	0.0019084	66	0	1	1	966	0	0	128	0	1	1	3453	12	0.00347524	497	0	1	1	1
AT2G25290.1	1286	299	0.232504	133	51	0.000225826	0.00113936	1124	7	0.00622776	140	3	0.243639	1	4367	10	0.0022899	570	2	0.362329	1	1042	1	0.000959693	137	0	1	1	1057	4	0.0037843	144	0	1	1	3344	7	0.0020933	560	0	1	1	1
AT2G25320.1	1999	472	0.236118	254	73	0.0596599	0.211661	3373	11	0.00326119	416	3	0.882358	1	11200	37	0.00330357	1423	1	0.958082	1	1762	8	0.0045403	246	2	1	1	3032	6	0.00197889	397	0	1	1	9672	18	0.00186104	1380	1	0.844989	1	1
AT2G25430.1	1024	241	0.235352	147	59	1.62098e-05	9.45804e-05	575	1	0.00173913	103	1	0.716959	1	2323	4	0.00172191	351	0	1	1	851	0	0	132	0	1	1	526	1	0.00190114	87	0	1	1	1935	4	0.00206718	362	0	1	1	1
AT2G25640.1	757	305	0.402906	86	44	7.1709e-08	5.42121e-07	1874	6	0.00320171	199	0	1	1	6127	8	0.0013057	655	0	1	1	536	0	0	84	0	1	1	1241	4	0.00322321	194	0	1	1	3971	10	0.00251826	623	0	1	1	1
AT2G25660.1	2195	916	0.417312	263	135	0	0	4324	15	0.00346901	502	3	0.943963	1	16775	65	0.00387481	1971	3	0.813831	1	1945	8	0.00411311	251	1	1	1	3616	4	0.00110619	493	0	1	1	13485	29	0.00215054	1870	2	0.717901	1	1
AT2G25730.1	3241	1792	0.552916	379	253	0	0	5792	17	0.00293508	636	3	0.983695	1	19053	50	0.00262426	2129	3	0.852023	1	2773	9	0.00324558	380	3	1	1	4586	5	0.00109027	618	0	1	1	15357	41	0.00266979	2088	0	1	1	1
AT2G25740.1	926	364	0.393089	122	61	7.89161e-10	7.34678e-09	1115	3	0.00269058	126	1	0.786476	1	4181	12	0.00287013	483	0	1	1	749	1	0.00133511	119	0	1	1	786	1	0.00127226	119	0	1	1	3063	6	0.00195886	446	0	1	1	1
AT2G25800.1	1518	483	0.318182	196	79	5.57459e-07	3.88231e-06	2097	7	0.0033381	271	1	0.963877	1	5372	15	0.00279226	717	0	1	1	1331	3	0.00225394	208	1	1	1	1782	5	0.00280584	280	0	1	1	4814	11	0.002285	768	0	1	1	1
AT2G25850.1	1142	496	0.434326	124	73	2.22045e-16	3.68852e-15	2122	14	0.00659755	218	3	0.496301	1	6405	27	0.00421546	710	2	0.469094	1	916	4	0.00436681	120	0	1	1	1601	0	0	208	0	1	1	4987	14	0.0028073	674	0	1	1	1
AT2G25870.1	944	401	0.424788	107	53	1.48487e-08	1.21148e-07	1595	7	0.00438871	162	3	0.315977	1	4199	3	0.000714456	453	0	1	1	724	1	0.00138122	101	0	1	1	1205	3	0.00248963	159	0	1	1	3385	5	0.0014771	475	0	1	1	1
AT2G25930.1	636	205	0.322327	85	38	3.14219e-05	0.00017668	1334	0	0	173	0	1	1	4809	12	0.00249532	625	0	1	1	518	0	0	76	0	1	1	1041	2	0.00192123	154	0	1	1	3680	10	0.00271739	586	0	1	1	1
AT2G26000.1	566	263	0.464664	64	39	5.22857e-10	4.95897e-09	1414	2	0.00141443	151	0	1	1	3888	8	0.00205761	407	0	1	1	483	0	0	52	0	1	1	1228	0	0	139	0	1	1	2816	4	0.00142045	338	0	1	1	1
AT2G26140.1	969	653	0.673891	136	112	0	0	1298	5	0.00385208	172	2	0.620782	1	5138	11	0.00214091	677	3	0.192884	1	942	2	0.00212314	127	1	0.999969	1	1076	1	0.000929368	165	0	1	1	3908	13	0.00332651	601	0	1	1	1
AT2G26180.1	638	153	0.239812	66	24	0.0191853	0.0742098	919	4	0.00435256	90	0	1	1	3639	14	0.00384721	390	0	1	1	489	1	0.00204499	64	0	1	1	686	1	0.00145773	87	0	1	1	2678	4	0.00149365	379	0	1	1	1
AT2G26200.1	883	419	0.474519	89	54	3.4206e-13	4.3659e-12	1506	2	0.00132802	151	0	1	1	4646	14	0.00301334	491	2	0.298548	1	668	0	0	87	0	1	1	1119	0	0	149	0	1	1	3624	4	0.00110375	481	0	1	1	1
AT2G26270.1	690	291	0.421739	76	43	1.85365e-09	1.67561e-08	1365	4	0.0029304	142	1	0.824491	1	4896	12	0.00245098	455	0	1	1	567	0	0	70	0	1	1	1074	7	0.00651769	136	0	1	1	3382	8	0.00236546	431	0	1	1	1
AT2G26280.1	560	267	0.476786	72	41	3.37454e-09	2.95202e-08	1304	2	0.00153374	156	0	1	1	4286	12	0.00279981	523	0	1	1	493	0	0	71	0	1	1	1052	2	0.00190114	153	0	1	1	3362	10	0.00297442	498	0	1	1	1
AT2G26310.1	637	348	0.546311	58	37	2.18487e-10	2.13857e-09	938	2	0.0021322	84	0	1	1	3682	7	0.00190114	349	0	1	1	493	1	0.0020284	57	0	1	1	751	0	0	84	0	1	1	3029	5	0.00165071	349	0	1	1	1
AT2G26330.1	1378	551	0.399855	141	78	3.33067e-15	5.08566e-14	2829	10	0.00353482	244	1	0.949711	1	9966	14	0.00140478	874	0	1	1	1031	4	0.00387973	143	0	1	1	1883	4	0.00212427	240	0	1	1	6794	21	0.00309096	862	1	0.687917	1	1
AT2G26430.1	462	190	0.411255	57	34	1.44148e-08	1.1779e-07	1169	2	0.00171086	119	1	0.767351	1	3274	12	0.00366524	371	0	1	1	351	1	0.002849	53	0	1	1	805	0	0	112	0	1	1	2404	2	0.000831947	320	0	1	1	1
AT2G26460.1	917	240	0.261723	102	38	0.00242997	0.0107224	1227	6	0.00488998	138	4	0.0891333	1	4179	8	0.00191433	511	0	1	1	661	1	0.00151286	95	0	1	1	957	1	0.00104493	136	0	1	1	3501	4	0.00114253	495	0	1	1	1
AT2G26470.1	885	207	0.233898	79	29	0.00934731	0.0379515	1253	3	0.00239425	120	0	1	1	4377	7	0.00159927	421	0	1	1	633	8	0.0126382	79	2	0.987808	1	946	1	0.00105708	116	0	1	1	3300	13	0.00393939	413	0	1	1	1
AT2G26510.1	1364	590	0.432551	157	81	1.71418e-13	2.24646e-12	1375	11	0.008	144	1	0.828741	1	4206	10	0.00237756	462	0	1	1	1105	54	0.0488688	144	7	0.940086	1	1048	12	0.0114504	137	4	0.0128615	0.466389	3291	8	0.00243087	436	0	1	1	1
AT2G26650.1	1378	415	0.301161	158	68	1.88928e-07	1.37107e-06	1648	5	0.00303398	177	0	1	1	6793	17	0.00250258	777	0	1	1	1206	1	0.000829187	152	0	1	1	1330	4	0.00300752	170	0	1	1	5154	17	0.00329841	719	2	0.253438	1	1
AT2G26770.1	1010	376	0.372277	86	44	7.1709e-08	5.42121e-07	1339	4	0.0029873	114	0	1	1	4700	10	0.00212766	449	0	1	1	815	5	0.00613497	85	1	0.999033	1	1002	2	0.00199601	113	0	1	1	3726	5	0.00134192	446	0	1	1	1
AT2G26790.1	1081	402	0.371878	110	52	1.41194e-07	1.03804e-06	1701	4	0.00235156	173	1	0.879961	1	5420	10	0.00184502	666	0	1	1	879	1	0.00113766	105	0	1	1	1321	2	0.001514	155	0	1	1	4266	5	0.00117206	581	0	1	1	1
AT2G26800.1	503	325	0.646123	72	54	0	0	870	0	0	114	0	1	1	3042	11	0.00361604	398	0	1	1	510	2	0.00392157	72	0	1	1	855	1	0.00116959	115	0	1	1	2860	14	0.0048951	402	1	0.419036	1	1
AT2G26860.1	767	284	0.370274	80	38	5.56374e-06	3.43819e-05	629	1	0.00158983	58	0	1	1	3289	10	0.00304044	332	0	1	1	556	1	0.00179856	72	0	1	1	446	1	0.00224215	54	0	1	1	2147	3	0.0013973	291	0	1	1	1
AT2G26890.1	2775	1714	0.617658	378	274	0	0	5528	19	0.00343705	713	7	0.764539	1	16942	60	0.00354149	2219	2	0.957689	1	2701	9	0.0033321	389	1	1	1	5000	15	0.003	735	1	0.991898	1	15051	33	0.00219255	2208	1	0.94935	1	1
AT2G26900.1	528	245	0.464015	58	34	2.66681e-08	2.11892e-07	1163	4	0.00343938	107	1	0.730498	1	4289	5	0.00116577	395	0	1	1	456	3	0.00657895	58	0	1	1	974	3	0.00308008	106	0	1	1	3409	8	0.00234673	383	0	1	1	1
AT2G26910.1	2314	1152	0.497839	279	168	0	0	3064	6	0.00195822	332	2	0.912873	1	10872	27	0.00248344	1206	2	0.74901	1	1961	21	0.0107088	276	5	0.999998	1	2551	6	0.00235202	332	0	1	1	9074	15	0.00165307	1184	0	1	1	1
AT2G26920.1	509	355	0.697446	73	60	0	0	1356	7	0.00516224	184	3	0.388645	1	4118	24	0.00582807	555	0	1	1	462	0	0	70	0	1	1	1209	2	0.00165426	175	0	1	1	3541	4	0.00112962	509	0	1	1	1
AT2G26930.1	716	210	0.293296	68	29	0.000678208	0.00321778	848	2	0.00235849	79	1	0.620183	1	3779	10	0.0026462	356	0	1	1	539	2	0.00371058	66	0	1	1	630	0	0	77	0	1	1	2830	7	0.0024735	354	0	1	1	1
AT2G26980.1	516	103	0.199612	56	16	0.27246	0.825272	719	7	0.00973574	75	3	0.0639693	1	3423	7	0.00204499	333	0	1	1	486	2	0.00411523	56	0	1	1	627	3	0.00478469	78	0	1	1	2799	8	0.00285816	344	1	0.371685	1	1
AT2G27040.1	1264	428	0.338608	127	53	1.16495e-05	6.94931e-05	2330	5	0.00214592	233	0	1	1	8897	20	0.00224795	898	1	0.864902	1	944	0	0	120	0	1	1	1645	6	0.00364742	225	1	0.771029	1	6329	20	0.00316006	861	0	1	1	1
AT2G27050.1	774	144	0.186047	107	40	0.001767	0.00796692	979	2	0.0020429	124	0	1	1	3966	14	0.00353001	530	1	0.693163	1	516	3	0.00581395	107	1	0.99984	1	573	2	0.0034904	117	1	0.535393	1	2312	7	0.00302768	471	0	1	1	1
AT2G27090.1	936	240	0.25641	108	46	2.29109e-05	0.000131207	1450	4	0.00275862	164	2	0.594944	1	5889	20	0.00339616	683	1	0.781833	1	822	3	0.00364964	104	0	1	1	1232	8	0.00649351	152	0	1	1	5039	12	0.00238142	654	0	1	1	1
AT2G27110.1	860	453	0.526744	114	76	0	0	1644	7	0.00425791	208	2	0.721352	1	5606	19	0.00338923	733	2	0.48561	1	762	1	0.00131234	113	1	0.999902	1	1343	2	0.0014892	200	0	1	1	5013	15	0.00299222	715	0	1	1	1
AT2G27150.1	1812	989	0.545806	215	151	0	0	2561	13	0.00507614	290	1	0.97138	1	9977	46	0.0046106	1143	3	0.467845	1	1680	35	0.0208333	211	6	0.999337	1	2319	4	0.00172488	289	0	1	1	8392	14	0.00166826	1123	0	1	1	1
AT2G27170.1	1635	817	0.499694	174	104	0	0	2824	13	0.0046034	282	1	0.968433	1	10023	26	0.00259403	993	1	0.890685	1	1411	8	0.00566974	174	2	0.999989	1	2395	5	0.00208768	279	0	1	1	7984	14	0.00175351	974	0	1	1	1
AT2G27200.1	829	182	0.219542	91	30	0.0388055	0.142096	876	0	0	114	0	1	1	3946	14	0.0035479	479	0	1	1	667	2	0.0029985	93	0	1	1	837	2	0.00238949	115	0	1	1	3173	2	0.000630318	481	0	1	1	1
AT2G27210.1	1326	609	0.459276	183	101	0	0	2391	6	0.00250941	313	2	0.89509	1	6912	13	0.00188079	889	0	1	1	1180	2	0.00169492	171	0	1	1	1936	6	0.00309917	302	1	0.861744	1	5296	9	0.0016994	827	0	1	1	1
AT2G27230.1	964	371	0.384855	120	71	4.44089e-16	7.22206e-15	1256	3	0.00238854	154	1	0.848492	1	4484	8	0.00178412	531	1	0.693846	1	833	3	0.00360144	124	0	1	1	1069	1	0.000935454	153	0	1	1	3613	6	0.00166067	528	0	1	1	1
AT2G27350.1	614	367	0.59772	78	57	0	0	1070	3	0.00280374	133	1	0.804028	1	3578	11	0.00307434	422	2	0.242026	1	544	0	0	83	0	1	1	943	1	0.00106045	141	0	1	1	2886	9	0.0031185	456	0	1	1	1
[truncated: 8,069 more rows]

## Sheet: TableS4
GeneID	Chr	Start	End	Strand	Length	logFC	logCPM	PValue	FDR	Group
[truncated: 9,368 more rows]

## Sheet: TableS5
	Differentially expressed
[truncated: 4 more rows]

[truncated: 3 more sheets: TableS6, TableS7, TableS8]
